# Supplementary material for: A MOOC Video Viewing Behavior Analysis Algorithm
Source: Hindawi journal article supplement (doi:10.1155/2018/7560805), 2018-10-16
Supplement: f1 [file 7560805.f1.zip]

Archive with 4 entries (4 files):
- Advanced Mathematics.xlsx
- First Aid Knowledge.xlsx
- Game Theory.xlsx
- supplementary description.docx
