# Supplementary material for: A MOOC Video Viewing Behavior Analysis Algorithm
Source: Hindawi journal article supplement (doi:10.1155/2018/7560805), 2018-10-16
Supplement: f1 [file 7560805.f1.zip › Advanced Mathematics.xlsx]

## Sheet: Sheet1
number	1	2	3	4	5	6	7	8	9	10	11	12	13	14	15	16	17	18	19	20	21	22	23	24	25	26	27	28	29	30	31	32	33	34	35	36	37	38	39	40	41	42	43	44	45	46	47	48	49
Video Length	574000	276000	936000	278000	181000	444000	412000	178000	730000	311000	341000	240000	438000	239000	291000	618000	401000	401000	715000	150000	583000	892000	728000	762000	186000	464000	604000	264000	225000	645000	511000	489000	254000	413000	927000	1387000	92000	489000	545000	941000	829000	391000	1022000	914000	1368000	276000	534000	493000	347000
1014730421	600000	320000	1110000	0	0	0	0	0	0	0	0	270000	500000	260000	10000
1015353939	610000	300000	1000000	310000	0	0	0	0	0	0	0	240000	520000	280000	340000	0	0	0	0	0	0	0	0	0	0	0	0	0	0	0	0	0	0	0	0	0	0	0	0	0	0	0	0	0	0	0	0	0	0
1016068678	0	300000	960000	0	0	0	0	0	0	0	0	0	10000
1016605536	0	270000	520000
1017083535	270000	540000	60000	0	0	0	0	0	0	0	0	210000	410000
1017290519	960000	310000	970000	320000	0	0	0	300000	240000	420000	0	540000	560000	130000	320000	530000	10000	0	0	0	0	0	0	0	0	0	0	0	0	0	0	0	0	0	0	0	0	0	0	0	0	0	0	0	0	0	0	0	0
1017612902	640000	340000	980000	0	0	0	0	0	0	0	0	260000	580000	350000	210000
1017659985	0	210000	740000	0	0	0	0	0	0	0	0	0	100000
1017785888	0	240000	250000
1017791630	0	60000	60000
1017867753	30000	250000	1240000	0	0	0	0	0	0	0	0	390000	700000
1018344138	0	0	20000
1018483725	0	330000	440000
1019227889	0	310000	560000
1019386803	0	280000	470000
1019452036	0	320000	910000	230000	0	0	0	0	0	280000	0	0	40000	80000	290000	0	0	20000	200000	160000	450000	0	0	0	0	350000	0	0	0	0	0	0	220000	0	0	0	0	0	0	0	0	0	0	0	0	0	0	0	0
1019929208	0	320000	240000
1019962865	370000	20000	960000	0	0	0	0	0	0	0	0	260000	530000	0	0	0	0	0	0	0	0	0	0	0	0	0	0	0	0	0	0	0	0	0	0	0	0	0	0	0	0	0	0	0	0	0	0	0	0
1019986496	0	0	10000
1020037734	10000	60000	180000	0	0	0	0	0	0	0	0	140000	240000
1020175993	0	310000	560000
1020583840	0	0	1000000	0	0	0	0	0	0	0	0	0	20000
1020593652	0	0	20000
1020646529	0	390000	670000
1020920050	0	0	20000
1020968560	40000	130000	40000	0	0	0	0	0	0	0	0	0	0	10000	0	0	0	0	0	120000
1021114560	600000	140000	930000	310000	0	0	0	0	0	0	0	270000	450000	260000	320000	0	0	0	0	0	0	0	0	0	0	0	0	0	0	0	0	0	0	0	0	0	0	0	0	0	0	0	0	0	0	0	0	0	0
1021264506	0	110000	10000
1021286762	530000	270000	890000	0	0	0	0	0	0	0	0	260000	460000	130000	20000	0	0	0	0	120000	10000
1021374575	0	300000	950000	0	0	0	0	0	0	0	0	0	120000
1021466791	70000	0	230000	0	0	0	0	50000	20000	30000	0	50000	30000	20000	20000	100000	0	0	0	10000	0	0	0	0	0	0	0	0	0	0	0	0	0	0	0	0	0	0	0	0	0	0	0	0	0	0	0	0	0
1021501463	360000	350000	1240000	0	0	0	0	50000	0	0	260000	150000	330000	70000	0	290000	320000	300000	0	190000	250000
1021580907	630000	500000	1070000	0	0	0	0	0	0	0	0	340000	510000	170000	0	0	0	0	700000	90000	350000	600000	270000	400000	0	0	0	0	0	0	0	0	20000
1021588921	770000	310000	980000	0	0	0	0	0	0	0	0	300000	510000	280000	30000
1021597592	330000	330000	1070000	310000	0	0	0	0	0	340000	0	300000	510000	140000	310000	0	0	0	0	50000	0	0	0	0	0	0	0	0	0	0	0	0	0	0	0	0	0	0	0	0	0	0	0	0	0	0	0	0	0
1021623280	0	280000	820000	0	0	0	0	0	0	0	0	0	390000	20000	0	0	0	0	0	10000	0	0	0	0	0	0	0	0	0	0	0	0	0	0	0	0	0	0	0	0	0	0	0	0	0	0	0	0	0
1021656291	580000	330000	970000	300000	30000	20000	0	0	0	0	0	280000	490000	170000	290000	0	0	0	0	0	0	0	0	0	0	0	0	0	0	0	0	0	0	0	0	0	0	0	0	0	0	0	0	0	0	0	0	0	0
1021718694	570000	0	250000	40000	0	0	0	180000	400000	210000	310000	150000	240000	200000	130000	350000	370000	330000	0	170000	10000	0	0	0	0	0	0	0	0	0	0	0	0	0	0	0	0	0	0	0	0	0	0	0	0	0	0	0	0
1021785535	650000	300000	360000	0	0	0	0	200000	540000	230000	340000	330000	560000	260000	50000	660000	470000	210000	0	0	0	0	0	0	0	0	0	0	0	0	0	0	0	0	0	0	0	0	0	0	0	0	0	0	0	0	0	0	0
1021809507	0	320000	10000	0	0	0	0	0	0	320000	0	0	0	0	300000	0	0	0	0	150000	0	0	0	0	0	450000	0	0	0	0	0	0	0	0	20000	0	0	0	0	0	0	0	0	0	0	0	0	0	0
1021817070	0	320000	10000
1021845147	0	190000	780000	0	0	0	0	0	0	0	0	0	30000
1021856169	600000	300000	960000	210000	0	0	0	0	0	0	0	260000	470000	250000	300000	0	0	0	0	0	0	0	0	0	0	0	0	0	0	0	0	0	0	0	0	0	0	0	0	0	0	0	0	100000	0	0	0	0	0
1021895546	0	370000	90000	0	0	0	0	60000	10000	260000	0	0	0	0	0	0	0	0	0	0	0	0	0	0	0	0	0	0	0	0	0	0	0	0	0	0	0	0	0	0	0	0	0	0	0	0	0	0	0
1021898082	0	190000	120000
1022035598	0	340000	1270000	0	0	0	0	0	0	0	0	10000	20000	10000
1022076595	450000	0	440000	0	0	0	0	0	0	0	0	650000	140000	150000
1022096986	0	220000	100000
1022328674	0	310000	750000	0	0	0	0	0	0	0	0	0	0	0	0	0	0	0	0	0	0	0	0	0	0	480000	0	0	0	0	0	0	0	0	880000
10563491	20000	80000	260000	0	0	0	0	0	0	0	0	80000	110000	0	0	0	0	0	0	0	10000
10748049	0	390000	110000	0	0	0	0	0	70000	340000	0	0	0	280000	320000	0	0	0	0	0	0	0	0	0	0	0	0	0	0	0	0	0	0	0	0	0	0	0	0	0	0	0	0	0	0	0	0	0	0
11210769	0	290000	750000
11322004	590000	300000	1020000	290000	0	0	0	0	0	0	0	270000	500000	260000	360000	0	0	0	800000	170000	610000	1070000	760000	790000	0	30000	0	0	0	0	0	0	0	0	0	0	0	0	0	0	0	0	0	0	0	0	0	0	0
11745540	180000	180000	580000	70000	0	0	0	0	0	0	0	20000	350000	60000	170000
12954811	840000	260000	1260000	20000	0	0	0	0	0	0	0	380000	560000	140000	190000
1932011	0	210000	640000	0	0	0	0	0	0	0	0	0	30000
3092546	0	330000	790000	0	0	0	0	210000	740000	330000	590000	10000	110000	0	0	750000	430000	480000	750000	170000	590000	1450000	750000	780000	0	240000	0	0	0	0	0	0	0	0	0	0	0	0	0	0	0	0	0	0	0	0	0	0	0
3153030	0	310000	410000
3158321	10000	170000	490000	0	0	0	0	0	0	0	0	170000	260000	0	0	0	0	0	0	0	0	0	0	0	0	0	0	0	0	0	0	0	0	0	0	0	0	0	0	0	0	0	0	0	0	0	0	0	0
3222404	0	210000	150000
3315720	0	290000	210000
4908471	590000	310000	990000	40000	0	0	0	230000	900000	390000	10000	290000	750000	260000	290000	700000	420000	0	0	0	0	0	0	0	0	0	0	0	0	0	0	0	0	0	0	0	0	0	0	0	0	0	0	0	0	0	0	0	0
576148	630000	310000	1130000	300000	0	0	0	0	0	0	0	390000	600000	300000	330000
6053416	0	310000	940000
6604261	0	310000	850000	70000	0	0	0	0	0	0	0	0	10000	0	310000
7908957	0	660000	40000	0	0	0	0	0	0	20000	0	0	150000	0	0	0	0	0	0	0	540000	0	0	0	0	10000	0	0	0	0	0	0	0	0	0	0	0	0	1000000	510000	300000	460000	1550000	0	0	0	730000	40000	470000
932908	0	310000	460000
968727	0	310000	960000	0	0	0	0	0	0	0	0	0	20000
10136016	590000	340000	1110000	0	0	0	0	0	0	0	0	290000	480000	170000	20000	0	0	0	160000	190000	610000	1010000	620000	0	0	10000
1014328230	590000	310000	340000	330000	0	0	0	200000	740000	330000	360000	280000	460000	320000	70000	750000	410000	420000	720000	170000	610000	910000	750000	790000	0	10000	0	0	0	0	0	0	0	0	0	0	0	0	0	0	0	0	0	0	0	0	0	0	0
1014867667	480000	310000	950000	130000	0	0	0	0	0	180000	0	310000	450000	190000	270000
1015609983	590000	290000	990000	0	0	0	0	220000	820000	340000	440000	260000	460000	270000	0	660000	360000	300000	0	40000	20000	170000	0	0	0	0	0	0	0	0	0	0	0	0	0	0	0	0	0	0	0	0	0	0	0	0	0	0	0
1015637274	590000	0	970000	210000	0	0	0	0	0	0	0	280000	460000	260000	320000	0	0	0	0	0	0	0	780000	790000	0	480000	0	0	0	0	0	0	0	0	60000
1016075406	0	250000	50000
1016398501	220000	320000	1040000	0	0	0	0	0	0	0	370000	350000	600000	0	0	0	190000	430000	0	10000	0	0	0	0	0	0	0	0	0	0	0	0	0	0	0	0	0	0	0	0	0	0	0	0	0	0	0	0	0
1016566540	0	320000	40000
1017146916	620000	300000	960000	0	0	0	0	0	0	0	0	260000	440000	240000	10000
1017174108	580000	330000	990000	0	0	0	0	0	0	0	0	270000	480000
1017386158	0	20000	390000	230000	0	0	460000	0	0	350000	0	0	40000	0	320000
1017744464	0	300000	650000	0	0	0	0	0	0	0	0	0	0	0	0	0	0	0	740000	170000	620000	90000
1017870653	0	440000	1020000	0	0	0	0	0	0	0	0	0	1200000
1017974760	0	310000	960000	0	0	0	0	0	0	0	0	0	460000
1018063854	590000	310000	1080000	60000	0	0	0	0	0	400000	0	280000	560000	270000	320000	0	0	0	0	0	0	0	0	0	0	0	0	0	0	0	0	0	0	0	0	0	0	0	0	0	0	0	0	0	0	0	0	0	0
1018878366	20000	130000	70000	30000	30000	30000	80000	30000	100000	50000	40000	30000	40000	30000	40000	70000	60000	30000	50000	30000	50000	70000	40000	90000	60000	50000	100000	40000	0	20000	0	0	40000	0	50000	90000	0	0	0	0	0	0	0	0	0	0	0	0	0
1018989370	0	1180000	700000	0	0	0	0	0	0	20000	0	0	0	0	0	0	0	0	0	20000	0	0	50000
1019358645	600000	380000	970000	160000	0	0	0	0	0	0	0	260000	460000	230000	240000	0	0	0	0	0	0	0	0	0	0	0	0	0	0	0	0	0	0	0	0	0	0	0	0	0	0	0	0	0	0	0	0	0	0
1019378629	830000	320000	1440000	0	0	0	0	20000	0	0	0	330000	580000	260000	140000	0	0	0	0	0	0	0	0	0	0	0	0	0	0	0	0	0	0	0	0	0	0	0	0	0	0	0	0	0	0	0	0	0	0
1019883246	670000	310000	1200000	0	0	0	0	0	0	360000	0	260000	540000	350000	0	0	0	0	0	0	0	0	0	0	0	340000	0	330000	0	140000	0	0	250000	0	0	0	0	0	70000	210000	0	0	0	0	0	100000	350000	130000	40000
1020229422	0	0	30000
1020358416	600000	300000	1020000	70000	0	0	0	0	0	0	0	270000	460000	270000	350000	0	0	0	680000	170000	550000	970000	770000	660000	210000	0	430000	400000	0	930000	20000	0	270000	440000	20000	1500000	0	0	0	0	0	0	0	0	0	0	0	0	0
1020393220	0	310000	30000
1020410831	0	280000	310000
1020438282	0	280000	810000
1020534540	490000	300000	980000	0	0	0	0	0	0	0	0	240000	420000	260000	90000
1020598197	0	310000	630000
1020630842	0	0	130000
1020656060	0	300000	320000
1020825581	0	660000	1490000	0	0	0	0	0	0	0	0	0	40000
1020848898	0	310000	600000
1020859425	0	280000	280000
1021050533	0	320000	140000
1021191696	0	300000	110000	0	0	0	0	0	0	100000	0	0	0	0	0	0	0	0	0	0	0	0	0	0	0	0	0	0	0	0	0	0	0	0	0	0	0	0	0	0	0	0	0	0	0	0	0	0	0
1021209467	0	0	10000
1021214568	0	330000	750000	0	0	0	0	210000	910000	330000	0	0	0	0	220000	20000	0	0	0	0	0	0	0	0	0	0	0	0	0	0	0	0	0	0	0	0	0	0	0	0	0	0	0	0	0	0	0	0	0
1021335799	0	310000	970000	0	0	0	0	0	0	0	0	170000	560000	0	180000	0	0	0	0	0	0	0	0	0	0	0	0	0	0	0	0	0	0	0	0	0	0	0	0	0	740000	450000	0	0	0	290000	380000	350000	0
1021338538	0	350000	20000
1021370116	0	20000	10000	0	0	0	0	0	0	0	0	20000
1021410618	600000	260000	950000	520000	0	0	0	0	0	0	0	260000	470000	260000	320000	0	0	0	0	0	0	0	0	0	0	0	0	0	0	0	0	0	0	0	0	0	0	0	0	0	0	0	0	0	0	0	0	0	0
1021420004	0	300000	730000
1021513339	0	260000	20000
1021604345	540000	320000	1380000	0	0	0	0	0	0	0	0	260000	480000
1021607791	370000	230000	560000	0	0	0	0	120000	390000	200000	200000	150000	270000	160000	30000	390000	250000	0	410000	270000	330000	510000	450000	440000	120000	370000	260000	160000	0	430000	0	0	140000	20000	490000	740000	60000	280000	0	0	0	0	0	1510000	950000	40000	0	0	0
1021625072	0	270000	1570000	0	0	0	0	0	0	0	0	0	240000
1021629304	0	450000	990000	0	0	0	0	0	0	0	0	30000	600000
1021638962	0	10000	920000	0	0	0	0	0	0	0	0	0	20000
1021650715	0	40000	10000	10000	0	0	0	0	0	90000	0	0	0	0	30000
1021685775	0	180000	780000	0	0	0	0	0	0	0	0	250000	100000
1021688338	630000	220000	1010000	0	0	0	0	0	450000	330000	0	230000	110000	310000	60000	0	0	0	0	0	0	0	0	0	0	0	0	0	0	0	0	0	0	0	0	0	0	0	0	0	0	0	0	0	0	0	0	0	0
1021697457	0	310000	960000
1021708034	0	310000	910000	0	0	0	0	0	0	300000	0	0	160000	0	20000
1021723769	0	170000	90000
1021730677	0	300000	980000	0	0	0	0	0	0	0	0	10000	620000
1021742010	0	280000	300000
1021751115	0	320000	20000
1021756783	0	340000	100000
1021761455	350000	310000	970000	0	0	0	0	0	0	0	0	230000	500000	20000	100000
1021764821	0	440000	1080000	0	0	0	0	0	0	0	0	0	20000
1021767071	0	280000	10000
1021772903	0	270000	880000	310000	0	0	0	0	0	170000	0	0	450000	0	10000	0	0	0	0	0	0	0	0	0	0	240000	0	250000	0	670000	0	0	230000	450000	30000	0	0	0	0	0	0	0	0	0	0	0	0	0	0
1021785691	0	310000	40000
1021806734	0	250000	770000	0	0	0	0	0	0	100000	0	0	270000
1021819181	0	330000	1150000
1022089288	0	300000	320000
1022197880	620000	310000	990000	320000	0	0	0	0	0	0	0	280000	520000	280000	440000	0	0	0	0	0	0	0	0	0	0	0	0	0	0	0	0	0	0	0	0	0	0	0	0	0	0	0	0	0	0	0	0	0	0
1022263602	0	290000	540000
1022308202	0	310000	1030000	0	0	0	0	0	0	0	0	20000	510000
11158510	0	320000	1330000	0	0	0	0	0	0	0	0	0	250000
11792080	0	310000	400000
11858407	590000	510000	1130000	0	0	0	0	0	0	0	0	270000	540000	210000	60000	0	0	0	0	50000
1716564	590000	330000	1000000	160000	0	0	90000	200000	750000	340000	610000	270000	460000	270000	320000	650000	430000	430000	0	170000	400000	0	0	0	0	0	0	0	0	0	0	0	0	0	0	0	0	0	0	0	0	0	0	0	0	0	0	0	0
2220028	740000	310000	1010000	710000	0	0	10000	0	200000	370000	0	270000	470000	160000	320000	0	0	0	0	0	0	0	0	0	0	0	0	0	0	0	0	0	0	0	0	0	0	0	0	0	0	0	0	0	0	0	0	0	0
2307415	0	10000	950000	0	0	0	0	0	0	0	0	0	500000
2694645	0	390000	680000	0	0	0	0	0	0	0	0	0	220000
3238260	0	310000	1060000	0	0	0	0	0	0	0	0	0	410000
3533871	590000	300000	960000	0	0	0	0	0	0	0	0	260000	460000	260000	0	0	0	0	0	160000	600000
4991456	0	310000	940000	10000	0	0	0	0	0	350000	0	0	80000	0	320000	0	0	0	0	0	0	0	0	0	0	0	0	0	0	0	0	0	0	0	0	0	0	0	0	0	0	0	0	0	0	0	0	0	0
5115088	0	310000	720000
5292336	0	40000	10000
6091637	0	210000	790000
620114	0	310000	860000
6942881	0	300000	100000	0	0	0	0	0	0	110000	0	0	0	0	60000
7394645	0	320000	970000
7785720	690000	50000	1030000	30000	0	0	0	0	0	0	0	340000	620000	270000	360000	0	0	0	0	0	0	0	0	0	0	0	0	0	0	0	0	0	0	0	0	0	0	0	0	0	0	0	0	0	0	0	0	0	0
825520	590000	170000	750000	180000	290000	540000	330000	110000	450000	240000	260000	250000	450000	270000	280000	350000	270000	430000	710000	120000	710000	950000	730000	760000	140000	260000	360000	30000	0	0	0	0	50000	0	550000	730000	0	0	60000	100000	0	30000	190000	60000	160000	10000	10000	30000	40000
8338253	330000	160000	490000	160000	0	0	0	0	100000	200000	0	190000	240000	170000	180000	0	0	0	0	0	0	0	0	0	0	0	0	0	0	0	0	0	0	0	0	0	0	0	0	0	0	0	0	0	0	0	0	0	0
9066700	0	380000	760000
9196511	20000	20000	20000	20000	10000	0	10000	0	0	20000	0	20000	20000	10000	10000	0	0	0	0	0	0	0	0	0	0	0	0	0	0	0	0	0	0	0	0	0	0	0	0	0	0	0	0	0	0	0	0	0	0
9478631	390000	240000	580000	600000	130000	280000	260000	0	340000	220000	0	160000	280000	170000	310000	0	0	0	0	0	0	0	0	0	0	0	0	0	0	0	0	0	0	0	0	0	0	0	0	0	0	0	0	0	0	0	0	0	0
9581852	20000	390000	490000	20000	20000	20000	20000	30000	20000	40000	160000	30000	50000	20000	50000	20000	20000	20000	20000	60000	20000	20000	30000	20000	20000	20000	20000	30000	20000	30000	20000	20000	20000	30000	20000	20000	0	0	0	0	0	0	0	20000	20000	0	0	0	0
1014798278	0	0	10000
1016148206	0	20000	1000000	0	0	0	0	0	0	0	0	70000	490000
1016406324	680000	310000	1030000	350000	0	0	0	0	0	0	0	420000	500000	280000	370000	0	0	0	0	0	0	0	0	0	0	0	0	0	0	0	0	0	0	0	0	0	0	0	0	0	0	0	0	0	0	0	0	0	0
1016671935	0	110000	200000
1016699210	1200000	1230000	2000000	330000	0	0	0	0	0	0	0	530000	930000	450000	930000
1016782518	560000	230000	640000	0	0	0	0	0	0	0	0	190000	110000	200000	360000	0	0	0	0	0	0	0	0	0	0	0	0	0	0	0	0	0	0	0	0	0	0	0	0	0	0	0	0	0	0	0	0	0	0
1017684381	650000	330000	970000	420000	0	0	0	0	360000	0	0	280000	460000	320000	390000	0	0	0	0	0	0	0	0	0	0	0	0	0	0	0	0	0	0	0	0	0	0	0	0	0	0	0	0	0	0	0	0	0	0
1017768399	0	340000	500000	0	0	0	0	0	0	0	0	0	0	0	20000
1019085335	0	320000	1720000	0	0	0	0	0	0	0	0	0	40000
1019471303	0	310000	20000	0	0	0	0	0	0	0	0	0	0	260000
1019522470	0	290000	970000	0	0	0	0	0	0	0	0	250000	460000	0	0	0	0	0	0	0	0	0	0	0	0	0	0	280000	0	680000	110000	0	270000	420000	0	0	0	0	0	0	0	0	0	0	0	0	0	0	0
1019709855	0	310000	70000	0	0	0	0	0	0	0	0	0	0	0	0	0	0	0	0	0	0	0	0	0	0	0	0	0	0	0	0	0	0	0	0	0	0	0	0	0	0	0	0	0	0	0	0	0	0
1019714981	0	70000	170000
1020059721	410000	220000	10000	0	0	0	0	0	0	0	0	190000	310000	30000
1020134617	0	180000	590000
1020366148	0	320000	310000
1020443379	0	10000	400000
1020490951	0	330000	660000	0	0	0	0	0	0	0	0	0	0	0	0	0	0	0	0	0	0	0	0	0	0	0	0	0	0	0	0	0	0	0	0	0	0	0	0	0	0	0	0	0	0	0	0	0	0
1020654939	0	270000	10000	0	0	0	0	0	0	0	0	0	0	0	60000
1020834726	600000	330000	910000	0	0	0	0	0	0	0	0	260000	460000	260000	10000
1020985019	0	100000	210000
1021084739	0	320000	710000	0	0	0	0	0	0	0	0	0	0	0	0	0	0	0	700000	230000	630000	980000	420000
1021091254	0	10000	60000
1021095126	0	310000	1080000	0	0	0	0	0	0	0	0	50000	450000
1021263338	0	320000	1030000
1021389849	0	330000	950000	0	0	0	0	0	0	0	0	0	20000	0	0	0	0	0	0	0	0	0	0	0	0	0	0	140000	0	0	0	0	270000	0	0	0	0	0	0	0	0	0	0	0	0	0	0	0	0
1021390102	0	130000	920000
1021482975	0	20000	10000	0	0	0	0	0	0	0	0	10000
1021510937	0	330000	980000	0	0	0	0	0	0	0	0	0	30000
1021568844	0	430000	290000
1021569900	0	310000	310000
1021619634	0	400000	50000
1021656503	0	310000	630000
1021686412	30000	40000	320000	0	0	0	0	0	0	0	0	30000	20000
1021731905	0	300000	10000
1021761539	460000	350000	1050000	210000	0	0	0	230000	320000	0	110000	70000	430000	220000	210000	300000	240000	330000	650000	150000	560000	440000	710000	660000	160000	320000	230000	370000	0	580000	0	0	190000	350000	330000	500000	0	0	0	0	0	0	0	590000	1220000	0	0	0	0
1021783498	250000	130000	220000	0	0	0	0	110000	300000	150000	110000	0	0	90000	50000	300000	20000	170000	0	0	0	0	0	0	0	0	0	0	0	0	0	0	0	0	0	0	0	0	0	0	0	0	0	0	0	0	0	0	0
1021806928	0	320000	1220000
1021865525	0	360000	900000	10000	0	20000	10000	0	10000	20000	900000	0	0	0	220000	580000	310000	700000	1030000	140000	690000	1740000	1580000	1220000	0	0	0	0	0	0	0	0	0	0	0	0	0	0	0	0	0	0	0	0	0	0	0	0	0
1021970773	640000	380000	1010000	310000	0	0	0	0	0	0	0	270000	530000	280000	330000	0	0	0	0	0	0	0	0	0	0	0	0	0	0	0	0	0	0	0	0	0	0	0	0	0	0	0	0	0	0	0	0	0	0
1022000987	0	400000	1120000	0	0	0	0	0	0	0	0	0	230000
1022119650	350000	250000	640000	200000	40000	0	0	50000	270000	0	330000	160000	280000	100000	190000	380000	250000	340000	430000	120000	140000	190000	90000	330000	0	180000	0	0	0	0	0	140000	0	0	0	0	110000	490000	100000	0	0	0	0	380000	630000	130000	280000	0	200000
10541604	50000	310000	550000	440000	530000	50000	20000	0	0	70000	30000	20000	60000	40000	200000	10000	30000	30000	430000	10000	20000	20000	10000	10000	0	450000	10000	70000	10000	30000	10000	30000	20000	10000	460000	10000	0	0	0	0	0	0	0	0	0	0	0	0	0
10983004	0	240000	280000
11631278	0	310000	890000
1180997	0	310000	390000
12092744	380000	40000	600000	0	0	0	0	0	190000	200000	0	160000	300000	80000	20000	20000	0	0	0	10000	0	0	0	0	0	0	0	0	0	0	0	0	0	0	0	0	0	0	0	0	0	0	0	450000	0	0	0	0	0
12147390	0	40000	110000
1218065	20000	240000	490000	310000	20000	20000	70000	30000	20000	50000	20000	280000	520000	150000	270000	30000	20000	20000	80000	50000	40000	30000	30000	30000	30000	30000	80000	20000	30000	30000	30000	70000	40000	20000	30000	30000	30000	20000	40000	20000	0	0	0	30000	20000	40000	30000	30000	30000
12736660	0	240000	20000
1649045	600000	340000	1010000	60000	0	0	0	0	0	330000	0	270000	500000	310000	320000
2301191	0	60000	10000	0	0	0	0	0	0	10000	0	0	0	0	0	0	0	0	0	0	0	0	0	0	0	0	0	0	0	0	0	0	0	0	0	0	0	0	0	0	0	0	0	0	0	0	0	0	0
3597744	0	260000	20000
499498	590000	310000	960000	300000	0	0	0	0	0	0	0	260000	460000	270000	320000	0	0	0	0	0	0	0	0	0	0	0	0	0	0	0	0	0	0	0	0	0	0	0	0	0	0	0	0	0	0	0	0	0	0
5333731	890000	310000	980000	520000	150000	270000	0	0	0	110000	0	320000	580000	260000	370000	10000	0	0	0	0	0	0	0	0	0	0	0	0	0	0	0	0	0	0	0	0	0	0	0	0	0	0	0	0	0	0	0	0	0
5349516	0	300000	100000
6564532	620000	380000	970000	30000	0	0	0	0	0	0	0	270000	470000	230000	320000
7424820	0	220000	350000
768091	670000	90000	1710000	710000	200000	710000	130000	0	0	100000	0	290000	720000	250000	190000	0	0	0	0	0	0	0	0	0	0	0	0	0	0	0	0	0	30000	0	0	0	0	0	0	0	0	0	0	0	0	0	0	0	0
8234189	0	0	10000	0	0	0	0	0	0	0	0	0	0	0	0	0	0	0	0	10000	0	0	0	0	0	0	0	0	0	0	0	0	0	0	0	0	0	0	0	0	0	0	0	0	0	0	0	10000	0
8267934	0	380000	10000	0	0	0	0	0	0	0	0	0	0	320000	40000
8688148	0	300000	10000	0	0	0	0	0	0	0	0	0	0	0	0	0	0	0	0	0	0	0	0	0	0	0	0	0	0	0	0	0	0	0	0	0	0	0	0	0	0	0	0	0	0	0	0	0	0
9509282	580000	270000	930000	0	0	0	0	210000	750000	200000	10000	260000	450000	260000	20000	650000	330000	0	0	160000	310000	0	0	0	0	470000	0	0	0	0	0	0	0	0	550000	0	0	0	0	0	0	0	0	0	0	0	0	0	0
1014730877	590000	290000	960000	310000	0	0	0	0	20000	320000	0	260000	460000	260000	320000	0	0	0	0	0	0	0	0	0	0	0	0	0	0	0	0	0	0	0	0	0	0	0	0	0	0	0	0	0	0	0	0	0	0
1015122716	370000	510000	200000	330000	0	0	0	0	0	0	0	50000	280000	270000	440000	0	0	0	0	0	0	0	0	0	0	0	0	0	0	0	0	0	0	0	0	0	0	0	0	0	0	0	0	0	0	0	0	0	0
1015554153	30000	20000	30000	0	0	0	0	0	0	0	0	20000	30000	10000	0	0	0	0	40000	10000	30000	10000	20000	40000	30000	20000	30000	10000	20000	20000	20000	10000	20000	90000	20000	30000	0	0	0	0	0	0	0	0	30000	0	0	0	0
1017517763	10000	20000	20000	10000	10000	20000	20000	20000	10000	20000	10000	10000	20000	0	20000	10000	20000	0	0	0	0	0	0	0	0	0	0	0	0	0	0	0	0	0	0	0	0	0	0	0	0	0	0	0	0	0	0	0	0
1017720295	0	80000	620000	0	0	0	0	0	0	0	0	310000	1030000	0	0	0	0	0	0	200000	260000	0	0	0	0	0	0	0	0	0	0	0	0	0	0	0	0	0	0	0	0	0	0	0	0	0	0	0	0
1017834538	590000	30000	1040000	0	0	0	0	200000	750000	330000	370000	260000	460000	270000	0	610000	430000	420000	730000	160000	600000	920000	750000	770000	210000	480000	620000	0	0	0	0	0	0	0	990000	1740000	0	0	0	0	0	0	0	0	0	0	0	0	0
1017921702	0	0	20000
1017931561	1090000	310000	1300000	300000	220000	480000	430000	200000	790000	370000	560000	310000	530000	260000	320000	690000	500000	440000	680000	220000	630000	980000	1060000	1160000	190000	570000	0	0	0	0	0	0	0	0	990000	1520000	0	0	0	0	0	0	0	0	0	0	0	0	0
1018248839	0	300000	10000
1018379346	0	460000	950000	0	0	0	0	0	0	0	0	0	220000
1019044021	0	0	10000	300000	30000	10000	0	210000	760000	350000	280000	0	0	0	320000	620000	170000	520000	740000	180000	620000	940000	740000	520000	210000	30000	620000	270000	10000	840000	560000	0	300000	470000	0	1780000	110000	480000	590000	1000000	1100000	430000	670000	890000	1400000	290000	580000	460000	350000
1019325610	470000	320000	970000	430000	400000	0	0	0	0	0	0	250000	450000	0	0	0	0	0	0	0	0	0	0	0	0	0	0	0	0	0	0	0	0	0	0	0	0	0	0	0	0	0	0	0	0	0	0	0	0
1019625305	0	0	10000
1019721258	0	300000	1290000	0	0	0	0	0	0	0	0	0	20000	0	10000
1019786873	260000	180000	1060000	0	0	0	0	0	0	0	0	690000	500000	0	260000
1019940059	0	0	60000
1019956210	250000	300000	550000	200000	0	0	0	80000	240000	190000	0	270000	240000	10000	190000	310000	20000	0	0	0	0	0	0	0	0	30000	0	0	0	0	0	0	0	0	0	0	0	0	0	0	0	0	0	0	0	0	0	0	0
1020170429	0	270000	400000
1020197495	0	0	20000
1020213654	0	0	10000	0	0	0	0	0	0	0	0	10000	100000
1020415405	850000	300000	1100000	330000	220000	290000	0	0	0	0	0	270000	510000	260000	320000	0	0	0	0	0	0	0	0	0	0	0	0	0	0	0	0	0	0	0	0	0	0	0	0	0	0	0	0	0	0	0	0	0	0
1020480926	10000	260000	1010000	0	0	0	0	0	0	0	0	210000	380000
1020481262	410000	190000	610000	30000	0	0	10000	0	10000	10000	0	200000	360000	210000	190000	0	0	0	0	0	0	0	0	0	130000	0	450000	190000	210000	470000	520000	390000	240000	320000	0	210000	70000	300000	0	0	0	0	0	490000	750000	0	0	0	0
1020499027	0	220000	620000	0	0	0	0	0	0	0	0	0	260000
1020587519	0	0	50000
1020862269	350000	180000	610000	50000	0	0	0	0	0	0	0	10000	240000	90000	180000	0	0	0	0	0	0	0	0	0	0	0	0	0	0	0	0	0	0	0	0	0	0	0	0	0	0	0	0	0	0	0	0	0	0
1020947706	50000	360000	80000	0	0	0	0	0	0	0	0	30000	30000	30000
1020970531	0	0	30000	0	0	0	0	0	0	0	0	0	0	0	0	0	0	0	0	0	0	0	0	0	0	0	0	0	0	0	0	0	0	0	0	0	100000	0	0	0	0	0	0	800000	20000	0	0	0	0
1020986602	0	190000	310000
1021081144	0	0	10000	0	0	0	0	0	0	0	0	0	0	0	0	0	0	0	0	0	0	0	0	0	0	0	0	0	0	0	0	0	0	0	0	0	0	0	0	0	0	0	0	0	0	0	0	0	0
1021341833	0	110000	10000	0	0	0	0	0	0	0	0	0	0	0	0	0	0	0	0	40000	290000	0	0	0	0	0	0	0	0	0	0	0	0	0	0	0	0	0	0	0	0	0	0	0	0	0	0	0	0
1021485232	860000	300000	960000	0	0	0	0	0	0	0	0	260000	440000	270000	120000
1021504306	800000	310000	970000	0	0	0	0	0	0	0	0	270000	470000	0	0	0	0	0	890000	80000	500000	990000	790000	0	800000	680000	50000	0	0	0	0	0	30000	0	1420000	1670000	0	0	0	0	0	0	0	310000	0	0	0	0	0
1021505365	0	100000	850000	0	0	0	0	0	0	0	0	0	220000
1021532507	0	70000	1280000	0	0	0	0	0	0	0	0	0	40000
1021569330	0	290000	450000
1021590477	0	310000	1010000
1021628499	460000	350000	1220000	0	0	0	0	0	0	0	0	270000	120000
1021638649	670000	340000	1140000	160000	40000	40000	0	0	0	340000	0	430000	550000	260000	320000	0	0	0	0	0	0	0	0	0	0	0	0	0	0	0	0	0	0	0	0	0	0	0	0	0	0	0	0	0	0	0	0	0	0
1021659772	630000	500000	910000	0	0	0	0	0	0	0	0	280000	480000	320000	0	0	0	0	750000	210000	610000
1021710817	0	310000	670000
1021735207	0	280000	70000
1021757746	0	310000	880000	0	0	0	0	0	0	0	0	0	0	0	0	0	0	0	0	130000	10000
1021760331	340000	310000	990000	170000	140000	270000	240000	10000	390000	190000	0	150000	510000	170000	200000	0	0	0	0	0	0	0	0	0	0	0	0	0	0	0	0	0	0	0	0	0	0	0	0	0	0	0	0	0	0	0	0	0	0
1021760856	0	380000	1110000	0	0	0	0	0	0	0	0	0	200000
1021762627	0	280000	40000
1021824068	660000	310000	960000	360000	10000	40000	20000	200000	470000	330000	10000	300000	480000	270000	360000	610000	60000	10000	0	20000	0	0	0	0	0	0	0	0	0	0	0	0	0	0	0	0	0	0	0	0	0	0	0	0	0	0	0	0	0
1021845199	0	350000	970000	0	0	0	0	0	0	0	0	0	20000
1021846354	0	280000	10000
1021864754	0	50000	40000	0	0	0	0	0	0	20000	0	0	20000
1021974273	100000	300000	900000	0	0	0	0	0	0	0	0	240000	410000
1022077032	0	310000	40000	0	0	0	0	0	0	0	0	0	220000
1022098787	0	210000	210000
1022153501	0	320000	1780000	0	0	0	0	320000	1190000	410000	0	0	0	0	0	720000	0	1090000	1740000	170000	1100000	2300000	1610000	1100000	450000	40000	1360000	770000	570000	1980000	1380000	90000	570000	920000	2190000	3400000	0	0	0	0	0	0	0	0	0	0	0	0	0
12584064	610000	290000	990000	310000	0	0	0	200000	790000	380000	400000	250000	470000	280000	310000	680000	440000	450000	770000	240000	810000	970000	820000	640000	0	10000	0	0	0	0	0	0	0	0	0	0	0	0	0	0	0	0	0	0	0	0	0	0	0
12740484	520000	320000	960000	0	0	0	0	0	0	0	0	270000	470000	270000	10000
13012805	640000	300000	1060000	0	0	0	0	0	0	0	0	90000	520000	120000
1427729	360000	120000	500000	0	40000	70000	40000	0	0	10000	0	80000	170000	160000	140000	0	0	0	0	0	0	0	0	0	0	0	0	0	0	0	0	0	0	0	0	0	0	0	0	0	0	0	0	0	0	0	0	0	0
2018476	600000	740000	1080000	330000	280000	560000	540000	200000	830000	930000	820000	290000	560000	300000	390000	690000	500000	1000000	830000	220000	710000	490000	0	0	0	0	0	0	0	0	0	0	0	0	0	0	0	0	0	0	0	0	0	0	0	0	0	0	0
2090069	0	300000	180000	0	0	0	0	0	0	330000	0	0	0	0	0	0	0	0	0	0	0	0	0	0	0	0	0	0	0	0	0	0	0	0	0	0	0	0	0	0	0	0	0	0	0	0	0	0	0
3393932	0	500000	960000	0	0	0	0	0	0	0	0	50000	460000
3528556	0	450000	300000	0	0	0	0	0	0	0	0	0	0	0	0	0	0	0	0	30000	0	0	0	0	0	0	0	0	0	0	0	0	0	0	0	0	0	0	0	0	0	0	0	0	0	0	0	0	0
4469988	270000	570000	970000	0	0	0	0	0	0	10000	0	460000	470000	30000	0	0	0	0	0	0	0	0	0	0	0	0	0	430000	0	500000	0	0	270000
6162511	610000	350000	1060000	0	0	0	0	0	0	0	0	250000	480000	150000	0	0	0	0	0	160000	0	0	0	0	0	0	0	0	0	0	0	0	0	0	0	0	0	0	0	0	0	0	0	0	0	0	0	0	0
8088718	20000	70000	40000	390000	30000	20000	20000	50000	20000	360000	20000	140000	30000	30000	410000	20000	20000	20000	40000	50000	10000	20000	30000	30000	20000	50000	20000	10000	20000	20000	20000	30000	30000	30000	30000	30000	20000	20000	30000	40000	40000	20000	20000	20000	20000	50000	20000	30000	30000
9164370	0	540000	60000	30000	0	0	0	240000	740000	310000	620000	10000	30000	0	180000	650000	390000	470000	0	150000	110000	0	0	0	0	0	0	0	0	0	0	0	0	0	0	0	0	0	0	0	0	0	0	0	0	0	0	0	0
9553055	0	10000	1020000	0	0	0	0	0	0	0	0	0	0	310000	30000	0	0	0	0	0	0	0	0	0	0	0	0	0	0	0	0	0	0	0	0	0	0	0	0	0	0	0	0	0	0	0	0	0	0
9832587	610000	0	910000	310000	0	0	0	220000	880000	340000	0	270000	30000	260000	320000	660000	300000	0	100000	0	80000	940000	10000	870000	0	510000	110000	0	260000	0	560000	20000	290000	460000	1210000	1440000	0	0	0	0	0	0	0	0	0	0	0	0	0
9838035	30000	70000	1080000	0	50000	30000	0	0	60000	40000	0	30000	100000	10000	40000	0	0	0	0	0	0	0	0	0	0	0	0	0	0	0	0	0	0	0	0	0	0	0	0	0	0	0	0	0	0	0	0	0	0
1014209600	0	350000	270000	0	0	0	0	0	0	0	0	0	10000	0	0	0	0	0	0	0	0	0	0	0	0	0	0	0	0	0	0	0	0	0	0	0	0	0	0	0	0	0	0	0	0	0	0	0	0
1014854981	0	300000	1010000	40000	0	0	0	0	340000	320000	0	0	20000	0	130000	0	0	0	0	70000	330000	0	0	0	0	0	0	0	0	0	0	0	0	0	0	0	0	0	0	0	0	0	0	0	0	0	0	0	0
1015049230	20000	60000	20000	20000	20000	20000	20000	20000	20000	20000	20000	20000	20000	20000	20000	20000	20000	20000	20000	40000	20000	10000	10000	20000	20000	20000	20000	20000	20000	30000	20000	20000	90000	20000	20000	20000	20000	20000	20000	20000	20000	20000	20000	20000	20000	20000	20000	20000	20000
1015443742	0	100000	140000	0	210000	480000	450000	0	270000	350000	360000	0	0	0	0	0	0	420000	780000	170000	620000	470000	0	0	220000	460000	630000	160000	0	0	0	0	270000	0	970000	1490000	130000	600000	570000	990000	730000	400000	0	930000	1450000	300000	450000	530000	380000
1015541884	540000	260000	860000	220000	0	0	0	10000	90000	80000	40000	190000	310000	190000	200000	30000	70000	0	0	0	30000	0	0	0	0	10000	0	10000	180000	230000	450000	510000	0	720000	0	0	0	0	0	0	0	0	0	0	0	0	0	0	0
1016030842	0	360000	1200000	0	0	0	0	0	0	10000	0	120000	790000	0	0	0	0	0	0	0	0	0	0	0	0	0	0	0	0	0	0	0	0	0	0	0	0	0	0	0	0	0	0	0	0	0	0	0	0
1016680326	0	290000	480000
1016725627	0	280000	960000	0	0	0	0	0	0	0	0	0	80000
1017863838	0	20000	20000
1018486056	0	0	100000
1018502413	0	260000	980000
1018637339	310000	240000	570000	0	0	0	0	0	0	0	0	140000	260000	150000
1019049050	0	310000	1030000	0	0	0	0	0	0	0	0	0	40000	0	0	0	0	0	0	0	0	0	0	0	0	0	0	0	0	0	0	0	0	0	0	0	0	0	0	0	0	0	0	840000	500000	0	0	0	0
1019164074	0	570000	650000
1019393094	0	360000	710000
1019603821	420000	360000	1380000	290000	0	0	0	0	0	0	0	290000	430000	20000	320000	0	0	0	0	0	0	0	0	0	0	0	0	0	0	0	0	0	0	0	0	0	0	0	0	0	0	0	0	680000	1060000	0	0	0	0
1019995171	570000	250000	810000	280000	160000	200000	0	170000	640000	280000	250000	230000	450000	220000	250000	520000	290000	290000	590000	120000	410000	600000	580000	10000	0	0	0	0	0	0	0	0	0	0	0	0	0	0	0	0	0	0	0	0	0	0	0	0	0
1020344748	400000	230000	640000	0	0	0	0	0	0	0	0	180000	310000	190000	180000
1020458205	0	300000	970000	0	0	0	0	0	0	0	0	250000	460000
1020624954	490000	220000	870000	0	0	0	0	0	0	0	0	210000	350000	200000	120000
1020659354	0	290000	990000
1020690115	0	200000	970000	0	0	0	0	0	0	0	0	0	300000	0	0	0	0	0	0	0	0	0	0	0	0	20000
1020829964	610000	130000	920000	0	240000	610000	530000	220000	830000	440000	350000	260000	510000	100000	0	700000	360000	390000	590000	310000	510000	740000	620000	20000	260000	380000	870000	300000	270000	860000	830000	670000	290000	500000	1250000	1520000	0	0	0	0	0	0	0	0	0	0	0	0	0
1020867180	0	300000	420000	0	0	0	0	0	0	0	0	0	0	0	0	0	0	0	0	0	0	0	0	0	20000	340000	20000	0	0	0	0	0	0	0	10000
1020964681	0	320000	1070000	0	0	0	0	0	0	0	0	0	20000
1021117677	500000	240000	770000	250000	170000	420000	230000	80000	620000	290000	290000	220000	380000	210000	260000	280000	370000	370000	600000	160000	490000	730000	370000	0	0	0	0	0	0	0	0	0	0	0	0	0	0	0	0	0	0	0	330000	0	0	0	0	0	0
1021334050	0	300000	990000	0	0	0	0	0	0	0	0	0	10000
1021448337	0	0	30000
1021537129	590000	300000	1000000	320000	0	0	0	0	0	0	0	330000	460000	260000	320000	0	0	0	770000	170000	620000	930000	800000	790000	0	40000	0	280000	0	790000	450000	0	300000	430000	70000	0	0	0	0	0	0	0	0	0	0	0	0	0	0
1021540613	0	310000	60000	0	0	0	0	0	0	0	0	0	0	0	0	0	0	0	0	0	0	0	0	0	0	0	0	0	0	0	0	0	0	0	0	0	0	0	0	0	0	0	0	960000	710000	0	0	0	0
1021576135	10000	110000	160000	0	0	0	0	0	0	0	0	10000	130000	10000
1021675391	0	20000	10000	310000	210000	10000	0	0	0	0	0	0	0	0	320000	0	0	0	0	0	0	0	0	0	0	0	0	0	0	0	0	0	0	0	0	0	0	0	0	0	0	0	0	0	0	0	0	0	0
1021718863	0	300000	130000
1021770524	710000	340000	1080000	350000	0	0	0	0	0	0	0	260000	480000	260000	350000	0	0	0	390000	150000	380000	540000	470000	530000	130000	200000	540000	260000	0	690000	0	0	280000	130000	0	1020000	80000	430000	0	0	0	0	0	510000	1020000	40000	0	0	0
1021772328	580000	140000	270000	20000	30000	20000	0	0	0	0	0	10000	0	80000	140000	0	0	0	510000	130000	450000	90000	20000	0	0	0	0	0	0	0	0	0	0	0	0	0	0	0	0	0	0	0	0	0	0	80000
1021816741	380000	660000	1060000	40000	0	0	0	0	0	310000	0	160000	440000	160000	200000	0	0	100000	270000	90000	340000	260000	470000	760000	190000	470000	0	0	0	0	0	0	0	0	950000	1410000
1021840102	0	330000	240000
1021946255	620000	330000	1070000	550000	230000	400000	60000	210000	440000	420000	0	270000	500000	270000	370000	380000	0	430000	760000	200000	620000	750000	240000	0	0	10000	900000	470000	0	720000	0	90000	10000	360000	390000	260000	0	0	0	0	0	0	0	550000	0	0	0	0	0
1021966091	0	200000	10000
1021985159	490000	270000	850000	260000	0	0	0	0	0	0	0	270000	420000	220000	260000	0	0	0	0	0	0	0	0	0	0	0	0	0	0	0	0	0	0	0	0	0	0	0	0	0	0	0	0	0	0	0	0	0	0
1022029104	0	340000	950000	0	0	0	0	0	0	0	0	0	10000
1022062530	0	30000	470000	110000	0	0	0	40000	150000	60000	40000	10000	260000	70000	240000	140000	0	0	70000	50000	70000	120000	190000	0	20000	10000	60000	30000	0	0	0	0	50000	0	50000	10000	0	0	0	0	0	0	0	0	0	0	0	0	0
1022106896	0	250000	710000	0	0	0	0	0	0	0	0	0	10000
1022216085	830000	320000	1030000	30000	0	0	0	0	0	0	0	290000	0	220000	310000	0	0	0	860000	0	280000	700000	830000	830000	290000	480000	800000	0	0	0	0	0	0	0	1100000	1620000
1022248529	720000	490000	1060000	330000	10000	0	0	230000	800000	350000	410000	320000	490000	260000	350000	690000	520000	480000	0	0	0	0	0	0	0	0	0	0	0	0	0	0	0	0	0	0	0	0	0	0	0	0	0	0	0	0	0	0	0
11246658	440000	330000	720000	0	0	0	0	190000	520000	230000	270000	190000	310000	190000	100000	440000	300000	160000	0	0	0	650000	1030000	940000	0	300000	0	0	0	0	0	0	0	0	640000	940000	0	0	0	0	0	0	0	0	0	0	0	0	0
1144577	0	70000	100000
12262970	0	40000	50000	0	0	0	0	0	0	0	0	10000	10000
12917872	610000	320000	960000	330000	240000	500000	440000	220000	790000	360000	390000	320000	490000	260000	420000	760000	500000	430000	830000	170000	630000	1060000	40000	0	0	0	0	0	0	0	0	0	0	0	0	0	0	0	0	0	0	0	0	0	0	0	0	0	0
1823904	570000	220000	830000	0	0	0	0	0	0	0	0	210000	400000	30000	0	0	0	0	0	0	0	0	0	0	200000	410000	620000	280000	0	720000	0	0	260000	80000	60000	1280000	0	0	0	0	0	0	0	0	0	0	0	0	0
1903385	0	240000	820000	0	0	0	0	0	0	0	0	0	20000
2378164	0	330000	10000	0	0	0	0	0	0	310000	0	0	0	0	0	0	0	0	920000	380000	1630000	220000	0	0	0	0	0	0	0	0	0	0	0	0	0	0	0	0	0	0	0	0	0	1230000	1020000	0	0	0	0
2867389	0	340000	150000
4429293	50000	330000	1100000	0	0	0	0	0	0	0	0	350000	490000	0	0	0	0	0	0	10000	0	0	0	0	0	0	0	0	0	0	0	0	0	0	0	0	0	0	0	0	0	0	0	0	0	0	0	0	0
5442134	0	310000	1410000	0	0	0	0	0	0	0	0	0	270000
6025428	0	0	170000	0	0	0	0	0	0	0	0	70000	750000
8166798	0	170000	170000
9629713	0	0	750000
9780605	0	330000	10000	0	0	0	0	0	0	0	0	0	0	0	50000
9787134	0	320000	680000	0	0	0	0	0	0	0	0	0	80000
992227	40000	300000	970000	40000	0	0	0	200000	450000	150000	400000	30000	20000	0	60000	500000	350000	440000	0	0	0	0	0	0	0	0	0	0	0	0	0	0	0	0	0	0	0	0	0	0	0	0	0	0	0	0	0	0	0
1014619781	0	330000	160000
1015917635	0	300000	1090000	10000	30000	30000	20000	20000	30000	50000	20000	0	200000	0	20000	20000	20000	20000	0	20000	10000	0	0	0	40000	10000	20000	10000	20000	20000	10000	30000	20000	10000	10000	0	0	0	0	0	0	0	0	0	0	0	0	0	0
1017659012	540000	320000	820000	60000	0	0	0	0	0	0	0	260000	430000	220000	250000
1018733360	710000	200000	1110000	350000	0	0	0	0	0	0	0	320000	330000	340000	400000	0	0	0	0	0	0	0	0	0	0	0	0	0	0	0	0	0	0	0	0	0	0	0	0	0	0	0	0	0	0	0	0	0	0
1018800460	0	300000	430000
1019063035	0	160000	110000	0	0	0	0	0	0	0	0	0	0	0	0	0	0	0	0	0	0	0	0	0	0	0	0	0	0	0	0	0	0	0	0	0	0	0	0	0	0	0	0	0	0	0	0	0	0
1019511420	340000	290000	1320000	0	0	0	0	0	0	0	0	270000	550000
1019679742	0	280000	960000	0	0	0	0	0	0	0	0	0	460000	140000	310000	0	0	0	0	0	10000	0	0	0	0	0	0	0	0	0	0	0	0	0	0	0	0	0	0	0	0	0	0	0	0	0	0	0	0
1020546086	0	0	50000
1020602582	0	280000	330000
1020674024	590000	300000	980000	310000	0	0	0	0	0	0	0	270000	480000	290000	380000	0	0	0	0	0	0	0	0	0	0	0	0	0	0	0	0	0	0	0	0	0	0	0	0	0	0	0	0	0	0	0	0	0	0
1020798797	0	40000	20000	0	0	0	0	0	0	0	0	0	0	140000
1020801099	0	280000	60000
1020822678	650000	300000	1280000	0	0	0	0	250000	850000	390000	0	330000	490000	270000	330000	440000	0	0	0	0	0	0	0	0	0	0	0	0	0	0	0	0	0	0	0	0	0	0	0	0	0	0	0	0	0	0	0	0	0
1020993736	0	150000	790000	0	0	0	0	0	0	0	0	0	310000
1021133032	590000	0	90000	300000	220000	460000	440000	0	420000	330000	360000	280000	660000	260000	310000	630000	440000	440000	750000	190000	630000	1010000	780000	750000	200000	500000	660000	300000	210000	720000	540000	480000	270000	430000	920000	1400000	0	0	0	0	0	0	0	0	0	0	0	0	0
1021183060	0	20000	40000
1021264608	740000	290000	980000	310000	0	0	0	0	0	0	0	330000	470000	250000	330000	0	0	0	0	0	0	0	0	0	0	0	0	0	0	0	0	0	0	0	0	0	0	0	0	0	0	0	0	0	0	0	0	0	0
1021388177	0	60000	40000	0	0	0	0	0	580000	0	0	0	0	0	0	0	0	0	0	10000	0	0	0	0	0	0	0	0	0	0	0	0	0	0	0	0	0	0	0	0	0	0	0	0	0	0	0	0	0
1021397777	0	20000	10000	0	0	0	0	0	0	0	0	0	0	10000
1021471873	0	50000	170000	0	0	0	0	0	0	0	0	0	0	0	0	0	0	0	0	0	0	0	0	0	0	0	0	0	0	0	0	0	0	0	0	0	0	0	0	0	0	0	0	0	0	0	0	0	0
1021508762	0	300000	1130000	0	0	0	0	0	0	0	0	0	190000
1021509257	660000	350000	1200000	30000	0	0	0	0	0	0	0	270000	540000	320000	340000
1021512851	440000	310000	960000	0	0	0	0	0	0	0	0	270000	370000
1021513805	0	310000	260000
1021547149	630000	310000	1090000	400000	260000	840000	460000	220000	860000	390000	320000	290000	500000	270000	460000	680000	380000	350000	610000	170000	550000	650000	570000	530000	270000	380000	450000	200000	170000	490000	410000	410000	210000	290000	690000	970000	80000	370000	390000	720000	600000	290000	1080000	650000	980000	230000	380000	360000	260000
1021563855	20000	450000	650000	20000	20000	30000	20000	290000	1260000	440000	620000	20000	80000	20000	100000	950000	450000	1070000	860000	190000	1120000	470000	60000	20000	20000	70000	20000	30000	20000	10000	30000	10000	40000	30000	30000	20000	0	0	20000	90000	40000	50000	20000	0	0	40000	30000	20000	20000
1021591968	0	370000	710000
1021619730	0	350000	1250000	0	0	0	0	0	0	0	0	0	170000	0	20000
1021705170	0	320000	690000
1021737474	970000	510000	1510000	680000	0	0	0	0	0	0	0	380000	730000	310000	560000
1021750778	470000	310000	370000	0	0	0	0	0	0	0	0	70000	170000
1021865896	0	300000	980000
1021880718	0	280000	990000	0	0	0	0	0	0	0	0	0	510000	0	0	0	0	0	0	0	0	0	0	0	0	480000	0	0	0	0	0	0	0	0	770000	280000
1022020751	0	360000	550000	0	0	0	0	0	0	0	0	330000	350000
1022182415	560000	310000	900000	30000	0	0	0	200000	770000	330000	430000	0	460000	260000	60000	630000	660000	450000	760000	160000	610000	70000	0	0	0	0	0	0	0	0	0	0	0	0	0	0	0	0	0	0	0	0	0	0	0	0	0	0	0
1022251058	0	330000	1250000
1022277472	10000	20000	70000	20000	20000	30000	20000	0	0	10000	0	20000	20000	30000	50000	0	0	0	0	0	0	0	0	0	0	0	0	0	0	0	0	0	0	0	0	0	0	0	0	0	0	0	0	0	0	0	0	0	0
1022311910	0	200000	200000
10606834	0	330000	580000
10854051	480000	290000	990000	0	0	0	0	0	0	0	0	260000	520000
11315982	0	300000	770000
12196449	580000	300000	910000	330000	0	0	0	0	250000	130000	0	280000	450000	260000	320000	0	0	0	0	0	0	0	0	0	0	0	0	0	0	0	0	0	0	0	0	0	0	0	0	0	0	0	0	0	0	0	0	0	0
12309117	0	240000	640000	0	0	0	0	0	220000	220000	0	0	30000	0	0	0	0	0	0	50000	0	0	0	0	0	0	0	0	0	0	0	0	0	0	0	0	0	0	0	0	0	0	0	0	0	0	0	0	0
12735161	620000	90000	1100000	160000	0	0	0	0	0	0	0	320000	480000	260000	320000
12767979	610000	0	340000	10000	0	0	0	0	0	0	0	280000	460000	260000	330000	0	0	0	0	0	0	0	0	0	0	0	0	0	0	0	0	0	0	0	0	0	0	0	0	0	0	0	0	0	0	0	0	0	0
1533943	50000	290000	1180000	200000	260000	470000	10000	200000	1610000	410000	30000	270000	520000	240000	310000	650000	450000	0	0	0	0	0	0	0	0	0	0	0	0	0	0	0	0	0	0	0	0	0	0	0	0	0	0	0	0	0	0	0	0
1649581	0	300000	20000	0	0	0	0	0	0	160000	0	0	0	0	0	0	0	0	0	0	0	0	0	0	0	0	0	0	0	0	0	0	0	0	0	0	0	0	0	0	0	0	0	0	0	0	0	0	0
1787218	0	310000	1310000	0	0	0	0	0	0	0	0	0	240000
1979875	590000	290000	960000	310000	0	0	0	310000	770000	340000	350000	290000	450000	260000	310000	710000	430000	420000	0	120000	0	0	0	0	190000	20000	540000	280000	0	670000	0	0	270000	10000	960000	1570000	0	0	0	0	0	0	0	0	0	0	0	0	0
2335447	0	310000	1870000	0	0	0	0	0	0	20000	0	0	0	0	20000	0	0	0	0	0	0	0	0	0	0	10000	0	0	0	0	0	0	0	0	0	0	0	0	0	0	0	0	0	0	0	0	0	0	0
2658616	700000	330000	1070000	10000	0	0	0	220000	750000	350000	430000	260000	540000	260000	310000	660000	420000	470000	760000	170000	600000	910000	130000	730000	0	490000	0	0	0	0	0	0	0	0	20000	0	0	0	0	0	0	0	0	0	0	0	0	0	0
2831484	0	180000	30000	240000	0	0	0	0	0	0	0	0	0	130000	240000
3412710	0	140000	10000	10000	10000	20000	10000	10000	20000	10000	0	0	0	10000	30000	0	0	0	0	0	0	0	0	0	0	0	0	0	0	0	0	0	0	0	0	0	0	0	0	0	0	0	0	0	0	0	0	0	0
3620272	0	300000	10000	10000	0	0	0	0	0	230000	0	0	0	260000	270000	0	0	0	0	360000	130000	0	0	0	0	60000	0	290000	0	170000	0	0	150000	0	40000	0	0	0	0	0	0	710000	0	270000	0	10000	0	0	0
3679342	0	340000	200000
4470951	500000	320000	780000	330000	260000	0	0	0	0	0	0	230000	380000	220000	260000	0	0	0	0	0	0	0	0	0	0	0	0	0	0	0	0	0	0	0	0	0	0	0	0	0	0	0	0	0	0	0	0	0	0
4540427	520000	190000	740000	250000	60000	20000	0	150000	470000	240000	260000	210000	320000	180000	240000	540000	260000	270000	0	0	0	0	0	0	190000	430000	590000	0	0	0	0	0	0	0	820000	1140000	0	0	0	0	0	0	0	0	0	0	0	0	0
5579556	610000	330000	1120000	80000	0	0	0	0	0	50000	0	260000	460000	270000	330000	0	0	0	0	130000	640000
6023917	620000	340000	1000000	220000	0	0	0	190000	830000	340000	420000	270000	470000	260000	310000	680000	430000	450000	740000	180000	640000	970000	810000	810000	230000	340000	640000	280000	0	200000	0	0	270000	0	950000	1470000	110000	330000	600000	500000	1320000	400000	460000	970000	1440000	300000	570000	510000	380000
6208495	0	380000	970000	0	0	0	0	0	0	0	0	80000
626732	710000	340000	960000	40000	0	0	0	0	0	0	0	290000	490000	270000	470000
642385	500000	140000	610000	260000	0	0	0	0	0	0	0	220000	420000	220000	260000	0	0	0	0	0	0	0	0	0	0	0	0	0	0	0	0	0	0	0	0	0	0	0	0	0	0	0	0	0	0	0	0	0	0
6614362	0	60000	70000
7259168	570000	290000	940000	320000	0	0	0	0	0	0	0	260000	480000	260000	310000	0	0	0	0	0	0	0	0	0	0	0	0	0	0	0	0	0	0	0	0	0	0	0	0	0	0	0	0	0	0	0	0	0	0
9066050	370000	330000	1000000	0	0	190000	440000	200000	760000	340000	360000	260000	460000	0	0	650000	430000	420000	740000	170000	600000	930000	760000	810000	210000	460000	630000	950000	240000	1280000	530000	500000	610000	420000	0	1040000	110000	520000	0	0	850000	450000	1050000	980000	1410000	0	0	520000	0
9150197	0	300000	1320000	0	0	0	0	0	0	0	0	0	20000
10010113	0	0	20000
1014164349	0	30000	10000
1014639049	860000	120000	890000	300000	0	0	0	0	0	0	0	350000	620000	300000	410000	50000	0	0	0	0	0	0	0	0	0	0	0	0	0	0	0	0	0	0	0	0	0	0	0	0	0	0	0	0	0	0	0	0	0
1014968488	550000	310000	970000	0	0	0	0	0	0	0	0	260000	540000	260000	200000
1015489852	0	300000	950000	0	0	0	0	20000	0	160000	0	60000	400000	0	0	0	0	0	0	0	0	0	0	0	0	0	0	0	0	0	0	0	0	0	0	0	0	0	0	0	0	0	0	0	0	0	0	0	0
1015757919	640000	260000	1060000	320000	400000	540000	60000	0	0	30000	0	300000	530000	260000	310000	0	0	0	20000	150000	600000	0	0	0	0	600000	0	0	0	0	0	0	0	0	10000	0	0	0	0	0	0	0	0	0	0	0	0	0	0
1015813071	0	330000	960000	0	0	0	0	0	0	0	0	0	110000
1015867702	940000	390000	1670000	300000	260000	510000	490000	200000	810000	310000	360000	270000	540000	260000	350000	700000	400000	550000	580000	170000	570000	710000	570000	610000	230000	450000	700000	320000	280000	910000	600000	430000	270000	600000	1040000	1550000	0	0	0	0	0	0	0	830000	80000	0	0	0	0
1016515877	20000	300000	980000	0	0	0	0	0	0	0	0	260000	490000
1016832251	0	240000	1060000	0	0	0	0	0	0	0	0	20000	460000
1017169178	0	310000	870000
1017614458	0	240000	690000	110000	0	0	0	0	0	0	0	0	0	0	260000	0	0	0	430000	240000	640000	510000	120000	0	0	280000	0	0	0	0	0	0	0	0	20000	0	0	0	0	0	0	0	0	0	0	0	0	0	0
1017785651	0	300000	130000
1017916408	0	270000	60000
1018663536	0	370000	1000000	310000	0	0	0	0	0	0	0	0	10000	0	340000	0	0	0	0	0	0	0	0	0	0	0	0	0	0	0	0	0	0	0	0	0	0	0	0	0	0	0	0	0	0	0	0	0	0
1018751264	0	300000	480000
1018815933	0	160000	40000	0	0	0	0	0	0	20000	0	0	10000	0	0	0	0	0	0	40000	0	0	0	0	0	10000	0	0	0	0	0	0	10000	0	0	120000
1019100995	0	310000	970000	0	0	0	0	0	0	30000	0	0	20000	0	20000	0	0	0	0	40000	0	0	0	0	0	0	0	0	0	0	0	0	0	0	0	0	0	0	0	0	0	0	0	0	0	0	0	0	0
1019303291	0	10000	60000	0	0	0	0	0	0	0	0	0	0	0	0	0	0	0	0	0	0	0	0	0	0	0	0	0	0	0	0	0	10000	0	0	0	0	0	0	0	0	0	0	0	0	0	0	0	0
1019354273	590000	310000	1170000	90000	0	0	0	0	0	0	0	270000	520000	290000	340000
1019634759	0	0	10000
1019680695	40000	320000	700000	0	0	0	0	0	0	0	0	270000	460000
1020015725	0	0	30000
1020054261	600000	250000	970000	0	0	0	0	0	0	0	0	260000	470000	260000
1020331612	0	400000	20000
1020412715	1080000	1050000	2160000	40000	0	0	0	0	0	60000	0	260000	1000000	380000	110000	0	0	0	560000	200000	520000	650000	0	0	0	0	0	0	0	0	0	0	0	0	0	0	0	0	0	0	0	0	0	0	0	0	0	0	0
1020419453	620000	300000	960000	30000	0	0	0	210000	700000	330000	60000	260000	470000	240000	310000	440000	210000	0	0	0	0	0	0	0	0	0	0	0	0	0	0	0	0	0	0	0	0	0	0	0	0	0	0	0	0	0	0	0	0
1020498287	0	30000	160000	0	0	0	0	0	0	0	0	0	220000
1020518112	0	0	60000
1020644419	600000	330000	970000	0	0	0	0	0	0	310000	0	270000	460000	100000	130000	0	0	0	0	0	0	0	0	0	0	0	0	0	0	0	0	0	0	0	0	0	0	0	0	0	0	0	0	0	0	0	0	0	0
1020745020	0	270000	80000
1020780500	0	370000	260000	0	0	0	0	0	500000	360000	0	0	0	0	0	0	0	0	550000	170000	580000	0	0	0	0	0	0	0	0	0	0	0	0	0	0	0	0	0	0	0	0	0	0	0	0	0	0	0	0
1020846800	0	0	30000
1021129027	0	300000	370000
1021255692	0	310000	160000
1021333569	590000	300000	950000	700000	0	0	0	0	0	0	0	280000	450000	540000	330000	0	0	0	0	0	0	0	0	0	0	0	0	0	0	0	0	0	0	0	0	0	0	0	0	0	0	0	0	0	0	0	0	0	0
1021374665	600000	310000	980000	310000	10000	20000	20000	250000	780000	360000	0	260000	460000	270000	310000	720000	10000	0	0	0	0	0	0	0	0	0	0	0	0	0	0	0	0	0	0	0	0	0	0	0	0	0	0	0	0	0	0	0	0
1021576331	580000	170000	1100000	340000	0	0	0	200000	750000	330000	370000	260000	470000	260000	320000	660000	430000	250000	0	50000	0	0	0	0	0	0	0	0	0	0	0	0	0	0	0	0	0	0	0	0	0	0	0	0	0	0	0	0	0
1021590702	490000	310000	970000	0	0	0	0	0	0	0	0	260000	460000
1021593073	790000	370000	1140000	120000	0	0	0	0	0	0	0	340000	450000	230000	340000
1021595589	690000	40000	990000	300000	230000	390000	30000	210000	710000	330000	0	290000	440000	260000	320000	640000	420000	0	0	0	0	0	0	0	0	0	0	0	0	0	0	0	0	0	0	0	0	0	0	0	0	0	0	0	0	0	0	0	0
1021599794	0	310000	890000	0	0	0	0	0	0	0	0	0	480000
1021628290	0	300000	200000
1021651711	0	30000	30000	0	0	0	0	0	0	0	0	0	0	0	0	0	0	0	0	20000	100000
1021677641	0	480000	50000	0	0	0	0	0	50000	260000	0	0	0	0	0	0	0	0	760000	280000	570000	880000	820000	840000	200000	450000	40000	0	0	0	0	0	0	0	1060000	770000	90000	520000	320000	870000	60000	330000	0	50000	380000	290000	570000	490000	390000
1021705397	0	500000	1510000	0	0	0	0	0	0	0	0	0	380000
1021738526	0	310000	980000	0	0	0	0	0	0	0	0	0	350000
1021750153	600000	300000	960000	320000	230000	540000	260000	0	250000	360000	0	280000	490000	220000	330000	0	0	0	590000	160000	560000	530000	420000	560000	170000	460000	450000	310000	260000	670000	620000	600000	340000	430000	860000	1220000	190000	510000	760000	580000	0	0	0	960000	1480000	320000	710000	30000	440000
1021754762	480000	250000	1080000	0	20000	0	0	0	240000	290000	0	270000	470000	210000	90000	0	0	0	0	0	0	0	0	10000	0	60000	0	0	0	0	0	0	0	0	0	0	0	0	0	0	0	0	0	0	0	0	0	0	0
1021776083	0	190000	10000	0	0	0	0	0	0	0	0	0	0	50000
1021783018	740000	180000	980000	110000	0	0	0	0	0	0	0	270000	460000	450000	550000
1021789470	0	100000	140000
1021821455	870000	70000	990000	20000	0	0	0	0	0	0	0	270000	550000	80000	260000
1021823996	530000	270000	810000	260000	0	0	0	0	0	230000	0	220000	410000	220000	280000	0	0	0	0	0	0	0	0	0	0	0	0	0	0	0	0	0	0	0	0	0	0	0	0	0	0	0	0	0	0	0	0	0	0
1021843381	0	310000	1060000
1021852486	600000	330000	1070000	0	0	0	0	0	0	0	0	290000	300000	220000	0	0	0	0	0	70000	150000	0	0	0	0	20000	0	280000	0	0	0	0	60000
1021876716	0	300000	500000
1021918533	600000	370000	710000	260000	0	0	0	0	330000	360000	0	260000	450000	260000	120000	0	0	0	0	0	0	0	0	0	0	490000	0	0	0	0	0	0	20000	0	990000	310000	0	0	0	0	0	0	0	0	0	0	0	0	0
1021991545	140000	20000	670000	0	0	0	0	0	0	0	0	150000	270000
1022032498	0	140000	100000
1022087993	0	330000	970000	0	0	0	0	0	0	0	0	80000	10000
1022183077	0	380000	460000	0	0	0	0	0	0	0	0	0	0	0	0	0	0	0	0	0	0	0	0	0	0	0	0	0	0	0	0	0	0	0	0	0	0	0	0	0	0	0	0	0	0	0	0	0	0
1022191104	0	300000	700000
1022220059	340000	170000	550000	370000	70000	20000	10000	150000	500000	190000	270000	150000	230000	160000	190000	390000	0	320000	460000	30000	280000	530000	500000	500000	0	70000	0	0	0	0	0	0	0	0	0	0	0	0	0	0	0	0	0	0	0	0	0	0	0
1022248648	0	300000	580000	0	0	0	0	0	0	0	0	0	10000
10620473	0	300000	960000	0	0	0	0	0	0	0	0	0	300000
10976378	490000	340000	1040000	0	0	0	0	200000	720000	0	540000	250000	460000	260000	160000	640000	430000	0	780000	170000	630000	650000	0	0	0	340000	0	0	0	0	0	0	0	0	420000	10000	0	0	0	0	0	0	0	0	0	0	0	0	0
11254095	0	310000	410000
1657112	0	220000	820000	220000	150000	320000	310000	0	0	0	0	0	370000	130000	210000	0	0	0	0	0	0	0	0	0	0	0	0	0	0	0	0	0	0	0	0	0	0	0	0	0	0	0	0	0	0	0	0	0	0
2062085	130000	370000	1000000	20000	20000	20000	30000	80000	270000	50000	430000	280000	710000	50000	70000	110000	100000	430000	750000	200000	620000	1430000	810000	870000	220000	500000	450000	0	0	0	0	0	0	0	1660000	1460000	0	0	0	0	0	0	0	0	0	0	0	0	0
2128451	0	310000	730000
4122363	420000	310000	1470000	0	0	0	0	0	0	0	0	270000	510000
4224355	0	300000	1200000	380000	0	0	10000	190000	820000	350000	0	110000	780000	0	370000	0	0	0	0	330000	210000	0	0	0	0	0	0	0	0	0	0	0	0	0	240000	30000	140000	900000	1490000	2210000	50000	600000	90000	0	1510000	250000	1120000	570000	60000
4973095	0	0	30000
5422156	850000	430000	1340000	310000	0	0	0	0	0	10000	0	280000	530000	270000	330000	0	0	0	0	0	0	0	0	0	0	0	0	0	0	0	0	0	0	0	0	0	0	0	0	0	0	0	0	0	0	0	0	0	0
5531009	0	310000	220000
6658512	70000	330000	50000	0	0	0	0	0	0	0	0	60000	20000	290000	270000	0	0	0	40000	30000	610000	40000	30000	700000	10000	40000	0	0	0	0	0	0	0	0	10000	30000	0	0	0	0	0	0	0	50000	0	0	0	0	0
9434197	420000	290000	950000	0	0	0	0	0	0	0	0	260000	480000	240000
9494595	350000	170000	700000	200000	130000	290000	250000	130000	470000	250000	210000	160000	310000	160000	350000	430000	250000	260000	430000	120000	380000	540000	450000	320000	0	0	0	0	0	0	0	0	0	0	0	0	0	0	0	0	0	0	0	0	0	0	0	0	0
1015079207	760000	310000	970000	320000	0	0	0	0	0	330000	0	270000	460000	310000	320000	0	0	0	0	0	0	0	0	0	0	0	0	0	0	0	0	0	0	0	0	0	0	0	0	0	0	0	0	0	0	0	0	0	0
1015103069	610000	300000	1580000	0	0	0	0	0	200000	360000	330000	270000	490000	260000	90000	50000	440000	100000	760000	180000	570000	390000	0	0	0	0	0	0	0	0	0	0	0	0	0	0	0	0	0	0	0	0	0	0	0	0	0	0	0
1015452176	0	310000	610000
1016284301	840000	0	840000	240000	0	0	0	0	0	20000	0	560000	540000	250000	20000
1017119127	220000	20000	10000	0	30000	0	0	300000	860000	340000	0	0	0	390000	180000	580000	50000	0	0	0	0	0	0	0	0	0	0	0	0	0	0	0	0	0	0	0	0	0	0	0	0	0	0	0	0	0	0	0	0
1018347208	0	300000	330000
1018371911	340000	170000	610000	170000	130000	240000	170000	110000	0	0	270000	150000	240000	160000	170000	340000	250000	320000	490000	100000	320000	530000	380000	420000	150000	310000	330000	160000	240000	370000	420000	390000	160000	290000	590000	800000	0	0	370000	700000	690000	260000	880000	160000	0	160000	310000	300000	220000
1019008171	600000	320000	960000	180000	0	0	0	0	0	380000	0	270000	460000	270000	330000	0	0	0	740000	0	20000	950000	790000	810000	0	480000	0	0	0	0	0	0	0	0	980000	20000	0	0	0	0	0	0	0	0	0	0	0	0	0
1019189591	320000	190000	600000	120000	0	0	0	0	260000	210000	0	140000	300000	170000	160000	0	0	0	0	0	40000	240000	0	0	0	180000	0	310000	200000	130000	0	200000	140000	10000	0	0	0	0	0	0	0	0	0	20000	0	0	0	0	0
1019360374	650000	310000	1080000	10000	0	0	0	0	0	30000	0	360000	560000	220000	150000
1019404751	620000	30000	10000	200000	50000	60000	160000	0	0	10000	0	250000	130000	60000	40000	0	0	0	380000	170000	510000	670000	440000	270000	0	40000	0	0	0	0	0	0	0	0	0	0	100000	430000	0	0	0	0	0	1120000	470000	310000	170000	0	20000
1019566888	0	300000	960000	0	0	0	0	0	0	0	0	60000	460000
1019826667	0	0	350000
1019861138	0	290000	630000
1019918836	620000	310000	890000	310000	0	0	0	0	0	0	0	270000	470000	270000	320000	0	0	0	0	0	0	0	0	0	0	0	0	0	0	0	0	0	0	0	0	0	0	0	0	0	0	0	0	0	0	0	0	0	0
1019941900	0	180000	430000
1020011247	430000	330000	830000	260000	0	0	0	220000	530000	0	360000	270000	370000	210000	260000	480000	300000	290000	510000	120000	410000	520000	0	0	0	0	0	0	0	0	0	0	0	0	0	0	0	0	0	0	0	0	0	0	0	0	0	0	0
1020281440	10000	0	560000	20000	0	0	40000	0	290000	290000	0	20000	120000	150000	140000	0	0	0	0	110000	70000	0	0	0	0	0	0	0	0	0	0	0	0	0	0	0	0	0	0	0	0	0	0	0	0	0	0	0	0
1020392526	0	300000	290000	0	0	0	0	0	0	30000	0	0	0	0	0	0	0	0	0	0	0	0	0	0	0	0	0	0	0	0	0	0	0	0	0	0	0	0	0	0	0	0	0	0	0	0	0	0	0
1020521034	610000	310000	960000	0	0	0	0	0	0	0	0	260000	470000	270000	190000
1020526185	0	0	10000	0	0	0	0	0	0	0	0	0	0	0	0	0	0	0	0	0	0	0	0	0	0	0	0	0	0	0	0	0	0	0	0	0	0	0	0	0	0	0	0	0	0	0	0	0	0
1020550753	0	300000	720000
1020588244	0	150000	10000	0	0	0	0	0	0	0	0	0	0	0	0	0	0	0	0	0	0	0	0	0	0	0	0	0	0	0	0	0	30000
1020762624	0	540000	350000
1020850099	0	260000	1010000	0	0	0	0	0	0	0	0	0	210000
1021147877	0	160000	90000	100000	0	0	0	0	0	230000	0	0	10000	0	190000	0	0	0	440000	130000	570000	0	0	0	0	0	0	0	0	0	0	0	0	0	0	0	0	0	0	0	0	0	0	740000	600000	0	0	0	0
1021190848	0	280000	540000
1021194712	590000	10000	1230000	0	0	90000	100000	0	220000	160000	0	260000	450000	270000	20000	0	0	0	0	0	0	0	0	0	0	0	0	0	0	0	0	0	0	0	0	0	0	0	0	0	0	0	0	0	0	0	0	0	0
1021213495	0	300000	1300000	0	0	0	0	0	0	0	0	0	650000
1021420828	0	40000	780000
1021502663	650000	60000	20000	0	0	0	0	0	0	0	0	270000	550000	260000
1021545802	0	310000	380000
1021576503	320000	330000	680000	40000	0	0	0	0	0	0	0	190000	270000	190000	270000
1021590800	600000	230000	1030000	330000	0	0	0	0	20000	330000	0	270000	500000	20000	310000	0	0	0	0	0	0	0	0	0	0	0	0	0	0	0	0	0	0	0	0	0	0	0	0	0	0	0	0	0	0	0	0	0	0
1021655923	590000	330000	880000	300000	70000	0	0	0	30000	310000	0	280000	460000	270000	310000	0	0	710000	710000	150000	600000	240000	0	0	0	0	0	0	0	0	0	0	0	0	0	0	0	0	0	0	0	0	0	0	0	0	0	0	0
1021681256	0	320000	360000	0	0	0	0	0	320000	280000	0	0	0	0	50000	0	0	0	390000	70000	270000	920000	660000	400000	0	260000	0	150000	0	160000	0	0	130000	20000	480000	70000	120000	270000	0	0	0	0	0	20000	1430000	0	0	0	0
1021684941	0	400000	340000	0	0	0	0	0	0	0	0	0	0	0	0	0	0	0	0	0	0	0	0	0	0	0	0	250000	0	0	0	0	510000
1021764133	0	40000	30000
1021783383	0	320000	360000
1021818160	750000	310000	980000	30000	0	0	0	170000	390000	180000	270000	270000	520000	280000	220000	440000	230000	220000	0	0	0	0	0	0	0	0	0	0	0	0	0	0	0	0	0	0	0	0	0	0	0	0	0	0	0	0	0	0	0
1022049217	0	310000	970000	0	0	0	0	0	0	0	0	0	10000
1022156379	0	310000	360000
1022164992	0	300000	320000	0	0	0	0	0	0	0	0	0	0	0	0	0	0	0	740000	170000	610000	90000
1022222104	640000	400000	1090000	10000	0	0	0	0	0	10000	10000	350000	550000	270000	310000	0	0	10000	0	0	0	0	0	0	0	0	0	0	0	0	0	0	0	0	0	0	0	0	0	0	0	0	0	0	0	0	0	0	0
1022263277	0	330000	1010000
1022310148	1290000	500000	1250000	210000	0	0	0	0	0	370000	0	350000	550000	230000	310000	0	0	0	750000	110000	530000	30000	0	0	0	0	0	0	0	0	0	0	0	0	0	0	0	0	0	0	0	0	0	0	0	0	0	0	0
10538827	520000	340000	830000	250000	140000	340000	390000	0	60000	350000	0	240000	460000	220000	260000	0	0	0	0	0	0	0	0	0	0	0	0	0	0	0	0	0	0	0	0	0	0	0	0	0	0	0	0	0	0	0	0	0	0
10712113	40000	670000	430000	30000	60000	50000	90000	160000	90000	360000	210000	60000	240000	360000	470000	120000	270000	90000	40000	210000	220000	60000	80000	40000	50000	210000	50000	440000	250000	40000	90000	630000	970000	380000	130000	60000	10000	0	0	0	0	0	0	90000	350000	90000	0	0	0
11349123	590000	290000	960000	280000	0	0	0	0	640000	330000	0	260000	460000	230000	310000	0	0	0	0	0	0	0	0	0	0	0	0	0	0	0	0	0	0	0	0	0	0	0	0	0	0	0	0	0	0	0	0	0	0
11962197	10000	280000	1120000	0	0	0	0	0	0	0	0	310000	530000	0	10000	0	0	0	0	180000	630000	0	0	0	0	510000	0	0	0	0	0	0	0	0	970000	200000	0	0	0	0	0	0	0	0	0	0	0	0	0
12589018	410000	200000	660000	0	0	0	0	130000	520000	250000	290000	190000	310000	190000	30000	470000	310000	290000	530000	120000	420000	630000	540000	550000	160000	320000	420000	200000	170000	440000	370000	40000	200000	290000	670000	1000000	0	0	0	0	0	0	0	0	0	0	0	0	0
12853021	0	300000	210000
1914302	0	240000	600000	240000	120000	250000	230000	130000	390000	220000	0	0	190000	0	230000	350000	0	0	380000	20000	0	470000	400000	800000	0	440000	0	240000	130000	620000	350000	320000	210000	490000	1230000	30000	70000	260000	0	0	0	350000	0	0	680000	0	0	0	0
2467423	160000	300000	910000	300000	0	0	0	0	10000	0	0	120000	140000	260000	330000
2820776	740000	310000	980000	0	0	0	0	0	0	0	0	450000	460000	350000	160000
3564475	0	50000	40000	0	0	0	0	30000	290000	40000	210000	0	30000	0	0	350000	230000	230000	0	0	0	0	0	0	0	0	0	0	0	0	0	0	0	0	0	0	0	0	0	0	0	0	0	0	0	0	0	0	0
4665715	600000	350000	960000	80000	0	0	0	0	0	60000	0	260000	480000	260000	360000
4694601	0	300000	970000	0	0	0	0	0	0	0	0	0	10000
6077815	0	250000	600000
8090548	0	370000	980000	0	0	0	0	0	0	0	0	0	230000	0	30000	0	0	0	0	40000	0	0	0	0	0	0	0	0	0	0	0	0	0	0	0	0	0	0	0	0	0	0	0	0	0	0	0	0	0
8534190	0	300000	140000
9574072	600000	320000	1160000	300000	320000	500000	460000	130000	220000	390000	370000	280000	470000	280000	320000	0	420000	520000	750000	210000	690000	970000	790000	840000	270000	520000	680000	380000	240000	760000	620000	500000	280000	460000	1010000	1450000	110000	520000	0	0	0	0	0	1040000	1450000	50000	0	0	0
9688384	30000	230000	800000	0	0	0	0	0	0	0	0	180000	310000
9793868	0	630000	1570000
12983323	750000	10000	0	310000	70000	20000	20000	170000	260000	540000	90000	370000	0	440000	310000	730000	440000	510000	290000	170000	680000	0	0	0	0	0	0	0	0	0	0	0	0	0	0	0	100000	810000	0	0	0	0	0	920000	1690000	0	0	0	0
2540558	230000	0	0	330000	120000	340000	290000	0	400000	190000	0	0	0	270000	350000	0	0	180000	380000	120000	420000	0	0	0	0	0	0	0	0	0	0	0	0	0	0	0	0	0	0	0	0	0	0	0	0	0	0	0	0
5834543	0	200000	0	0	160000	330000	330000	170000	510000	250000	250000	0	0	0	0	510000	120000	310000	560000	110000	460000	650000	550000	570000	150000	410000	530000	220000	0	130000	0	0	240000	0	720000	1050000	0	0	0	0	0	0	0	0	0	0	0	0	0
1019635832	550000	0	0	310000	170000	470000	410000	200000	530000	330000	380000	260000	370000	270000	320000	370000	420000	1190000	740000	170000	600000	900000	750000	130000	0	0	0	0	0	0	0	0	0	0	0	0	0	0	0	0	0	0	0	0	0	0	0	0	0
1019958333	0	10000	0	0	130000	260000	230000	110000	390000	170000	0	0	0	0	0	350000	220000	0	0	0	0	0	0	0	0	0	0	0	0	0	0	0	0	0	0	0	0	0	0	0	0	0	0	0	0	0	0	0	0
1022169311	20000	50000	0	10000	20000	140000	50000	20000	90000	30000	80000	10000	0	40000	20000	20000	170000	170000	0	0	0	0	0	0	0	0	0	0	0	0	210000	0	0	0	0	0	0	0	0	0	0	0	0	0	0	0	0	0	0
10708262	310000	0	0	180000	120000	270000	230000	130000	390000	180000	200000	140000	230000	140000	170000	340000	210000	10000	0	0	0	0	0	0	0	0	0	0	0	0	0	0	0	0	0	0	0	0	0	0	0	0	0	0	0	0	0	0	0
1950625	0	0	0	310000	210000	490000	440000	0	0	20000	0	0	0	0	320000	0	0	0	0	0	0	0	0	0	0	0	0	0	0	0	0	0	0	0	0	0	0	0	0	0	0	0	0	0	0	0	0	0	0
971298	0	0	0	0	140000	320000	280000	170000	640000	220000	90000	0	0	0	10000	540000	340000	0	80000	20000	20000	280000	0	1070000	170000	400000	500000	240000	0	30000	0	0	220000	0	460000	1180000	0	0	0	160000	0	0	0	0	120000	0	0	0	0
1020326482	0	0	0	0	0	50000
11477646	0	10000	0	530000	210000	460000	440000	0	0	20000	400000	0	0	0	310000	0	440000	430000	10000	30000	10000	0	760000	900000	220000	480000	80000	0	370000	0	1060000	550000	0	0	1040000	1620000	110000	520000	0	0	0	0	0	1790000	1430000	0	0	0	0
1020697989	90000	10000	0	310000	360000	830000	330000	230000	790000	320000	400000	90000	0	20000	310000	720000	460000	480000	680000	170000	670000	930000	810000	450000	230000	20000	780000	470000	250000	870000	630000	630000	270000	630000	940000	1300000	0	0	0	0	0	0	0	0	0	0	0	0	0
5834205	0	0	0	350000	210000	470000	350000	200000	770000	80000	360000	0	0	0	360000	660000	430000	440000	0	0	0	0	0	0	0	0	0	0	0	0	0	0	0	0	0	0	0	0	0	0	0	0	0	0	0	0	0	0	0
1020965874	0	80000	0	0	0	60000	0	0	0	0	0	0	0	260000	40000
1021296182	0	0	0	0	0	60000	60000	210000	760000	250000	0	0	0	0	0	180000	10000	170000	0	0	0	100000	800000	790000	0	0	0	0	0	0	0	0	0	0	0	0	110000	430000	0	0	0	0	0	0	1510000	10000	0	0	0
1021681498	0	0	0	220000	200000	10000	0	0	0	0	0	0	0	0	210000	0	0	0	0	0	0	0	0	0	0	0	0	270000	110000	430000	480000	0	20000	300000	0	0	0	0	0	0	0	0	0	0	0	0	0	0	0
2896816	0	0	0	310000	280000	480000	450000	200000	230000	330000	0	0	0	10000	310000	120000	0	0	0	160000	70000	0	0	0	0	0	0	0	0	0	0	0	0	0	0	0	40000	1050000	0	0	150000	10000	0	920000	60000	220000	0	0	0
4414797	0	0	0	440000	190000	290000	10000	0	0	0	0	0	0	0	90000	0	0	0	0	0	0	0	0	0	0	0	0	0	0	0	0	0	0	0	0	0	0	0	0	0	0	0	0	0	0	0	0	0	0
9558122	0	10000	0	0	320000	490000	150000	0	0	0	0	0	0	10000	0	0	0	0	0	0	0	0	0	0	0	0	0	0	0	0	0	0	0	0	0	0	0	0	0	0	0	0	0	0	0	0	0	0	0
1018771213	0	10000	0	260000	0	0	0	200000	820000	500000	450000	0	0	30000	280000	790000	430000	490000	0	300000	40000	0	0	0	0	0	0	0	0	0	0	0	0	0	0	0	0	0	0	0	0	0	0	0	0	0	0	0	0
1019747576	0	0	0	0	0	0	0	60000	430000	0	0	0	0	0	0	10000	0	0	0	0	20000	0	0	0	0	0	0	0	0	0	0	0	0	0	0	0	0	0	0	0	0	0	0	0	0	0	0	0	0
1022030359	0	300000	0	0	0	0	0	250000	420000	330000	0	0	0	0	140000	750000	0	0	0	0	0	0	0	0	0	0	0	0	0	0	0	0	0	0	0	0	0	0	0	0	0	0	0	0	0	0	0	0	0
3315203	0	0	0	0	0	0	0	230000	0	0	380000	0	0	0	0	700000	430000	400000	120000	140000	510000	0	530000	710000	210000	430000	550000	360000	220000	560000	460000	410000	10000	430000	820000	1410000	110000	440000	500000	0	0	0	900000	250000	0	230000	470000	0	310000
9187569	0	0	0	0	0	0	0	240000	0	0	310000	30000	0	0	0	660000	40000	790000	760000	190000	680000	1280000	440000	80000	330000	0	640000	0	0	0	0	0	20000	0	10000	1910000	110000	510000	1350000	1240000	0	490000	0	1020000	1580000	310000	1200000	200000	750000
1020774142	0	0	0	0	0	0	0	200000	150000	0	310000	0	0	0	0	490000	260000	320000	460000	100000	480000	170000	0	0	0	320000	0	150000	0	80000	0	0	110000	0	30000	0	0	0	0	0	0	0	0	0	0	0	0	0	0
1021685621	0	80000	0	0	0	0	0	150000	540000	380000	0	0	0	0	0	150000	0	0	0	0	0	0	0	0	0	0	0	0	0	0	0	0	0	0	0	0	0	0	0	0	0	0	0	0	0	0	0	0	0
1855483	0	0	0	0	0	0	0	30000	0	0	0	0	0	0	0	0	0	0	0	0	0	0	0	0	0	0	0	0	0	0	0	0	0	0	0	0	0	0	0	0	0	0	0	0	0	0	0	0	0
1893081	0	0	0	20000	0	0	0	190000	920000	520000	0	0	0	0	0	650000	0	0	0	0	0	0	0	0	0	0	0	0	0	0	0	0	0	0	0	0	0	0	0	0	0	0	0	0	0	0	0	0	0
1017830065	0	0	0	0	0	0	0	10000	0	40000	0	0	0	0	0	0	0	10000	0	110000	0	0	0	0	0	0	0	0	0	0	0	0	0	0	0	0	0	0	0	0	0	0	0	0	0	0	0	0	0
1019542575	0	0	0	0	0	0	0	280000	0	0	360000	0	0	0	0	630000	430000	430000	0	0	0	0	0	0	0	0	0	0	0	0	0	0	0	0	0	0	0	0	0	0	0	0	0	0	0	0	0	0	0
1021598470	0	20000	0	0	0	0	0	210000	830000	280000	360000	0	0	0	0	660000	440000	570000	0	170000	210000	0	0	0	0	0	0	0	0	0	0	0	0	0	0	0	0	0	0	0	0	0	0	0	0	0	0	0	0
1019901757	0	50000	0	0	0	0	0	10000	10000	0	0	0	0	0	10000	0	0	20000
1020894279	0	0	0	0	0	0	0	30000	60000	0	0	0	0	0	0	0	0	0	0	0	0	0	0	0	0	0	0	0	0	0	0	0	0	0	0	0	0	0	0	0	0	0	0	0	0	0	0	0	0
1021591841	0	70000	0	20000	0	0	0	140000	470000	320000	200000	0	0	50000	200000	350000	230000	180000	10000	40000	230000	360000	290000	140000	0	0	0	0	0	0	0	0	0	0	0	0	0	0	0	0	0	0	0	0	0	0	0	0	0
1021830283	0	0	0	0	0	0	0	270000	1050000	370000	280000	0	0	0	0	1020000	430000	0	0	0	0	0	0	0	0	0	0	0	0	0	0	0	0	0	0	0	0	0	0	0	0	0	0	0	0	0	0	0	0
11768612	0	0	0	0	0	0	0	10000	10000	20000	0	0	0	0	0	20000	0	0	0	0	0	0	0	0	0	0	0	0	0	0	0	0	0	0	0	0	0	0	0	0	0	0	0	0	0	0	0	0	0
1015028954	490000	240000	0	0	0	0	10000	30000	60000	10000	40000	210000	20000	110000	0	60000	30000	0	0	0	0	0	0	0	0	0	0	0	0	0	0	0	0	0	0	0	0	0	0	0	0	0	0	0	0	0	0	0	0
1015518237	0	0	0	0	0	0	0	70000
1015664017	0	0	0	0	0	0	0	50000	410000	80000	300000	0	0	0	0	30000	20000	10000	0	0	10000	0	0	0	0	0	0	0	0	0	0	0	0	0	0	0	0	0	0	0	0	0	0	0	0	0	0	0	0
1021275791	0	10000	0	0	0	0	0	10000	600000	320000	0	0	0	0	0	670000	70000	0	780000	140000	600000	180000	0	0	0	0	0	0	0	0	0	0	0	0	0	0	0	0	0	0	0	0	0	0	0	0	0	0	0
11614361	970000	0	0	430000	0	0	30000	200000	730000	470000	340000	670000	0	170000	420000	130000	410000	340000	80000	170000	650000	0	0	0	0	0	0	0	0	0	0	0	0	0	0	0	230000	280000	0	0	0	0	0	1330000	1700000	0	0	0	0
1016432429	0	0	0	310000	0	0	0	90000	580000	380000	0	0	0	270000	310000	0	0	0	0	160000	20000	0	0	0	0	0	0	0	0	0	0	0	0	0	0	0	0	0	0	0	0	0	0	0	0	0	0	0	0
1020451230	0	0	0	0	0	0	0	200000	110000	300000	90000	0	0	0	10000	660000	340000	0	0	0	0	0	0	0	210000	0	650000	300000	0	470000	0	0	290000	0	0	1410000	0	0	0	0	0	0	0	0	0	0	0	0	0
1020661745	380000	0	0	170000	0	0	0	120000	400000	180000	210000	220000	350000	190000	220000	390000	170000	230000	0	0	0	0	0	0	0	0	0	0	0	0	0	0	0	0	0	0	0	0	0	0	0	0	0	0	0	0	0	0	0
1020745964	0	10000	0	0	0	0	0	110000	690000	310000	0	0	0	0	0	40000	0	0	100000	100000	470000	0	0	0	0	0	0	0	0	0	0	0	0	0	0	0	0	0	0	0	0	0	0	0	0	0	0	0	0
1021547424	0	0	0	0	0	0	0	210000	960000	330000	0	0	0	0	0	640000	370000	0	0	0	0	0	0	0	0	0	0	0	0	0	0	0	0	0	0	0	0	0	0	0	0	0	0	0	0	0	0	0	0
1139428	0	60000	0	0	0	0	0	230000	420000	440000	0	0	0	0	0	950000	460000	0	1340000	200000	660000	1120000	170000	0	20000	470000	0	590000	250000	760000	800000	810000	450000	520000	1340000	1830000	10000	20000	0	1970000	850000	460000	1050000	2000000	1590000	860000	860000	610000	690000
1020346773	0	0	0	0	0	0	0	220000	810000	20000	440000	0	0	0	0	770000	430000	550000	0	250000	0	0	0	0	0	0	600000	270000	0	750000	240000	0	290000	430000	0	0	0	0	0	0	0	0	0	0	0	0	0	0	0
1021418019	30000	50000	0	300000	0	0	0	200000	720000	320000	410000	0	0	20000	290000	650000	420000	420000	0	20000	0	0	0	0	0	0	0	0	0	0	0	0	0	0	0	0	0	0	0	0	0	0	0	0	0	0	0	0	0
1021500307	0	0	0	0	0	0	0	30000	40000	360000	940000	0	0	0	0	610000	540000	60000	0	0	0	0	0	0	0	0	0	0	0	0	0	0	0	0	0	0	0	0	0	0	0	0	0	0	0	0	0	0	0
1021996366	0	0	0	0	0	0	0	220000	50000	150000	490000	0	0	0	0	190000	380000	520000	0	0	0	0	0	0	280000	80000	200000	0	0	0	0	0	0	0	850000	1250000	0	0	0	0	0	0	0	700000	770000	210000	510000	0	0
3634906	0	10000	0	0	0	0	0	210000	540000	160000	470000	0	0	0	0	850000	810000	540000	540000	100000	780000	640000	400000	60000	170000	20000	140000	240000	140000	390000	460000	250000	150000	220000	580000	670000	0	0	710000	1070000	580000	310000	1130000	0	0	20000	0	450000	300000
1019726930	0	0	0	0	0	0	0	200000	0	0	360000	0	0	0	0	520000	430000	420000	740000	170000	610000	0	0	0	0	0	0	0	0	0	0	0	0	0	0	0	0	0	0	0	0	0	0	0	0	0	0	0	0
1020205246	0	0	0	0	0	0	0	10000	640000	340000	290000	0	0	0	330000	710000	300000	440000	0	0	0	0	0	0	0	0	0	0	0	0	0	0	0	0	0	0	0	0	0	0	0	0	0	0	0	0	0	0	0
1021740241	0	0	0	0	0	0	0	120000	250000	200000	0	0	0	0	0	380000	110000	0	20000	10000	10000	0	0	0	0	0	0	0	0	0	0	0	0	0	0	0	0	0	0	0	0	0	0	0	0	0	0	0	0
1016939774	0	250000	0	0	30000	0	0	0	280000	350000	0	0	0	0	300000	0	0	0	0	0	0	0	0	0	0	0	0	0	0	0	0	0	0	0	0	0	0	0	0	0	0	0	0	0	0	0	0	0	0
1018578768	0	0	0	0	0	0	0	0	0	210000
1019634746	0	0	0	0	0	0	0	0	0	10000	360000	0	0	0	0	0	170000	430000	740000	170000	630000	910000	770000	750000	0	0	0	0	0	0	0	0	0	0	0	0	0	0	0	0	0	0	0	0	0	0	0	0	0
1019772969	0	30000	0	0	0	0	0	0	0	190000
1020499833	0	0	0	0	0	0	0	0	0	20000
1021505492	0	0	0	0	0	0	0	0	0	340000	0	0	0	0	0	0	0	0	0	0	0	0	0	0	0	0	0	0	0	0	0	0	0	0	0	0	0	0	0	0	0	0	0	0	0	0	0	0	0
1021592823	0	20000	0	0	0	0	0	0	10000	40000	0	0	0	0	0	20000	0	0	0	0	0	0	0	0	0	0	0	0	0	0	0	0	0	0	0	0	0	0	0	0	0	0	0	0	0	0	0	0	0
1021647257	0	0	0	0	0	0	0	0	10000	40000	0	0	0	0	0	0	0	0	0	10000	10000	0	0	0	0	0	0	0	0	0	0	0	0	0	0	0	0	0	0	0	0	0	0	0	0	0	0	0	0
1022273066	0	50000	0	0	0	0	0	0	310000	320000	0	0	0	0	0	0	0	0	0	0	0	0	0	0	0	0	0	0	0	0	0	0	0	0	0	0	0	0	0	0	0	0	0	0	0	0	0	0	0
1939120	590000	0	0	210000	0	0	0	0	350000	390000	0	250000	340000	150000	290000	0	0	0	0	0	0	0	0	0	0	0	0	0	0	0	0	0	0	0	0	0	0	0	0	0	0	0	0	0	0	0	0	0	0
3631024	0	0	0	0	0	0	0	0	0	10000	0	0	0	0	0	30000
4541351	0	0	0	0	0	0	0	0	0	590000	0	0	0	0	0	0	0	0	0	0	0	0	0	0	0	0	0	0	0	0	0	0	0	0	0	0	0	0	0	0	0	0	0	0	0	0	0	0	0
5504863	0	0	0	0	0	0	0	0	0	20000	0	0	0	0	0	0	0	0	940000	100000	680000	1030000	30000	0	210000	510000	630000	0	0	0	0	0	10000	0	1550000	320000
9671866	0	0	0	0	0	0	0	0	0	280000
1019419706	0	10000	0	0	0	0	0	0	0	50000	0	0	0	0	0	0	0	0	0	0	0	0	0	0	0	0	0	0	0	0	0	0	0	0	0	0	0	0	0	0	0	0	860000	0	0	0	0	0	0
1019635636	0	0	0	0	0	0	0	0	0	20000
1019731952	0	0	0	0	0	0	0	0	0	80000
1020231872	0	290000	0	0	0	0	0	0	0	10000	0	0	0	0	0	0	0	0	0	0	0	0	0	0	0	0	0	0	0	0	0	0	0	0	0	0	0	0	0	0	0	0	0	0	0	0	0	0	0
1020243037	0	0	0	0	0	0	0	0	0	60000
1020531325	0	270000	0	80000	0	0	0	0	0	40000	0	0	0	0	310000	0	0	0	0	0	0	0	0	0	0	0	0	0	0	0	0	0	0	0	0	0	0	0	0	0	0	0	0	0	0	0	0	0	0
1021453903	0	150000	0	0	0	0	0	0	0	190000	0	0	0	0	0	0	0	0	0	130000	10000
1021543592	0	0	0	0	0	0	0	0	1100000	330000	0	0	0	0	0	0	0	0	0	0	0	0	0	0	0	0	0	0	0	0	0	0	0	0	0	0	0	0	0	0	0	0	0	0	0	0	0	0	0
1021721855	0	40000	0	10000	0	0	0	0	0	220000	0	0	0	0	190000	0	0	0	0	140000	20000	0	0	0	0	0	0	0	0	0	0	0	0	0	0	0	70000	430000	0	0	0	0	0	580000	1350000	0	0	0	0
5775066	0	0	0	0	0	0	0	0	0	10000
6307639	0	0	0	0	0	0	0	0	0	330000	0	0	0	0	0	0	0	0	0	0	0	0	0	0	0	0	0	0	0	0	0	0	0	0	0	0	0	0	0	0	0	0	0	0	0	0	0	0	0
1018221079	0	0	0	0	0	0	0	0	10000	260000	0	0	0	0	0	0	0	180000	0	20000	0	0	0	10000	0	0	0	0	0	0	0	0	0	0	0	0	90000	10000	0	0	0	0	0	0	10000	0	0	0	0
1018852262	0	0	0	0	0	0	0	0	360000	330000	0	0	0	0	0	0	0	0	0	20000	0	0	0	0	0	0	0	0	0	0	0	0	0	0	0	0	0	0	0	0	0	0	0	0	0	0	0	0	0
1019698379	0	0	0	0	0	0	0	0	0	20000	0	0	0	0	0	0	0	0	0	0	0	0	0	0	0	0	0	0	0	0	0	0	0	0	0	0	0	0	0	0	0	0	0	0	0	0	0	0	0
1020395474	0	130000	0	0	0	0	0	0	10000	40000	0	0	0	0	0	0	0	0	0	0	0	0	0	0	0	0	0	0	0	0	0	0	0	0	0	0	0	0	0	0	0	0	0	20000	0	0	0	0	0
1020536244	0	0	0	0	0	0	0	0	60000	330000	0	0	0	0	0	0	0	0	0	0	0	0	0	0	0	0	0	370000	0	440000	0	0	150000	0	0	0	120000	520000	0	0	0	0	0	900000	1090000	310000	170000	0	0
1020548869	0	0	0	0	0	0	0	0	0	200000	0	0	0	0	0	0	0	0	0	0	0	0	0	0	0	0	0	0	0	0	0	0	0	0	0	0	0	0	0	0	0	0	0	0	0	0	0	0	0
1021288454	0	0	0	0	0	0	0	0	0	370000	0	0	0	0	0	0	0	0	0	0	0	0	0	0	0	0	0	0	0	0	0	0	0	0	0	0	0	0	0	0	0	0	0	0	0	0	0	0	0
1021765359	0	0	0	0	0	0	0	0	0	150000	0	0	0	0	0	0	0	0	0	90000	0	0	0	0	0	0	0	0	0	0	0	0	0	0	0	0	0	0	90000	0	170000	400000	0	0	0	290000	560000	0	380000
1021788745	0	0	0	0	0	0	0	0	0	30000
1021939932	0	0	0	0	0	0	0	0	0	180000	0	0	0	0	0	0	0	0	0	0	0	0	0	0	0	0	0	0	0	0	0	0	0	0	0	0	0	0	0	0	0	0	0	0	0	0	0	0	0
10368940	20000	0	0	310000	0	0	0	0	0	70000	0	0	0	270000	300000	0	0	0	0	0	0	0	0	0	0	0	0	0	0	0	0	0	0	0	0	0	0	0	0	0	0	0	0	0	0	0	0	0	0
1588531	0	0	0	0	0	0	0	0	330000	650000	0	0	0	0	0	0	0	0	0	0	0	0	0	0	0	0	0	0	0	0	0	0	0	0	0	0	0	0	0	0	0	0	0	440000	0	0	0	0	0
5413880	0	100000	0	0	0	0	0	0	0	30000	0	0	0	0	0	0	0	0	0	110000	0	0	0	0	0	160000
1017714465	0	90000	0	0	0	0	0	0	0	250000	0	0	0	0	0	0	0	0	0	0	0	0	0	0	0	0	0	0	0	0	0	0	0	0	0	0	0	0	0	0	0	0	0	0	0	0	0	0	0
1018346904	0	20000	0	0	0	0	0	0	0	20000
1019152838	0	0	0	0	0	0	0	0	170000	350000	290000	0	0	0	0	20000	20000	40000	380000	140000	350000	460000	20000	410000	0	0	0	0	0	0	0	0	0	0	0	0	0	0	0	0	0	0	0	0	0	0	0	0	0
1020032561	0	0	0	0	0	0	0	0	0	70000	10000	0	0	0	0	0	30000	280000	980000	190000	870000	990000	410000
1021054799	0	0	0	0	0	0	0	0	0	60000
1021073961	0	0	0	0	0	0	0	0	0	50000	0	0	0	0	0	0	0	0	0	0	0	0	0	0	0	0	0	0	0	0	0	0	0	0	0	0	0	0	0	0	0	0	0	0	0	0	0	0	0
1021193399	0	40000	0	0	0	0	0	0	90000	80000	0	0	0	0	0	0	0	0	60000	30000	0	0	0	0	0	640000	0	0	0	40000	0	0	40000	80000	830000	20000	0	0	0	0	0	0	0	0	0	0	0	0	0
1021450887	0	0	0	0	0	0	0	0	530000	330000	0	0	0	0	0	0	0	0	0	0	0	0	0	0	0	0	0	0	0	0	0	0	0	0	0	0	110000	40000	0	0	0	0	0	940000	1490000	310000	560000	0	230000
1021699864	0	0	0	0	0	0	0	0	0	10000	0	0	0	0	0	0	0	0	0	0	0	0	0	0	0	0	0	0	0	0	0	0	0	0	0	0	0	0	0	0	0	0	0	0	0	0	0	0	0
1021761563	0	0	0	0	0	0	0	0	0	30000
1021816049	0	0	0	0	0	0	0	0	20000	340000	0	0	0	0	0	0	0	0	0	0	0	0	0	0	0	0	0	0	0	0	0	0	0	0	0	0	0	0	0	0	0	0	0	0	0	0	0	0	0
1021986579	0	260000	0	0	0	0	0	0	0	270000	0	0	0	0	0	0	0	0	0	0	0	0	0	0	0	0	0	0	0	0	0	0	0	0	0	0	0	0	0	0	0	0	0	0	0	0	0	0	0
7762923	0	50000	0	0	0	0	0	0	0	300000	310000	0	0	0	0	20000	0	10000	280000	110000	100000	0	0	0	0	0	0	0	0	0	0	0	0	0	0	0	0	0	0	0	0	0	0	0	0	0	0	0	0
1018038381	0	0	0	0	0	0	0	0	0	220000	0	0	0	0	10000	0	0	0	0	0	0	0	0	0	160000	350000	320000	0	0	0	0	0	0	0	760000	1140000
1019655389	0	0	0	0	0	0	0	0	0	110000
1019975995	0	0	0	0	0	0	0	0	0	10000
1020576381	0	0	0	0	0	0	0	0	0	20000
1020713625	0	0	0	0	0	0	0	0	20000	20000	0	0	0	0	0	0	0	0	0	0	0	0	0	0	0	0	0	0	0	0	0	0	0	0	0	0	0	0	0	0	0	0	0	0	0	0	0	0	0
1020849926	0	0	0	390000	160000	0	0	0	0	10000	0	0	0	0	130000	0	0	0	0	0	0	0	0	0	370000	40000	490000	260000	150000	770000	510000	610000	360000	390000	160000	1880000	0	0	0	0	0	0	0	640000	570000	0	0	0	0
1021424599	0	0	0	0	0	0	0	0	30000	330000	0	0	0	0	0	0	0	0	0	0	0	0	0	0	0	0	0	0	0	0	0	0	0	0	0	0	0	0	0	0	0	0	0	0	0	0	0	0	0
1021447765	0	0	0	0	0	0	0	0	0	20000	0	0	0	0	0	0	0	0	0	0	0	0	0	0	0	0	0	0	0	0	0	0	0	0	0	0	0	0	0	0	0	0	0	0	0	0	0	0	0
1021712560	0	0	0	0	0	0	0	0	0	80000
1022283737	0	0	0	0	0	0	0	0	0	340000	0	0	0	0	0	0	0	0	0	0	0	0	0	0	0	0	0	0	0	0	0	0	0	0	0	0	0	0	0	0	0	0	0	0	0	0	0	0	0
1022303675	0	0	0	0	0	0	0	0	0	190000
1016672892	0	10000	0	0	0	0	0	0	0	10000
1019757707	0	160000	0	0	0	0	0	0	0	80000
1019796474	0	0	0	0	0	0	0	0	0	10000	0	0	0	0	0	0	0	0	0	0	0	0	0	0	0	0	0	0	0	0	0	0	0	0	0	0	260000	250000	640000	370000	0	0	0	1070000	1790000	300000	620000	0	390000
1019940277	0	0	0	0	0	0	0	0	0	30000	20000	0	0	0	0	0	10000	110000	0	20000	0	0	0	0	0	0	0	0	0	0	0	0	0	0	0	0	0	0	60000	50000	40000	20000	70000	0	0	30000	40000	440000	20000
10595545	0	0	0	0	0	0	0	0	0	50000
11918617	0	0	0	0	0	0	0	0	0	20000	0	0	0	0	0	0	0	0	0	50000	0	0	0	0	0	480000	0	0	0	0	0	0	0	0	280000	0	0	0	0	0	0	0	0	0	0	0	0	0	0
4054469	0	0	0	0	0	0	20000	0	0	10000	0	0	0	0	0	0	0	0	0	0	0	0	0	0	0	0	0	0	0	0	0	0	0	0	0	0	120000	140000	820000	1390000	980000	570000	1310000	1080000	1580000	290000	560000	560000	370000
9510021	0	0	0	0	0	0	0	0	330000	390000	320000	0	0	0	0	680000	430000	340000	0	110000	0	0	0	0	0	0	0	0	0	0	0	0	0	0	0	0	0	0	0	0	0	0	0	0	0	0	0	0	0
1018880690	0	0	0	0	0	0	0	0	0	30000	0	0	0	0	0	0	0	0	0	0	0	0	0	0	0	0	0	0	0	0	0	0	0	0	0	0	0	0	0	0	0	0	0	0	0	0	0	0	0
1019291875	0	0	0	0	0	0	0	0	10000	620000	420000	0	0	0	0	0	0	140000	0	230000	0	0	0	0	0	10000	0	0	0	0	0	0	0	0	0	0	0	0	0	0	0	0	0	0	0	0	0	0	0
1020378079	0	0	0	0	0	0	0	0	0	340000	70000	0	20000	0	0	560000	150000	380000	0	10000	0	0	0	0	0	0	0	0	0	0	0	0	0	0	0	0	0	0	0	0	0	0	0	0	0	0	0	0	0
1020465070	0	130000	0	0	0	0	0	0	20000	440000	0	0	0	0	0	0	0	0	0	10000	0	0	0	0	0	0	0	0	0	0	0	0	0	0	0	0	0	0	0	0	0	0	0	0	0	0	0	0	0
1022124799	0	90000	0	0	0	0	0	0	0	10000
12424305	0	0	0	0	0	0	0	0	0	30000	0	0	0	0	0	320000	110000
4749036	0	30000	0	0	0	0	0	0	0	220000	0	0	0	0	20000	10000	0	0	920000	210000	780000	1370000	640000	0	0	30000	1100000	210000	0	10000	0	0	410000	0	0	0	40000	0	0	0	0	0	0	0	1960000	0	0	0	0
7280721	0	0	0	210000	0	0	0	0	150000	230000	0	0	0	0	30000	0	0	0	0	0	0	0	0	0	0	0	0	0	0	0	0	0	0	0	0	0	0	0	0	0	0	0	0	0	0	0	0	0	0
7322535	0	0	0	0	0	0	0	0	0	10000	0	0	0	0	0	0	0	0	380000	170000	480000	460000	380000	400000	0	240000	0	0	0	0	0	0	0	0	450000	10000
1017255865	0	0	0	0	0	0	0	0	0	550000	0	0	0	0	0	0	0	0	0	0	0	0	0	0	0	0	0	0	0	0	0	0	0	0	0	0	0	0	0	0	0	0	0	0	0	0	0	0	0
1019673005	0	30000	0	40000	0	0	0	0	0	50000	20000	0	0	0	40000	50000	40000	30000	10000	40000	20000	0	0	10000	0	30000	0	10000	30000	0	0	50000	30000	0	10000	0	10000	20000	10000	0	0	10000	10000	10000	0	90000	10000	10000	10000
1019709993	0	140000	0	0	0	0	0	0	0	300000	0	0	0	0	240000	0	0	0	0	170000	140000
1019856114	0	0	0	0	0	0	0	0	0	50000	0	0	0	0	0	0	0	0	0	0	0	0	0	0	0	0	0	0	0	0	0	0	0	0	0	0	0	0	0	0	0	0	0	0	0	0	0	0	0
1020755444	0	0	0	0	0	0	0	0	0	50000
1020757512	0	0	0	0	0	0	0	0	0	30000
1021870951	0	70000	0	0	0	0	0	0	0	10000
1022072086	0	0	0	0	0	0	0	0	0	40000	0	0	0	0	0	0	0	0	0	0	0	0	0	0	0	0	0	0	0	0	0	0	0	0	0	0	0	0	0	0	0	0	0	0	0	0	0	0	0
8044024	0	20000	0	0	0	0	0	0	0	110000
1020077861	0	0	0	0	0	0	0	0	0	0	40000	0	0	0	30000	40000	40000	20000	40000	30000	40000	30000	30000	60000	0	450000	0	0	0	0	0	0	0	0	0	0	0	0	0	0	0	0	0	0	0	0	0	0	0
10670038	0	0	0	0	0	0	0	0	0	0	70000	0	0	0	0	0	0	400000	190000	140000	490000	0	0	0	0	0	0	0	0	0	0	0	0	0	0	0	0	0	0	0	0	0	0	0	0	0	0	0	0
1021685567	0	0	0	0	0	0	0	0	0	0	0	180000	450000
1022280256	0	70000	0	0	0	0	0	0	0	0	0	20000	0	10000
10387113	620000	0	0	330000	0	0	0	0	0	0	0	280000	10000	270000	330000	0	0	0	0	0	0	0	0	0	0	0	0	0	0	0	0	0	0	0	0	0	0	0	0	0	0	0	0	0	0	0	0	0	0
1021255280	0	0	0	0	0	0	0	0	0	0	0	20000
1017120612	0	50000	0	0	0	0	0	0	0	0	0	50000	130000	0	0	0	0	0	0	0	0	0	0	0	0	0	0	0	0	0	0	0	0	0	0	0	0	0	0	0	0	0	0	0	0	0	0	0	0
1021692269	710000	0	0	50000	0	0	0	0	0	0	0	360000	30000	300000	360000
1020424279	0	0	0	0	0	0	0	0	0	0	0	10000
7940856	780000	0	0	30000	0	0	0	0	0	0	0	350000	360000	380000	370000	0	0	0	0	0	0	0	0	0	0	0	0	0	0	0	0	0	0	0	0	0	0	0	0	0	0	0	0	0	0	0	0	0	0
1018551508	340000	330000	0	0	0	0	0	0	0	0	0	210000
10641721	410000	0	0	0	0	0	0	0	0	0	0	40000	0	0	0	0	0	0	0	0	0	0	0	0	0	0	0	0	0	0	0	0	0	0	0	0	0	0	0	0	0	0	0	0	0	0	0	0	0
12537659	0	0	0	0	0	0	0	0	0	0	0	10000	0	0	0	0	0	0	0	0	0	0	0	0	0	0	0	0	0	0	0	0	0	0	0	0	0	0	0	0	0	0	0	0	0	0	0	0	0
1014507003	0	0	0	0	0	0	0	0	0	0	0	0	0	0	10000
1018708695	0	100000	0	0	0	0	0	0	0	0	0	0	0	60000	10000
1020732978	530000	0	0	230000	0	0	0	0	0	0	0	0	0	110000	190000	0	0	0	0	0	0	0	0	0	0	0	0	0	0	0	0	0	0	0	0	0	0	0	0	0	0	0	0	0	0	0	0	0	0
1021574973	0	0	0	70000	0	0	0	0	0	0	0	0	0	0	320000
1022287913	0	60000	0	0	0	0	0	0	0	0	0	0	0	0	40000	0	0	0	0	50000	0	0	0	0	0	0	0	0	0	0	0	0	0	0	0	0	0	0	0	0	0	0	0	0	0	0	0	0	0
6609178	0	0	0	0	0	0	0	0	0	0	0	0	0	0	10000
1015701827	0	110000	0	20000	0	0	0	0	0	0	0	0	0	0	40000	0	0	0	0	100000	0	0	0	0	0	50000
1017822182	0	0	0	0	0	0	0	0	0	0	0	0	0	0	210000
1018517775	0	0	0	0	0	0	0	0	0	0	0	0	0	0	90000
1019799602	630000	180000	0	20000	0	0	0	0	0	0	0	0	0	270000	320000
1020379448	0	0	0	0	0	0	0	0	0	0	0	0	0	0	40000
1020438705	0	0	0	0	0	0	0	0	0	0	0	0	0	0	10000	0	0	0	0	0	0	0	0	0	0	0	0	0	0	0	0	0	0	0	0	0	0	0	0	0	0	0	0	0	0	0	0	0	0
1021256172	0	0	0	0	0	0	0	0	0	0	0	0	0	0	10000
11025640	0	0	0	30000	0	0	0	0	0	0	0	0	0	0	240000	0	0	0	0	0	0	0	0	0	0	0	0	0	0	0	0	0	0	0	0	0	0	0	0	0	0	0	0	0	0	0	0	0	0
1896795	0	0	0	210000	0	0	0	0	0	0	0	0	0	0	280000	0	0	0	0	0	0	0	0	0	0	0	0	0	0	0	0	0	0	0	0	0	0	0	0	0	0	0	0	0	0	0	0	0	0
1018522926	0	0	0	0	0	0	0	0	0	0	0	0	0	0	10000	0	0	0	0	0	0	0	0	0	0	0	0	0	0	0	0	0	0	0	0	0	110000	560000	20000	960000	0	0	0	940000	1410000	0	0	520000	0
1020696334	0	0	0	180000	0	0	0	0	0	0	0	0	0	0	60000	0	0	0	0	0	0	0	0	0	0	0	0	0	0	0	0	0	0	0	0	0	0	0	0	0	0	0	0	0	0	0	0	0	0
1021814083	0	0	0	0	0	0	0	0	0	0	0	0	0	0	150000
5597617	0	190000	0	0	0	0	0	0	0	0	0	0	0	0	210000
9584952	0	0	0	0	0	0	0	0	0	0	0	0	0	0	10000
1018302224	0	10000	0	10000	0	0	20000	0	0	0	0	0	0	0	20000	20000	0	0	0	20000	0	320000	440000	770000	0	520000	390000	290000	240000	690000	540000	530000	260000	430000	180000	0	110000	870000	1220000	2010000	1250000	140000	2970000	920000	1100000	40000	10000	1200000	0
1018816903	0	0	0	0	0	0	0	0	0	0	0	0	0	0	90000	0	0	0	0	0	0	0	0	0	0	0	0	0	0	0	0	0	0	0	0	0	0	0	0	0	0	0	0	0	0	0	0	0	0
1019475778	0	0	0	0	0	0	0	0	0	0	0	0	0	0	20000	0	0	0	0	0	0	0	0	0	0	0	0	0	0	0	0	0	0	0	0	0	0	0	0	0	0	0	0	0	0	0	0	0	0
1021144187	0	0	0	0	0	0	0	0	0	0	0	0	0	0	110000
1021899681	0	0	0	390000	0	0	0	0	0	0	0	0	0	0	260000	0	0	0	0	0	0	0	0	0	0	0	0	0	0	0	0	0	0	0	0	0	0	0	0	0	0	0	0	0	0	0	0	0	0
1022345112	0	0	0	220000	0	0	0	0	0	0	0	0	0	0	310000	0	0	0	0	0	0	0	0	0	0	0	0	0	0	0	0	0	0	0	0	0	0	0	0	0	0	0	0	0	0	0	0	0	0
1323220	0	0	0	0	0	0	0	0	0	0	0	0	0	0	40000
1017739169	0	0	0	0	0	0	0	0	0	0	0	0	0	0	50000
1019301944	0	0	0	0	0	0	0	0	0	0	0	0	0	0	10000	0	0	0	0	0	0	0	0	0	0	0	0	0	0	0	0	0	0	0	0	0	0	0	0	0	0	0	0	0	0	0	0	0	0
1019950647	0	0	0	0	0	0	0	0	0	0	0	0	0	0	10000	0	0	0	0	0	0	0	0	0	0	0	0	0	0	0	0	0	0	0	0	0	0	0	0	0	0	0	0	0	0	0	0	0	0
1020294837	0	0	0	50000	0	0	0	0	0	0	0	0	0	0	20000
1020870066	0	0	0	320000	0	0	0	0	0	0	0	0	0	0	300000	0	0	0	0	0	0	0	0	0	0	0	0	0	0	0	0	0	0	0	0	0	0	0	0	0	0	0	0	0	0	0	0	0	0
6044828	0	0	0	670000	0	0	0	0	0	0	0	0	0	0	280000	0	0	0	0	0	0	0	0	0	0	0	0	0	0	0	0	0	0	0	0	0	0	0	0	0	0	0	0	0	0	0	0	0	0
9292152	0	0	0	0	0	0	0	0	0	0	0	0	0	0	10000
1014802616	0	20000	0	0	0	0	0	0	0	0	0	0	0	0	30000	0	0	0	0	0	0	0	0	0	0	0	0	0	0	0	0	0	0	0	0	0	0	0	0	0	0	0	0	0	0	0	0	0	0
1019462826	0	0	0	0	0	0	0	0	0	0	0	0	0	0	10000	0	0	0	0	0	0	0	0	0	0	0	0	0	0	0	0	0	0	0	0	0	0	0	0	0	0	0	0	0	0	0	0	0	0
1020465298	20000	0	0	310000	0	0	0	0	0	0	0	0	0	260000	300000	0	0	0	0	0	0	0	0	0	0	0	0	0	0	0	0	0	0	0	0	0	0	0	0	0	0	0	0	0	0	0	0	0	0
1021032639	0	130000	0	10000	0	0	0	0	0	0	0	0	0	0	300000	0	0	0	0	120000	0	0	0	0	0	450000	0	0	0	0	0	0	0	0	850000	140000
1021509432	0	0	0	0	0	0	0	0	0	0	0	0	0	0	10000
1021679052	0	0	0	0	0	0	0	0	0	0	0	0	0	0	10000
1021685305	0	0	0	0	0	0	0	0	0	0	0	0	0	0	250000
4075940	0	10000	0	0	0	0	0	0	0	0	0	0	0	0	10000	0	0	0	0	20000	0	0	0	0	20000	10000	490000	0	200000	0	340000	330000	0	0	10000	1340000	0	0	0	0	600000	0	560000	0	0	10000	0	0	0
1015015014	0	10000	0	0	0	0	0	0	0	0	0	0	0	0	10000	0	0	0	0	0	10000	40000
1017600968	0	0	0	220000	0	0	0	0	0	0	0	0	0	140000	360000	0	0	0	0	240000	140000	0	0	0	0	0	0	0	0	0	0	0	0	0	0	0	0	0	0	0	0	0	0	0	0	0	0	0	0
1019292938	190000	0	0	0	0	0	0	0	0	0	0	0	0	180000	50000	0	0	0	0	0	0	0	0	0	0	0	0	0	0	0	0	0	0	0	0	0	0	0	0	0	240000	320000	0	0	0	0	0	0	0
1020089105	0	0	0	10000	0	0	0	0	0	0	0	0	0	0	20000	0	0	0	0	0	0	0	0	0	0	0	0	0	0	0	0	0	0	0	0	0	0	0	0	0	0	0	0	0	0	0	0	0	0
1020537482	0	190000	0	0	0	0	0	0	0	0	0	0	0	0	10000
1020663132	0	0	0	0	0	0	0	0	0	0	0	0	0	0	10000
1021162265	0	0	0	50000	0	0	0	0	0	0	0	0	0	0	190000	0	0	0	0	0	0	0	0	0	0	0	0	0	0	0	0	0	0	0	0	0	0	0	0	0	0	0	0	0	0	0	0	0	0
1021627670	0	0	0	0	0	0	0	0	0	0	0	0	0	0	40000	0	0	0	0	0	0	0	0	0	0	110000	0	0	0	0	0	0	0	0	10000	630000	0	0	0	0	0	0	0	0	0	0	0	0	0
1021743637	0	0	0	0	0	0	0	0	0	0	0	0	0	0	10000	0	0	0	0	0	0	0	0	0	0	0	0	0	0	0	0	0	0	0	0	0	0	0	180000	0	0	0	0	0	0	10000	0	0	0
10908749	0	0	0	10000	0	0	0	0	0	0	0	0	0	0	20000	0	0	0	0	0	0	0	0	0	230000	0	660000	490000	0	760000	370000	0	290000	470000	400000	1590000	110000	510000	660000	970000	1100000	480000	1170000	960000	1500000	350000	690000	430000	370000
6986531	0	0	0	120000	0	0	0	0	0	0	0	0	0	0	170000	0	0	0	0	10000	0	0	0	0	0	0	0	0	10000	0	170000	0	0	0	0	0	0	0	0	0	0	0	0	0	0	0	0	0	0
9475872	0	0	0	0	0	0	0	0	0	0	0	0	0	0	10000	0	0	0	0	0	0	0	0	0	0	0	0	40000	0	0	0	0	20000	0	0	0	0	0	0	0	0	50000	0	0	0	10000	0	0	0
1020419731	0	0	0	0	0	0	0	0	0	0	0	0	0	0	0	10000	0	0	0	0	0	0	0	0	0	0	280000	0	0	0	0	0	0	0	0	0	0	0	0	0	0	0	0	1170000	2480000	0	0	0	0
1020507478	0	0	0	0	0	0	0	0	0	0	0	0	0	0	0	50000
1020700004	0	0	0	0	0	0	0	0	0	0	0	0	0	0	0	10000
1014383162	0	60000
1014825758	0	30000
1016874585	0	170000
1017004789	0	50000
1019853187	0	10000
1019937175	0	40000
1020114561	0	30000
1020207885	0	80000
1020365996	0	210000
1020378880	0	10000
1020837792	0	30000	0	0	0	0	0	0	0	0	0	0	0	0	0	0	0	0	0	0	0	0	0	0	0	0	0	0	0	0	0	0	40000
1020847546	0	70000
1020943455	0	50000
1021032761	0	20000
1021173129	0	60000
1021557291	0	40000
1021579189	10000	220000
1021672026	0	10000
1021755178	0	130000	0	0	0	0	0	0	0	0	0	0	0	0	0	0	0	0	760000	170000	530000	800000
1021835269	0	40000
1022167664	0	150000
10809388	0	10000
12117384	0	50000
1225742	0	90000
3081458	0	40000
4755983	0	180000
5791245	0	60000
6127111	0	170000
7399195	0	20000
7416649	0	10000
9604538	0	20000
1015730881	0	10000	0	0	0	0	0	0	0	0	0	0	0	0	0	0	0	0	0	0	0	0	0	0	0	0	0	140000	0	750000	0	0	190000	420000	0	0	100000	330000	0	0	0	0	0	760000	1290000	0	0	0	0
1019435917	0	10000	0	0	0	0	0	0	0	0	0	0	0	0	0	0	0	0	0	0	0	0	0	0	0	0	0	0	0	0	0	0	0	0	0	0	0	0	0	0	0	0	10000	0	0	0	0	0	0
1019588383	0	20000	0	0	0	0	0	0	0	0	0	0	0	0	0	0	0	0	0	0	0	0	0	0	0	0	0	0	0	0	0	0	0	0	0	0	0	0	0	0	0	0	0	0	0	0	0	0	0
1020085190	0	80000	0	0	0	0	0	0	0	0	0	0	0	0	0	0	0	0	0	0	0	0	0	0	0	0	0	0	0	0	0	0	0	0	0	0	0	0	0	0	0	0	0	0	0	0	0	0	0
1020452040	0	10000
1020483835	0	50000
1020519363	0	60000
1020741296	0	90000	0	0	0	0	0	0	0	0	0	0	0	0	0	0	0	0	0	10000	0	0	0	0	0	0	0	0	0	0	0	0	0	0	0	0	0	0	0	0	0	0	0	0	0	0	0	0	0
1021282248	0	10000
1021333324	0	70000
1021369668	0	240000
1021509484	0	190000
1021580939	0	260000
1021591436	0	180000
1021685805	0	130000
1021785523	0	180000
1021794639	0	100000
1021901620	0	10000
1021995997	0	10000
1021997782	0	80000
1022273975	0	40000
1022277935	0	10000
11448363	0	130000
11629085	0	10000
1305403	0	300000
1308068	0	10000
4082006	0	100000
5706066	0	30000
6353160	0	10000
9418640	0	10000
9829691	0	30000
1017149525	0	10000
1019421759	0	20000
1019955683	0	20000
1019962786	0	20000
1020169006	0	50000
1020316769	0	20000
1020461023	0	30000
1020863164	0	90000
1020977454	0	30000
1021332575	0	40000
1021440966	0	10000
1021453946	0	20000
1021608120	0	130000
1021631698	0	30000
1021650992	0	40000	0	0	0	0	0	0	0	0	0	0	0	10000	0	0	0	0	10000	30000	10000	0	0	0	190000	10000
1021677579	0	50000
1021678646	0	70000
1021796162	0	60000
1021856981	0	10000
1022328919	0	20000
1022348186	0	90000
1022348711	0	10000
10662673	0	10000
12157119	0	10000
4821417	0	40000
8381531	0	100000	0	0	0	0	0	0	0	0	0	0	0	0	0	0	0	0	0	10000
1015005352	350000	190000
1018573526	0	150000	0	0	0	0	0	0	0	0	0	0	0	200000
1019264953	0	100000
1020210772	0	140000
1020694552	0	180000
1020887107	0	300000
1020967465	0	20000
1021158381	0	90000
1021396242	0	10000
1021458447	0	10000
1021506366	0	180000
1021519731	0	10000
1021595694	0	20000
1021630391	0	40000
1021663825	0	20000
1021829403	0	10000
1021871769	0	160000
1022069208	0	50000
1022151741	0	100000
3128945	0	30000
5259975	0	70000
555795	0	300000
8396622	0	300000
1015953636	0	110000
1016780976	0	60000
1017222761	0	140000
1017244428	0	10000	0	0	0	0	0	0	0	0	0	0	0	0	0	0	0	0	0	0	0	0	0	0	0	0	0	0	500000	0	0	1230000	20000	0	0	0	110000	540000	0	0	0	0	0	550000	1550000	40000	0	0	0
1019941194	0	280000	0	0	0	0	0	0	0	0	0	0	0	0	0	0	0	0	0	0	0	0	0	0	0	0	0	0	0	0	0	0	0	0	0	0	0	0	0	0	0	0	0	0	0	40000
1019955571	0	10000	0	0	0	0	0	0	0	0	0	0	0	0	0	0	0	0	0	10000	0	0	0	0	0	0	0	0	0	0	0	0	0	0	0	0	0	0	0	0	0	0	0	0	0	0	0	0	0
1019964698	0	20000
1020077503	0	10000
1020138707	0	220000
1020221092	0	20000
1020406310	0	10000
1020582843	0	50000
1020910679	0	80000
1020950741	0	60000
1021313774	0	10000
1021418280	0	120000	0	0	0	0	0	0	0	0	0	0	0	0	0	0	0	0	0	0	0	0	0	0	0	0	0	0	0	0	0	0	0	0	0	0	0	0	0	0	0	0	0	0	0	0	0	0	0
1021424151	0	120000
1021632554	0	100000
1021641208	0	30000
1021736119	0	20000	0	0	0	0	0	0	0	0	0	0	0	0	0	0	0	0	0	0	0	0	0	0	0	0	0	0	0	0	0	0	0	0	0	0	0	0	0	0	0	0	0	0	0	0	0	0	0
1022112099	0	260000
1022363589	0	70000
10746098	0	140000	0	0	0	0	0	0	0	0	0	0	0	0	0	0	0	0	0	40000
11144509	0	20000
2401055	0	40000
2453038	0	120000
2804887	0	80000
5215086	0	80000
6819807	0	10000
6895498	0	20000
7555696	0	40000
8398634	0	30000
9653932	0	50000
1014477446	0	40000	0	0	0	0	0	0	0	0	0	0	0	0	0	0	0	0	0	0	0	0	0	0	0	0	0	0	0	0	0	0	0	0	0	0	0	0	0	0	0	0	0	0	0	40000
1016176	0	220000
1016380762	0	60000	0	0	0	0	0	0	0	0	0	0	0	0	0	0	0	0	0	40000
1016909464	0	10000
1017573129	0	10000
1018012153	0	200000	0	0	0	0	0	0	0	0	0	0	0	0	0	0	0	0	0	0	0	0	0	0	0	0	0	0	0	0	0	0	0	0	0	0	0	0	0	0	0	0	0	0	0	0	0	0	0
1018395948	0	210000
1018421232	0	60000
1019941391	0	20000
1020265855	0	10000	0	0	0	0	0	0	0	0	0	0	0	0	0	0	0	0	0	0	0	0	0	0	0	0	0	0	0	0	0	0	0	0	0	0	0	0	0	0	0	10000	0	0	0	0	0	0	0
1020301638	0	10000
1020358948	0	10000
1020412859	0	10000
1020625055	0	20000
1020902145	0	10000
1020947410	0	110000	0	0	0	0	0	0	0	0	0	0	0	0	0	0	0	0	0	0	0	0	0	0	0	0	0	0	0	0	0	0	0	0	0	0	0	0	0	0	0	0	0	0	0	0	0	0	0
1020952519	0	280000
1021148850	0	50000
1021539537	0	340000
1021567705	0	170000	0	0	0	0	0	0	0	0	0	0	0	0	0	0	0	0	0	0	0	0	0	0	0	0	0	0	0	0	0	0	0	0	0	0	0	0	0	0	0	0	0	0	0	0	0	0	0
1021576178	0	30000
1021676300	0	40000	0	0	0	0	0	0	0	0	0	0	0	0	0	0	0	0	0	90000
1021760021	0	80000
1021818313	0	90000
1021825540	0	30000
1021835657	0	160000
1021886114	0	60000	0	0	0	0	0	0	0	0	0	0	0	0	0	0	0	0	430000	170000	120000	560000	350000	490000
1021917959	0	310000
1021942863	0	40000
1022256965	0	10000
1022273704	0	40000	0	0	0	0	0	0	0	0	0	0	0	0	0	0	0	0	10000	80000	120000	0	0	0	0	0	0	0	0	0	0	0	0	0	0	0	0	0	0	0	0	0	0	110000	0	0	0	0	0
1616790	0	210000
1928060	0	30000
2059163	0	20000
6539911	0	60000
6950527	0	50000
8183558	0	260000	0	0	0	0	0	0	0	0	0	0	0	0	0	0	0	0	0	130000
1017929130	0	30000
1019056096	0	10000	0	0	0	0	0	0	0	0	0	0	0	0	0	0	0	0	0	10000
1019067500	0	30000
1019250180	0	270000
1019265607	0	20000
1020138282	0	10000
1020147387	0	80000
1020289614	0	30000
1020381640	0	10000	0	0	0	0	0	0	0	0	0	0	0	0	0	0	0	0	0	0	0	0	0	0	70000	0	10000	220000	90000	660000	540000	500000	270000	430000	530000	330000	110000	430000	390000	620000	0	0	0	20000	1470000	0	340000	0	240000
1020382858	0	10000	0	0	0	0	0	0	0	0	0	0	0	0	0	0	0	0	0	20000	0	0	0	0	0	0	0	0	0	0	0	0	0	0	0	0	0	0	0	0	0	0	0	840000	1110000	0	0	0	0
1020648800	0	30000
1020834777	0	20000
1021599714	0	20000
1021641088	0	30000
1021647592	0	10000
1021675405	0	10000	0	0	0	0	0	0	0	0	0	0	0	0	0	0	0	0	0	0	0	0	0	0	0	0	0	0	0	0	0	0	0	0	0	0	0	0	0	0	0	0	0	0	0	0	0	0	0
1021781137	0	240000
1021868469	0	20000	0	0	0	0	0	0	0	0	0	0	0	0	0	0	0	0	0	150000
1022036483	0	20000
3719986	0	340000
490545	0	10000
1014516909	0	250000
1019213414	0	10000
1019652446	0	270000
1020194955	0	120000
1020425639	0	10000
1021020329	0	20000
1021117913	0	40000
1021289766	0	30000	0	0	0	0	0	0	0	0	0	0	0	0	0	0	0	0	0	0	0	0	0	0	0	0	0	0	0	0	0	0	0	0	0	0	0	0	0	0	0	0	0	0	0	0	0	0	0
1021474258	0	20000	0	0	0	0	0	0	0	0	0	0	0	0	0	0	0	0	0	0	0	0	0	0	0	0	0	0	0	0	0	0	0	0	0	0	0	0	0	0	0	0	0	0	0	0	0	0	0
1021501981	0	60000
1021545626	0	10000
1021762807	0	80000
1021783633	0	10000
1021789972	0	160000
1022119015	0	40000
10667464	0	170000
10841316	0	30000
11258645	0	200000
11614924	0	30000
11725381	0	80000
5536360	0	40000	0	0	0	0	0	0	0	0	0	0	0	0	0	0	0	0	0	0	0	0	0	0	0	0	0	0	0	0	0	0	0	0	0	0	0	0	0	0	0	0	0	0	0	210000	160000	0	20000
5731277	0	130000
8132736	0	10000
9564749	0	60000	0	0	0	0	0	0	0	0	0	0	0	0	0	0	0	0	0	0	0	0	0	0	0	0	0	0	0	0	0	0	0	0	0	0	0	0	0	0	0	0	0	0	0	0	0	0	0
6507502	230000	0	0	0	0	0	0	0	0	0	0	0	0	140000	0	0	0	0	450000	40000	380000	630000	500000	730000	170000	270000	340000	0	0	0	0	0	0	0	500000	790000
1021217708	10000	0	0	0	0	0	0	0	0	0	0	0	0	0	0	0	0	0	0	0	0	0	0	0	0	0	0	30000	0	0	0	0	270000	0	0	0	0	0	0	0	0	0	0	0	0	0	0	0	0
1021574999	10000	0	0	0	0	0	0	0	0	0	0	0	0	0	0	0	0	0	10000	0	0	10000	10000	0	0	0	0	0	0	0	0	0	50000	0	0	0	10000	50000	0	0	0	0	0	320000	250000	0	0	0	0
8148615	20000
1019651136	0	0	0	0	20000
13047559	0	0	0	0	20000	0	0	0	0	0	0	0	0	0	0	0	0	0	0	0	0	0	0	0	0	0	0	0	0	0	0	0	0	0	0	0	0	0	0	0	0	0	0	0	0	0	0	0	0
1018256155	0	0	0	130000	20000
7132189	0	0	0	0	0	0	0	0	20000
1020256852	0	0	0	0	0	0	0	0	10000
1018747768	0	0	0	0	0	0	0	0	10000	0	0	0	0	0	0	0	0	0	1570000	350000	1370000	2050000	570000	30000	80000	660000	20000	10000	60000	0	130000	30000	80000	0	30000	0	0	0	0	0	0	0	0	0	0	0	0	0	0
1020110687	0	0	0	0	0	0	0	0	90000
1017835828	0	0	0	0	0	0	0	0	0	0	0	0	0	0	0	0	0	0	610000	160000	560000	680000
1020036139	0	0	0	0	0	0	0	0	0	0	0	0	0	0	0	0	0	0	0	0	0	30000	20000	0	0	0	0	0	0	0	0	0	0	0	0	0	0	0	0	0	0	0	0	0	0	0	0	0	0
1020079394	0	0	0	0	0	0	0	0	0	0	0	0	0	0	0	0	0	0	740000	170000	610000	930000	120000
1021908309	0	0	0	0	0	0	0	0	0	0	0	0	0	0	0	0	0	0	710000	150000	30000	60000	0	0	0	50000
7680264	0	0	0	0	0	0	0	0	0	0	0	0	0	0	0	0	0	0	760000	160000	620000	60000	0	0	0	0	0	0	0	0	0	0	0	0	0	0	0	0	0	0	0	0	0	0	0	0	0	0	0
1017322248	0	0	0	0	0	0	0	0	0	0	0	0	0	0	0	0	0	0	760000	170000	610000	930000	750000	790000	0	510000	0	0	0	0	0	0	0	0	630000
1019422838	0	0	0	0	0	0	0	0	0	0	0	0	0	0	0	0	0	0	380000	0	0	240000	380000	410000	0	280000	0	0	0	0	0	0	0	0	450000	10000
1021410456	0	0	0	0	0	0	0	0	0	0	0	0	0	0	0	0	0	0	0	0	0	670000	510000	530000	230000	320000	630000	280000	0	670000	0	0	270000	330000	640000	960000
1021658391	0	0	0	0	0	0	0	0	0	0	0	0	0	0	0	0	0	0	560000	170000	450000	790000	880000	850000	250000	480000	360000	10000	0	0	0	20000	60000	10000	1080000	1220000	80000	350000	0	0	0	0	0	510000	990000	0	0	0	0
1623952	0	0	0	0	0	0	0	0	0	0	0	0	0	0	0	0	0	0	740000	170000	650000	40000
3394982	0	0	0	0	0	0	0	0	0	0	0	0	0	0	0	0	0	0	40000	0	0	150000	110000	20000	20000	60000	0	0	0	0	0	0	0	0	490000	860000	0	0	0	0	360000	30000	690000	0	0	0	0	0	0
5273496	0	0	0	0	0	0	0	0	0	0	0	0	0	0	0	0	0	180000	760000	170000	600000	920000	270000
1014157459	0	0	0	0	0	0	0	0	0	0	0	0	0	0	0	0	0	0	500000	120000	430000	690000	520000	590000
1018296129	0	0	0	0	0	0	0	0	0	0	0	0	0	0	0	0	0	0	2040000	180000	110000	1150000	1270000
1019409467	0	0	0	0	0	0	0	0	0	0	0	0	0	0	0	0	0	0	720000	20000	20000	420000	0	10000	10000	0	360000	140000	240000	350000	390000	500000	140000	220000	0	0	110000	330000	290000	490000	770000	210000	540000	940000	1400000	160000	290000	270000	200000
1019432135	0	0	0	0	0	0	0	0	0	0	0	0	0	0	0	0	0	0	740000	170000	610000	580000
1021414987	0	0	0	0	0	0	0	0	0	0	0	0	0	0	0	0	0	0	600000	60000	490000	520000	30000
1021418466	0	0	0	0	0	0	0	0	0	0	0	0	0	0	0	0	0	0	530000	10000	0	670000	720000	500000	180000	340000	690000	250000	0	690000	0	0	210000	0	850000	1250000	0	0	0	0	0	0	0	0	0	0	0	0	0
1021797006	0	0	0	0	0	0	0	0	0	0	0	0	0	0	0	0	0	0	730000	170000	600000	1330000	790000	790000	210000	470000	640000	300000	250000	1070000	750000	720000	230000	510000	940000	1970000	0	70000	370000	0	0	0	0	990000	1150000	290000	1030000	0	520000
1018715465	0	0	0	0	0	0	0	0	0	0	0	0	0	0	0	0	0	0	1130000	20000	40000	1040000	920000	890000	300000	700000	290000	0	0	0	0	0	240000	0	1040000	1090000	110000	450000	470000	0	0	0	0	940000	2040000	340000	750000	0	370000
1021663094	0	0	0	0	0	0	0	0	0	0	0	0	0	0	0	0	0	0	680000	170000	640000	470000
1021913134	0	0	0	0	0	0	0	0	0	0	0	0	0	0	0	0	0	0	820000	260000	770000	530000	1140000	10000
2164596	0	0	0	0	0	0	0	0	0	0	0	0	0	0	0	0	0	0	260000	170000	620000	1120000	790000	830000	310000	490000	650000	280000	0	400000	0	0	280000	0	910000	1520000	0	0	0	0	0	0	0	0	0	0	0	0	0
4859467	0	0	0	0	0	0	0	0	0	0	0	0	0	0	0	0	0	0	380000	90000	360000	490000	380000	400000	160000	250000	400000	0	0	0	0	0	30000	0	520000	950000
1018248136	0	0	0	0	0	0	0	0	0	0	0	0	0	0	0	0	0	0	580000	170000	570000	290000
1020014109	0	0	0	0	0	0	0	0	0	0	0	0	0	0	0	0	0	0	370000	90000	380000	470000	400000	570000	160000	280000	490000	0	0	0	0	0	100000	0	490000	1950000	0	0	0	0	0	0	0	0	0	0	0	0	0
1021097903	0	0	0	0	0	0	0	0	0	0	0	0	0	0	0	0	0	0	720000	110000	900000	1120000	770000	880000	0	10000
1021117041	0	0	0	0	0	0	0	0	0	0	0	0	0	0	0	0	0	0	760000	30000	780000	1020000	820000	510000	0	10000	0	0	0	0	0	0	0	0	0	100000
1021993562	0	0	0	0	0	0	0	0	0	0	0	0	0	0	0	0	0	0	780000	170000	790000	1750000	1340000	370000	0	10000
1022274796	0	0	0	0	0	0	0	0	0	0	0	0	0	0	0	0	0	0	710000	140000	510000	850000	610000	20000
1495308	0	0	0	0	0	0	0	0	0	0	0	0	0	0	0	0	0	0	30000	10000	20000	10000
6783569	0	0	0	0	0	0	0	0	0	0	0	0	0	0	0	0	0	0	0	0	0	870000	10000
1020608664	0	0	0	0	0	0	0	0	0	0	0	0	0	0	0	0	0	0	730000	0	440000	300000	0	0	0	0	0	0	0	0	0	0	0	0	0	0	0	0	0	0	0	0	0	50000	0	0	0	0	0
1020660369	0	0	0	0	0	0	0	0	0	0	0	0	0	0	0	0	0	0	750000	170000	610000	340000	570000	10000	0	0	0	0	0	0	0	0	0	0	0	0	0	0	0	0	0	0	0	60000	100000	0	0	0	0
1020777085	0	0	0	0	0	0	0	0	0	0	0	0	0	0	0	0	0	0	10000	10000	20000	20000	60000	0	0	0	0	0	0	0	0	0	0	0	0	0	0	0	0	0	0	0	0	0	0	0	50000	0	0
1021313714	0	0	0	0	0	0	0	0	0	0	0	0	0	0	0	0	0	0	840000	40000	590000	20000
1021571840	0	0	0	0	0	0	0	0	0	0	0	0	0	0	0	0	0	0	900000	180000	700000	1080000	890000	440000	0	0	0	0	0	0	0	0	0	0	0	0	10000	0	0	0	0	0	0	60000	30000	0	0	0	0
1022035754	0	0	0	0	0	0	0	0	0	0	0	0	0	0	0	0	0	0	30000	70000	40000	10000	0	0	0	0	0	0	0	0	0	0	0	0	0	0	0	0	0	0	0	0	0	0	0	0	0	0	0
2297144	0	0	0	0	0	0	0	0	0	0	0	0	0	0	0	0	0	0	750000	170000	760000	20000	0	0	0	0	0	0	0	0	0	0	0	0	0	0	110000	510000	0	0	160000	20000	0	1030000	1860000	280000	0	0	0
1017608094	0	0	0	0	0	0	0	0	0	0	0	0	0	0	0	0	0	0	770000	0	610000	920000	750000	790000	0	480000	0	0	0	0	0	0	0	0	10000
1019552195	0	0	0	0	0	0	0	0	0	0	0	0	0	0	0	0	0	0	760000	170000	610000	930000	740000	570000	240000	40000	640000	280000	240000	670000	220000	500000	290000	380000	40000	1380000	0	0	0	0	1140000	850000	0	820000	0	20000	0	510000	0
1019702271	0	0	0	0	0	0	0	0	0	0	0	0	0	0	0	0	0	0	390000	110000	390000	460000	390000	410000
11783161	0	0	0	0	0	0	0	0	0	0	0	0	0	0	0	0	0	0	0	400000	180000	10000
4561204	0	0	0	0	0	0	0	0	0	0	0	0	0	0	0	0	0	0	800000	170000	650000	560000	860000	750000	220000	480000	680000	340000	240000	640000	620000	460000	290000	0	950000	1450000
8372855	0	0	0	0	0	0	0	0	0	0	0	0	0	0	0	0	0	420000	150000	200000	240000	280000	0	0	0	0	0	0	0	0	0	0	0	0	0	0	0	0	0	0	0	0	0	0	0	0	0	0	0
1020445216	0	0	0	0	0	0	0	0	0	0	0	0	0	10000
1020764865	0	0	0	0	0	0	0	0	0	0	0	0	0	140000	0	0	0	0	0	0	0	0	0	0	0	0	0	0	0	0	0	0	0	0	0	0	0	0	0	0	0	90000	0	0	0	0	0	0	0
6353241	0	0	0	0	0	0	0	0	0	0	0	0	0	50000	0	0	0	0	0	0	0	0	0	0	0	0	0	0	0	0	0	0	0	0	0	0	0	0	0	0	0	0	0	0	0	0	0	0	0
1020978839	0	0	0	0	0	0	0	0	0	0	0	0	0	0	0	0	0	0	10000	170000	630000	0	0	0	0	0	0	0	0	0	0	0	0	0	0	0	0	0	0	0	0	0	0	0	0	0	0	0	0
1021591176	0	0	0	0	0	0	0	0	0	0	0	0	0	0	0	0	0	0	0	170000	90000
12353191	0	0	0	0	0	0	0	0	0	0	0	0	0	0	0	0	0	0	10000	180000	220000
12375724	0	0	0	0	0	0	0	0	0	0	0	0	0	0	0	0	0	0	0	110000	50000	0	0	0	0	0	0	0	0	0	0	0	0	0	0	0	0	0	0	0	0	0	0	0	0	0	0	0	0
2097104	0	0	0	0	0	0	0	0	0	0	0	0	0	0	0	0	0	0	50000	30000	570000
1016023522	0	0	0	0	0	0	0	0	0	0	0	0	0	0	0	0	0	0	70000	30000	740000	0	330000	0	0	490000	0	0	0	0	0	0	0	0	970000	510000
1019457340	0	0	0	0	0	0	0	0	0	0	0	0	0	0	0	0	0	0	630000	0	620000	0	0	0	0	0	0	0	0	0	0	0	0	0	0	0	0	100000	570000	0	0	0	1040000	0	0	280000	240000	0	370000
1020450035	0	0	0	0	0	0	0	0	0	0	0	0	0	0	0	0	0	0	0	20000	30000	0	0	0	0	0	0	0	0	0	0	0	90000	0	0	0	0	0	0	0	0	0	0	0	0	0	0	120000	0
1020795905	0	0	0	0	0	0	0	0	0	0	0	0	0	0	0	0	0	0	10000	180000	860000	0	0	0	0	0	0	0	0	0	0	0	0	0	0	0	0	0	0	0	0	0	0	0	0	0	0	0	0
1021512451	0	0	0	0	0	0	0	0	0	0	0	0	0	0	0	0	0	0	0	170000	140000
1020751456	0	0	0	0	0	0	0	0	0	0	0	0	0	0	0	0	0	0	0	10000	80000	0	0	0	0	90000	0	0	0	0	0	0	0	0	0	0	0	0	0	0	0	0	0	30000	0	10000	0	0	0
1021277391	0	0	0	0	0	0	0	0	0	0	0	0	0	0	0	0	0	0	0	180000	580000
2734489	0	0	0	0	0	0	0	0	0	0	0	0	0	0	0	0	0	0	0	110000	310000
3041809	0	0	0	0	0	0	0	0	0	0	0	0	0	0	0	0	0	0	10000	180000	610000
7696061	0	0	0	0	0	0	0	0	0	0	0	0	0	0	0	0	0	0	530000	170000	630000
1019261749	0	0	0	0	0	0	0	0	0	0	0	0	0	0	0	0	0	0	580000	150000	650000	0	0	0	0	0	0	0	0	0	0	0	0	0	0	0	0	0	0	0	0	0	0	950000	0	0	0	0	0
1021333388	0	0	0	0	0	0	0	0	0	0	0	0	0	0	0	0	0	0	20000	160000	610000	0	0	0	0	0	0	0	0	0	0	0	30000
1021837631	0	0	0	0	0	0	0	0	0	0	0	0	0	0	0	0	0	0	0	110000	130000	0	0	0	0	0	0	0	0	0	0	0	0	0	0	0	0	0	140000	420000	0	0	0	840000	120000	60000	720000	0	610000
11526274	0	0	0	0	0	0	0	0	0	0	0	0	0	0	0	0	0	0	760000	180000	650000
8090951	0	0	0	0	0	0	0	0	0	0	0	0	0	0	0	0	0	0	0	120000	680000
982713	0	0	0	0	0	0	0	0	0	0	0	0	0	0	0	0	0	0	10000	50000	80000	0	60000
1014798243	0	0	0	0	0	0	0	0	0	0	0	0	0	0	0	0	0	0	0	30000	140000
1015542533	0	0	0	0	0	0	0	0	0	0	0	0	0	0	0	0	0	0	540000	170000	180000	0	0	0	0	0	0	0	0	0	0	0	0	0	0	0	0	0	0	0	0	0	0	90000	830000	0	0	0	0
1020062084	0	0	0	0	0	0	0	0	0	0	0	0	0	0	0	0	0	0	0	130000	20000
1020953829	0	0	0	0	0	0	0	0	0	0	0	0	0	0	0	0	0	0	0	20000	240000	0	0	0	240000	40000	60000	70000	250000	0	530000	530000	20000	340000	260000	20000	0	0	0	0	0	0	0	20000	0	0	0	0	0
1021576047	0	0	0	0	0	0	0	0	0	0	0	0	0	0	0	0	0	0	0	170000	40000
1020056921	0	0	0	0	0	0	0	0	0	0	0	0	0	0	0	0	0	0	0	210000	80000	0	0	0	140000	350000	400000	180000	0	10000	0	0	160000	0	580000	1130000
1020344332	0	0	0	0	0	0	0	0	0	0	0	0	0	0	0	0	0	0	0	190000	330000	0	0	0	0	20000	0	0	0	0	0	0	0	0	0	0	0	0	0	0	0	0	0	0	0	0	0	0	0
1020526822	0	0	0	0	0	0	0	0	0	0	0	0	0	0	0	0	0	0	60000	170000	630000
1020836170	0	0	0	0	0	0	0	0	0	0	0	0	0	0	0	0	0	0	0	190000	290000
1020894288	0	0	0	0	0	0	0	0	0	0	0	0	0	0	0	0	0	0	20000	240000	340000	0	0	0	0	0	0	0	0	0	0	0	0	0	0	0	0	0	0	0	0	0	0	0	0	0	0	0	0
1021564537	0	0	0	0	0	0	0	0	0	0	0	0	0	0	0	0	0	0	0	170000	330000
1021597034	0	0	0	0	0	0	0	0	0	0	0	0	0	0	0	0	0	0	0	140000	20000
1021806895	0	0	0	0	0	0	0	0	0	0	0	0	0	0	0	0	0	0	0	20000	10000
1021822116	0	0	0	0	0	0	0	0	0	0	0	0	0	0	0	0	0	0	0	40000	30000	0	750000	510000	0	60000
1021761689	0	0	0	0	0	0	0	0	0	0	0	0	0	0	0	0	0	0	0	190000	10000	0	0	0	0	0	0	0	0	0	0	0	0	0	0	0	0	0	0	0	0	0	0	0	0	0	0	0	0
1016672656	0	0	0	0	0	0	0	0	0	0	0	0	0	0	0	0	0	0	650000	530000	1380000	0	0	0	0	0	0	0	0	0	0	0	0	0	0	0	0	0	0	0	0	0	0	0	0	0	0	0	0
1018932741	0	0	0	0	0	0	0	0	0	0	0	0	0	0	0	0	0	0	30000	170000	360000	0	0	0	0	10000	0	0	0	0	0	0	30000	0	0	0	0	0	0	0	0	0	0	0	0	0	0	0	0
1020767607	0	0	0	0	0	0	0	0	0	0	0	0	0	0	0	0	0	0	0	130000	140000	0	0	0	0	70000	0	0	0	0	0	0	0	0	520000	0	0	0	0	0	0	0	0	420000	1330000	0	0	0	0
4549808	0	0	0	0	0	0	0	0	0	0	0	0	0	0	0	0	0	0	0	110000	10000
1018938460	0	0	0	230000	0	0	0	0	0	0	0	0	0	0	0	0	0	0	0	0	0	0	0	0	0	0	0	0	0	0	0	0	0	0	0	0	0	0	0	0	0	0	0	0	0	0	0	0	0
1019559261	0	0	0	0	0	0	20000
7876559	0	0	0	0	0	0	0	0	0	0	0	0	40000	0	0	0	0	0	0	0	0	0	0	0	0	0	0	0	0	0	0	0	0	0	0	0	0	0	0	0	0	0	0	20000	0	0	0	0	0
1020017671	0	0	0	0	0	0	0	0	0	0	0	0	190000
1019743072	0	0	0	0	0	0	0	0	0	0	0	0	140000	0	0	0	0	0	0	0	0	0	0	0	0	0	0	0	0	0	0	0	0	0	0	0	0	0	0	0	0	0	0	0	0	0	0	0	0
10685732	0	0	0	0	0	0	0	0	0	0	0	0	60000
1020011205	0	0	0	0	0	0	0	0	0	0	0	0	0	0	0	0	10000	0	0	0	0	0	0	0	0	0	0	0	0	0	0	0	0	0	0	0	0	0	0	0	0	0	0	0	0	0	0	0	0
1020847579	0	0	0	0	0	0	0	0	0	0	0	0	0	0	0	0	0	20000
10502279	0	0	0	0	0	0	0	0	0	0	0	0	0	0	0	0	0	170000	0	90000
1020968076	0	0	0	0	0	0	0	0	0	0	0	0	0	0	0	0	0	0	10000	0	0	0	0	20000
1020584724	0	0	0	0	0	0	0	0	0	0	0	0	0	0	0	0	0	0	40000
1019037474	0	0	0	0	0	0	0	0	0	0	0	0	0	0	0	0	0	0	30000
1020686310	0	0	0	0	0	0	0	0	0	0	0	0	0	0	0	0	0	0	20000	0	0	0	0	20000	0	490000	0	0	0	0	0	0	0	0	20000	0	0	0	0	0	0	0	0	0	0	0	0	0	0
1018951132	0	0	0	0	0	0	0	0	0	0	0	0	0	0	0	0	0	0	0	40000
1020099136	0	0	0	0	0	0	0	0	0	0	0	0	0	0	0	0	0	0	0	20000
1020295189	0	0	0	0	0	0	0	0	0	0	0	0	0	0	0	0	0	0	0	30000	0	0	0	0	0	0	0	0	0	0	0	0	0	0	0	0	0	0	0	0	0	0	0	0	0	0	0	0	0
1021458879	0	0	0	0	0	0	0	0	0	0	0	0	0	0	0	0	0	0	0	20000
1021629918	0	0	0	0	0	0	0	0	0	0	0	0	0	0	0	0	0	0	0	20000
1022030142	0	0	0	0	0	0	0	0	0	0	0	0	0	0	0	0	0	0	0	90000	0	0	0	0	0	0	0	0	0	0	0	0	0	0	0	0	0	0	0	0	0	0	0	0	0	0	0	0	0
1018037314	0	0	0	0	0	0	0	0	0	0	0	0	0	0	0	0	0	0	0	10000	0	0	0	0	0	0	0	0	0	0	0	0	0	0	0	0	0	0	0	0	0	0	0	0	0	0	0	0	0
1021541617	0	0	0	0	0	0	0	0	0	0	0	0	0	0	0	0	0	0	0	50000
1022058048	0	0	0	0	0	0	0	0	0	0	0	0	0	0	0	0	0	0	0	10000
1022220650	0	0	0	0	0	0	0	0	0	0	0	0	0	0	0	0	0	0	0	140000
12123603	0	0	0	0	0	0	0	0	0	0	0	0	0	0	0	0	0	0	0	10000	0	0	0	0	0	0	0	0	0	0	0	0	0	0	0	0	0	0	0	0	0	0	0	0	0	0	0	0	0
8357368	0	0	0	0	0	0	0	0	0	0	0	0	0	0	0	0	0	0	0	80000	0	0	0	0	190000	240000	120000	0	0	0	0	0	0	0	90000	100000
1019646415	0	0	0	0	0	0	0	0	0	0	0	0	0	0	0	0	0	0	0	40000	0	0	0	0	0	0	0	0	0	0	0	0	0	0	0	0	0	0	0	0	0	0	0	0	0	0	0	0	0
1020721855	0	0	0	0	0	0	0	0	0	0	0	0	0	0	0	0	0	0	0	30000
1021084926	0	0	0	0	0	0	0	0	0	0	0	0	0	0	0	0	0	0	0	20000
1018648112	0	0	0	0	0	0	0	0	0	0	0	0	0	0	0	0	0	0	0	30000	0	0	0	0	0	0	0	0	0	0	0	0	0	0	0	0	0	0	0	0	0	0	0	0	0	0	0	0	0
1018702867	0	0	0	0	0	0	0	0	0	0	0	0	0	0	0	0	0	0	0	10000
1019691137	0	0	0	0	0	0	0	0	0	0	0	0	0	0	0	0	0	0	0	10000	0	0	0	0	0	0	0	0	0	0	0	0	0	0	0	0	0	0	0	0	0	0	130000	0	0	0	0	0	0
1020677018	0	0	0	0	0	0	0	0	0	0	0	0	0	0	0	0	0	0	0	40000	0	0	0	0	0	0	0	0	0	0	0	0	0	0	0	0	0	0	0	0	0	0	0	0	0	0	0	0	0
1021693239	0	0	0	0	0	0	0	0	0	0	0	0	0	0	0	0	0	0	0	60000
1021699839	0	0	0	0	0	0	0	0	0	0	0	0	0	0	0	0	0	0	0	50000
3459726	0	0	0	0	0	0	0	0	0	0	0	0	0	0	0	0	0	0	0	10000	0	0	0	0	240000	310000	500000	200000	0	550000	0	0	220000	350000	660000	1070000
1021082812	0	0	0	0	0	0	0	0	0	0	0	0	0	0	0	0	0	0	0	100000
1020091593	0	0	0	0	0	0	0	0	0	0	0	0	0	0	0	0	0	0	0	90000
11786218	0	0	0	0	0	0	0	0	0	0	0	0	0	0	0	0	0	0	0	20000
1020106368	0	0	0	0	0	0	0	0	0	0	0	0	0	0	0	0	0	0	0	10000
1021572368	0	0	0	0	0	0	0	0	0	0	0	0	0	0	0	0	0	0	0	40000	0	0	0	0	0	0	0	0	0	0	0	0	0	0	0	0	180000	20000	570000	1170000	870000	360000	1290000	930000	1270000	280000	550000	520000	370000
1017079560	0	0	0	0	0	0	0	0	0	0	0	0	0	0	0	0	0	0	0	50000	0	0	0	0	0	0	0	0	0	0	0	0	0	0	0	0	0	0	0	0	0	0	0	0	0	0	0	0	0
1021864901	0	0	0	0	0	0	0	0	0	0	0	0	0	0	0	0	0	0	0	70000	0	0	0	0	70000	510000	0	0	0	0	0	0	0	0	960000	1580000
1022033278	0	0	0	0	0	0	0	0	0	0	0	0	0	0	0	0	0	0	0	40000
1015289779	0	0	0	0	0	0	0	0	0	0	0	0	0	0	0	0	0	0	0	0	0	0	0	0	0	540000	0	0	0	0	0	0	0	0	500000	0	0	0	0	0	0	0	0	0	0	0	0	0	0
1019950460	0	0	0	0	0	0	0	0	0	0	0	0	0	0	0	0	0	0	0	0	0	0	0	0	40000	480000	70000	30000	20000	40000	70000	40000	20000	30000	510000	70000	0	0	0	0	0	0	0	140000	0	0	0	0	0
1020445430	0	0	0	0	0	0	0	0	0	0	0	0	0	0	0	0	0	0	0	0	0	0	410000	450000	140000	250000	360000	160000	0	240000	0	0	140000	0	490000	730000	60000	220000	260000	210000	420000	200000	200000	560000	760000	110000	380000	90000	270000
1020589255	0	0	0	0	0	0	0	0	0	0	0	0	0	0	0	0	0	0	0	0	0	0	0	0	0	10000	0	0	0	0	0	0	0	0	0	0	20000	0	0	0	0	0	0	10000	0	0	0	0	0
1020043857	0	0	0	0	0	0	0	0	0	0	0	0	0	0	0	0	0	0	0	0	0	0	0	0	0	20000	0	0	30000	0	20000	30000	20000	0	0	0	0	0	0	0	0	0	0	0	0	0	0	0	0
1020257175	0	0	0	0	0	0	0	0	0	0	0	0	0	0	0	0	0	0	0	0	0	0	0	0	50000	10000	30000
1021729220	0	0	0	0	0	0	0	0	0	0	0	0	0	0	0	0	0	0	0	0	0	0	0	0	10000	70000	0	0	0	0	0	0	0	0	20000	1410000
1021875709	0	0	0	0	0	0	0	0	0	0	0	0	0	0	0	0	0	0	0	0	0	0	0	10000	0	10000	0	0	0	0	0	20000	10000	0	0	0	0	0	0	0	0	0	0	0	0	0	0	0	0
11348843	0	0	0	0	0	0	0	0	0	0	0	0	0	0	0	0	0	0	0	0	0	0	0	0	220000	140000	1170000	0	0	0	0	0	20000	0	1440000	1500000
3419001	0	0	0	0	0	0	0	0	0	0	0	0	0	0	0	0	0	0	0	0	0	0	0	0	0	190000	0	10000	0	0	0	0	30000	0	0	0	0	0	0	0	580000	270000	0	0	0	0	0	0	0
6149929	0	0	0	0	0	0	0	0	0	0	0	0	0	0	0	0	0	0	0	0	0	0	450000	280000	0	480000	0	0	0	0	0	0	0	0	560000
1015494003	0	0	0	0	0	0	0	0	0	0	0	0	0	0	0	0	0	0	0	0	0	0	0	0	0	310000	0	0	0	0	0	0	0	0	50000	0	0	0	0	0	0	0	0	0	0	0	0	0	0
1021557819	0	0	0	0	0	0	0	0	0	0	0	0	0	0	0	0	0	0	0	0	0	0	0	0	0	30000
2639328	0	0	0	0	0	0	0	0	0	0	0	0	0	0	0	0	0	0	0	0	0	0	0	0	0	10000
1021767129	0	0	0	0	0	0	0	0	0	0	0	0	0	0	0	0	0	0	0	0	0	0	0	0	350000	480000	630000	0	0	0	0	0	30000	0	20000	1620000
1020332684	0	0	0	0	0	0	0	0	0	0	0	0	0	0	0	0	0	0	0	0	0	0	0	0	0	30000	0	300000	260000	670000	580000	410000	290000	490000	0	0	0	0	0	0	0	0	0	0	0	0	0	0	0
1021687194	0	0	0	0	0	0	0	0	0	0	0	0	0	0	0	0	0	0	0	0	0	0	0	0	0	30000	0	0	0	0	0	0	110000
1014890977	0	0	0	0	0	0	0	0	0	0	0	0	0	0	0	0	0	0	0	0	0	0	0	860000	0	470000	0	0	0	0	0	0	0	0	970000	1290000	0	0	0	0	0	0	0	940000	1450000	0	0	0	0
1020812110	0	0	0	0	0	0	0	0	0	0	0	0	0	0	0	0	0	0	0	0	0	0	0	0	30000	90000	30000	0	0	0	0	0	30000	0	10000	120000	0	0	230000	10000	0	0	0	0	0	200000	590000	270000	400000
12534144	0	0	0	0	0	0	0	0	0	0	0	0	0	0	0	0	0	0	0	0	0	0	220000	0	0	40000	0	0	0	0	0	0	0	0	1230000
3665828	0	0	0	0	0	0	0	0	0	0	0	0	0	0	0	0	0	0	0	0	0	0	0	0	20000	380000	0	0	0	0	0	0	0	0	590000	0	0	0	0	0	0	0	0	650000	0	0	0	0	0
1019625412	0	0	0	0	0	0	0	0	0	0	0	0	0	0	0	0	0	0	0	0	0	0	200000	550000	210000	250000	620000	310000	10000	1340000	10000	0	150000	430000	320000	220000	20000	490000	0	10000	0	0	0	920000	1390000	620000	550000	0	0
1019956141	0	0	0	0	0	0	0	0	0	0	0	0	0	0	0	0	0	0	0	0	0	0	40000	340000	110000	480000	20000	170000	0	90000	0	0	70000	210000	460000	140000	10000	10000	0	10000	10000	20000	10000	0	10000	10000	10000	10000	10000
1020416296	0	0	0	0	0	0	0	0	0	0	0	0	0	0	0	0	0	0	0	0	0	0	0	180000	0	90000	0	0	0	0	0	0	0	0	80000
1020438829	0	0	0	0	0	0	0	0	0	0	0	0	0	0	0	0	0	0	0	0	0	0	0	0	0	390000	0	0	0	0	0	0	0	0	0	0	0	0	320000	0	0	0	0	1230000	0	290000	560000	0	360000
1021779130	0	0	0	0	0	0	0	0	0	0	0	0	0	0	0	0	0	0	0	0	0	0	0	0	0	70000
1021865392	0	0	0	0	0	0	0	0	0	0	0	0	0	0	0	0	0	0	0	0	0	0	0	0	0	310000
1021970139	0	0	0	0	0	0	0	0	0	0	0	0	0	0	0	0	0	0	0	0	0	0	0	10000	0	500000	0	240000	0	910000	260000	0	0	560000	1210000	480000	0	0	730000	910000	0	0	0	230000	1670000	0	640000	0	500000
1022071916	0	0	0	0	0	0	0	0	0	0	0	0	0	0	0	0	0	0	0	0	0	0	0	0	0	30000
9451684	0	0	0	0	0	0	0	0	0	0	0	0	0	0	0	0	0	0	0	0	0	0	0	0	220000	480000	700000	270000	240000	740000	580000	580000	260000	490000	1000000	1500000	110000	510000	0	0	0	0	0	950000	1450000	0	0	0	0
1017943261	0	0	0	0	0	0	0	0	0	0	0	0	0	0	0	0	0	0	0	0	0	0	0	0	0	460000	0	0	0	0	0	0	0	0	980000
1019775448	0	0	0	0	0	0	0	0	0	0	0	0	0	0	0	0	0	0	0	0	0	0	0	0	290000	120000	660000	160000	0	0	0	0	290000	0	920000	1670000	110000	610000	0	0	0	0	0	1020000	1510000	10000	0	0	0
12360509	0	0	0	0	0	0	0	0	0	0	0	0	0	0	0	0	0	0	0	0	0	0	0	0	0	340000
5883800	0	0	0	0	0	0	0	0	0	0	0	0	0	0	0	0	0	0	0	0	0	0	0	0	210000	480000	740000	0	0	0	0	0	140000	0	980000	1510000
1014966296	0	0	0	0	0	0	0	0	0	0	0	0	0	0	0	0	0	0	0	0	0	0	0	0	0	0	0	0	300000	0	750000	600000	0	0	0	0	110000	540000	580000	960000	580000	760000	1050000	1040000	1410000	290000	570000	870000	370000
966009	0	0	0	0	0	0	0	0	0	0	0	0	0	0	0	0	0	0	0	0	0	0	0	0	0	0	0	0	240000	0	590000	120000	0	0	0	0	110000	700000	760000	1050000	0	0	0	990000	1860000	320000	990000	520000	530000
10584760	0	0	0	0	0	0	0	0	0	0	0	0	0	0	0	0	0	0	0	0	0	0	0	0	220000	0	620000	290000	140000	730000	650000	0	270000	530000	0	330000	0	0	0	0	0	0	0	0	20000	0	0	0	0
3373902	0	0	0	0	0	0	0	0	0	0	0	0	0	0	0	0	0	0	0	0	0	0	0	0	0	0	500000	370000	10000	1400000	1000000	0	280000	1150000	0	0	0	0	0	0	0	0	0	0	0	0	0	0	0
1019637191	0	0	0	0	0	0	0	0	0	0	0	0	0	0	0	0	0	0	0	0	0	0	0	0	0	0	0	80000	120000	140000	10000	10000	100000	220000	0	0	0	0	0	0	0	0	0	0	0	0	0	0	0
1019507035	0	0	0	0	0	0	0	0	0	0	0	0	0	0	0	0	0	0	0	0	0	0	0	0	0	0	20000	20000	10000	240000	10000	30000	10000	70000	0	0	10000	30000	10000	20000	10000	60000	0	0	0	20000	30000	180000	20000
1020263975	0	0	0	0	0	0	0	0	0	0	0	0	0	0	0	0	0	0	0	0	0	0	0	0	0	0	40000	290000	240000	700000	550000	500000	270000	430000	0	0	110000	510000	0	0	850000	420000	0	940000	1410000	30000	0	0	0
1020505222	0	0	0	0	0	0	0	0	0	0	0	0	0	0	0	0	0	0	0	0	0	0	0	0	0	0	400000	260000	210000	470000	280000	260000	160000	520000	0	0	70000	290000	370000	570000	610000	410000	570000	600000	730000	180000	300000	260000	250000
1016028886	0	0	0	0	0	0	0	0	0	0	0	0	0	0	0	0	0	0	0	0	0	0	0	0	120000	0	330000	150000	130000	350000	280000	260000	140000	220000	0	480000	0	0	0	0	0	0	0	490000	650000	0	0	0	0
1020541338	0	0	0	0	0	0	0	0	0	0	0	0	0	0	0	0	0	0	0	0	0	0	0	0	0	0	0	1280000	510000	1950000	780000	2540000	3180000	350000	0	0	110000	410000	0	0	0	0	0	1690000	2260000	0	0	0	0
1018919368	0	0	0	0	0	0	0	0	0	0	0	0	0	0	0	0	0	0	0	0	0	0	0	0	0	0	0	170000	130000	470000	770000	280000	150000	300000	0	0	0	0	0	0	0	0	0	500000	490000	0	0	0	0
1020938957	0	0	0	0	0	0	0	0	0	0	0	0	0	0	0	0	0	0	0	0	0	0	0	0	0	0	0	290000	240000	740000	550000	500000	280000	450000	0	0	30000	220000	0	0	0	0	0	0	470000	90000	60000	0	10000
1021197648	0	0	0	0	0	0	0	0	0	0	0	0	0	0	0	0	0	0	0	0	0	0	0	0	0	0	0	0	0	0	0	0	0	0	0	0	110000	530000	0	0	0	0	0	1470000	920000	250000	140000	0	0
1015975408	0	0	0	0	0	0	0	0	0	0	0	0	0	0	0	0	0	0	0	0	0	0	0	0	0	0	0	0	0	0	0	0	0	0	0	0	340000	50000	740000	550000	900000	420000	10000	1440000	2920000	330000	640000	0	550000
1019548307	0	0	0	0	0	0	0	0	0	0	0	0	0	0	0	0	0	0	0	0	0	0	0	0	0	0	0	0	0	0	0	0	0	0	0	0	140000	650000	780000	330000	1160000	350000	0	1090000	1830000	420000	630000	0	450000
1019950478	0	0	0	0	0	0	0	0	0	0	0	0	0	0	0	0	0	0	0	0	0	0	0	0	0	0	0	0	0	0	0	0	0	0	0	0	120000	530000	550000	960000	850000	420000	0	0	0	290000	550000	520000	360000
1020207741	0	0	0	0	0	0	0	0	0	0	0	0	0	0	0	0	0	0	0	0	0	0	0	0	0	0	0	0	0	0	0	0	0	0	0	0	20000	0	0	0	0	0	0	600000	1030000	0	0	0	0
1020352836	0	0	0	0	0	0	0	0	0	0	0	0	0	0	0	0	0	0	0	0	0	0	0	0	0	0	0	0	0	0	0	0	0	0	0	0	70000	290000	0	0	0	170000	0	600000	850000	0	0	80000	0
1021551575	0	0	0	0	0	0	0	0	0	0	0	0	0	0	0	0	0	0	0	0	0	0	0	0	0	0	0	0	0	0	0	0	0	0	0	0	390000	20000	0	0	0	0	0	1030000	1830000	0	0	0	0
1021552048	0	0	0	0	0	0	0	0	0	0	0	0	0	0	0	0	0	0	0	0	0	0	0	0	0	0	0	0	0	0	0	0	0	0	0	0	80000	520000	0	0	0	0	0	1030000	1590000	10000	0	0	0
1018951138	0	0	0	0	0	0	0	0	0	0	0	0	0	0	0	0	0	0	0	0	0	0	0	0	220000	0	1120000	330000	0	720000	0	0	300000	200000	0	990000	120000	310000	600000	970000	960000	450000	1160000	950000	1430000	330000	700000	570000	450000
1018984053	0	0	0	0	0	0	0	0	0	0	0	0	0	0	0	0	0	0	0	0	0	0	0	0	0	0	0	0	0	0	0	0	0	0	0	0	170000	150000	540000	50000	0	0	0	0	900000	270000	590000	0	380000
1021835432	0	0	0	0	0	0	0	0	0	0	0	0	0	0	0	0	0	0	0	0	0	0	0	0	0	0	0	0	0	0	0	0	0	0	0	0	100000	240000	0	0	0	0	0	380000	510000	0	0	0	0
1022001573	0	0	0	0	0	0	0	0	0	0	0	0	0	0	0	0	0	0	0	0	0	0	0	0	0	0	0	0	0	0	0	0	0	0	0	0	30000	0	0	0	0	0	0	930000	1020000	0	0	0	0
1019437117	0	0	0	0	0	0	0	0	0	0	0	0	0	0	0	0	0	0	0	0	0	0	0	0	0	0	0	0	0	0	0	0	0	0	0	0	110000	510000	570000	950000	850000	410000	1470000	0	310000	290000	1110000	510000	370000
1020886142	0	0	0	0	0	0	0	0	0	0	0	0	0	0	0	0	0	0	0	0	0	0	0	0	0	0	0	0	0	0	0	0	0	0	0	0	30000	0	0	0	0	0	0	0	0	0	0	0	0
1021012012	0	0	0	0	0	0	0	0	0	0	0	0	0	0	0	0	0	0	0	0	0	0	0	0	0	0	0	0	0	0	0	0	0	0	0	0	80000	210000	360000	230000	550000	230000	0	460000	980000	100000	300000	260000	160000
1021077495	0	0	0	0	0	0	0	0	0	0	0	0	0	0	0	0	0	0	0	0	0	0	0	0	0	0	0	0	0	0	0	0	0	0	0	0	100000	170000	0	0	0	0	0	10000	630000	230000	600000	0	130000
1021751135	0	0	0	0	0	0	0	0	0	0	0	0	0	0	0	0	0	0	0	0	0	0	0	0	0	0	0	290000	0	750000	280000	0	270000	300000	0	0	10000	0	0	0	0	0	0	1160000	1560000	0	0	0	0
1021776064	0	0	0	0	0	0	0	0	0	0	0	0	0	0	0	0	0	0	0	0	0	0	0	0	0	0	0	0	0	0	0	0	0	0	0	0	110000	240000	250000	0	0	0	0	960000	1680000	10000	540000	0	360000
12268782	0	0	0	0	0	0	0	0	0	0	0	0	0	0	0	0	0	0	0	0	0	0	0	0	0	0	0	0	0	0	0	0	0	0	0	0	10000	40000	10000	40000	20000	20000	10000	10000	10000	10000	10000	40000	30000
8174994	0	0	0	0	0	0	0	0	0	0	0	0	0	0	0	0	0	0	0	0	0	0	0	0	0	0	0	0	0	0	0	0	0	0	0	0	110000	40000	0	0	0	0	0	960000	1500000	0	0	0	0
1020226842	0	0	0	0	0	0	0	0	0	0	0	0	0	0	0	0	0	0	0	0	0	0	0	0	0	0	0	0	0	0	0	0	0	0	0	0	110000	1040000	580000	990000	1310000	460000	1140000	1000000	1480000	300000	890000	530000	400000
1020576323	0	0	0	0	0	0	0	0	0	0	0	0	0	0	0	0	0	0	0	0	0	0	0	0	0	0	0	0	0	0	0	0	0	0	0	0	90000	0	360000	0	0	0	0	0	550000	150000	0	0	290000
1020807337	0	0	0	0	0	0	0	0	0	0	0	0	0	0	0	0	0	0	0	0	0	0	0	0	0	0	0	0	0	0	0	0	0	0	0	0	80000	100000	0	0	0	0	0	760000	1020000	0	0	0	0
1021303797	0	0	0	0	0	0	0	0	0	0	0	0	0	0	0	0	0	0	0	0	0	0	0	0	20000	0	0	0	0	0	0	0	0	0	0	0	200000	400000	0	0	0	0	0	590000	860000	210000	300000	0	0
1021391923	0	0	0	0	0	0	0	0	0	0	0	0	0	0	0	0	0	0	0	0	0	0	0	0	0	0	0	0	0	0	0	0	0	0	0	0	10000	10000	0	0	0	0	0	200000	720000	0	0	0	0
1021943865	0	0	0	0	0	0	0	0	0	0	0	0	0	0	0	0	0	0	0	0	0	0	0	0	0	0	0	0	0	0	0	0	0	0	0	0	210000	40000	650000	430000	710000	290000	720000	580000	1200000	20000	630000	440000	220000
9554121	0	0	0	0	0	0	0	0	0	0	0	0	0	0	0	0	0	0	0	0	0	0	0	0	0	0	0	0	0	0	0	0	0	0	0	0	90000	530000	10000	30000	890000	420000	20000	0	0	20000	0	530000	400000
1019523292	0	0	0	0	0	0	0	0	0	0	0	0	0	0	0	0	0	0	0	0	0	0	0	0	0	0	0	0	0	0	0	0	0	0	0	0	110000	520000	570000	980000	0	0	0	110000	1400000	290000	480000	470000	370000
1019788422	0	0	0	0	0	0	0	0	0	0	0	0	0	0	0	0	0	0	0	0	0	0	0	0	0	0	0	0	0	0	0	0	0	0	0	0	110000	920000	570000	20000	0	0	0	950000	1390000	300000	550000	0	380000
1020290044	0	0	0	0	0	0	0	0	0	0	0	0	0	0	0	0	0	0	0	0	0	0	0	0	290000	0	480000	0	0	0	0	0	0	0	0	0	110000	290000	220000	580000	0	0	0	940000	1320000	300000	480000	0	10000
1020819142	0	0	0	0	0	0	0	0	0	0	0	0	0	0	0	0	0	0	0	0	0	0	0	0	0	0	0	0	0	0	0	0	0	0	0	0	140000	580000	0	0	0	0	0	0	1810000	150000	0	0	0
1020999286	0	0	0	0	0	0	0	0	0	0	0	0	0	0	0	0	0	0	0	0	0	0	0	0	0	0	0	0	0	0	0	0	0	0	0	0	80000	270000	570000	310000	520000	70000	820000	830000	1200000	30000	310000	270000	240000
1021382993	0	0	0	0	0	0	0	0	0	0	0	0	0	0	0	0	0	0	0	0	0	0	0	0	0	0	0	0	0	0	0	0	0	0	0	0	140000	560000	750000	1180000	1160000	470000	1380000	140000	1840000	130000	650000	560000	590000
1783401	0	0	0	0	0	0	0	0	0	0	0	0	0	0	0	0	0	0	0	0	0	0	0	0	0	0	0	0	0	0	0	0	0	0	0	0	120000	510000	570000	520000	0	0	0	950000	1560000	290000	570000	0	380000
5883684	0	0	0	0	0	0	0	0	0	0	0	0	0	0	0	0	0	0	0	0	0	0	0	0	0	0	0	0	0	0	0	0	0	0	0	0	110000	510000	0	0	0	0	0	1020000	1410000	290000	240000	0	0
1017788005	0	0	0	0	0	0	0	0	0	0	0	0	0	0	0	0	0	0	0	0	0	0	0	0	0	0	0	0	0	0	0	0	0	0	0	0	20000	50000	30000	0	0	0	0	0	0	30000	0	510000	20000
1019409526	0	0	0	0	0	0	0	0	0	0	0	0	0	0	0	0	0	0	0	0	0	0	0	0	0	0	0	0	0	0	0	0	0	0	0	0	10000	0	0	0	0	0	0	20000	20000	0	0	0	0
1019868130	0	0	0	0	0	0	0	0	0	0	0	0	0	0	0	0	0	0	0	0	0	0	0	0	0	0	0	0	0	0	0	0	0	0	0	0	290000	860000	1090000	100000	100000	80000	480000	0	2650000	460000	660000	0	780000
1020389222	0	0	0	0	0	0	0	0	0	0	0	0	0	0	0	0	0	0	0	0	0	0	0	20000	0	0	0	0	0	0	0	0	0	0	0	0	190000	670000	620000	1100000	940000	420000	270000	950000	1420000	290000	630000	530000	390000
1020484842	0	0	0	0	0	0	0	0	0	0	0	0	0	0	0	0	0	0	0	0	0	0	0	0	0	0	0	0	0	0	0	0	0	0	0	0	250000	730000	0	0	0	0	0	1560000	2740000	90000	10000	0	0
1020818346	0	0	0	0	0	0	0	0	0	0	0	0	0	0	0	0	0	0	0	0	0	0	0	0	0	0	0	0	0	0	0	0	0	0	0	0	80000	10000	60000	70000	10000	20000	0	40000	1230000	90000	20000	0	50000
1021393772	0	0	0	0	0	0	0	0	0	0	0	0	0	0	0	0	0	0	0	0	0	0	0	0	0	0	0	0	0	0	0	0	0	0	0	0	110000	490000	420000	0	0	0	0	0	0	280000	560000	0	380000
1022038001	0	0	0	0	0	0	0	0	0	0	0	0	0	0	0	0	0	0	0	0	0	0	0	0	0	0	0	0	0	0	0	0	0	0	0	0	20000	10000	0	0	0	0	0	950000	1410000	0	0	0	0
1022107914	0	0	0	0	0	0	0	0	0	0	0	0	0	0	0	0	0	0	0	0	0	0	0	0	0	0	0	0	0	0	0	0	0	0	0	0	110000	260000	0	0	0	0	70000	670000	1510000	310000	400000	0	260000
1017240641	0	0	0	0	0	0	0	0	0	0	0	0	0	0	0	0	0	0	0	0	0	0	0	0	0	0	0	0	0	0	0	10000	10000	0	0	0	120000	500000	570000	260000	650000	0	1050000	940000	1390000	330000	560000	0	360000
1017872745	0	0	0	0	0	0	0	0	0	0	0	0	0	0	0	0	0	0	0	0	0	0	0	0	0	0	0	0	0	0	0	0	0	0	0	0	90000	170000	260000	310000	1040000	640000	1050000	780000	1160000	240000	500000	770000	320000
1018023371	0	0	0	0	0	0	0	0	0	0	0	0	0	0	0	0	0	0	0	0	0	0	0	0	0	0	0	0	0	0	0	0	0	0	0	0	110000	550000	590000	20000	0	0	0	460000	1700000	430000	420000	0	300000
1020466100	0	0	0	0	0	0	0	0	0	0	0	0	0	0	0	0	0	0	0	0	0	0	0	0	0	0	0	0	0	0	0	0	0	0	0	0	90000	410000	0	0	0	0	0	110000	0	0	0	0	0
1020592234	0	0	0	0	0	0	0	0	0	0	0	0	0	0	0	0	0	0	0	0	0	0	0	0	0	0	0	0	0	0	0	0	0	0	0	0	150000	180000	690000	310000	0	0	0	0	1880000	290000	620000	540000	380000
2582557	0	0	0	0	0	0	0	0	0	0	0	0	0	0	0	0	0	0	0	0	0	0	0	0	0	0	0	150000	0	0	0	0	20000	0	0	0	180000	1570000	690000	40000	0	0	0	2360000	2520000	740000	1170000	0	740000
1015055611	0	0	0	0	0	0	0	0	0	0	0	0	0	0	0	0	0	0	0	0	0	0	0	0	0	0	0	0	0	0	0	0	0	0	0	0	0	0	1120000	1250000	0	0	0	920000	1040000	450000	790000	520000	420000
1017813482	0	0	0	0	0	0	0	0	0	0	0	0	0	0	0	0	0	0	0	0	0	0	0	0	0	0	0	0	0	0	0	0	0	0	0	0	0	0	280000	30000	0	20000	0	0	0	220000	690000	0	420000
1019266837	0	0	0	0	0	0	0	0	0	0	0	0	0	0	0	0	0	0	0	0	0	0	0	0	0	0	0	0	0	0	0	0	0	0	0	0	0	0	460000	760000	510000	300000	0	50000	0	50000	0	450000	0
1020352840	0	0	0	0	0	0	0	0	0	0	0	0	0	0	0	0	0	0	0	0	0	0	0	0	0	0	0	0	0	0	0	0	0	0	0	0	0	0	570000	180000	0	0	0	0	0	20000	550000	0	430000
1019635526	0	0	0	0	0	0	0	0	0	0	0	0	0	0	0	0	0	0	0	0	0	0	0	0	0	0	0	0	0	0	0	0	0	0	0	0	0	0	570000	970000	0	40000	0	0	0	30000	560000	520000	370000
1019952997	0	0	0	0	0	0	0	0	0	0	0	0	0	0	0	0	0	0	0	0	0	0	0	0	0	0	0	0	0	0	0	0	0	0	0	0	0	0	560000	980000	850000	420000	0	0	0	0	310000	940000	370000
1020185111	0	0	0	0	0	0	0	0	0	0	0	0	0	0	0	0	0	0	0	0	0	0	0	0	0	0	0	0	0	0	0	0	0	0	0	0	0	0	0	340000	0	0	0	880000	0	290000	350000	0	0
1020351530	0	0	0	0	0	0	0	0	0	0	0	0	0	0	0	0	0	0	0	0	0	0	0	0	0	0	0	0	0	0	0	0	0	0	0	0	0	0	350000	40000	0	420000	0	0	0	0	360000	210000	300000
1022105906	0	0	0	0	0	0	0	0	0	0	0	0	0	0	0	0	0	0	0	0	0	0	0	0	0	0	0	0	0	0	0	0	0	0	0	0	0	0	280000	620000	340000	0	640000	0	0	140000	300000	30000	290000
2633381	0	0	0	0	0	0	0	0	0	0	0	0	0	0	0	0	0	0	0	0	0	0	0	0	0	0	0	0	0	0	0	0	0	0	0	0	0	0	150000	510000	850000	420000	0	0	0	0	0	550000	0
5348310	0	0	0	0	0	0	0	0	0	0	0	0	0	0	0	0	0	0	0	0	0	0	0	0	0	0	0	0	0	0	0	0	0	0	0	0	0	0	40000	40000	60000	30000	30000	0	0	0	30000	30000	30000
1021198353	0	0	0	0	0	0	0	0	0	0	0	0	0	0	0	0	0	0	0	0	0	0	0	0	0	0	0	0	0	0	0	0	0	0	0	0	0	0	560000	820000	910000	290000	760000	0	0	180000	370000	430000	290000
1021613111	0	0	0	0	0	0	0	0	0	0	0	0	0	0	0	0	0	0	0	0	0	0	0	0	0	0	0	0	0	0	0	0	0	0	0	0	0	0	0	80000
1021648737	0	0	0	0	0	0	0	0	0	0	0	0	0	0	0	0	0	0	0	0	0	0	0	0	0	0	0	0	0	0	0	0	0	0	0	0	0	0	40000	1300000	510000	390000	0	10000	0	60000	0	920000	240000
1021654369	0	0	0	0	0	0	0	0	0	0	0	0	0	0	0	0	0	0	0	0	0	0	0	0	0	0	0	0	0	0	0	0	0	0	0	0	0	20000	690000	1070000	170000	420000	0	0	0	0	550000	520000	390000
1585131	0	0	0	0	0	0	0	0	0	0	0	0	0	0	0	0	0	0	0	0	0	0	0	0	0	0	0	0	0	0	0	0	0	0	0	0	0	0	0	180000	790000	140000	980000	0	0	0	0	400000	0
3243488	0	0	0	0	0	0	0	0	0	0	0	0	0	0	0	0	0	0	0	0	0	0	0	0	0	0	0	0	0	0	0	0	0	0	0	0	0	0	210000	100000	0	0	0	0	0	0	0	10000
5464465	0	0	0	0	0	0	0	0	0	0	0	0	0	0	0	0	0	0	0	0	0	0	0	0	0	0	0	0	0	0	0	0	0	0	0	0	0	0	0	20000	0	0	0	0	0	0	0	0	0
1021740329	0	0	0	0	0	0	0	0	0	0	0	0	0	0	0	0	0	0	0	0	0	0	0	0	0	0	0	0	0	0	0	0	0	0	0	0	0	0	490000	680000	40000	0	0	0	0	260000	380000	170000	410000
1016316437	0	0	0	0	0	0	0	0	0	0	0	0	0	0	0	0	0	0	0	0	0	0	0	0	0	0	0	0	0	0	0	0	0	0	0	0	0	0	240000	160000	0	0	0	0	0	290000	560000	250000	370000
1021621432	0	0	0	0	0	0	0	0	0	0	0	0	0	0	0	0	0	0	0	0	0	0	0	0	0	0	0	0	0	0	0	0	0	0	0	0	0	0	360000	20000	720000	150000	190000	770000	600000	150000	420000	0	370000
1018769153	0	0	0	0	0	0	0	0	0	0	0	0	0	0	0	0	0	0	0	0	0	0	0	0	0	0	0	0	0	0	0	0	0	0	0	0	0	0	20000	850000	40000	100000	30000	1050000	780000	50000	0	400000	0
1020883559	0	0	0	0	0	0	0	0	0	0	0	0	0	0	0	0	0	0	0	0	0	0	0	0	0	0	0	0	0	0	0	0	0	0	0	0	0	0	0	310000	0	0	0	0	0	40000	0	600000	10000
1021788015	0	0	0	0	0	0	0	0	0	0	0	0	0	0	0	0	0	0	0	0	0	0	0	0	0	0	0	0	0	0	0	0	0	0	0	0	0	0	590000	520000	1020000	420000	1230000	0	0	290000	550000	510000	370000
1018724508	0	0	0	0	0	0	0	0	0	0	0	0	0	0	0	0	0	0	0	0	0	0	0	0	0	0	0	0	0	0	0	0	0	0	0	0	0	0	660000	400000	0	0	0	0	0	200000	470000	0	570000
1018771643	0	0	0	0	0	0	0	0	0	0	0	0	0	0	0	0	0	0	0	0	0	0	0	0	0	0	0	0	0	0	0	0	0	0	0	0	0	0	20000	650000	690000	300000	560000	0	0	0	230000	210000	370000
1019912852	0	0	0	0	0	0	0	0	0	0	0	0	0	0	0	0	0	0	0	0	0	0	0	0	0	0	0	0	0	0	0	0	0	0	0	0	0	0	290000	490000	0	0	0	110000	0	170000	330000	50000	200000
1021312693	0	0	0	0	0	0	0	0	0	0	0	0	0	0	0	0	0	0	0	0	0	0	0	0	0	0	0	0	0	0	0	0	0	0	0	0	0	0	730000	670000	780000	60000	540000	70000	0	110000	600000	0	430000
1021368595	0	0	0	0	0	0	0	0	0	0	0	0	0	0	0	0	0	0	0	0	0	0	0	0	0	0	0	0	0	0	0	0	0	0	0	0	0	0	460000	800000	60000	300000	0	0	0	320000	240000	410000	310000
1022036501	0	0	0	0	0	0	0	0	0	0	0	0	0	0	0	0	0	0	0	0	0	0	0	0	0	0	0	0	0	0	0	0	0	0	0	0	0	0	650000	290000	0	0	0	0	20000	300000	700000	0	730000
1019257817	0	0	0	0	0	0	0	0	0	0	0	0	0	0	0	0	0	0	0	0	0	0	0	0	0	0	0	0	0	0	0	0	0	0	0	0	0	0	0	0	0	0	0	0	0	10000	210000	0	0
1019572626	0	0	0	0	0	0	0	0	0	0	0	0	0	0	0	0	0	0	0	0	0	0	0	0	0	0	0	290000	0	640000	0	0	200000	430000	0	0	0	0	0	0	0	0	0	0	0	320000	550000	0	170000
1020803117	0	0	0	0	0	0	0	0	0	0	0	0	0	0	0	0	0	0	0	0	0	0	0	0	0	0	0	0	0	0	0	0	0	0	0	0	0	0	0	0	0	0	0	560000	0	10000	0	0	0
1015520011	0	0	0	0	0	0	0	0	0	0	0	0	0	0	0	0	0	0	0	0	0	0	0	0	0	0	0	0	0	0	0	0	10000	0	0	0	0	0	0	0	0	0	750000	0	0	10000	0	0	0
1019881280	0	0	0	0	0	0	0	0	0	0	0	0	0	0	0	0	0	0	0	0	0	0	0	0	0	0	0	0	0	0	0	0	0	0	0	0	0	0	0	0	0	0	0	0	0	250000
1021373306	0	0	0	0	0	0	0	0	0	0	0	0	0	0	0	0	0	0	0	0	0	0	0	0	0	0	0	0	0	0	0	0	0	0	0	0	0	0	0	0	320000	150000	0	40000	0	10000	0	0	0
1021426736	0	0	0	0	0	0	0	0	0	0	0	0	0	0	0	0	0	0	0	0	0	0	0	0	0	0	0	0	0	0	0	0	0	0	0	0	0	0	0	0	0	0	0	0	0	290000
1021711320	0	0	0	0	0	0	0	0	0	0	0	0	0	0	0	0	0	0	0	0	0	0	0	0	0	0	0	0	0	0	0	0	0	0	0	0	0	560000	0	0	0	0	0	0	0	130000	0	0	0
1021814148	0	0	0	0	0	0	0	0	0	0	0	0	0	0	0	0	0	0	0	0	0	0	0	0	0	0	0	0	0	0	0	0	0	0	0	0	0	0	0	0	0	0	0	0	0	280000	200000	0	360000
1018328277	0	0	0	0	0	0	0	0	0	0	0	0	0	0	0	0	0	0	0	0	0	0	0	0	0	0	0	0	0	0	0	0	0	0	0	0	0	0	0	0	0	0	0	780000	30000	200000	240000	0	0
1021310605	0	0	0	0	0	0	0	0	0	0	0	0	0	0	0	0	0	0	0	0	0	0	0	0	0	0	0	0	0	0	0	0	0	0	0	0	0	0	0	0	890000	380000	0	0	0	160000	0	0	0
5279006	0	0	0	0	0	0	0	0	0	0	0	0	0	0	0	0	0	0	0	0	0	0	0	0	0	0	0	0	0	0	0	0	0	0	0	0	0	0	470000	0	0	0	0	0	0	190000	600000	0	380000
1020629053	0	0	0	0	0	0	0	0	0	0	0	0	0	0	0	0	0	0	0	0	0	0	0	0	0	0	0	0	0	0	0	0	0	0	0	0	0	0	0	0	500000	800000	0	850000	0	290000	10000	0	0
1020815632	0	0	0	0	0	0	0	0	0	0	0	0	0	0	0	0	0	0	0	0	0	0	0	0	0	0	0	0	0	0	0	0	0	0	0	0	0	0	0	0	0	0	0	20000	0	10000	0	0	0
1021128619	0	0	0	0	0	0	0	0	0	0	0	0	0	0	0	0	0	0	0	0	0	0	0	0	0	0	0	0	0	0	0	0	0	0	0	0	0	0	0	0	0	0	0	0	0	60000	0	0	0
1021621947	0	0	0	0	0	0	0	0	0	0	0	0	0	0	0	0	0	0	0	0	0	0	0	0	0	0	0	0	0	0	0	0	0	0	0	0	0	0	20000	0	0	0	0	0	0	160000	230000	0	280000
3633217	0	0	0	0	0	0	0	0	0	0	0	0	0	0	0	0	0	0	0	0	0	0	0	0	0	0	0	0	0	0	0	0	0	0	0	0	0	0	0	0	0	0	0	80000	0	10000	140000	0	0
1016435729	0	0	0	0	0	0	0	0	0	0	0	0	0	0	0	0	0	0	0	0	0	0	0	0	0	0	0	0	0	0	0	0	0	0	0	0	0	0	0	0	0	0	0	0	0	30000	10000	0	0
1017764590	0	0	0	0	0	0	0	0	0	0	0	0	0	0	0	0	0	0	0	0	0	0	0	0	0	0	0	0	0	0	0	0	0	0	0	0	0	0	0	0	0	0	0	0	0	10000	0	0	0
1020147308	0	0	0	0	0	0	0	0	0	0	0	0	0	0	0	0	0	0	0	0	0	0	0	0	0	0	0	0	0	0	0	0	0	0	0	0	0	0	0	0	0	0	0	0	0	310000	40000
1020467150	0	0	0	0	0	0	0	0	0	0	0	0	0	0	0	0	0	0	0	0	0	0	0	0	0	0	0	0	0	0	0	0	0	0	0	0	0	0	0	0	0	0	0	0	0	200000	10000	0	0
1021146809	0	0	0	0	0	0	0	0	0	0	0	0	0	0	0	0	0	0	0	0	0	0	0	0	0	0	0	0	0	0	0	0	0	0	0	0	0	0	0	0	0	0	0	0	0	230000	10000
1021521417	0	0	0	0	0	0	0	0	0	0	0	0	0	0	0	0	0	0	0	0	0	0	0	0	0	0	0	0	0	0	0	0	0	0	0	0	0	0	0	0	0	0	0	140000	0	130000	0	0	0
1021565725	0	0	0	0	0	0	0	0	0	0	0	0	0	0	0	0	0	0	0	0	0	0	0	0	0	0	0	0	0	0	0	0	0	0	0	0	0	0	0	0	0	0	0	0	0	270000	560000	0	10000
1021579313	0	0	0	0	0	0	0	0	0	0	0	0	0	0	0	0	0	0	0	0	0	0	0	0	0	0	0	0	0	0	0	0	0	0	0	0	0	0	0	0	0	10000	0	0	0	20000	0	0	0
1021714558	0	0	0	0	0	0	0	0	0	0	0	0	0	0	0	0	0	0	0	0	0	0	0	0	0	0	0	0	0	0	0	0	0	0	0	0	0	0	0	0	0	0	0	0	0	10000	0	0	0
12445264	0	0	0	0	0	0	0	0	0	0	0	0	0	0	0	0	0	0	0	0	0	0	0	0	0	0	0	0	0	0	0	0	0	0	0	0	0	0	0	0	0	0	0	0	0	50000	0	0	30000
7015298	0	0	0	0	0	0	0	0	0	0	0	0	0	0	0	0	0	0	0	0	0	0	0	0	0	0	0	0	0	0	0	0	0	0	0	0	0	0	0	0	0	0	0	0	0	310000	160000
1019324988	0	0	0	0	0	0	0	0	0	0	0	0	0	0	0	0	0	0	0	0	0	0	0	0	0	0	0	0	0	0	0	0	0	0	0	0	0	0	0	0	0	0	0	0	0	60000
1020426369	0	0	0	0	0	0	0	0	0	0	0	0	0	0	0	0	0	0	0	0	0	0	0	0	0	0	0	0	0	0	0	0	0	0	0	0	0	0	0	0	0	0	0	0	0	100000	0	0	0
1021264313	0	0	0	0	0	0	0	0	0	0	0	0	0	0	0	0	0	0	0	0	0	0	0	0	0	0	0	0	0	0	0	0	0	0	0	0	0	0	0	0	0	0	0	0	0	280000	20000	0	0
1021788653	0	0	0	0	0	0	0	0	0	0	0	0	0	0	0	0	0	0	0	0	0	0	0	0	0	0	0	0	0	0	0	0	0	0	0	0	0	0	0	0	0	0	0	0	0	160000
1019533165	0	0	0	0	0	0	0	0	0	0	0	0	0	0	0	0	0	0	0	0	0	0	0	0	0	0	0	0	0	0	0	0	0	0	0	0	0	0	0	0	1070000	430000	10000	0	0	320000	0	0	0
1021122423	0	0	0	0	0	0	0	0	0	0	0	0	0	0	0	0	0	0	0	0	0	0	0	0	0	0	0	0	0	0	0	0	0	0	0	0	0	0	0	0	0	0	0	0	10000	10000	220000	0	0
1021603698	0	0	0	0	0	0	0	0	0	0	0	0	0	0	0	0	0	0	0	0	0	0	0	0	0	0	0	0	0	0	0	0	0	0	0	0	0	0	0	0	1480000	440000	0	0	0	200000	10000	0	0
1021676119	0	0	0	0	0	0	0	0	0	0	0	0	0	0	0	0	0	0	0	0	0	0	0	0	0	0	0	0	0	0	0	0	0	0	0	0	0	0	0	0	0	0	0	0	0	40000	10000	0	20000
1022003053	0	0	0	0	0	0	0	0	0	0	0	0	0	0	0	0	0	0	0	0	0	0	0	0	0	0	0	0	0	0	0	0	0	0	0	0	0	0	0	0	0	0	0	0	0	20000
1018437410	0	0	0	0	0	0	0	0	0	0	0	0	0	0	0	0	0	0	0	0	0	0	0	0	0	0	0	0	0	0	0	0	0	0	0	0	0	0	0	0	910000	640000	110000	0	0	0	0	0	0
1021145005	0	0	0	0	0	0	0	0	0	0	0	0	0	0	0	0	0	0	0	0	0	0	0	0	0	0	0	0	0	0	0	0	0	0	0	0	0	0	0	0	690000	280000	0	0	0	0	0	0	0
1021543887	0	0	0	0	0	0	0	0	0	0	0	0	0	0	0	0	0	0	0	0	0	0	0	0	0	0	0	0	0	0	0	0	0	0	0	0	0	0	0	0	960000	490000	0	0	0	0	0	0	0
1021622320	0	0	0	0	0	0	0	0	0	0	0	0	0	0	0	0	0	0	0	0	0	0	0	0	0	0	0	0	0	0	0	0	0	0	0	0	0	0	0	0	1260000	470000	340000	0	0	0	0	0	0
1022315834	0	0	0	0	0	0	0	0	0	0	0	0	0	0	0	0	0	0	0	0	0	0	0	0	0	0	0	0	0	0	0	0	0	0	0	0	0	0	0	0	0	0	0	0	0	0	0	0	0
11652048	0	0	0	0	0	0	0	0	0	0	0	0	0	0	0	0	0	0	0	0	0	0	0	0	0	0	0	0	0	0	0	0	0	0	0	0	0	0	0	0	0	170000	0	0	0	0	0	0	0
1016551676	0	0	0	0	0	0	0	0	0	0	0	0	0	0	0	0	0	0	0	0	0	0	0	0	0	0	0	0	0	0	0	0	0	0	0	0	0	0	0	0	0	0	0	0	0	0	0	0	0
1019718524	0	0	0	0	0	0	0	0	0	0	0	0	0	0	0	0	0	0	0	0	0	0	0	0	0	0	0	0	0	0	0	0	0	0	0	0	0	0	0	0	270000	220000	0	10000	0	0	0	260000	0
1020678970	0	0	0	0	0	0	0	0	0	0	0	0	0	0	0	0	0	0	0	0	0	0	0	0	0	0	0	0	0	0	0	0	0	0	0	0	0	0	0	0	880000	420000	1050000	0	0	0	0	0	0
1021500472	0	0	0	0	0	0	0	0	0	0	0	0	0	0	0	0	0	0	0	0	0	0	0	0	0	0	0	0	0	0	0	0	0	0	0	0	0	0	0	0	0	0	0	0	0	0	0	0	0
1445084	0	0	0	0	0	0	0	0	0	0	0	0	0	0	0	0	0	0	0	0	0	0	0	0	0	0	0	0	0	0	0	0	0	0	0	0	0	0	0	0	860000	450000	1080000	0	0	0	0	0	0
1821053	0	0	0	0	0	0	0	0	0	0	0	0	0	0	0	0	0	0	0	0	0	0	0	0	0	0	0	0	0	0	0	0	0	0	0	0	0	0	0	0	20000	30000	0	0	30000	0	0	0	0
1021047323	0	0	0	0	0	0	0	0	0	0	0	0	0	0	0	0	0	0	0	0	0	0	0	0	0	0	0	0	0	0	0	0	0	0	0	0	0	0	0	0	0	360000	0	0	0	0	0	0	0
1021590610	0	0	0	0	0	0	0	0	0	0	0	0	0	0	0	0	0	0	0	0	0	0	0	0	0	0	0	0	0	0	0	0	140000	0	0	0	0	0	0	0	50000	420000	0	30000	0	0	0	0	0
1021620885	0	0	0	0	0	0	0	0	0	0	0	0	0	0	0	0	0	0	0	0	0	0	0	0	0	0	0	0	0	0	0	0	0	0	0	0	0	0	0	0	0	0	0	0	0	0	0	0	0
12812928	0	0	0	0	0	0	0	0	0	0	0	0	0	0	0	0	0	0	0	0	0	0	0	0	0	0	0	0	0	0	0	0	0	0	0	0	0	0	0	0	0	0	390000	0	80000	0	0	0	0
1017090657	0	0	0	0	0	0	0	0	0	0	0	0	0	0	0	0	0	0	0	0	0	0	0	0	0	0	0	0	0	0	0	0	0	0	0	0	0	0	0	0	690000	380000	780000	0	0	0	0	0	0
1019306624	0	0	0	0	0	0	0	0	0	0	0	0	0	0	0	0	0	0	0	0	0	0	0	0	0	0	0	0	0	0	0	0	0	0	0	0	0	0	0	0	0	0	0	0	0	0	0	0	0
1020397200	0	0	0	0	0	0	0	0	0	0	0	0	0	0	0	0	0	0	0	0	0	0	0	0	0	0	0	0	0	0	0	0	0	0	0	0	0	0	0	0	0	0	0	40000	0	0	0	0	0
1020871960	0	0	0	0	0	0	0	0	0	0	0	0	0	0	0	0	0	0	0	0	0	0	0	0	0	0	0	0	0	0	0	0	0	0	0	0	0	0	0	0	470000	400000	0	0	0	0	0	0	0
1021478995	0	0	0	0	0	0	0	0	0	0	0	0	0	0	0	0	0	0	0	0	0	0	0	0	0	0	0	0	0	0	0	0	0	0	0	0	0	0	0	0	0	0	0	0	0	0	0	0	0
11438106	0	0	0	0	0	0	0	0	0	0	0	0	0	0	0	0	0	0	0	0	0	0	0	0	0	0	0	0	0	0	0	0	0	0	0	0	0	0	0	0	0	0	0	0	0	0	0	0	0
1018915862	0	0	0	0	0	0	0	0	0	0	0	0	0	0	0	0	0	0	0	0	0	0	0	0	0	0	0	0	0	0	0	0	0	0	0	0	0	0	0	0	0	90000	0	0	0	0	0	0	0
1021427107	0	0	0	0	0	0	0	0	0	0	0	0	0	0	0	0	0	0	0	0	0	0	0	0	0	0	0	0	0	0	0	0	0	0	0	0	0	0	0	0	0	0	0	0	0	0	0	0	0
1021576696	0	0	0	0	0	0	0	0	0	0	0	0	0	0	0	0	0	0	0	0	0	0	0	0	0	0	0	0	0	0	0	0	0	0	0	0	0	0	0	0	0	40000	0	0	0	0	0	0	0
1021656776	0	0	0	0	0	0	0	0	0	0	0	0	0	0	0	0	0	0	0	0	0	0	0	0	0	0	0	0	0	0	0	0	0	0	0	0	0	0	0	0	0	140000	0	0	0	0	0	0	0
1022126281	0	0	0	0	0	0	0	0	0	0	0	0	0	0	0	0	0	0	0	0	0	0	0	0	0	0	0	0	0	0	0	0	0	0	0	0	0	0	0	0	650000	420000	0	870000	10000	0	0	0	0
12241094	0	0	0	0	0	0	0	0	0	0	0	0	0	0	0	0	0	0	0	0	0	0	0	0	0	0	0	0	0	0	0	0	0	0	0	0	0	0	0	0	640000	380000	770000	0	0	0	0	0	0
1733014	0	0	0	0	0	0	0	0	0	0	0	0	0	0	0	0	0	0	0	0	0	0	0	0	0	0	0	0	0	0	0	0	0	0	0	0	0	0	0	0	0	0	0	0	0	0	0	0	0
1014517041	0	0	0	0	0	0	0	0	0	0	0	0	0	0	0	0	0	0	0	0	0	0	0	0	0	0	0	0	0	0	0	0	0	0	0	0	0	0	0	0	850000	0	420000	0	0	0	0	0	0
1020621271	0	0	0	0	0	0	0	0	0	0	0	0	0	0	0	0	0	0	0	0	0	0	0	0	0	0	0	0	0	0	0	0	0	0	0	0	0	0	0	0	0	10000	0	0	0	0	0	0	0
1021729749	0	0	0	0	0	0	0	0	0	0	0	0	0	0	0	0	0	0	0	0	0	0	0	0	0	0	0	0	0	0	0	0	0	0	0	0	0	0	0	0	0	0	0	0	0	0	0	0	0
1632385	0	0	0	0	0	0	0	0	0	0	0	0	0	0	0	0	0	0	0	0	0	0	0	0	0	0	0	0	0	0	0	0	0	0	0	0	0	0	0	0	0	0	0	0	0	0	0	0	0
5254187	0	0	0	0	0	0	0	0	0	0	0	0	0	0	0	0	0	0	0	0	0	0	0	0	0	0	0	0	0	0	0	0	0	0	0	0	0	0	0	0	250000	170000	0	30000	0	0	0	0	0
1019675781	0	0	0	0	0	0	0	0	0	0	0	0	0	0	0	0	0	0	0	0	0	0	0	0	0	0	0	0	0	0	0	0	0	0	0	0	0	0	0	0	30000	0	0	0	0	0	0	0	0
1020246541	0	0	0	0	0	0	0	0	0	0	0	0	0	0	0	0	0	0	0	0	0	0	0	0	0	0	0	0	0	0	0	0	0	0	0	0	0	0	0	0	0	0	0	0	0	0	0	0	0
1020979430	0	0	0	0	0	0	0	0	0	0	0	0	0	0	0	0	0	0	0	0	0	0	0	0	0	0	0	0	0	0	0	0	0	0	0	0	0	0	0	0	0	0	0	0	0	0	0	0	0
6850767	0	0	0	0	0	0	0	0	0	0	0	0	0	0	0	0	0	0	0	0	0	0	0	0	0	0	0	0	0	0	0	0	0	0	0	0	0	0	0	0	0	0	0	0	0	0	0	0	0
1017184527	0	0	0	0	0	0	0	0	0	0	0	0	0	0	0	0	0	0	0	0	0	0	0	0	0	0	0	0	0	0	0	0	0	0	0	0	0	0	0	0	0	0	0	0	0	0	0	0	0
1019044281	0	0	0	0	0	0	0	0	0	0	0	0	0	0	0	0	0	0	0	0	0	0	0	0	0	0	0	0	0	0	0	0	0	0	0	0	0	0	0	0	0	0	170000	0	0	0	0	0	0
1020861918	0	0	0	0	0	0	0	0	0	0	0	0	0	0	0	0	0	0	0	0	0	0	0	0	0	0	0	0	0	0	0	0	0	0	0	0	0	0	0	0	0	40000	0	10000	0	0	0	0	0
1021331162	0	0	0	0	0	0	0	0	0	0	0	0	0	0	0	0	0	0	0	0	0	0	0	0	0	0	0	0	0	0	0	0	0	0	0	0	0	0	0	0	0	220000	0	0	0	0	0	0	0
1021782797	0	0	0	0	0	0	0	0	0	0	0	0	0	0	0	0	0	0	0	0	0	0	0	0	0	0	0	0	0	0	0	0	0	0	0	0	0	0	0	0	0	10000	0	0	0	0	0	0	0
1292149	0	0	0	0	0	0	0	0	0	0	0	0	0	0	0	0	0	0	0	0	0	0	0	0	220000	0	700000	0	0	0	0	0	0	0	0	1210000
1020654281	0	0	0	0	0	0	0	0	0	0	0	0	0	0	0	0	0	0	0	0	0	0	0	0	140000
1021643812	0	0	0	0	0	0	0	0	0	0	0	0	0	0	0	0	0	0	0	0	0	0	0	0	20000	0	0	0	0	0	0	0	0	0	0	1410000
10775066	0	0	0	0	0	0	0	0	0	0	0	0	0	0	0	0	0	0	0	0	0	0	0	0	230000	0	800000	0	0	0	0	0	10000	0	0	980000
2620169	0	0	0	0	0	0	0	0	0	0	0	0	0	0	0	0	0	0	0	0	0	0	0	0	210000	0	640000	280000	0	680000	0	0	270000	430000	0	1440000	0	0	0	0	0	0	0	740000	200000	0	0	0	0
10568892	0	0	0	0	0	0	0	0	0	0	0	0	0	0	0	0	0	0	0	0	0	0	0	0	0	0	230000	80000	0	0	0	0	150000
1018217093	0	0	0	0	0	0	0	0	0	0	0	0	0	0	0	0	0	0	0	0	0	0	0	0	0	0	0	30000	0	0	0	0	200000
9329643	0	0	0	0	0	0	0	0	0	0	0	0	0	0	0	0	0	0	0	0	0	0	0	0	0	0	0	190000	0	450000	0	0	180000	30000
1016563374	0	0	0	0	0	0	0	0	0	0	0	0	0	0	0	0	0	0	0	0	0	0	0	0	0	0	740000	620000	0	810000	0	0	300000	380000	0	0	0	0	0	0	0	0	0	320000	0	0	0	0	0
1021873613	0	0	0	0	0	0	0	0	0	0	0	0	0	0	0	0	0	0	0	0	0	0	0	0	0	0	0	170000	0	340000	0	0	140000
1875274	0	0	0	0	0	0	0	0	0	0	0	0	0	0	0	0	0	0	0	0	0	0	0	0	0	0	0	300000	0	440000	0	0	270000	0	0	0	0	0	0	0	0	0	0	240000	0	0	0	0	0
1019435323	0	0	0	0	0	0	0	0	0	0	0	0	0	0	0	0	0	0	0	0	0	0	0	0	0	0	0	0	0	0	0	20000	0	0	0	0	0	0	0	0	0	0	0	0	10000	0	0	0	0
1017988675	0	0	0	0	0	0	0	0	0	0	0	0	0	0	0	0	0	0	0	0	0	0	0	0	0	0	0	0	0	0	0	0	0	0	0	0	0	0	110000
12595711	0	0	0	0	0	0	0	0	0	0	0	0	0	0	0	0	0	0	0	0	0	0	0	0	0	0	0	0	0	0	0	0	0	0	0	0	0	0	140000	0	0	0	0	0	0	0	0	0	0
1017787648	0	0	0	0	0	0	0	0	0	0	0	0	0	0	0	0	0	0	0	0	0	0	0	0	0	0	0	0	0	0	0	0	0	0	0	0	0	110000	0	0	830000	50000	1010000	0	0	0	0	0	0
1020906009	0	0	0	0	0	0	0	0	0	0	0	0	0	0	0	0	0	0	0	0	0	0	0	0	0	0	0	0	0	0	0	0	0	0	0	0	0	0	0	0	170000	0	20000	0	0	0	0	0	0
1020526794	0	0	0	0	0	0	0	0	0	0	0	0	0	0	0	0	0	0	0	0	0	0	0	0	0	0	0	0	0	0	0	0	0	0	0	0	0	0	0	0	0	0	1020000	0	0	0	0	0	0
1019089469	0	0	0	0	0	0	0	0	0	0	0	0	0	0	0	0	0	0	0	0	0	0	0	0	0	0	0	0	0	0	0	0	0	0	0	0	0	0	0	0	0	0	20000	0	0	0	0	0	0
1020245212	0	0	0	0	0	0	0	0	0	0	0	0	0	0	0	0	0	0	0	0	0	0	0	0	0	0	0	0	0	0	0	0	0	0	0	0	0	0	0	0	0	0	20000	0	0	0	0	0	0
9580515	0	0	0	0	0	0	0	0	0	0	0	0	0	0	0	0	0	0	0	0	0	0	0	0	0	0	0	0	0	0	0	0	0	0	0	0	0	0	0	0	0	0	300000	0	0	0	0	0	0
1019636017	0	0	0	0	0	0	0	0	0	0	0	0	0	0	0	0	0	0	0	0	0	0	0	0	0	0	0	0	0	0	0	0	0	0	0	0	0	0	0	0	650000	0	1040000	0	0	0	0	0	0
533661	0	0	0	0	0	0	0	0	0	0	0	0	0	0	0	0	0	0	0	0	0	0	0	0	0	0	0	0	0	0	0	0	0	0	0	0	0	0	0	0	0	0	650000	0	0	0	0	0	0
1019775702	0	0	0	0	0	0	0	0	0	0	0	0	0	0	0	0	0	0	0	0	0	0	0	0	0	0	0	0	0	0	0	0	0	0	0	0	0	0	0	0	850000	0	1050000	0	0	0	0	0	0
1019895066	0	0	0	0	0	0	0	0	0	0	0	0	0	0	0	0	0	0	0	0	0	0	0	0	0	0	0	0	0	0	0	0	0	0	0	0	0	0	0	0	20000	0	750000	0	0	0	0	0	40000
1020050241	0	0	0	0	0	0	0	0	0	0	0	0	0	0	0	0	0	0	0	0	0	0	0	0	0	0	0	0	0	0	0	0	0	0	0	0	0	0	0	0	0	0	0	260000	620000	0	0	10000	0
1021806614	0	0	0	0	0	0	0	0	0	0	0	0	0	0	0	0	0	0	0	0	0	0	0	0	0	0	0	0	0	0	0	0	0	0	0	0	0	0	0	0	0	0	0	1470000	670000	0	0	0	0
1020623208	0	0	0	0	0	0	0	0	0	0	0	0	0	0	0	0	0	0	0	0	0	0	0	0	0	0	0	0	0	0	0	0	0	0	0	0	0	0	0	0	0	0	0	0	30000
5082742	0	0	0	0	0	0	0	0	0	0	0	0	0	0	0	0	0	0	0	0	0	0	0	0	0	0	0	0	0	0	0	0	0	0	0	0	0	0	0	0	0	0	0	0	80000	0	0	0	0
1019934835	0	0	0	0	0	0	0	0	0	0	0	0	0	0	0	0	0	0	0	0	0	0	0	0	0	0	0	0	0	0	0	0	0	0	0	0	0	0	0	0	0	0	0	720000	530000	0	0	0	0
1021569328	0	0	0	0	0	0	0	0	0	0	0	0	0	0	0	0	0	0	0	0	0	0	0	0	0	0	0	0	0	0	0	0	0	0	0	0	0	0	0	0	0	0	0	20000	170000	0	0	0	0
1022012779	0	0	0	0	0	0	0	0	0	0	0	0	0	0	0	0	0	0	0	0	0	0	0	0	0	0	0	0	0	0	0	0	0	0	0	0	0	0	0	0	0	0	0	980000	420000	0	0	0	0
1020147665	0	0	0	0	0	0	0	0	0	0	0	0	0	0	0	0	0	0	0	0	0	0	0	0	0	0	0	0	0	0	0	0	0	0	0	0	0	0	0	0	0	0	0	330000	400000	0	0	0	0
1020364662	0	0	0	0	0	0	0	0	0	0	0	0	0	0	0	0	0	0	0	0	0	0	0	0	0	0	0	0	0	0	0	0	0	0	0	0	0	0	0	0	0	0	0	900000	1040000	0	0	0	0
1021462932	0	0	0	0	0	0	0	0	0	0	0	0	0	0	0	0	0	0	0	0	0	0	0	0	0	0	0	0	0	0	0	0	0	0	0	0	0	0	0	0	0	0	0	310000	650000	0	0	0	0
1014516261	0	0	0	0	0	0	0	0	0	0	0	0	0	0	0	0	0	0	0	0	0	0	0	0	0	0	0	0	0	0	0	0	0	0	0	0	0	0	0	0	0	0	0	970000	630000	0	0	0	0
1018550818	0	0	0	0	0	0	0	0	0	0	0	0	0	0	0	0	0	0	0	0	0	0	0	0	0	0	0	0	0	0	0	0	0	0	0	0	0	0	0	0	0	0	0	940000	800000	0	0	0	0
1753081	0	0	0	0	0	0	0	0	0	0	0	0	0	0	0	0	0	0	0	0	0	0	0	0	0	0	0	0	0	0	0	0	0	0	0	0	0	0	0	0	0	0	0	0	10000	0	0	0	0
1020654370	0	0	0	0	0	0	0	0	0	0	0	0	0	0	0	0	0	0	0	0	0	0	0	0	0	0	0	0	0	0	0	0	0	0	0	0	0	0	0	0	0	0	0	940000	700000	0	0	0	0
1020605009	0	0	0	0	0	0	0	0	0	0	0	0	0	0	0	0	0	0	0	0	0	0	0	0	0	0	0	0	0	0	0	0	0	0	0	0	0	0	0	0	0	0	0	650000	630000	0	0	0	0
1021209327	0	0	0	0	0	0	0	0	0	0	0	0	0	0	0	0	0	0	0	0	0	0	0	0	0	0	0	0	0	0	0	0	0	0	0	0	0	0	0	0	10000	0	0	860000	280000	0	0	0	0
1021420667	0	0	0	0	0	0	0	0	0	0	0	0	0	0	0	0	0	0	0	0	0	0	0	0	0	0	0	0	0	0	0	0	90000	0	0	0	0	0	0	0	0	0	0	1020000	880000	0	0	0	0
1021647886	0	0	0	0	0	0	0	0	0	0	0	0	0	0	0	0	0	0	0	0	0	0	0	0	0	0	0	0	0	0	0	0	0	0	0	0	0	0	0	0	0	0	0	120000	50000	0	0	0	0
1021756830	0	0	0	0	0	0	0	0	0	0	0	0	0	0	0	0	0	0	0	0	0	0	0	0	0	0	0	0	0	0	0	0	0	0	0	0	0	0	0	0	0	0	0	960000	500000	0	0	0	0
1021455217	0	0	0	0	0	0	0	0	0	0	0	0	0	0	0	0	0	0	0	0	0	0	0	0	0	0	0	0	0	0	0	0	0	0	0	0	0	0	0	0	0	0	0	1030000	10000	0	0	0	0
4637330	0	0	0	0	0	0	0	0	0	0	0	0	0	0	0	0	0	0	0	0	0	0	0	0	0	0	0	0	0	0	0	0	0	0	0	0	0	0	0	0	0	0	0	0	10000	0	0	0	0
8599124	0	0	0	0	0	0	0	0	0	0	0	0	0	0	0	0	0	0	0	0	0	0	0	0	0	0	0	0	0	0	180000	0	0	110000	0	0	0	0	0	0	0	0	0	0	0	0	0	0	0
1021847951	0	0	0	0	0	0	0	0	0	0	0	0	0	0	0	0	0	0	0	0	0	0	0	0	0	0	0	0	0	0	0	0	0	0	310000	1290000	0	0	0	0	0	0	0	0	0	0	0	0	0
12963231	0	0	0	0	0	0	0	0	0	0	0	0	0	0	0	0	0	0	0	0	0	0	0	0	0	0	0	0	0	0	0	0	0	0	0	40000
9804621	0	0	0	0	0	0	0	0	0	0	0	0	0	0	0	0	0	0	0	0	0	0	0	0	0	0	0	0	0	0	0	0	0	0	0	70000
3782271	0	0	0	0	0	0	0	0	0	0	0	0	0	0	0	0	0	0	0	0	0	0	0	0	0	0	0	0	0	0	0	0	0	0	0	0	0	40000
1018640771	0	0	0	0	0	0	0	0	0	0	0	0	0	0	0	0	0	0	0	0	0	0	0	0	0	0	0	0	0	0	0	0	0	0	0	0	0	20000
1019942646	0	0	0	0	0	0	0	0	0	0	0	0	0	0	0	0	0	0	0	0	0	0	0	0	0	0	0	0	0	0	0	0	0	0	0	0	0	0	0	0	0	20000
1018325788	0	0	0	0	0	0	0	0	0	0	0	0	0	0	0	0	0	0	0	0	0	0	0	0	0	0	0	0	0	0	0	0	0	0	0	0	0	0	0	0	0	20000	0	0	0	0	0	0	0
12080726	0	0	0	0	0	0	0	0	0	0	0	0	0	0	0	0	0	0	0	0	0	0	0	0	0	0	0	0	0	0	0	0	0	0	0	0	0	0	0	0	0	20000
1015655985	0	0	0	0	0	0	0	0	0	0	0	0	0	0	0	0	0	0	0	0	0	0	0	0	0	0	0	0	0	0	0	0	0	0	0	0	0	0	0	0	0	510000	0	0	0	0	0	0	0
1021336234	0	0	0	0	0	0	0	0	0	0	0	0	0	0	0	0	0	0	0	0	0	0	0	0	0	0	0	0	0	0	0	0	0	0	0	0	0	0	0	0	0	20000
9450933	0	0	0	0	0	0	0	0	0	0	0	0	0	0	0	0	0	0	0	0	0	0	0	0	0	0	0	0	0	0	0	0	0	0	0	0	0	0	0	0	0	10000	0	0	0	0	0	0	0
1020227377	0	0	0	0	0	0	0	0	0	0	0	0	0	0	0	0	0	0	0	0	0	0	0	0	0	0	0	0	0	0	0	0	0	0	0	0	0	0	0	0	0	0	0	60000	0	0	0	0	0
1020932969	0	0	0	0	0	0	0	0	0	0	0	0	0	0	0	0	0	0	0	0	0	0	0	0	0	0	0	0	0	0	0	0	0	0	0	0	0	0	0	0	0	0	0	170000	0	0	0	0	0
1021629187	0	0	0	0	0	0	0	0	0	0	0	0	0	0	0	0	0	0	0	0	0	0	0	0	0	0	0	0	0	0	0	0	0	0	0	0	0	0	0	0	0	0	0	20000	0	0	0	0	0
2677500	0	0	0	0	0	0	0	0	0	0	0	0	0	0	0	0	0	0	0	0	0	0	0	0	0	0	0	0	0	0	0	0	0	0	0	0	0	0	0	0	0	0	0	50000	0	0	0	0	0
1018796680	0	0	0	0	0	0	0	0	0	0	0	0	0	0	0	0	0	0	0	0	0	0	0	0	0	0	0	0	0	0	0	0	0	0	0	0	0	0	0	0	0	0	0	410000	0	0	0	0	0
1021641335	0	0	0	0	0	0	0	0	0	0	0	0	0	0	0	0	0	0	0	0	0	0	0	0	0	0	0	0	0	0	0	0	0	0	0	0	0	0	0	0	0	0	0	430000	0	0	0	0	0
1019944624	0	0	0	0	0	0	0	0	0	0	0	0	0	0	0	0	0	0	0	0	0	0	0	0	0	0	0	0	0	0	0	0	0	0	0	0	0	0	0	0	0	0	0	10000	0	0	0	0	0
1020881662	0	0	0	0	0	0	0	0	0	0	0	0	0	0	0	0	0	0	0	0	0	0	0	0	0	0	0	0	0	0	0	0	0	0	0	0	0	0	0	0	0	0	0	130000	0	0	0	0	0
1021322649	0	0	0	0	0	0	0	0	0	0	0	0	0	0	0	0	0	0	0	0	0	0	0	0	0	0	0	0	0	0	0	0	0	0	0	0	0	0	0	0	0	0	0	200000	0	0	0	0	0
1021688523	0	0	0	0	0	0	0	0	0	0	0	0	0	0	0	0	0	0	0	0	0	0	0	0	0	0	0	0	0	0	0	0	0	0	0	0	0	0	0	0	0	0	0	10000	0	0	0	0	0
1021953560	0	0	0	0	0	0	0	0	0	0	0	0	0	0	0	0	0	0	0	0	0	0	0	0	0	0	0	0	0	0	0	0	0	0	0	0	0	0	0	0	0	0	0	640000	0	0	0	0	0
1021054622	0	0	0	0	0	0	0	0	0	0	0	0	0	0	0	0	0	0	0	0	0	0	0	0	0	0	0	0	0	0	0	0	0	0	0	0	0	0	0	0	0	0	0	960000	0	0	0	0	0
8160681	0	0	0	0	0	0	0	0	0	0	0	0	0	0	0	0	0	0	0	0	0	0	0	0	0	0	0	0	0	0	0	0	0	0	0	0	0	0	0	0	0	0	0	470000	0	0	0	0	0
1020417022	0	0	0	0	0	0	0	0	0	0	0	0	0	0	0	0	0	0	0	0	0	0	0	0	0	0	0	0	0	0	0	0	0	0	0	0	0	0	0	0	0	0	0	20000
1020731553	0	0	0	0	0	0	0	0	0	0	0	0	0	0	0	0	0	0	0	0	0	0	0	0	0	0	0	0	0	0	0	0	0	0	0	0	0	0	0	0	0	0	0	50000	0	0	0	0	0
1021455078	0	0	0	0	0	0	0	0	0	0	0	0	0	0	0	0	0	0	0	0	0	0	0	0	0	0	0	0	0	0	0	0	0	0	0	0	0	0	0	0	0	0	0	170000	0	0	0	0	0
1021613096	0	0	0	0	0	0	0	0	0	0	0	0	0	0	0	0	0	0	0	0	0	0	0	0	0	0	0	0	0	0	0	0	0	0	0	0	0	0	0	0	0	0	0	10000	0	0	0	0	0
8109030	0	0	0	0	0	0	0	0	0	0	0	0	0	0	0	0	0	0	0	0	0	0	0	0	0	0	0	0	0	0	0	0	0	0	0	0	0	0	0	0	0	0	0	80000	0	0	0	0	0
1019573796	0	0	0	0	0	0	0	0	0	0	0	0	0	0	0	0	0	0	0	0	0	0	0	0	0	0	0	0	0	0	0	0	0	0	0	0	0	0	0	0	0	0	0	50000	0	0	0	0	0
1020415717	0	0	0	0	0	0	0	0	0	0	0	0	0	0	0	0	0	0	0	0	0	0	0	0	0	0	0	0	0	0	0	0	0	0	0	0	0	0	0	0	0	0	0	20000
1021259365	0	0	0	0	0	0	0	0	0	0	0	0	0	0	0	0	0	0	0	0	0	0	0	0	0	0	0	0	0	0	0	0	0	0	0	0	0	0	0	0	0	0	0	30000	0	0	0	0	0
1021781455	0	0	0	0	0	0	0	0	0	0	0	0	0	0	0	0	0	0	0	0	0	0	0	0	0	0	0	0	0	0	0	0	0	0	0	0	0	0	0	0	0	0	0	30000	0	0	0	0	0
1014530739	0	0	0	0	0	0	0	0	0	0	0	0	0	0	0	0	0	0	0	0	0	0	0	0	0	0	0	0	0	0	0	0	0	0	0	0	0	0	0	0	0	0	0	0	0	0	0	0	0
1020048222	0	0	0	0	0	0	0	0	0	0	0	0	0	0	0	0	0	0	0	0	0	0	0	0	0	0	0	0	0	0	0	0	0	0	0	0	0	0	0	0	0	0	0	0	0	0	0	0	0
1021890537	0	0	0	0	0	0	0	0	0	0	0	0	0	0	0	0	0	0	0	0	0	0	200000
7774432	0	0	0	0	0	0	0	0	0	0	0	0	0	0	0	0	0	0	0	0	0	0	10000	0	0	0	0	0	0	0	0	0	0	0	0	0	0	0	0	0	0	0	0	0	0	0	0	0	0
1018420944	0	0	0	0	0	0	0	0	0	0	0	0	0	0	0	0	0	0	0	0	0	0	0	0	0	0	0	0	0	90000
1014721827	0	0	0	0	0	0	0	0	0	0	0	0	0	0	0	0	0	0	0	0	0	0	0	0	0	0	0	0	0	0	0	0	30000
1021251735	0	0	0	0	0	0	0	0	0	0	0	0	0	0	0	0	0	0	0	0	0	0	0	0	0	0	0	0	0	0	0	0	10000
1020398973	0	0	0	0	0	0	0	0	0	0	0	0	0	0	0	0	0	0	0	0	0	0	0	0	0	0	0	0	0	0	0	0	20000
1021423890	0	0	0	0	0	0	0	0	0	0	0	0	0	0	0	0	0	0	0	0	0	0	0	0	0	0	0	0	0	0	0	0	10000	0	0	0	0	0	0	0	0	0	0	0	0	0	0	0	0
1020715804	0	0	0	0	0	0	0	0	0	0	0	0	0	0	0	0	0	0	0	0	0	0	0	0	0	0	0	0	0	0	0	0	10000
1018745557	0	0	0	0	0	0	0	0	0	0	0	0	0	0	0	0	0	0	0	0	0	0	0	0	0	0	0	0	0	0	0	0	30000
1019522630	0	0	0	0	0	0	0	0	0	0	0	0	0	0	0	0	0	0	0	0	0	0	0	0	0	0	0	0	0	0	0	0	30000
1019918075	0	0	0	0	0	0	0	0	0	0	0	0	0	0	0	0	0	0	0	0	0	0	0	0	0	0	0	0	0	0	0	0	30000
1020745228	0	0	0	0	0	0	0	0	0	0	0	0	0	0	0	0	0	0	0	0	0	0	0	0	0	0	0	0	0	0	0	0	40000	0	20000
1016475089	0	0	0	0	0	0	0	0	0	0	0	0	0	0	0	0	0	0	0	0	0	0	0	0	0	0	0	0	0	0	0	0	270000
10784271	0	0	0	0	0	0	0	0	0	0	0	0	0	0	0	0	0	0	0	0	0	0	0	0	0	0	0	0	0	0	0	0	0	0	20000
1020121113	0	0	0	0	0	0	0	0	0	0	0	0	0	0	0	0	0	0	0	0	0	0	0	0	0	0	0	0	0	0	0	0	0	0	0	0	0	0	0	0	20000
1021757920	0	0	0	0	0	0	0	0	0	0	0	0	0	0	0	0	0	0	0	0	0	0	0	0	0	0	0	0	0	0	0	0	0	0	0	0	0	0	0	0	660000
11894570	0	0	0	0	0	0	0	0	0	0	0	0	0	0	0	0	0	0	0	0	0	0	0	0	0	0	0	0	0	0	0	0	0	0	0	0	0	0	0	0	270000	0	0	0	0	0	0	0	0
1020256987	0	0	0	0	0	0	0	0	0	0	0	0	0	0	0	0	0	0	0	0	0	0	0	0	0	0	0	0	0	0	0	0	0	0	0	0	0	0	0	0	160000
1020257694	0	0	0	0	0	0	0	0	0	0	0	0	0	0	0	0	0	0	0	0	0	0	0	0	0	0	0	0	0	0	0	0	0	0	0	0	0	0	0	0	0	0	0	0	0	0	10000
1019446206	0	0	0	0	0	0	0	0	0	0	0	0	0	0	0	0	0	0	0	0	0	0	0	0	0	0	0	0	0	0	0	0	0	0	0	0	0	0	0	0	0	0	0	0	0	0	0	0	0
1021716897	0	0	0	0	0	0	0	0	0	0	0	0	0	0	0	0	0	0	0	0	0	0	0	0	0	0	0	0	0	0	0	0	0	0	0	0	0	0	0	0	0	0	0	0	0	0	0	0	0
1020152855	0	0	0	0	0	0	0	0	0	0	0	0	0	0	0	0	0	0	0	0	0	0	0	0	0	0	0	0	0	0	0	0	0	0	0	0	0	0	0	0	0	0	0	0	0	0	0	0	0
1021446850	0	0	0	0	0	0	0	0	0	0	0	0	0	0	0	0	0	0	0	0	0	0	0	0	0	0	0	0	0	0	0	0	0	0	0	0	0	0	0	0	0	0	0	0	0	0	0	0	0
1019440662	0	0	0	0	0	0	0	0	0	0	0	0	0	0	0	0	0	0	0	0	0	0	0	0	0	0	0	0	0	0	0	0	0	0	0	0	0	0	0	0	0	0	0	0	0	0	0	0	0
1019732426	0	0	0	0	0	0	0	0	0	0	0	0	0	0	0	0	0	0	0	0	0	0	0	0	0	0	0	0	0	0	0	0	0	0	0	0	0	0	0	0	0	0	0	0	0	0	0	0	0
1021437377	0	0	0	0	0	0	0	0	0	0	0	0	0	0	0	0	0	0	0	0	0	0	0	0	0	0	0	0	0	0	0	0	0	0	0	0	0	0	0	0	0	0	0	0	0	0	0	0	0
1019570513	0	0	0	0	0	0	0	0	0	0	0	0	0	0	0	0	0	0	0	0	0	0	0	0	0	0	0	0	0	0	0	0	0	0	0	0	0	0	0	0	0	0	0	0	0	0	0	0	0
1019701298	0	0	0	0	0	0	0	0	0	0	0	0	0	0	0	0	0	0	0	0	0	0	0	0	0	0	0	0	0	0	0	0	0	0	0	0	0	0	0	0	0	0	0	0	0	0	0	0	0
1019933648	0	0	0	0	0	0	0	0	0	0	0	0	0	0	0	0	0	0	0	0	0	0	0	0	0	0	0	0	0	0	0	0	0	0	0	0	0	0	0	0	0	0	0	0	0	0	0	0	0
1020019803	0	0	0	0	0	0	0	0	0	0	0	0	0	0	0	0	0	0	0	0	0	0	0	0	0	0	0	0	0	0	0	0	0	0	0	0	0	0	0	0	0	0	0	0	0	0	0	0	0
1020269682	0	0	0	0	0	0	0	0	0	0	0	0	0	0	0	0	0	0	0	0	0	0	0	0	0	0	0	0	0	0	0	0	0	0	0	0	0	0	0	0	0	0	0	0	0	0	0	0	0
1020770641	0	0	0	0	0	0	0	0	0	0	0	0	0	0	0	0	0	0	0	0	0	0	0	0	0	0	0	0	0	0	0	0	0	0	0	0	0	0	0	0	0	0	0	0	0	0	0	0	0
1021046345	0	0	0	0	0	0	0	0	0	0	0	0	0	0	0	0	0	0	0	0	0	0	0	0	0	0	0	0	0	0	0	0	0	0	0	0	0	0	0	0	0	0	0	0	0	0	0	0	0
1021194369	0	0	0	0	0	0	0	0	0	0	0	0	0	0	0	0	0	0	0	0	0	0	0	0	0	0	0	0	0	0	0	0	0	0	0	0	0	0	0	0	0	0	0	0	0	0	0	0	0
1021220109	0	0	0	0	0	0	0	0	0	0	0	0	0	0	0	0	0	0	0	0	0	0	0	0	0	0	0	0	0	0	0	0	0	0	0	0	0	0	0	0	0	0	0	0	0	0	0	0	0
1015139355	0	0	0	0	0	0	0	0	0	0	0	0	0	0	0	0	0	0	0	0	0	0	0	0	0	0	0	0	0	0	0	0	0	0	0	0	0	0	0	0	0	0	0	0	0	0	0	0	0
1015986564	0	0	0	0	0	0	0	0	0	0	0	0	0	0	0	0	0	0	0	0	0	0	0	0	0	0	0	0	0	0	0	0	0	0	0	0	0	0	0	0	0	0	0	0	0	0	0	0	0
1019634766	0	0	0	0	0	0	0	0	0	0	0	0	0	0	0	0	0	0	0	0	0	0	0	0	0	0	0	0	0	0	0	0	0	0	0	0	0	0	0	0	0	0	0	0	0	0	0	0	0
1019762388	0	0	0	0	0	0	0	0	0	0	0	0	0	0	0	0	0	0	0	0	0	0	0	0	0	0	0	0	0	0	0	0	0	0	0	0	0	0	0	0	0	0	0	0	0	0	0	0	0
1020535188	0	0	0	0	0	0	0	0	0	0	0	0	0	0	0	0	0	0	0	0	0	0	0	0	0	0	0	0	0	0	0	0	0	0	0	0	0	0	0	0	0	0	0	0	0	0	0	0	0
1021688906	0	0	0	0	0	0	0	0	0	0	0	0	0	0	0	0	0	0	0	0	0	0	0	0	0	0	0	0	0	0	0	0	0	0	0	0	0	0	0	0	0	0	0	0	0	0	0	0	0
2501517	0	0	0	0	0	0	0	0	0	0	0	0	0	0	0	0	0	0	0	0	0	0	0	0	0	0	0	0	0	0	0	0	0	0	0	0	0	0	0	0	0	0	0	0	0	0	0	0	0
4610316	0	0	0	0	0	0	0	0	0	0	0	0	0	0	0	0	0	0	0	0	0	0	0	0	0	0	0	0	0	0	0	0	0	0	0	0	0	0	0	0	0	0	0	0	0	0	0	0	0
9389967	0	0	0	0	0	0	0	0	0	0	0	0	0	0	0	0	0	0	0	0	0	0	0	0	0	0	0	0	0	0	0	0	0	0	0	0	0	0	0	0	0	0	0	0	0	0	0	0	0
1015168820	0	0	0	0	0	0	0	0	0	0	0	0	0	0	0	0	0	0	0	0	0	0	0	0	0	0	0	0	0	0	0	0	0	0	0	0	0	0	0	0	0	0	0	0	0	0	0	0	0
1019456510	0	0	0	0	0	0	0	0	0	0	0	0	0	0	0	0	0	0	0	0	0	0	0	0	0	0	0	0	0	0	0	0	0	0	0	0	0	0	0	0	0	0	0	0	0	0	0	0	0
1019567742	0	0	0	0	0	0	0	0	0	0	0	0	0	0	0	0	0	0	0	0	0	0	0	0	0	0	0	0	0	0	0	0	0	0	0	0	0	0	0	0	0	0	0	0	0	0	0	0	0
1019846768	0	0	0	0	0	0	0	0	0	0	0	0	0	0	0	0	0	0	0	0	0	0	0	0	0	0	0	0	0	0	0	0	0	0	0	0	0	0	0	0	0	0	0	0	0	0	0	0	0
1020362253	0	0	0	0	0	0	0	0	0	0	0	0	0	0	0	0	0	0	0	0	0	0	0	0	0	0	0	0	0	0	0	0	0	0	0	0	0	0	0	0	0	0	0	0	0	0	0	0	0
1021631370	0	0	0	0	0	0	0	0	0	0	0	0	0	0	0	0	0	0	0	0	0	0	0	0	0	0	0	0	0	0	0	0	0	0	0	0	0	0	0	0	0	0	0	0	0	0	0	0	0
11235659	0	0	0	0	0	0	0	0	0	0	0	0	0	0	0	0	0	0	0	0	0	0	0	0	0	0	0	0	0	0	0	0	0	0	0	0	0	0	0	0	0	0	0	0	0	0	0	0	0
11355045	0	0	0	0	0	0	0	0	0	0	0	0	0	0	0	0	0	0	0	0	0	0	0	0	0	0	0	0	0	0	0	0	0	0	0	0	0	0	0	0	0	0	0	0	0	0	0	0	0
2067236	0	0	0	0	0	0	0	0	0	0	0	0	0	0	0	0	0	0	0	0	0	0	0	0	0	0	0	0	0	0	0	0	0	0	0	0	0	0	0	0	0	0	0	0	0	0	0	0	0
1019589532	0	0	0	0	0	0	0	0	0	0	0	0	0	0	0	0	0	0	0	0	0	0	0	0	0	0	0	0	0	0	0	0	0	0	0	0	0	0	0	0	0	0	0	0	0	0	0	0	0
1021646722	0	0	0	0	0	0	0	0	0	0	0	0	0	0	0	0	0	0	0	0	0	0	0	0	0	0	0	0	0	0	0	0	0	0	0	0	0	0	0	0	0	0	0	0	0	0	0	0	0
1022248859	0	0	0	0	0	0	0	0	0	0	0	0	0	0	0	0	0	0	0	0	0	0	0	0	0	0	0	0	0	0	0	0	0	0	0	0	0	0	0	0	0	0	0	0	0	0	0	0	0
3837608	0	0	0	0	0	0	0	0	0	0	0	0	0	0	0	0	0	0	0	0	0	0	0	0	0	0	0	0	0	0	0	0	0	0	0	0	0	0	0	0	0	0	0	0	0	0	0	0	0
1014747411	0	0	0	0	0	0	0	0	0	0	0	0	0	0	0	0	0	0	0	0	0	0	0	0	0	0	0	0	0	0	0	0	0	0	0	0	0	0	0	0	0	0	0	0	0	0	0	0	0
1014988630	0	0	0	0	0	0	0	0	0	0	0	0	0	0	0	0	0	0	0	0	0	0	0	0	0	0	0	0	0	0	0	0	0	0	0	0	0	0	0	0	0	0	0	0	0	0	0	0	0
1019545630	0	0	0	0	0	0	0	0	0	0	0	0	0	0	0	0	0	0	0	0	0	0	0	0	0	0	0	0	0	0	0	0	0	0	0	0	0	0	0	0	0	0	0	0	0	0	0	0	0
1020501739	0	0	0	0	0	0	0	0	0	0	0	0	0	0	0	0	0	0	0	0	0	0	0	0	0	0	0	0	0	0	0	0	0	0	0	0	0	0	0	0	0	0	0	0	0	0	0	0	0
1020946024	0	0	0	0	0	0	0	0	0	0	0	0	0	0	0	0	0	0	0	0	0	0	0	0	0	0	0	0	0	0	0	0	0	0	0	0	0	0	0	0	0	0	0	0	0	0	0	0	0
1021782700	0	0	0	0	0	0	0	0	0	0	0	0	0	0	0	0	0	0	0	0	0	0	0	0	0	0	0	0	0	0	0	0	0	0	0	0	0	0	0	0	0	0	0	0	0	0	0	0	0
10993275	0	0	0	0	0	0	0	0	0	0	0	0	0	0	0	0	0	0	0	0	0	0	0	0	0	0	0	0	0	0	0	0	0	0	0	0	0	0	0	0	0	0	0	0	0	0	0	0	0
2034014	0	0	0	0	0	0	0	0	0	0	0	0	0	0	0	0	0	0	0	0	0	0	0	0	0	0	0	0	0	0	0	0	0	0	0	0	0	0	0	0	0	0	0	0	0	0	0	0	0
1019635705	0	0	0	0	0	0	0	0	0	0	0	0	0	0	0	0	0	0	0	0	0	0	0	0	0	0	0	0	0	0	0	0	0	0	0	0	0	0	0	0	0	0	0	0	0	0	0	0	0
1019807883	0	0	0	0	0	0	0	0	0	0	0	0	0	0	0	0	0	0	0	0	0	0	0	0	0	0	0	0	0	0	0	0	0	0	0	0	0	0	0	0	0	0	0	0	0	0	0	0	0
1020347947	0	0	0	0	0	0	0	0	0	0	0	0	0	0	0	0	0	0	0	0	0	0	0	0	0	0	0	0	0	0	0	0	0	0	0	0	0	0	0	0	0	0	0	0	0	0	0	0	0
1021726547	0	0	0	0	0	0	0	0	0	0	0	0	0	0	0	0	0	0	0	0	0	0	0	0	0	0	0	0	0	0	0	0	0	0	0	0	0	0	0	0	0	0	0	0	0	0	0	0	0
6213331	0	0	0	0	0	0	0	0	0	0	0	0	0	0	0	0	0	0	0	0	0	0	0	0	0	0	0	0	0	0	0	0	0	0	0	0	0	0	0	0	0	0	0	0	0	0	0	0	0
1019146949	0	0	0	0	0	0	0	0	0	0	0	0	0	0	0	0	0	0	0	0	0	0	0	0	0	0	0	0	0	0	0	0	0	0	0	0	0	0	0	0	0	0	0	0	0	0	0	0	0
1019693171	0	0	0	0	0	0	0	0	0	0	0	0	0	0	0	0	0	0	0	0	0	0	0	0	0	0	0	0	0	0	0	0	0	0	0	0	0	0	0	0	0	0	0	0	0	0	0	0	0
1019887596	0	0	0	0	0	0	0	0	0	0	0	0	0	0	0	0	0	0	0	0	0	0	0	0	0	0	0	0	0	0	0	0	0	0	0	0	0	0	0	0	0	0	0	0	0	0	0	0	0
1019951569	0	0	0	0	0	0	0	0	0	0	0	0	0	0	0	0	0	0	0	0	0	0	0	0	0	0	0	0	0	0	0	0	0	0	0	0	0	0	0	0	0	0	0	0	0	0	0	0	0
1909124	0	0	0	0	0	0	0	0	0	0	0	0	0	0	0	0	0	0	0	0	0	0	0	0	0	0	0	0	0	0	0	0	0	0	0	0	0	0	0	0	0	0	0	0	0	0	0	0	0
5418220	0	0	0	0	0	0	0	0	0	0	0	0	0	0	0	0	0	0	0	0	0	0	0	0	0	0	0	0	0	0	0	0	0	0	0	0	0	0	0	0	0	0	0	0	0	0	0	0	0
1019403485	0	0	0	0	0	0	0	0	0	0	0	0	0	0	0	0	0	0	0	0	0	0	0	0	0	0	0	0	0	0	0	0	0	0	0	0	0	0	0	0	0	0	0	0	0	0	0	0	0
1019508098	0	0	0	0	0	0	0	0	0	0	0	0	0	0	0	0	0	0	0	0	0	0	0	0	0	0	0	0	0	0	0	0	0	0	0	0	0	0	0	0	0	0	0	0	0	0	0	0	0
1019878391	0	0	0	0	0	0	0	0	0	0	0	0	0	0	0	0	0	0	0	0	0	0	0	0	0	0	0	0	0	0	0	0	0	0	0	0	0	0	0	0	0	0	0	0	0	0	0	0	0
1020001203	0	0	0	0	0	0	0	0	0	0	0	0	0	0	0	0	0	0	0	0	0	0	0	0	0	0	0	0	0	0	0	0	0	0	0	0	0	0	0	0	0	0	0	0	0	0	0	0	0
1020251758	0	0	0	0	0	0	0	0	0	0	0	0	0	0	0	0	0	0	0	0	0	0	0	0	0	0	0	0	0	0	0	0	0	0	0	0	0	0	0	0	0	0	0	0	0	0	0	0	0
1019539059	0	0	0	0	0	0	0	0	0	0	0	0	0	0	0	0	0	0	0	0	0	0	0	0	0	0	0	0	0	0	0	0	0	0	0	0	0	0	0	0	0	0	0	0	0	0	0	0	0
1019953217	0	0	0	0	0	0	0	0	0	0	0	0	0	0	0	0	0	0	0	0	0	0	0	0	0	0	0	0	0	0	0	0	0	0	0	0	0	0	0	0	0	0	0	0	0	0	0	0	0
1018417553	0	0	0	0	0	0	0	0	0	0	0	0	0	0	0	0	0	0	0	0	0	0	0	0	0	0	0	0	0	0	0	0	0	0	0	0	0	0	0	0	0	0	0	0	0	0	0	0	0
1022155881	0	0	0	0	0	0	0	0	0	0	0	0	0	0	0	0	0	0	0	0	0	0	0	0	0	0	0	0	0	0	0	0	0	0	0	0	0	0	0	0	0	0	0	0	0	0	0	0	0
5167730	0	0	0	0	0	0	0	0	0	0	0	0	0	0	0	0	0	0	0	0	0	0	0	0	0	0	0	0	0	0	0	0	0	0	0	0	0	0	0	0	0	0	0	0	0	0	0	0	0
1019423213	0	0	0	0	0	0	0	0	0	0	0	0	0	0	0	0	0	0	0	0	0	0	0	0	0	0	0	0	0	0	0	0	0	0	0	0	0	0	0	0	0	0	0	0	0	0	0	0	0
1019772166	0	0	0	0	0	0	0	0	0	0	0	0	0	0	0	0	0	0	0	0	0	0	0	0	0	0	0	0	0	0	0	0	0	0	0	0	0	0	0	0	0	0	0	0	0	0	0	0	0
1019456443	0	0	0	0	0	0	0	0	0	0	0	0	0	0	0	0	0	0	0	0	0	0	0	0	0	0	0	0	0	0	0	0	0	0	0	0	0	0	0	0	0	0	0	0	0	0	0	0	0
1021704882	0	0	0	0	0	0	0	0	0	0	0	0	0	0	0	0	0	0	0	0	0	0	0	0	0	0	0	0	0	0	0	0	0	0	0	0	0	0	0	0	0	0	0	0	0	0	0	0	0
1016520748	0	0	0	0	0	0	0	0	0	0	0	0	0	0	0	0	0	0	0	0	0	0	0	0	0	0	0	0	0	0	0	0	0	0	0	0	0	0	0	0	0	0	0	0	0	0	0	0	0
1021096894	0	0	0	0	0	0	0	0	0	0	0	0	0	0	0	0	0	0	0	0	0	0	0	0	0	0	0	0	0	0	0	0	0	0	0	0	0	0	0	0	0	0	0	0	0	0	0	0	0
1018883099	0	0	0	0	0	0	0	0	0	0	0	0	0	0	0	0	0	0	0	0	0	0	0	0	0	0	0	0	0	0	0	0	0	0	0	0	0	0	0	0	0	0	0	0	0	0	0	0	0
12094272	0	0	0	0	0	0	0	0	0	0	0	0	0	0	0	0	0	0	0	0	0	0	0	0	0	0	0	0	0	0	0	0	0	0	0	0	0	0	0	0	0	0	0	0	0	0	0	0	0
1494496	0	0	0	0	0	0	0	0	0	0	0	0	0	0	0	0	0	0	0	0	0	0	0	0	0	0	0	0	0	0	0	0	0	0	0	0	0	0	0	0	0	0	0	0	0	0	0	0	0
3115455	0	0	0	0	0	0	0	0	0	0	0	0	0	0	0	0	0	0	0	0	0	0	0	0	0	0	0	0	0	0	0	0	0	0	0	0	0	0	0	0	0	0	0	0	0	0	0	0	0
1019523132	0	0	0	0	0	0	0	0	0	0	0	0	0	0	0	0	0	0	0	0	0	0	0	0	0	0	0	0	0	0	0	0	0	0	0	0	0	0	0	0	0	0	0	0	0	0	0	0	0
1019635845	0	0	0	0	0	0	0	0	0	0	0	0	0	0	0	0	0	0	0	0	0	0	0	0	0	0	0	0	0	0	0	0	0	0	0	0	0	0	0	0	0	0	0	0	0	0	0	0	0
1019896754	0	0	0	0	0	0	0	0	0	0	0	0	0	0	0	0	0	0	0	0	0	0	0	0	0	0	0	0	0	0	0	0	0	0	0	0	0	0	0	0	0	0	0	0	0	0	0	0	0
1021903996	0	0	0	0	0	0	0	0	0	0	0	0	0	0	0	0	0	0	0	0	0	0	0	0	0	0	0	0	0	0	0	0	0	0	0	0	0	0	0	0	0	0	0	0	0	0	0	0	0
1022134861	0	0	0	0	0	0	0	0	0	0	0	0	0	0	0	0	0	0	0	0	0	0	0	0	0	0	0	0	0	0	0	0	0	0	0	0	0	0	0	0	0	0	0	0	0	0	0	0	0
1636369	0	0	0	0	0	0	0	0	0	0	0	0	0	0	0	0	0	0	0	0	0	0	0	0	0	0	0	0	0	0	0	0	0	0	0	0	0	0	0	0	0	0	0	0	0	0	0	0	0
1019691073	0	0	0	0	0	0	0	0	0	0	0	0	0	0	0	0	0	0	0	0	0	0	0	0	0	0	0	0	0	0	0	0	0	0	0	0	0	0	0	0	0	0	0	0	0	0	0	0	0
2049701	0	0	0	0	0	0	0	0	0	0	0	0	0	0	0	0	0	0	0	0	0	0	0	0	0	0	0	0	0	0	0	0	0	0	0	0	0	0	0	0	0	0	0	0	0	0	0	0	0
1019733271	0	0	0	0	0	0	0	0	0	0	0	0	0	0	0	0	0	0	0	0	0	0	0	0	0	0	0	0	0	0	0	0	0	0	0	0	0	0	0	0	0	0	0	0	0	0	0	0	0
1019910511	0	0	0	0	0	0	0	0	0	0	0	0	0	0	0	0	0	0	0	0	0	0	0	0	0	0	0	0	0	0	0	0	0	0	0	0	0	0	0	0	0	0	0	0	0	0	0	0	0
1019319362	0	0	0	0	0	0	0	0	0	0	0	0	0	0	0	0	0	0	0	0	0	0	0	0	0	0	0	0	0	0	0	0	0	0	0	0	0	0	0	0	0	0	0	0	0	0	0	0	0
1019514903	0	0	0	0	0	0	0	0	0	0	0	0	0	0	0	0	0	0	0	0	0	0	0	0	0	0	0	0	0	0	0	0	0	0	0	0	0	0	0	0	0	0	0	0	0	0	0	0	0
1019992130	0	0	0	0	0	0	0	0	0	0	0	0	0	0	0	0	0	0	0	0	0	0	0	0	0	0	0	0	0	0	0	0	0	0	0	0	0	0	0	0	0	0	0	0	0	0	0	0	0
1020392538	0	0	0	0	0	0	0	0	0	0	0	0	0	0	0	0	0	0	0	0	0	0	0	0	0	0	0	0	0	0	0	0	0	0	0	0	0	0	0	0	0	0	0	0	0	0	0	0	0
1015438374	0	0	0	0	0	0	0	0	0	0	0	0	0	0	0	0	0	0	0	0	0	0	0	0	0	0	0	0	0	0	0	0	0	0	0	0	0	0	0	0	0	0	0	0	0	0	0	0	0
1019739275	0	0	0	0	0	0	0	0	0	0	0	0	0	0	0	0	0	0	0	0	0	0	0	0	0	0	0	0	0	0	0	0	0	0	0	0	0	0	0	0	0	0	0	0	0	0	0	0	0
1019950076	0	0	0	0	0	0	0	0	0	0	0	0	0	0	0	0	0	0	0	0	0	0	0	0	0	0	0	0	0	0	0	0	0	0	0	0	0	0	0	0	0	0	0	0	0	0	0	0	0
1020898895	0	0	0	0	0	0	0	0	0	0	0	0	0	0	0	0	0	0	0	0	0	0	0	0	0	0	0	0	0	0	0	0	0	0	0	0	0	0	0	0	0	0	0	0	0	0	0	0	0
1016707750	0	0	0	0	0	0	0	0	0	0	0	0	0	0	0	0	0	0	0	0	0	0	0	0	0	0	0	0	0	0	0	0	0	0	0	0	0	0	0	0	0	0	0	0	0	0	0	0	0
1019431862	0	0	0	0	0	0	0	0	0	0	0	0	0	0	0	0	0	0	0	0	0	0	0	0	0	0	0	0	0	0	0	0	0	0	0	0	0	0	0	0	0	0	0	0	0	0	0	0	0
1019449094	0	0	0	0	0	0	0	0	0	0	0	0	0	0	0	0	0	0	0	0	0	0	0	0	0	0	0	0	0	0	0	0	0	0	0	0	0	0	0	0	0	0	0	0	0	0	0	0	0
1019492195	0	0	0	0	0	0	0	0	0	0	0	0	0	0	0	0	0	0	0	0	0	0	0	0	0	0	0	0	0	0	0	0	0	0	0	0	0	0	0	0	0	0	0	0	0	0	0	0	0
1019719807	0	0	0	0	0	0	0	0	0	0	0	0	0	0	0	0	0	0	0	0	0	0	0	0	0	0	0	0	0	0	0	0	0	0	0	0	0	0	0	0	0	0	0	0	0	0	0	0	0
1019883091	0	0	0	0	0	0	0	0	0	0	0	0	0	0	0	0	0	0	0	0	0	0	0	0	0	0	0	0	0	0	0	0	0	0	0	0	0	0	0	0	0	0	0	0	0	0	0	0	0
1019232151	0	0	0	0	0	0	0	0	0	0	0	0	0	0	0	0	0	0	0	0	0	0	0	0	0	0	0	0	0	0	0	0	0	0	0	0	0	0	0	0	0	0	0	0	0	0	0	0	0
1020392045	0	0	0	0	0	0	0	0	0	0	0	0	0	0	0	0	0	0	0	0	0	0	0	0	0	0	0	0	0	0	0	0	0	0	0	0	0	0	0	0	0	0	0	0	0	0	0	0	0
1019356575	0	0	0	0	0	0	0	0	0	0	0	0	0	0	0	0	0	0	0	0	0	0	0	0	0	0	0	0	0	0	0	0	0	0	0	0	0	0	0	0	0	0	0	0	0	0	0	0	0
1020622262	0	0	0	0	0	0	0	0	0	0	0	0	0	0	0	0	0	0	0	0	0	0	0	0	0	0	0	0	0	0	0	0	0	0	0	0	0	0	0	0	0	0	0	0	0	0	0	0	0
1047401	0	0	0	0	0	0	0	0	0	0	0	0	0	0	0	0	0	0	0	0	0	0	0	0	0	0	0	0	0	0	0	0	0	0	0	0	0	0	0	0	0	0	0	0	0	0	0	0	0
10768470	0	0	0	0	0	0	0	0	0	0	0	0	0	0	0	0	0	0	0	0	0	0	0	0	0	0	0	0	0	0	0	0	0	0	0	0	0	0	0	0	0	0	0	0	0	0	0	0	0
1019725982	0	0	0	0	0	0	0	0	0	0	0	0	0	0	0	0	0	0	0	0	0	0	0	0	0	0	0	0	0	0	0	0	0	0	0	0	0	0	0	0	0	0	0	0	0	0	0	0	0
1017143755	0	0	0	0	0	0	0	0	0	0	0	0	0	0	0	0	0	0	0	0	0	0	0	0	0	0	0	0	0	0	0	0	0	0	0	0	0	0	0	0	0	0	0	0	0	0	0	0	0
1020883783	0	0	0	0	0	0	0	0	0	0	0	0	0	0	0	0	0	0	0	0	0	0	0	0	0	0	0	0	0	0	0	0	0	0	0	0	0	0	0	0	0	0	0	0	0	0	0	0	0
1018936274	0	0	0	0	0	0	0	0	0	0	0	0	0	0	0	0	0	0	0	0	0	0	0	0	0	0	0	0	0	0	0	0	0	0	0	0	0	0	0	0	0	0	0	0	0	0	0	0	0
1019524782	0	0	0	0	0	0	0	0	0	0	0	0	0	0	0	0	0	0	0	0	0	0	0	0	0	0	0	0	0	0	0	0	0	0	0	0	0	0	0	0	0	0	0	0	0	0	0	0	0
1019766188	0	0	0	0	0	0	0	0	0	0	0	0	0	0	0	0	0	0	0	0	0	0	0	0	0	0	0	0	0	0	0	0	0	0	0	0	0	0	0	0	0	0	0	0	0	0	0	0	0
1019954596	0	0	0	0	0	0	0	0	0	0	0	0	0	0	0	0	0	0	0	0	0	0	0	0	0	0	0	0	0	0	0	0	0	0	0	0	0	0	0	0	0	0	0	0	0	0	0	0	0
1019954604	0	0	0	0	0	0	0	0	0	0	0	0	0	0	0	0	0	0	0	0	0	0	0	0	0	0	0	0	0	0	0	0	0	0	0	0	0	0	0	0	0	0	0	0	0	0	0	0	0
1014989220	0	0	0	0	0	0	0	0	0	0	0	0	0	0	0	0	0	0	0	0	0	0	0	0	0	0	0	0	0	0	0	0	0	0	0	0	0	0	0	0	0	0	0	0	0	0	0	0	0
1015510661	0	0	0	0	0	0	0	0	0	0	0	0	0	0	0	0	0	0	0	0	0	0	0	0	0	0	0	0	0	0	0	0	0	0	0	0	0	0	0	0	0	0	0	0	0	0	0	0	0
1019507706	0	0	0	0	0	0	0	0	0	0	0	0	0	0	0	0	0	0	0	0	0	0	0	0	0	0	0	0	0	0	0	0	0	0	0	0	0	0	0	0	0	0	0	0	0	0	0	0	0
6042220	0	0	0	0	0	0	0	0	0	0	0	0	0	0	0	0	0	0	0	0	0	0	0	0	0	0	0	0	0	0	0	0	0	0	0	0	0	0	0	0	0	0	0	0	0	0	0	0	0
6072151	0	0	0	0	0	0	0	0	0	0	0	0	0	0	0	0	0	0	0	0	0	0	0	0	0	0	0	0	0	0	0	0	0	0	0	0	0	0	0	0	0	0	0	0	0	0	0	0	0
1019733340	0	0	0	0	0	0	0	0	0	0	0	0	0	0	0	0	0	0	0	0	0	0	0	0	0	0	0	0	0	0	0	0	0	0	0	0	0	0	0	0	0	0	0	0	0	0	0	0	0
9416876	0	0	0	0	0	0	0	0	0	0	0	0	0	0	0	0	0	0	0	0	0	0	0	0	0	0	0	0	0	0	0	0	0	0	0	0	0	0	0	0	0	0	0	0	0	0	0	0	0
1017989201	0	0	0	0	0	0	0	0	0	0	0	0	0	0	0	0	0	0	0	0	0	0	0	0	0	0	0	0	0	0	0	0	0	0	0	0	0	0	0	0	0	0	0	0	0	0	0	0	0
1019424874	0	0	0	0	0	0	0	0	0	0	0	0	0	0	0	0	0	0	0	0	0	0	0	0	0	0	0	0	0	0	0	0	0	0	0	0	0	0	0	0	0	0	0	0	0	0	0	0	0
1019441558	0	0	0	0	0	0	0	0	0	0	0	0	0	0	0	0	0	0	0	0	0	0	0	0	0	0	0	0	0	0	0	0	0	0	0	0	0	0	0	0	0	0	0	0	0	0	0	0	0
1019446302	0	0	0	0	0	0	0	0	0	0	0	0	0	0	0	0	0	0	0	0	0	0	0	0	0	0	0	0	0	0	0	0	0	0	0	0	0	0	0	0	0	0	0	0	0	0	0	0	0
1019634644	0	0	0	0	0	0	0	0	0	0	0	0	0	0	0	0	0	0	0	0	0	0	0	0	0	0	0	0	0	0	0	0	0	0	0	0	0	0	0	0	0	0	0	0	0	0	0	0	0
1019740541	0	0	0	0	0	0	0	0	0	0	0	0	0	0	0	0	0	0	0	0	0	0	0	0	0	0	0	0	0	0	0	0	0	0	0	0	0	0	0	0	0	0	0	0	0	0	0	0	0
11522002	0	0	0	0	0	0	0	0	0	0	0	0	0	0	0	0	0	0	0	0	0	0	0	0	0	0	0	0	0	0	0	0	0	0	0	0	0	0	0	0	0	0	0	0	0	0	0	0	0
1015773686	0	0	0	0	0	0	0	0	0	0	0	0	0	0	0	0	0	0	0	0	0	0	0	0	0	0	0	0	0	0	0	0	0	0	0	0	0	0	0	0	0	0	0	0	0	0	0	0	0
1019952553	0	0	0	0	0	0	0	0	0	0	0	0	0	0	0	0	0	0	0	0	0	0	0	0	0	0	0	0	0	0	0	0	0	0	0	0	0	0	0	0	0	0	0	0	0	0	0	0	0
3194371	0	0	0	0	0	0	0	0	0	0	0	0	0	0	0	0	0	0	0	0	0	0	0	0	0	0	0	0	0	0	0	0	0	0	0	0	0	0	0	0	0	0	0	0	0	0	0	0	0
1019404293	0	0	0	0	0	0	0	0	0	0	0	0	0	0	0	0	0	0	0	0	0	0	0	0	0	0	0	0	0	0	0	0	0	0	0	0	0	0	0	0	0	0	0	0	0	0	0	0	0
1019407241	0	0	0	0	0	0	0	0	0	0	0	0	0	0	0	0	0	0	0	0	0	0	0	0	0	0	0	0	0	0	0	0	0	0	0	0	0	0	0	0	0	0	0	0	0	0	0	0	0
1019417295	0	0	0	0	0	0	0	0	0	0	0	0	0	0	0	0	0	0	0	0	0	0	0	0	0	0	0	0	0	0	0	0	0	0	0	0	0	0	0	0	0	0	0	0	0	0	0	0	0
1019603519	0	0	0	0	0	0	0	0	0	0	0	0	0	0	0	0	0	0	0	0	0	0	0	0	0	0	0	0	0	0	0	0	0	0	0	0	0	0	0	0	0	0	0	0	0	0	0	0	0
1021148156	0	0	0	0	0	0	0	0	0	0	0	0	0	0	0	0	0	0	0	0	0	0	0	0	0	0	0	0	0	0	0	0	0	0	0	0	0	0	0	0	0	0	0	0	0	0	0	0	0
1019748240	0	0	0	0	0	0	0	0	0	0	0	0	0	0	0	0	0	0	0	0	0	0	0	0	0	0	0	0	0	0	0	0	0	0	0	0	0	0	0	0	0	0	0	0	0	0	0	0	0
1019978995	0	0	0	0	0	0	0	0	0	0	0	0	0	0	0	0	0	0	0	0	0	0	0	0	0	0	0	0	0	0	0	0	0	0	0	0	0	0	0	0	0	0	0	0	0	0	0	0	0
1020849299	0	0	0	0	0	0	0	0	0	0	0	0	0	0	0	0	0	0	0	0	0	0	0	0	0	0	0	0	0	0	0	0	0	0	0	0	0	0	0	0	0	0	0	0	0	0	0	0	0
6160263	0	0	0	0	0	0	0	0	0	0	0	0	0	0	0	0	0	0	0	0	0	0	0	0	0	0	0	0	0	0	0	0	0	0	0	0	0	0	0	0	0	0	0	0	0	0	0	0	0
7009477	0	0	0	0	0	0	0	0	0	0	0	0	0	0	0	0	0	0	0	0	0	0	0	0	0	0	0	0	0	0	0	0	0	0	0	0	0	0	0	0	0	0	0	0	0	0	0	0	0
1021281369	0	0	0	0	0	0	0	0	0	0	0	0	0	0	0	0	0	0	0	0	0	0	0	0	0	0	0	0	0	0	0	0	0	0	0	0	0	0	0	0	0	0	0	0	0	0	0	0	0
1015904387	0	0	0	0	0	0	0	0	0	0	0	0	0	0	0	0	0	0	0	0	0	0	0	0	0	0	0	0	0	0	0	0	0	0	0	0	0	0	0	0	0	0	0	0	0	0	0	0	0
1020362812	0	0	0	0	0	0	0	0	0	0	0	0	0	0	0	0	0	0	0	0	0	0	0	0	0	0	0	0	0	0	0	0	0	0	0	0	0	0	0	0	0	0	0	0	0	0	0	0	0
1021754153	0	0	0	0	0	0	0	0	0	0	0	0	0	0	0	0	0	0	0	0	0	0	0	0	0	0	0	0	0	0	0	0	0	0	0	0	0	0	0	0	0	0	0	0	0	0	0	0	0
1021756364	0	0	0	0	0	0	0	0	0	0	0	0	0	0	0	0	0	0	0	0	0	0	0	0	0	0	0	0	0	0	0	0	0	0	0	0	0	0	0	0	0	0	0	0	0	0	0	0	0
4560530	0	0	0	0	0	0	0	0	0	0	0	0	0	0	0	0	0	0	0	0	0	0	0	0	0	0	0	0	0	0	0	0	0	0	0	0	0	0	0	0	0	0	0	0	0	0	0	0	0
1019705308	0	0	0	0	0	0	0	0	0	0	0	0	0	0	0	0	0	0	0	0	0	0	0	0	0	0	0	0	0	0	0	0	0	0	0	0	0	0	0	0	0	0	0	0	0	0	0	0	0
9746842	0	0	0	0	0	0	0	0	0	0	0	0	0	0	0	0	0	0	0	0	0	0	0	0	0	0	0	0	0	0	0	0	0	0	0	0	0	0	0	0	0	0	0	0	0	0	0	0	0
1019733258	0	0	0	0	0	0	0	0	0	0	0	0	0	0	0	0	0	0	0	0	0	0	0	0	0	0	0	0	0	0	0	0	0	0	0	0	0	0	0	0	0	0	0	0	0	0	0	0	0
12963769	0	0	0	0	0	0	0	0	0	0	0	0	0	0	0	0	0	0	0	0	0	0	0	0	0	0	0	0	0	0	0	0	0	0	0	0	0	0	0	0	0	0	0	0	0	0	0	0	0
1017977623	0	0	0	0	0	0	0	0	0	0	0	0	0	0	0	0	0	0	0	0	0	0	0	0	0	0	0	0	0	0	0	0	0	0	0	0	0	0	0	0	0	0	0	0	0	0	0	0	0
1019699453	0	0	0	0	0	0	0	0	0	0	0	0	0	0	0	0	0	0	0	0	0	0	0	0	0	0	0	0	0	0	0	0	0	0	0	0	0	0	0	0	0	0	0	0	0	0	0	0	0
1020969615	0	0	0	0	0	0	0	0	0	0	0	0	0	0	0	0	0	0	0	0	0	0	0	0	0	0	0	0	0	0	0	0	0	0	0	0	0	0	0	0	0	0	0	0	0	0	0	0	0
1021180828	0	0	0	0	0	0	0	0	0	0	0	0	0	0	0	0	0	0	0	0	0	0	0	0	0	0	0	0	0	0	0	0	0	0	0	0	0	0	0	0	0	0	0	0	0	0	0	0	0
1022259794	0	0	0	0	0	0	0	0	0	0	0	0	0	0	0	0	0	0	0	0	0	0	0	0	0	0	0	0	0	0	0	0	0	0	0	0	0	0	0	0	0	0	0	0	0	0	0	0	0
1019236107	0	0	0	0	0	0	0	0	0	0	0	0	0	0	0	0	0	0	0	0	0	0	0	0	0	0	0	0	0	0	0	0	0	0	0	0	0	0	0	0	0	0	0	0	0	0	0	0	0
7295636	0	0	0	0	0	0	0	0	0	0	0	0	0	0	0	0	0	0	0	0	0	0	0	0	0	0	0	0	0	0	0	0	0	0	0	0	0	0	0	0	0	0	0	0	0	0	0	0	0
1019941711	0	0	0	0	0	0	0	0	0	0	0	0	0	0	0	0	0	0	0	0	0	0	0	0	0	0	0	0	0	0	0	0	0	0	0	0	0	0	0	0	0	0	0	0	0	0	0	0	0
1015951883	0	0	0	0	0	0	0	0	0	0	0	0	0	0	0	0	0	0	0	0	0	0	0	0	0	0	0	0	0	0	0	0	0	0	0	0	0	0	0	0	0	0	0	0	0	0	0	0	0
1017812085	0	0	0	0	0	0	0	0	0	0	0	0	0	0	0	0	0	0	0	0	0	0	0	0	0	0	0	0	0	0	0	0	0	0	0	0	0	0	0	0	0	0	0	0	0	0	0	0	0
1019420370	0	0	0	0	0	0	0	0	0	0	0	0	0	0	0	0	0	0	0	0	0	0	0	0	0	0	0	0	0	0	0	0	0	0	0	0	0	0	0	0	0	0	0	0	0	0	0	0	0
1021782268	0	0	0	0	0	0	0	0	0	0	0	0	0	0	0	0	0	0	0	0	0	0	0	0	0	0	0	0	0	0	0	0	0	0	0	0	0	0	0	0	0	0	0	0	0	0	0	0	0
1017887637	0	0	0	0	0	0	0	0	0	0	0	0	0	0	0	0	0	0	0	0	0	0	0	0	0	0	0	0	0	0	0	0	0	0	0	0	0	0	0	0	0	0	0	0	0	0	0	0	0
1019946763	0	0	0	0	0	0	0	0	0	0	0	0	0	0	0	0	0	0	0	0	0	0	0	0	0	0	0	0	0	0	0	0	0	0	0	0	0	0	0	0	0	0	0	0	0	0	0	0	0
1021783653	0	0	0	0	0	0	0	0	0	0	0	0	0	0	0	0	0	0	0	0	0	0	0	0	0	0	0	0	0	0	0	0	0	0	0	0	0	0	0	0	0	0	0	0	0	0	0	0	0
1945001	0	0	0	0	0	0	0	0	0	0	0	0	0	0	0	0	0	0	0	0	0	0	0	0	0	0	0	0	0	0	0	0	0	0	0	0	0	0	0	0	0	0	0	0	0	0	0	0	0
1020379656	0	0	0	0	0	0	0	0	0	0	0	0	0	0	0	0	0	0	0	0	0	0	0	0	0	0	0	0	0	0	0	0	0	0	0	0	0	0	0	0	0	0	0	0	0	0	0	0	0
1020694861	0	0	0	0	0	0	0	0	0	0	0	0	0	0	0	0	0	0	0	0	0	0	0	0	0	0	0	0	0	0	0	0	0	0	0	0	0	0	0	0	0	0	0	0	0	0	0	0	0
1020777646	0	0	0	0	0	0	0	0	0	0	0	0	0	0	0	0	0	0	0	0	0	0	0	0	0	0	0	0	0	0	0	0	0	0	0	0	0	0	0	0	0	0	0	0	0	0	0	0	0
1021712965	0	0	0	0	0	0	0	0	0	0	0	0	0	0	0	0	0	0	0	0	0	0	0	0	0	0	0	0	0	0	0	0	0	0	0	0	0	0	0	0	0	0	0	0	0	0	0	0	0
1020883003	0	0	0	0	0	0	0	0	0	0	0	0	0	0	0	0	0	0	0	0	0	0	0	0	0	0	0	0	0	0	0	0	0	0	0	0	0	0	0	0	0	0	0	0	0	0	0	0	0
1022181385	0	0	0	0	0	0	0	0	0	0	0	0	0	0	0	0	0	0	0	0	0	0	0	0	0	0	0	0	0	0	0	0	0	0	0	0	0	0	0	0	0	0	0	0	0	0	0	0	0
9062327	0	0	0	0	0	0	0	0	0	0	0	0	0	0	0	0	0	0	0	0	0	0	0	0	0	0	0	0	0	0	0	0	0	0	0	0	0	0	0	0	0	0	0	0	0	0	0	0	0
1021821591	0	0	0	0	0	0	0	0	0	0	0	0	0	0	0	0	0	0	0	0	0	0	0	0	0	0	0	0	0	0	0	0	0	0	0	0	0	0	0	0	0	0	0	0	0	0	0	0	0
1018922039	0	0	0	0	0	0	0	0	0	0	0	0	0	0	0	0	0	0	0	0	0	0	0	0	0	0	0	0	0	0	0	0	0	0	0	0	0	0	0	0	0	0	0	0	0	0	0	0	0
1021536618	0	0	0	0	0	0	0	0	0	0	0	0	0	0	0	0	0	0	0	0	0	0	0	0	0	0	0	0	0	0	0	0	0	0	0	0	0	0	0	0	0	0	0	0	0	0	0	0	0
1021659818	0	0	0	0	0	0	0	0	0	0	0	0	0	0	0	0	0	0	0	0	0	0	0	0	0	0	0	0	0	0	0	0	0	0	0	0	0	0	0	0	0	0	0	0	0	0	0	0	0
1019751248	0	0	0	0	0	0	0	0	0	0	0	0	0	0	0	0	0	0	0	0	0	0	0	0	0	0	0	0	0	0	0	0	0	0	0	0	0	0	0	0	0	0	0	0	0	0	0	0	0
1021198840	0	0	0	0	0	0	0	0	0	0	0	0	0	0	0	0	0	0	0	0	0	0	0	0	0	0	0	0	0	0	0	0	0	0	0	0	0	0	0	0	0	0	0	0	0	0	0	0	0
1021538798	0	0	0	0	0	0	0	0	0	0	0	0	0	0	0	0	0	0	0	0	0	0	0	0	0	0	0	0	0	0	0	0	0	0	0	0	0	0	0	0	0	0	0	0	0	0	0	0	0
1020573774	0	0	0	0	0	0	0	0	0	0	0	0	0	0	0	0	0	0	0	0	0	0	0	0	0	0	0	0	0	0	0	0	0	0	0	0	0	0	0	0	0	0	0	0	0	0	0	0	0
1021844167	0	0	0	0	0	0	0	0	0	0	0	0	0	0	0	0	0	0	0	0	0	0	0	0	0	0	0	0	0	0	0	0	0	0	0	0	0	0	0	0	0	0	0	0	0	0	0	0	0
1018343564	0	0	0	0	0	0	0	0	0	0	0	0	0	0	0	0	0	0	0	0	0	0	0	0	0	0	0	0	0	0	0	0	0	0	0	0	0	0	0	0	0	0	0	0	0	0	0	0	0
1019472690	0	0	0	0	0	0	0	0	0	0	0	0	0	0	0	0	0	0	0	0	0	0	0	0	0	0	0	0	0	0	0	0	0	0	0	0	0	0	0	0	0	0	0	0	0	0	0	0	0
1017801437	0	0	0	0	0	0	0	0	0	0	0	0	0	0	0	0	0	0	0	0	0	0	0	0	0	0	0	0	0	0	0	0	0	0	0	0	0	0	0	0	0	0	0	0	0	0	0	0	0
4891633	0	0	0	0	0	0	0	0	0	0	0	0	0	0	0	0	0	0	0	0	0	0	0	0	0	0	0	0	0	0	0	0	0	0	0	0	0	0	0	0	0	0	0	0	0	0	0	0	0
1019934730	0	0	0	0	0	0	0	0	0	0	0	0	0	0	0	0	0	0	0	0	0	0	0	0	0	0	0	0	0	0	0	0	0	0	0	0	0	0	0	0	0	0	0	0	0	0	0	0	0
1021462759	0	0	0	0	0	0	0	0	0	0	0	0	0	0	0	0	0	0	0	0	0	0	0	0	0	0	0	0	0	0	0	0	0	0	0	0	0	0	0	0	0	0	0	0	0	0	0	0	0
1019689987	0	0	0	0	0	0	0	0	0	0	0	0	0	0	0	0	0	0	0	0	0	0	0	0	0	0	0	0	0	0	0	0	0	0	0	0	0	0	0	0	0	0	0	0	0	0	0	0	0
1020598920	0	0	0	0	0	0	0	0	0	0	0	0	0	0	0	0	0	0	0	0	0	0	0	0	0	0	0	0	0	0	0	0	0	0	0	0	0	0	0	0	0	0	0	0	0	0	0	0	0
1021732220	0	0	0	0	0	0	0	0	0	0	0	0	0	0	0	0	0	0	0	0	0	0	0	0	0	0	0	0	0	0	0	0	0	0	0	0	0	0	0	0	0	0	0	0	0	0	0	0	0
11728104	0	0	0	0	0	0	0	0	0	0	0	0	0	0	0	0	0	0	0	0	0	0	0	0	0	0	0	0	0	0	0	0	0	0	0	0	0	0	0	0	0	0	0	0	0	0	0	0	0
1017252254	0	0	0	0	0	0	0	0	0	0	0	0	0	0	0	0	0	0	0	0	0	0	0	0	0	0	0	0	0	0	0	0	0	0	0	0	0	0	0	0	0	0	0	0	0	0	0	0	0
1021512885	0	0	0	0	0	0	0	0	0	0	0	0	0	0	0	0	0	0	0	0	0	0	0	0	0	0	0	0	0	0	0	0	0	0	0	0	0	0	0	0	0	0	0	0	0	0	0	0	0
1020192254	0	0	0	0	0	0	0	0	0	0	0	0	0	0	0	0	0	0	0	0	0	0	0	0	0	0	0	0	0	0	0	0	0	0	0	0	0	0	0	0	0	0	0	0	0	0	0	0	0
1019536837	0	0	0	0	0	0	0	0	0	0	0	0	0	0	0	0	0	0	0	0	0	0	0	0	0	0	0	0	0	0	0	0	0	0	0	0	0	0	0	0	0	0	0	0	0	0	0	0	0
1021763320	0	0	0	0	0	0	0	0	0	0	0	0	0	0	0	0	0	0	0	0	0	0	0	0	0	0	0	0	0	0	0	0	0	0	0	0	0	0	0	0	0	0	0	0	0	0	0	0	0
1021543943	0	0	0	0	0	0	0	0	0	0	0	0	0	0	0	0	0	0	0	0	0	0	0	0	0	0	0	0	0	0	0	0	0	0	0	0	0	0	0	0	0	0	0	0	0	0	0	0	0
1021600901	0	0	0	0	0	0	0	0	0	0	0	0	0	0	0	0	0	0	0	0	0	0	0	0	0	0	0	0	0	0	0	0	0	0	0	0	0	0	0	0	0	0	0	0	0	0	0	0	0
1021763374	0	0	0	0	0	0	0	0	0	0	0	0	0	0	0	0	0	0	0	0	0	0	0	0	0	0	0	0	0	0	0	0	0	0	0	0	0	0	0	0	0	0	0	0	0	0	0	0	0
9813344	0	0	0	0	0	0	0	0	0	0	0	0	0	0	0	0	0	0	0	0	0	0	0	0	0	0	0	0	0	0	0	0	0	0	0	0	0	0	0	0	0	0	0	0	0	0	0	0	0
6160409	0	0	0	0	0	0	0	0	0	0	0	0	0	0	0	0	0	0	0	0	0	0	0	0	0	0	0	0	0	0	0	0	0	0	0	0	0	0	0	0	0	0	0	0	0	0	0	0	0
1020522278	0	0	0	0	0	0	0	0	0	0	0	0	0	0	0	0	0	0	0	0	0	0	0	0	0	0	0	0	0	0	0	0	0	0	0	0	0	0	0	0	0	0	0	0	0	0	0	0	0
1020896454	0	0	0	0	0	0	0	0	0	0	0	0	0	0	0	0	0	0	0	0	0	0	0	0	0	0	0	0	0	0	0	0	0	0	0	0	0	0	0	0	0	0	0	0	0	0	0	0	0
1020772710	0	0	0	0	0	0	0	0	0	0	0	0	0	0	0	0	0	0	0	0	0	0	0	0	0	0	0	0	0	0	0	0	0	0	0	0	0	0	0	0	0	0	0	0	0	0	0	0	0
1021628501	0	0	0	0	0	0	0	0	0	0	0	0	0	0	0	0	0	0	0	0	0	0	0	0	0	0	0	0	0	0	0	0	0	0	0	0	0	0	0	0	0	0	0	0	0	0	0	0	0
5962689	0	0	0	0	0	0	0	0	0	0	0	0	0	0	0	0	0	0	0	0	0	0	0	0	0	0	0	0	0	0	0	0	0	0	0	0	0	0	0	0	0	0	0	0	0	0	0	0	0
8337493	0	0	0	0	0	0	0	0	0	0	0	0	0	0	0	0	0	0	0	0	0	0	0	0	0	0	0	0	0	0	0	0	0	0	0	0	0	0	0	0	0	0	0	0	0	0	0	0	0
1020600494	0	0	0	0	0	0	0	0	0	0	0	0	0	0	0	0	0	0	0	0	0	0	0	0	0	0	0	0	0	0	0	0	0	0	0	0	0	0	0	0	0	0	0	0	0	0	0	0	0
1021255556	0	0	0	0	0	0	0	0	0	0	0	0	0	0	0	0	0	0	0	0	0	0	0	0	0	0	0	0	0	0	0	0	0	0	0	0	0	0	0	0	0	0	0	0	0	0	0	0	0
12167003	0	0	0	0	0	0	0	0	0	0	0	0	0	0	0	0	0	0	0	0	0	0	0	0	0	0	0	0	0	0	0	0	0	0	0	0	0	0	0	0	0	0	0	0	0	0	0	0	0
1021600221	0	0	0	0	0	0	0	0	0	0	0	0	0	0	0	0	0	0	0	0	0	0	0	0	0	0	0	0	0	0	0	0	0	0	0	0	0	0	0	0	0	0	0	0	0	0	0	0	0
1021699767	0	0	0	0	0	0	0	0	0	0	0	0	0	0	0	0	0	0	0	0	0	0	0	0	0	0	0	0	0	0	0	0	0	0	0	0	0	0	0	0	0	0	0	0	0	0	0	0	0
1021949767	0	0	0	0	0	0	0	0	0	0	0	0	0	0	0	0	0	0	0	0	0	0	0	0	0	0	0	0	0	0	0	0	0	0	0	0	0	0	0	0	0	0	0	0	0	0	0	0	0
1021516773	0	0	0	0	0	0	0	0	0	0	0	0	0	0	0	0	0	0	0	0	0	0	0	0	0	0	0	0	0	0	0	0	0	0	0	0	0	0	0	0	0	0	0	0	0	0	0	0	0
1021538035	0	0	0	0	0	0	0	0	0	0	0	0	0	0	0	0	0	0	0	0	0	0	0	0	0	0	0	0	0	0	0	0	0	0	0	0	0	0	0	0	0	0	0	0	0	0	0	0	0
1017966183	0	0	0	0	0	0	0	0	0	0	0	0	0	0	0	0	0	0	0	0	0	0	0	0	0	0	0	0	0	0	0	0	0	0	0	0	0	0	0	0	0	0	0	0	0	0	0	0	0
1019463321	0	0	0	0	0	0	0	0	0	0	0	0	0	0	0	0	0	0	0	0	0	0	0	0	0	0	0	0	0	0	0	0	0	0	0	0	0	0	0	0	0	0	0	0	0	0	0	0	0
1021914160	0	0	0	0	0	0	0	0	0	0	0	0	0	0	0	0	0	0	0	0	0	0	0	0	0	0	0	0	0	0	0	0	0	0	0	0	0	0	0	0	0	0	0	0	0	0	0	0	0
1019669119	0	0	0	0	0	0	0	0	0	0	0	0	0	0	0	0	0	0	0	0	0	0	0	0	0	0	0	0	0	0	0	0	0	0	0	0	0	0	0	0	0	0	0	0	0	0	0	0	0
1019800058	0	0	0	0	0	0	0	0	0	0	0	0	0	0	0	0	0	0	0	0	0	0	0	0	0	0	0	0	0	0	0	0	0	0	0	0	0	0	0	0	0	0	0	0	0	0	0	0	0
1021138437	0	0	0	0	0	0	0	0	0	0	0	0	0	0	0	0	0	0	0	0	0	0	0	0	0	0	0	0	0	0	0	0	0	0	0	0	0	0	0	0	0	0	0	0	0	0	0	0	0
1020397023	0	0	0	0	0	0	0	0	0	0	0	0	0	0	0	0	0	0	0	0	0	0	0	0	0	0	0	0	0	0	0	0	0	0	0	0	0	0	0	0	0	0	0	0	0	0	0	0	0
1021021492	0	0	0	0	0	0	0	0	0	0	0	0	0	0	0	0	0	0	0	0	0	0	0	0	0	0	0	0	0	0	0	0	0	0	0	0	0	0	0	0	0	0	0	0	0	0	0	0	0
1021212650	0	0	0	0	0	0	0	0	0	0	0	0	0	0	0	0	0	0	0	0	0	0	0	0	0	0	0	0	0	0	0	0	0	0	0	0	0	0	0	0	0	0	0	0	0	0	0	0	0
1021525500	0	0	0	0	0	0	0	0	0	0	0	0	0	0	0	0	0	0	0	0	0	0	0	0	0	0	0	0	0	0	0	0	0	0	0	0	0	0	0	0	0	0	0	0	0	0	0	0	0
1019763732	0	0	0	0	0	0	0	0	0	0	0	0	0	0	0	0	0	0	0	0	0	0	0	0	0	0	0	0	0	0	0	0	0	0	0	0	0	0	0	0	0	0	0	0	0	0	0	0	0
1019918703	0	0	0	0	0	0	0	0	0	0	0	0	0	0	0	0	0	0	0	0	0	0	0	0	0	0	0	0	0	0	0	0	0	0	0	0	0	0	0	0	0	0	0	0	0	0	0	0	0
1020116233	0	0	0	0	0	0	0	0	0	0	0	0	0	0	0	0	0	0	0	0	0	0	0	0	0	0	0	0	0	0	0	0	0	0	0	0	0	0	0	0	0	0	0	0	0	0	0	0	0
1020269485	0	0	0	0	0	0	0	0	0	0	0	0	0	0	0	0	0	0	0	0	0	0	0	0	0	0	0	0	0	0	0	0	0	0	0	0	0	0	0	0	0	0	0	0	0	0	0	0	0
540329	0	0	0	0	0	0	0	0	0	0	0	0	0	0	0	0	0	0	0	0	0	0	0	0	0	0	0	0	0	0	0	0	0	0	0	0	0	0	0	0	0	0	0	0	0	0	0	0	0
1019693386	0	0	0	0	0	0	0	0	0	0	0	0	0	0	0	0	0	0	0	0	0	0	0	0	0	0	0	0	0	0	0	0	0	0	0	0	0	0	0	0	0	0	0	0	0	0	0	0	0
1019928484	0	0	0	0	0	0	0	0	0	0	0	0	0	0	0	0	0	0	0	0	0	0	0	0	0	0	0	0	0	0	0	0	0	0	0	0	0	0	0	0	0	0	0	0	0	0	0	0	0
1020446070	0	0	0	0	0	0	0	0	0	0	0	0	0	0	0	0	0	0	0	0	0	0	0	0	0	0	0	0	0	0	0	0	0	0	0	0	0	0	0	0	0	0	0	0	0	0	0	0	0
1019744241	0	0	0	0	0	0	0	0	0	0	0	0	0	0	0	0	0	0	0	0	0	0	0	0	0	0	0	0	0	0	0	0	0	0	0	0	0	0	0	0	0	0	0	0	0	0	0	0	0
1020257831	0	0	0	0	0	0	0	0	0	0	0	0	0	0	0	0	0	0	0	0	0	0	0	0	0	0	0	0	0	0	0	0	0	0	0	0	0	0	0	0	0	0	0	0	0	0	0	0	0
1019733138	0	0	0	0	0	0	0	0	0	0	0	0	0	0	0	0	0	0	0	0	0	0	0	0	0	0	0	0	0	0	0	0	0	0	0	0	0	0	0	0	0	0	0	0	0	0	0	0	0
1021621096	0	0	0	0	0	0	0	0	0	0	0	0	0	0	0	0	0	0	0	0	0	0	0	0	0	0	0	0	0	0	0	0	0	0	0	0	0	0	0	0	0	0	0	0	0	0	0	0	0
1019619293	0	0	0	0	0	0	0	0	0	0	0	0	0	0	0	0	0	0	0	0	0	0	0	0	0	0	0	0	0	0	0	0	0	0	0	0	0	0	0	0	0	0	0	0	0	0	0	0	0
1019740427	0	0	0	0	0	0	0	0	0	0	0	0	0	0	0	0	0	0	0	0	0	0	0	0	0	0	0	0	0	0	0	0	0	0	0	0	0	0	0	0	0	0	0	0	0	0	0	0	0
1019759243	0	0	0	0	0	0	0	0	0	0	0	0	0	0	0	0	0	0	0	0	0	0	0	0	0	0	0	0	0	0	0	0	0	0	0	0	0	0	0	0	0	0	0	0	0	0	0	0	0
1019538127	0	0	0	0	0	0	0	0	0	0	0	0	0	0	0	0	0	0	0	0	0	0	0	0	0	0	0	0	0	0	0	0	0	0	0	0	0	0	0	0	0	0	0	0	0	0	0	0	0
1019588353	0	0	0	0	0	0	0	0	0	0	0	0	0	0	0	0	0	0	0	0	0	0	0	0	0	0	0	0	0	0	0	0	0	0	0	0	0	0	0	0	0	0	0	0	0	0	0	0	0
1019625896	0	0	0	0	0	0	0	0	0	0	0	0	0	0	0	0	0	0	0	0	0	0	0	0	0	0	0	0	0	0	0	0	0	0	0	0	0	0	0	0	0	0	0	0	0	0	0	0	0
1019689872	0	0	0	0	0	0	0	0	0	0	0	0	0	0	0	0	0	0	0	0	0	0	0	0	0	0	0	0	0	0	0	0	0	0	0	0	0	0	0	0	0	0	0	0	0	0	0	0	0
1021278022	0	0	0	0	0	0	0	0	0	0	0	0	0	0	0	0	0	0	0	0	0	0	0	0	0	0	0	0	0	0	0	0	0	0	0	0	0	0	0	0	0	0	0	0	0	0	0	0	0
1021622281	0	0	0	0	0	0	0	0	0	0	0	0	0	0	0	0	0	0	0	0	0	0	0	0	0	0	0	0	0	0	0	0	0	0	0	0	0	0	0	0	0	0	0	0	0	0	0	0	0
11588076	0	0	0	0	0	0	0	0	0	0	0	0	0	0	0	0	0	0	0	0	0	0	0	0	0	0	0	0	0	0	0	0	0	0	0	0	0	0	0	0	0	0	0	0	0	0	0	0	0
1020496485	0	0	0	0	0	0	0	0	0	0	0	0	0	0	0	0	0	0	0	0	0	0	0	0	0	0	0	0	0	0	0	0	0	0	0	0	0	0	0	0	0	0	0	0	0	0	0	0	0
1020684735	0	0	0	0	0	0	0	0	0	0	0	0	0	0	0	0	0	0	0	0	0	0	0	0	0	0	0	0	0	0	0	0	0	0	0	0	0	0	0	0	0	0	0	0	0	0	0	0	0
11065966	0	0	0	0	0	0	0	0	0	0	0	0	0	0	0	0	0	0	0	0	0	0	0	0	0	0	0	0	0	0	0	0	0	0	0	0	0	0	0	0	0	0	0	0	0	0	0	0	0
1021237220	0	0	0	0	0	0	0	0	0	0	0	0	0	0	0	0	0	0	0	0	0	0	0	0	0	0	0	0	0	0	0	0	0	0	0	0	0	0	0	0	0	0	0	0	0	0	0	0	0
1019586182	0	0	0	0	0	0	0	0	0	0	0	0	0	0	0	0	0	0	0	0	0	0	0	0	0	0	0	0	0	0	0	0	0	0	0	0	0	0	0	0	0	0	0	0	0	0	0	0	0
1015564941	0	0	0	0	0	0	0	0	0	0	0	0	0	0	0	0	0	0	0	0	0	0	0	0	0	0	0	0	0	0	0	0	0	0	0	0	0	0	0	0	0	0	0	0	0	0	0	0	0
1019810136	0	0	0	0	0	0	0	0	0	0	0	0	0	0	0	0	0	0	0	0	0	0	0	0	0	0	0	0	0	0	0	0	0	0	0	0	0	0	0	0	0	0	0	0	0	0	0	0	0
1020866681	0	0	0	0	0	0	0	0	0	0	0	0	0	0	0	0	0	0	0	0	0	0	0	0	0	0	0	0	0	0	0	0	0	0	0	0	0	0	0	0	0	0	0	0	0	0	0	0	0
1019258227	0	0	0	0	0	0	0	0	0	0	0	0	0	0	0	0	0	0	0	0	0	0	0	0	0	0	0	0	0	0	0	0	0	0	0	0	0	0	0	0	0	0	0	0	0	0	0	0	0
1019220768	0	0	0	0	0	0	0	0	0	0	0	0	0	0	0	0	0	0	0	0	0	0	0	0	0	0	0	0	0	0	0	0	0	0	0	0	0	0	0	0	0	0	0	0	0	0	0	0	0
1021624208	0	0	0	0	0	0	0	0	0	0	0	0	0	0	0	0	0	0	0	0	0	0	0	0	0	0	0	0	0	0	0	0	0	0	0	0	0	0	0	0	0	0	0	0	0	0	0	0	0
1021090942	0	0	0	0	0	0	0	0	0	0	0	0	0	0	0	0	0	0	0	0	0	0	0	0	0	0	0	0	0	0	0	0	0	0	0	0	0	0	0	0	0	0	0	0	0	0	0	0	0
1020585890	0	0	0	0	0	0	0	0	0	0	0	0	0	0	0	0	0	0	0	0	0	0	0	0	0	0	0	0	0	0	0	0	0	0	0	0	0	0	0	0	0	0	0	0	0	0	0	0	0
1021704030	0	0	0	0	0	0	0	0	0	0	0	0	0	0	0	0	0	0	0	0	0	0	0	0	0	0	0	0	0	0	0	0	0	0	0	0	0	0	0	0	0	0	0	0	0	0	0	0	0
1019689817	0	0	0	0	0	0	0	0	0	0	0	0	0	0	0	0	0	0	0	0	0	0	0	0	0	0	0	0	0	0	0	0	0	0	0	0	0	0	0	0	0	0	0	0	0	0	0	0	0
1021620417	0	0	0	0	0	0	0	0	0	0	0	0	0	0	0	0	0	0	0	0	0	0	0	0	0	0	0	0	0	0	0	0	0	0	0	0	0	0	0	0	0	0	0	0	0	0	0	0	0
1021316049	0	0	0	0	0	0	0	0	0	0	0	0	0	0	0	0	0	0	0	0	0	0	0	0	0	0	0	0	0	0	0	0	0	0	0	0	0	0	0	0	0	0	0	0	0	0	0	0	0
1020923887	0	0	0	0	0	0	0	0	0	0	0	0	0	0	0	0	0	0	0	0	0	0	0	0	0	0	0	0	0	0	0	0	0	0	0	0	0	0	0	0	0	0	0	0	0	0	0	0	0
1021756638	0	0	0	0	0	0	0	0	0	0	0	0	0	0	0	0	0	0	0	0	0	0	0	0	0	0	0	0	0	0	0	0	0	0	0	0	0	0	0	0	0	0	0	0	0	0	0	0	0
1021819429	0	0	0	0	0	0	0	0	0	0	0	0	0	0	0	0	0	0	0	0	0	0	0	0	0	0	0	0	0	0	0	0	0	0	0	0	0	0	0	0	0	0	0	0	0	0	0	0	0
1022002947	0	0	0	0	0	0	0	0	0	0	0	0	0	0	0	0	0	0	0	0	0	0	0	0	0	0	0	0	0	0	0	0	0	0	0	0	0	0	0	0	0	0	0	0	0	0	0	0	0
1018043218	0	0	0	0	0	0	0	0	0	0	0	0	0	0	0	0	0	0	0	0	0	0	0	0	0	0	0	0	0	0	0	0	0	0	0	0	0	0	0	0	0	0	0	0	0	0	0	0	0
1019464605	0	0	0	0	0	0	0	0	0	0	0	0	0	0	0	0	0	0	0	0	0	0	0	0	0	0	0	0	0	0	0	0	0	0	0	0	0	0	0	0	0	0	0	0	0	0	0	0	0
1019698130	0	0	0	0	0	0	0	0	0	0	0	0	0	0	0	0	0	0	0	0	0	0	0	0	0	0	0	0	0	0	0	0	0	0	0	0	0	0	0	0	0	0	0	0	0	0	0	0	0
1022323412	0	0	0	0	0	0	0	0	0	0	0	0	0	0	0	0	0	0	0	0	0	0	0	0	0	0	0	0	0	0	0	0	0	0	0	0	0	0	0	0	0	0	0	0	0	0	0	0	0
1018269314	0	0	0	0	0	0	0	0	0	0	0	0	0	0	0	0	0	0	0	0	0	0	0	0	0	0	0	0	0	0	0	0	0	0	0	0	0	0	0	0	0	0	0	0	0	0	0	0	0
1021323478	0	0	0	0	0	0	0	0	0	0	0	0	0	0	0	0	0	0	0	0	0	0	0	0	0	0	0	0	0	0	0	0	0	0	0	0	0	0	0	0	0	0	0	0	0	0	0	0	0
1021685752	0	0	0	0	0	0	0	0	0	0	0	0	0	0	0	0	0	0	0	0	0	0	0	0	0	0	0	0	0	0	0	0	0	0	0	0	0	0	0	0	0	0	0	0	0	0	0	0	0
1021686580	0	0	0	0	0	0	0	0	0	0	0	0	0	0	0	0	0	0	0	0	0	0	0	0	0	0	0	0	0	0	0	0	0	0	0	0	0	0	0	0	0	0	0	0	0	0	0	0	0
1021792177	0	0	0	0	0	0	0	0	0	0	0	0	0	0	0	0	0	0	0	0	0	0	0	0	0	0	0	0	0	0	0	0	0	0	0	0	0	0	0	0	0	0	0	0	0	0	0	0	0
1021732790	0	0	0	0	0	0	0	0	0	0	0	0	0	0	0	0	0	0	0	0	0	0	0	0	0	0	0	0	0	0	0	0	0	0	0	0	0	0	0	0	0	0	0	0	0	0	0	0	0
1021944191	0	0	0	0	0	0	0	0	0	0	0	0	0	0	0	0	0	0	0	0	0	0	0	0	0	0	0	0	0	0	0	0	0	0	0	0	0	0	0	0	0	0	0	0	0	0	0	0	0
1021216611	0	0	0	0	0	0	0	0	0	0	0	0	0	0	0	0	0	0	0	0	0	0	0	0	0	0	0	0	0	0	0	0	0	0	0	0	0	0	0	0	0	0	0	0	0	0	0	0	0
1021629209	0	0	0	0	0	0	0	0	0	0	0	0	0	0	0	0	0	0	0	0	0	0	0	0	0	0	0	0	0	0	0	0	0	0	0	0	0	0	0	0	0	0	0	0	0	0	0	0	0
1021718422	0	0	0	0	0	0	0	0	0	0	0	0	0	0	0	0	0	0	0	0	0	0	0	0	0	0	0	0	0	0	0	0	0	0	0	0	0	0	0	0	0	0	0	0	0	0	0	0	0
1019526038	0	0	0	0	0	0	0	0	0	0	0	0	0	0	0	0	0	0	0	0	0	0	0	0	0	0	0	0	0	0	0	0	0	0	0	0	0	0	0	0	0	0	0	0	0	0	0	0	0
1021740723	0	0	0	0	0	0	0	0	0	0	0	0	0	0	0	0	0	0	0	0	0	0	0	0	0	0	0	0	0	0	0	0	0	0	0	0	0	0	0	0	0	0	0	0	0	0	0	0	0
1020366316	0	0	0	0	0	0	0	0	0	0	0	0	0	0	0	0	0	0	0	0	0	0	0	0	0	0	0	0	0	0	0	0	0	0	0	0	0	0	0	0	0	0	0	0	0	0	0	0	0
1021516941	0	0	0	0	0	0	0	0	0	0	0	0	0	0	0	0	0	0	0	0	0	0	0	0	0	0	0	0	0	0	0	0	0	0	0	0	0	0	0	0	0	0	0	0	0	0	0	0	0
8636292	0	0	0	0	0	0	0	0	0	0	0	0	0	0	0	0	0	0	0	0	0	0	0	0	0	0	0	0	0	0	0	0	0	0	0	0	0	0	0	0	0	0	0	0	0	0	0	0	0
1017862393	0	0	0	0	0	0	0	0	0	0	0	0	0	0	0	0	0	0	0	0	0	0	0	0	0	0	0	0	0	0	0	0	0	0	0	0	0	0	0	0	0	0	0	0	0	0	0	0	0
1022346419	0	0	0	0	0	0	0	0	0	0	0	0	0	0	0	0	0	0	0	0	0	0	0	0	0	0	0	0	0	0	0	0	0	0	0	0	0	0	0	0	0	0	0	0	0	0	0	0	0
1021602890	0	0	0	0	0	0	0	0	0	0	0	0	0	0	0	0	0	0	0	0	0	0	0	0	0	0	0	0	0	0	0	0	0	0	0	0	0	0	0	0	0	0	0	0	0	0	0	0	0
1022229409	0	0	0	0	0	0	0	0	0	0	0	0	0	0	0	0	0	0	0	0	0	0	0	0	0	0	0	0	0	0	0	0	0	0	0	0	0	0	0	0	0	0	0	0	0	0	0	0	0
1022024214	0	0	0	0	0	0	0	0	0	0	0	0	0	0	0	0	0	0	0	0	0	0	0	0	0	0	0	0	0	0	0	0	0	0	0	0	0	0	0	0	0	0	0	0	0	0	0	0	0
1021693442	0	0	0	0	0	0	0	0	0	0	0	0	0	0	0	0	0	0	0	0	0	0	0	0	0	0	0	0	0	0	0	0	0	0	0	0	0	0	0	0	0	0	0	0	0	0	0	0	0
2674362	0	0	0	0	0	0	0	0	0	0	0	0	0	0	0	0	0	0	0	0	0	0	0	0	0	0	0	0	0	0	0	0	0	0	0	0	0	0	0	0	0	0	0	0	0	0	0	0	0
1021665488	0	0	0	0	0	0	0	0	0	0	0	0	0	0	0	0	0	0	0	0	0	0	0	0	0	0	0	0	0	0	0	0	0	0	0	0	0	0	0	0	0	0	0	0	0	0	0	0	0
9288259	0	0	0	0	0	0	0	0	0	0	0	0	0	0	0	0	0	0	0	0	0	0	0	0	0	0	0	0	0	0	0	0	0	0	0	0	0	0	0	0	0	0	0	0	0	0	0	0	0
1020681468	0	0	0	0	0	0	0	0	0	0	0	0	0	0	0	0	0	0	0	0	0	0	0	0	0	0	0	0	0	0	0	0	0	0	0	0	0	0	0	0	0	0	0	0	0	0	0	0	0
1021655562	0	0	0	0	0	0	0	0	0	0	0	0	0	0	0	0	0	0	0	0	0	0	0	0	0	0	0	0	0	0	0	0	0	0	0	0	0	0	0	0	0	0	0	0	0	0	0	0	0
1020277309	0	0	0	0	0	0	0	0	0	0	0	0	0	0	0	0	0	0	0	0	0	0	0	0	0	0	0	0	0	0	0	0	0	0	0	0	0	0	0	0	0	0	0	0	0	0	0	0	0
1022030591	0	0	0	0	0	0	0	0	0	0	0	0	0	0	0	0	0	0	0	0	0	0	0	0	0	0	0	0	0	0	0	0	0	0	0	0	0	0	0	0	0	0	0	0	0	0	0	0	0
1022227043	0	0	0	0	0	0	0	0	0	0	0	0	0	0	0	0	0	0	0	0	0	0	0	0	0	0	0	0	0	0	0	0	0	0	0	0	0	0	0	0	0	0	0	0	0	0	0	0	0
1021588324	0	0	0	0	0	0	0	0	0	0	0	0	0	0	0	0	0	0	0	0	0	0	0	0	0	0	0	0	0	0	0	0	0	0	0	0	0	0	0	0	0	0	0	0	0	0	0	0	0
1017506072	0	0	0	0	0	0	0	0	0	0	0	0	0	0	0	0	0	0	0	0	0	0	0	0	0	0	0	0	0	0	0	0	0	0	0	0	0	0	0	0	0	0	0	0	0	0	0	0	0
1021697596	0	0	0	0	0	0	0	0	0	0	0	0	0	0	0	0	0	0	0	0	0	0	0	0	0	0	0	0	0	0	0	0	0	0	0	0	0	0	0	0	0	0	0	0	0	0	0	0	0
4757558	0	0	0	0	0	0	0	0	0	0	0	0	0	0	0	0	0	0	0	0	0	0	0	0	0	0	0	0	0	0	0	0	0	0	0	0	0	0	0	0	0	0	0	0	0	0	0	0	0
1019944634	0	0	0	0	0	0	0	0	0	0	0	0	0	0	0	0	0	0	0	0	0	0	0	0	0	0	0	0	0	0	0	0	0	0	0	0	0	0	0	0	0	0	0	0	0	0	0	0	0
1019163320	0	0	0	0	0	0	0	0	0	0	0	0	0	0	0	0	0	0	0	0	0	0	0	0	0	0	0	0	0	0	0	0	0	0	0	0	0	0	0	0	0	0	0	0	0	0	0	0	0
1019496135	0	0	0	0	0	0	0	0	0	0	0	0	0	0	0	0	0	0	0	0	0	0	0	0	0	0	0	0	0	0	0	0	0	0	0	0	0	0	0	0	0	0	0	0	0	0	0	0	0
1021909991	0	0	0	0	0	0	0	0	0	0	0	0	0	0	0	0	0	0	0	0	0	0	0	0	0	0	0	0	0	0	0	0	0	0	0	0	0	0	0	0	0	0	0	0	0	0	0	0	0
1021113226	0	0	0	0	0	0	0	0	0	0	0	0	0	0	0	0	0	0	0	0	0	0	0	0	0	0	0	0	0	0	0	0	0	0	0	0	0	0	0	0	0	0	0	0	0	0	0	0	0
1020019846	0	0	0	0	0	0	0	0	0	0	0	0	0	0	0	0	0	0	0	0	0	0	0	0	0	0	0	0	0	0	0	0	0	0	0	0	0	0	0	0	0	0	0	0	0	0	0	0	0
1021783355	0	0	0	0	0	0	0	0	0	0	0	0	0	0	0	0	0	0	0	0	0	0	0	0	0	0	0	0	0	0	0	0	0	0	0	0	0	0	0	0	0	0	0	0	0	0	0	0	0
10882845	0	0	0	0	0	0	0	0	0	0	0	0	0	0	0	0	0	0	0	0	0	0	0	0	0	0	0	0	0	0	0	0	0	0	0	0	0	0	0	0	0	0	0	0	0	0	0	0	0
6380421	0	0	0	0	0	0	0	0	0	0	0	0	0	0	0	0	0	0	0	0	0	0	0	0	0	0	0	0	0	0	0	0	0	0	0	0	0	0	0	0	0	0	0	0	0	0	0	0	0
1021864218	0	0	0	0	0	0	0	0	0	0	0	0	0	0	0	0	0	0	0	0	0	0	0	0	0	0	0	0	0	0	0	0	0	0	0	0	0	0	0	0	0	0	0	0	0	0	0	0	0
1019542705	0	0	0	0	0	0	0	0	0	0	0	0	0	0	0	0	0	0	0	0	0	0	0	0	0	0	0	0	0	0	0	0	0	0	0	0	0	0	0	0	0	0	0	0	0	0	0	0	0
1020628412	0	0	0	0	0	0	0	0	0	0	0	0	0	0	0	0	0	0	0	0	0	0	0	0	0	0	0	0	0	0	0	0	0	0	0	0	0	0	0	0	0	0	0	0	0	0	0	0	0
1021845601	0	0	0	0	0	0	0	0	0	0	0	0	0	0	0	0	0	0	0	0	0	0	0	0	0	0	0	0	0	0	0	0	0	0	0	0	0	0	0	0	0	0	0	0	0	0	0	0	0
1019775100	0	0	0	0	0	0	0	0	0	0	0	0	0	0	0	0	0	0	0	0	0	0	0	0	0	0	0	0	0	0	0	0	0	0	0	0	0	0	0	0	0	0	0	0	0	0	0	0	0
1015919029	0	0	0	0	0	0	0	0	0	0	0	0	0	0	0	0	0	0	0	0	0	0	0	0	0	0	0	0	0	0	0	0	0	0	0	0	0	0	0	0	0	0	0	0	0	0	0	0	0
1021145016	0	0	0	0	0	0	0	0	0	0	0	0	0	0	0	0	0	0	0	0	0	0	0	0	0	0	0	0	0	0	0	0	0	0	0	0	0	0	0	0	0	0	0	0	0	0	0	0	0
1021886154	0	0	0	0	0	0	0	0	0	0	0	0	0	0	0	0	0	0	0	0	0	0	0	0	0	0	0	0	0	0	0	0	0	0	0	0	0	0	0	0	0	0	0	0	0	0	0	0	0
1022180123	0	0	0	0	0	0	0	0	0	0	0	0	0	0	0	0	0	0	0	0	0	0	0	0	0	0	0	0	0	0	0	0	0	0	0	0	0	0	0	0	0	0	0	0	0	0	0	0	0
1021650496	0	0	0	0	0	0	0	0	0	0	0	0	0	0	0	0	0	0	0	0	0	0	0	0	0	0	0	0	0	0	0	0	0	0	0	0	0	0	0	0	0	0	0	0	0	0	0	0	0
1020389532	0	0	0	0	0	0	0	0	0	0	0	0	0	0	0	0	0	0	0	0	0	0	0	0	0	0	0	0	0	0	0	0	0	0	0	0	0	0	0	0	0	0	0	0	0	0	0	0	0
10784809	0	0	0	0	0	0	0	0	0	0	0	0	0	0	0	0	0	0	0	0	0	0	0	0	0	0	0	0	0	0	0	0	0	0	0	0	0	0	0	0	0	0	0	0	0	0	0	0	0
1021868435	0	0	0	0	0	0	0	0	0	0	0	0	0	0	0	0	0	0	0	0	0	0	0	0	0	0	0	0	0	0	0	0	0	0	0	0	0	0	0	0	0	0	0	0	0	0	0	0	0
1019679591	0	0	0	0	0	0	0	0	0	0	0	0	0	0	0	0	0	0	0	0	0	0	0	0	0	0	0	0	0	0	0	0	0	0	0	0	0	0	0	0	0	0	0	0	0	0	0	0	0
1022003494	0	0	0	0	0	0	0	0	0	0	0	0	0	0	0	0	0	0	0	0	0	0	0	0	0	0	0	0	0	0	0	0	0	0	0	0	0	0	0	0	0	0	0	0	0	0	0	0	0
10368155	0	0	0	0	0	0	0	0	0	0	0	0	0	0	0	0	0	0	0	0	0	0	0	0	0	0	0	0	0	0	0	0	0	0	0	0	0	0	0	0	0	0	0	0	0	0	0	0	0
7309789	0	0	0	0	0	0	0	0	0	0	0	0	0	0	0	0	0	0	0	0	0	0	0	0	0	0	0	0	0	0	0	0	0	0	0	0	0	0	0	0	0	0	0	0	0	0	0	0	0
1018235833	0	0	0	0	0	0	0	0	0	0	0	0	0	0	0	0	0	0	0	0	0	0	0	0	0	0	0	0	0	0	0	0	0	0	0	0	0	0	0	0	0	0	0	0	0	0	0	0	0
1021128355	0	0	0	0	0	0	0	0	0	0	0	0	0	0	0	0	0	0	0	0	0	0	0	0	0	0	0	0	0	0	0	0	0	0	0	0	0	0	0	0	0	0	0	0	0	0	0	0	0
9771673	0	0	0	0	0	0	0	0	0	0	0	0	0	0	0	0	0	0	0	0	0	0	0	0	0	0	0	0	0	0	0	0	0	0	0	0	0	0	0	0	0	0	0	0	0	0	0	0	0
1019967788	0	0	0	0	0	0	0	0	0	0	0	0	0	0	0	0	0	0	0	0	0	0	0	0	0	0	0	0	0	0	0	0	0	0	0	0	0	0	0	0	0	0	0	0	0	0	0	0	0
1022230872	0	0	0	0	0	0	0	0	0	0	0	0	0	0	0	0	0	0	0	0	0	0	0	0	0	0	0	0	0	0	0	0	0	0	0	0	0	0	0	0	0	0	0	0	0	0	0	0	0
1022141682	0	0	0	0	0	0	0	0	0	0	0	0	0	0	0	0	0	0	0	0	0	0	0	0	0	0	0	0	0	0	0	0	0	0	0	0	0	0	0	0	0	0	0	0	0	0	0	0	0
12391834	0	0	0	0	0	0	0	0	0	0	0	0	0	0	0	0	0	0	0	0	0	0	0	0	0	0	0	0	0	0	0	0	0	0	0	0	0	0	0	0	0	0	0	0	0	0	0	0	0
1020315971	0	0	0	0	0	0	0	0	0	0	0	0	0	0	0	0	0	0	0	0	0	0	0	0	0	0	0	0	0	0	0	0	0	0	0	0	0	0	0	0	0	0	0	0	0	0	0	0	0
1020592934	0	0	0	0	0	0	0	0	0	0	0	0	0	0	0	0	0	0	0	0	0	0	0	0	0	0	0	0	0	0	0	0	0	0	0	0	0	0	0	0	0	0	0	0	0	0	0	0	0
1021496961	0	0	0	0	0	0	0	0	0	0	0	0	0	0	0	0	0	0	0	0	0	0	0	0	0	0	0	0	0	0	0	0	0	0	0	0	0	0	0	0	0	0	0	0	0	0	0	0	0
1018877093	0	0	0	0	0	0	0	0	0	0	0	0	0	0	0	0	0	0	0	0	0	0	0	0	0	0	0	0	0	0	0	0	0	0	0	0	0	0	0	0	0	0	0	0	0	0	0	0	0
1021208408	0	0	0	0	0	0	0	0	0	0	0	0	0	0	0	0	0	0	0	0	0	0	0	0	0	0	0	0	0	0	0	0	0	0	0	0	0	0	0	0	0	0	0	0	0	0	0	0	0
1021574815	0	0	0	0	0	0	0	0	0	0	0	0	0	0	0	0	0	0	0	0	0	0	0	0	0	0	0	0	0	0	0	0	0	0	0	0	0	0	0	0	0	0	0	0	0	0	0	0	0
1021587149	0	0	0	0	0	0	0	0	0	0	0	0	0	0	0	0	0	0	0	0	0	0	0	0	0	0	0	0	0	0	0	0	0	0	0	0	0	0	0	0	0	0	0	0	0	0	0	0	0
1021589514	0	0	0	0	0	0	0	0	0	0	0	0	0	0	0	0	0	0	0	0	0	0	0	0	0	0	0	0	0	0	0	0	0	0	0	0	0	0	0	0	0	0	0	0	0	0	0	0	0
1021858841	0	0	0	0	0	0	0	0	0	0	0	0	0	0	0	0	0	0	0	0	0	0	0	0	0	0	0	0	0	0	0	0	0	0	0	0	0	0	0	0	0	0	0	0	0	0	0	0	0
1021982148	0	0	0	0	0	0	0	0	0	0	0	0	0	0	0	0	0	0	0	0	0	0	0	0	0	0	0	0	0	0	0	0	0	0	0	0	0	0	0	0	0	0	0	0	0	0	0	0	0
1015084525	0	0	0	0	0	0	0	0	0	0	0	0	0	0	0	0	0	0	0	0	0	0	0	0	0	0	0	0	0	0	0	0	0	0	0	0	0	0	0	0	0	0	0	0	0	0	0	0	0
1018463934	0	0	0	0	0	0	0	0	0	0	0	0	0	0	0	0	0	0	0	0	0	0	0	0	0	0	0	0	0	0	0	0	0	0	0	0	0	0	0	0	0	0	0	0	0	0	0	0	0
1019549024	0	0	0	0	0	0	0	0	0	0	0	0	0	0	0	0	0	0	0	0	0	0	0	0	0	0	0	0	0	0	0	0	0	0	0	0	0	0	0	0	0	0	0	0	0	0	0	0	0
2329403	0	0	0	0	0	0	0	0	0	0	0	0	0	0	0	0	0	0	0	0	0	0	0	0	0	0	0	0	0	0	0	0	0	0	0	0	0	0	0	0	0	0	0	0	0	0	0	0	0
1020280223	0	0	0	0	0	0	0	0	0	0	0	0	0	0	0	0	0	0	0	0	0	0	0	0	0	0	0	0	0	0	0	0	0	0	0	0	0	0	0	0	0	0	0	0	0	0	0	0	0
1020846869	0	0	0	0	0	0	0	0	0	0	0	0	0	0	0	0	0	0	0	0	0	0	0	0	0	0	0	0	0	0	0	0	0	0	0	0	0	0	0	0	0	0	0	0	0	0	0	0	0
1020978391	0	0	0	0	0	0	0	0	0	0	0	0	0	0	0	0	0	0	0	0	0	0	0	0	0	0	0	0	0	0	0	0	0	0	0	0	0	0	0	0	0	0	0	0	0	0	0	0	0
1019067351	0	0	0	0	0	0	0	0	0	0	0	0	0	0	0	0	0	0	0	0	0	0	0	0	0	0	0	0	0	0	0	0	0	0	0	0	0	0	0	0	0	0	0	0	0	0	0	0	0
1020582997	0	0	0	0	0	0	0	0	0	0	0	0	0	0	0	0	0	0	0	0	0	0	0	0	0	0	0	0	0	0	0	0	0	0	0	0	0	0	0	0	0	0	0	0	0	0	0	0	0
1021415560	0	0	0	0	0	0	0	0	0	0	0	0	0	0	0	0	0	0	0	0	0	0	0	0	0	0	0	0	0	0	0	0	0	0	0	0	0	0	0	0	0	0	0	0	0	0	0	0	0
1021709681	0	0	0	0	0	0	0	0	0	0	0	0	0	0	0	0	0	0	0	0	0	0	0	0	0	0	0	0	0	0	0	0	0	0	0	0	0	0	0	0	0	0	0	0	0	0	0	0	0
1022309442	0	0	0	0	0	0	0	0	0	0	0	0	0	0	0	0	0	0	0	0	0	0	0	0	0	0	0	0	0	0	0	0	0	0	0	0	0	0	0	0	0	0	0	0	0	0	0	0	0
1020495876	0	0	0	0	0	0	0	0	0	0	0	0	0	0	0	0	0	0	0	0	0	0	0	0	0	0	0	0	0	0	0	0	0	0	0	0	0	0	0	0	0	0	0	0	0	0	0	0	0
1020601347	0	0	0	0	0	0	0	0	0	0	0	0	0	0	0	0	0	0	0	0	0	0	0	0	0	0	0	0	0	0	0	0	0	0	0	0	0	0	0	0	0	0	0	0	0	0	0	0	0
1021795416	0	0	0	0	0	0	0	0	0	0	0	0	0	0	0	0	0	0	0	0	0	0	0	0	0	0	0	0	0	0	0	0	0	0	0	0	0	0	0	0	0	0	0	0	0	0	0	0	0
1022108729	0	0	0	0	0	0	0	0	0	0	0	0	0	0	0	0	0	0	0	0	0	0	0	0	0	0	0	0	0	0	0	0	0	0	0	0	0	0	0	0	0	0	0	0	0	0	0	0	0
2661407	0	0	0	0	0	0	0	0	0	0	0	0	0	0	0	0	0	0	0	0	0	0	0	0	0	0	0	0	0	0	0	0	0	0	0	0	0	0	0	0	0	0	0	0	0	0	0	0	0
1019043061	0	0	0	0	0	0	0	0	0	0	0	0	0	0	0	0	0	0	0	0	0	0	0	0	0	0	0	0	0	0	0	0	0	0	0	0	0	0	0	0	0	0	0	0	0	0	0	0	0
1019565646	0	0	0	0	0	0	0	0	0	0	0	0	0	0	0	0	0	0	0	0	0	0	0	0	0	0	0	0	0	0	0	0	0	0	0	0	0	0	0	0	0	0	0	0	0	0	0	0	0
1021658141	0	0	0	0	0	0	0	0	0	0	0	0	0	0	0	0	0	0	0	0	0	0	0	0	0	0	0	0	0	0	0	0	0	0	0	0	0	0	0	0	0	0	0	0	0	0	0	0	0
1021677596	0	0	0	0	0	0	0	0	0	0	0	0	0	0	0	0	0	0	0	0	0	0	0	0	0	0	0	0	0	0	0	0	0	0	0	0	0	0	0	0	0	0	0	0	0	0	0	0	0
1021756194	0	0	0	0	0	0	0	0	0	0	0	0	0	0	0	0	0	0	0	0	0	0	0	0	0	0	0	0	0	0	0	0	0	0	0	0	0	0	0	0	0	0	0	0	0	0	0	0	0
2519071	0	0	0	0	0	0	0	0	0	0	0	0	0	0	0	0	0	0	0	0	0	0	0	0	0	0	0	0	0	0	0	0	0	0	0	0	0	0	0	0	0	0	0	0	0	0	0	0	0
1019420375	0	0	0	0	0	0	0	0	0	0	0	0	0	0	0	0	0	0	0	0	0	0	0	0	0	0	0	0	0	0	0	0	0	0	0	0	0	0	0	0	0	0	0	0	0	0	0	0	0
7829545	0	0	0	0	0	0	0	0	0	0	0	0	0	0	0	0	0	0	0	0	0	0	0	0	0	0	0	0	0	0	0	0	0	0	0	0	0	0	0	0	0	0	0	0	0	0	0	0	0
1020222824	0	0	0	0	0	0	0	0	0	0	0	0	0	0	0	0	0	0	0	0	0	0	0	0	0	0	0	0	0	0	0	0	0	0	0	0	0	0	0	0	0	0	0	0	0	0	0	0	0
1020493831	0	0	0	0	0	0	0	0	0	0	0	0	0	0	0	0	0	0	0	0	0	0	0	0	0	0	0	0	0	0	0	0	0	0	0	0	0	0	0	0	0	0	0	0	0	0	0	0	0
1020692983	0	0	0	0	0	0	0	0	0	0	0	0	0	0	0	0	0	0	0	0	0	0	0	0	0	0	0	0	0	0	0	0	0	0	0	0	0	0	0	0	0	0	0	0	0	0	0	0	0
1021049693	0	0	0	0	0	0	0	0	0	0	0	0	0	0	0	0	0	0	0	0	0	0	0	0	0	0	0	0	0	0	0	0	0	0	0	0	0	0	0	0	0	0	0	0	0	0	0	0	0
1021906453	0	0	0	0	0	0	0	0	0	0	0	0	0	0	0	0	0	0	0	0	0	0	0	0	0	0	0	0	0	0	0	0	0	0	0	0	0	0	0	0	0	0	0	0	0	0	0	0	0
1020085242	0	0	0	0	0	0	0	0	0	0	0	0	0	0	0	0	0	0	0	0	0	0	0	0	0	0	0	0	0	0	0	0	0	0	0	0	0	0	0	0	0	0	0	0	0	0	0	0	0
1020326189	0	0	0	0	0	0	0	0	0	0	0	0	0	0	0	0	0	0	0	0	0	0	0	0	0	0	0	0	0	0	0	0	0	0	0	0	0	0	0	0	0	0	0	0	0	0	0	0	0
1021531904	0	0	0	0	0	0	0	0	0	0	0	0	0	0	0	0	0	0	0	0	0	0	0	0	0	0	0	0	0	0	0	0	0	0	0	0	0	0	0	0	0	0	0	0	0	0	0	0	0
1018217290	0	0	0	0	0	0	0	0	0	0	0	0	0	0	0	0	0	0	0	0	0	0	0	0	0	0	0	0	0	0	0	0	0	0	0	0	0	0	0	0	0	0	0	0	0	0	0	0	0
1020050360	0	0	0	0	0	0	0	0	0	0	0	0	0	0	0	0	0	0	0	0	0	0	0	0	0	0	0	0	0	0	0	0	0	0	0	0	0	0	0	0	0	0	0	0	0	0	0	0	0
1020548182	0	0	0	0	0	0	0	0	0	0	0	0	0	0	0	0	0	0	0	0	0	0	0	0	0	0	0	0	0	0	0	0	0	0	0	0	0	0	0	0	0	0	0	0	0	0	0	0	0
1020708078	0	0	0	0	0	0	0	0	0	0	0	0	0	0	0	0	0	0	0	0	0	0	0	0	0	0	0	0	0	0	0	0	0	0	0	0	0	0	0	0	0	0	0	0	0	0	0	0	0
1021718817	0	0	0	0	0	0	0	0	0	0	0	0	0	0	0	0	0	0	0	0	0	0	0	0	0	0	0	0	0	0	0	0	0	0	0	0	0	0	0	0	0	0	0	0	0	0	0	0	0
1020971072	0	0	0	0	0	0	0	0	0	0	0	0	0	0	0	0	0	0	0	0	0	0	0	0	0	0	0	0	0	0	0	0	0	0	0	0	0	0	0	0	0	0	0	0	0	0	0	0	0
1021056808	0	0	0	0	0	0	0	0	0	0	0	0	0	0	0	0	0	0	0	0	0	0	0	0	0	0	0	0	0	0	0	0	0	0	0	0	0	0	0	0	0	0	0	0	0	0	0	0	0
1021160596	0	0	0	0	0	0	0	0	0	0	0	0	0	0	0	0	0	0	0	0	0	0	0	0	0	0	0	0	0	0	0	0	0	0	0	0	0	0	0	0	0	0	0	0	0	0	0	0	0
1020146189	0	0	0	0	0	0	0	0	0	0	0	0	0	0	0	0	0	0	0	0	0	0	0	0	0	0	0	0	0	0	0	0	0	0	0	0	0	0	0	0	0	0	0	0	0	0	0	0	0
1020728491	0	0	0	0	0	0	0	0	0	0	0	0	0	0	0	0	0	0	0	0	0	0	0	0	0	0	0	0	0	0	0	0	0	0	0	0	0	0	0	0	0	0	0	0	0	0	0	0	0
1021490625	0	0	0	0	0	0	0	0	0	0	0	0	0	0	0	0	0	0	0	0	0	0	0	0	0	0	0	0	0	0	0	0	0	0	0	0	0	0	0	0	0	0	0	0	0	0	0	0	0
1017318910	0	0	0	0	0	0	0	0	0	0	0	0	0	0	0	0	0	0	0	0	0	0	0	0	0	0	0	0	0	0	0	0	0	0	0	0	0	0	0	0	0	0	0	0	0	0	0	0	0
1020085421	0	0	0	0	0	0	0	0	0	0	0	0	0	0	0	0	0	0	0	0	0	0	0	0	0	0	0	0	0	0	0	0	0	0	0	0	0	0	0	0	0	0	0	0	0	0	0	0	0
1020501510	0	0	0	0	0	0	0	0	0	0	0	0	0	0	0	0	0	0	0	0	0	0	0	0	0	0	0	0	0	0	0	0	0	0	0	0	0	0	0	0	0	0	0	0	0	0	0	0	0
1019404787	0	0	0	0	0	0	0	0	0	0	0	0	0	0	0	0	0	0	0	0	0	0	0	0	0	0	0	0	0	0	0	0	0	0	0	0	0	0	0	0	0	0	0	0	0	0	0	0	0
1021503669	0	0	0	0	0	0	0	0	0	0	0	0	0	0	0	0	0	0	0	0	0	0	0	0	0	0	0	0	0	0	0	0	0	0	0	0	0	0	0	0	0	0	0	0	0	0	0	0	0
1022266666	0	0	0	0	0	0	0	0	0	0	0	0	0	0	0	0	0	0	0	0	0	0	0	0	0	0	0	0	0	0	0	0	0	0	0	0	0	0	0	0	0	0	0	0	0	0	0	0	0
1018515850	0	0	0	0	0	0	0	0	0	0	0	0	0	0	0	0	0	0	0	0	0	0	0	0	0	0	0	0	0	0	0	0	0	0	0	0	0	0	0	0	0	0	0	0	0	0	0	0	0
10845419	0	260000	680000	0	0	0	0	0	0	0	0	0	20000	0	0	0	0	0	0	0	0	0	0	0	0	0	0	0	0	0	0	0	0	0	0	0	0	0	0	0	0	0	0	0	0	0	0	0	0
1014228121	2000000	620000	1980000	460000	240000	1260000	380000	220000	620000	380000	560000	580000	1080000	200000	500000	620000	360000	640000	520000	100000	360000	140000	0	0	0	0	0	0	0	0	0	0	0	0	0	0	0	0	0	0	0	0	0	0	0	0	0	0	0
1029509839	600000	320000	1060000	60000	0	0	0	160000	420000	0	220000	300000	680000	300000	300000	360000	260000	340000	0	0	0	0	0	0	0	0	0	0	0	0	0	0	0	0	0	0	0	0	0	0	0	0	0	0	0	0	0	0	0
1898536	0	0	0	0	0	0	0	0	0	0	0	0	0	0	0	0	0	0	0	0	0	0	0	0	0	0	0	0	0	0	0	0	0	0	0	0	0	0	0	0	0	0	0	0	0	0	0	0	0
1014440019	620000	0	0	0	0	0	0	160000	960000	280000	240000	0	0	280000	20000	580000	240000	480000	0	20000	0	0	0	0	220000	40000	480000	280000	200000	680000	400000	380000	320000	320000	0	1200000	120000	560000	680000	1120000	1060000	480000	900000	520000	1440000	240000	540000	440000	440000
1015059157	20000	200000	500000	200000	60000	40000	100000	140000	480000	200000	200000	40000	140000	160000	20000	340000	260000	240000	400000	140000	340000	480000	400000	400000	120000	280000	360000	20000	140000	340000	320000	280000	160000	260000	500000	820000	0	0	0	0	0	0	0	0	0	0	0	0	0
10647084	680000	400000	1620000	180000	180000	280000	220000	0	80000	120000	0	360000	580000	260000	340000	0	0	0	760000	340000	700000	0	0	0	0	0	0	0	0	0	0	0	0	0	0	0	0	0	0	0	0	0	0	0	0	0	0	0	0
1028369120	0	220000	140000	0	0	0	0	220000	880000	340000	620000	0	0	0	0	760000	520000	620000	1620000	180000	640000	1080000	1380000	800000	380000	400000	600000	120000	0	80000	0	0	280000	0	260000	580000	200000	260000	960000	1340000	1040000	500000	1220000	3760000	2080000	240000	560000	700000	700000
1031583405	0	0	0	0	0	0	0	220000	820000	340000	400000	0	0	0	0	660000	440000	440000	760000	160000	620000	940000	780000	780000	300000	540000	580000	0	0	0	0	0	80000	0	960000	1960000	0	0	0	0	0	0	0	940000	20000	0	0	0	0
6638179	0	320000	1200000	0	0	0	0	0	0	0	480000	0	60000	0	0	740000	500000	480000	800000	180000	620000	640000	720000	0	0	0	0	0	0	0	0	0	0	0	0	0	0	0	0	0	0	0	80000	0	0	0	0	0	0
1022106611	0	0	0	0	0	0	0	0	0	0	0	0	0	0	0	0	0	0	0	0	0	0	0	0	0	0	0	0	0	0	0	0	0	0	0	0	0	0	0	0	0	0	0	0	0	0	0	0	0
1028507555	0	0	0	20000	0	0	0	0	0	20000	340000	0	0	0	0	0	0	300000	0	20000	0	0	0	0	0	20000	0	0	0	0	0	0	0	0	0	0	0	0	0	0	0	0	0	0	0	0	0	0	0
1031278282	0	0	0	0	0	0	0	0	0	60000	0	0	0	0	0	0	0	0	0	140000	180000	0	0	0	0	0	0	0	0	0	0	0	0	0	0	0	0	0	0	0	0	0	0	0	0	0	0	0	0
1018514961	620000	320000	980000	340000	0	20000	40000	200000	680000	340000	380000	280000	480000	300000	300000	700000	620000	440000	760000	180000	680000	940000	760000	760000	220000	480000	460000	60000	0	0	0	0	320000	0	960000	2200000	100000	520000	600000	680000	900000	420000	180000	960000	2080000	320000	440000	520000	140000
1017478417	620000	340000	1000000	300000	0	0	0	0	0	340000	0	280000	480000	300000	320000	0	0	0	0	0	0	0	0	0	0	0	0	0	0	0	0	0	0	0	0	0	0	0	0	0	0	0	0	0	0	0	0	0	0
1029665346	700000	340000	1080000	20000	0	0	0	260000	920000	380000	440000	360000	600000	260000	380000	1040000	540000	460000	1100000	260000	700000	140000	0	0	0	0	0	0	0	0	0	0	0	0	0	0	0	0	0	0	0	0	0	0	0	0	0	0	0
1028364596	1000000	180000	720000	180000	140000	260000	240000	360000	420000	340000	480000	280000	400000	200000	180000	420000	260000	260000	840000	200000	640000	520000	780000	920000	140000	740000	520000	420000	0	580000	160000	20000	380000	240000	1080000	1560000	0	0	0	0	0	0	0	0	0	0	0	0	0
1020494675	60000	2540000	500000	480000	0	0	0	0	0	360000	0	0	180000	940000	820000	0	0	0	0	800000	380000	140000	0	20000	0	120000	0	0	0	0	0	0	140000	0	0	0	0	0	0	0	0	0	0	100000	0	0	0	0	0
1029027456	0	0	0	0	0	0	0	0	0	0	0	0	0	0	0	0	0	0	0	0	0	0	0	0	240000	520000	780000	440000	400000	800000	580000	700000	320000	700000	1340000	1480000	240000	900000	620000	1380000	240000	80000	0	2160000	2720000	700000	1160000	440000	580000
1030177634	720000	600000	1160000	0	0	0	0	300000	100000	100000	0	460000	700000	400000	320000	260000	260000	440000	0	0	0	0	0	0	0	0	0	0	0	0	0	0	0	0	0	0	0	0	0	0	0	0	0	0	0	0	0	0	0
1021565107	0	0	0	0	0	0	0	160000	420000	240000	420000	0	0	0	0	260000	160000	280000	340000	140000	280000	580000	360000	260000	160000	340000	440000	200000	0	120000	0	0	220000	0	680000	1000000	0	0	0	0	0	0	0	0	0	0	0	0	0
1014738932	0	0	0	0	0	0	0	200000	240000	200000	380000	0	0	0	0	460000	500000	320000	800000	180000	640000	920000	660000	780000	200000	500000	800000	300000	0	680000	0	0	280000	400000	1000000	2340000	80000	40000	0	0	0	0	0	840000	680000	0	0	0	0
11438094	660000	480000	1440000	320000	260000	540000	520000	240000	900000	420000	380000	400000	560000	280000	360000	260000	480000	460000	0	0	0	0	0	0	0	0	0	0	0	0	0	0	0	0	0	0	0	0	0	0	0	0	0	0	0	0	0	0	0
1029061935	740000	300000	1080000	360000	320000	420000	0	260000	780000	480000	540000	360000	820000	280000	40000	700000	760000	1460000	0	0	0	0	0	0	260000	20000	660000	0	0	0	0	0	0	0	0	1660000	0	0	0	0	0	0	0	0	0	0	0	0	0
1023406338	0	340000	0	320000	0	0	0	0	0	0	0	0	0	0	340000	0	0	0	0	0	0	0	0	0	0	0	0	0	0	0	0	0	0	0	0	0	0	0	0	0	0	0	0	0	0	0	0	0	0
1027870216	0	0	0	0	120000	460000	360000	120000	20000	280000	0	0	0	0	0	0	20000	0	0	0	0	0	0	0	0	0	0	0	0	0	0	0	0	0	0	0	0	0	0	0	0	0	0	0	0	0	0	0	0
1025069946	0	200000	160000	0	0	0	0	0	160000	160000	0	0	20000	0	260000	0	0	0	0	0	0	0	0	0	0	0	0	0	0	0	0	0	0	0	0	0	0	0	0	0	0	0	0	0	0	0	0	0	0
1028438288	660000	740000	1040000	380000	0	260000	620000	240000	780000	500000	400000	400000	500000	420000	320000	700000	460000	680000	0	0	0	0	0	0	0	0	0	0	0	0	0	0	0	0	0	0	0	0	0	0	0	0	0	0	0	0	0	0	0
11545800	780000	480000	1160000	120000	0	0	0	100000	600000	380000	380000	420000	640000	320000	380000	340000	340000	740000	860000	80000	20000	1340000	0	0	220000	600000	760000	0	0	0	0	0	20000	0	1140000	1520000	0	0	0	0	0	0	0	0	0	0	0	0	0
764754	620000	460000	1100000	260000	240000	0	0	280000	760000	60000	940000	300000	560000	280000	420000	720000	480000	700000	820000	240000	700000	980000	800000	960000	200000	620000	640000	340000	0	220000	0	0	260000	440000	1020000	880000	0	0	0	0	0	0	0	0	0	0	0	0	0
11720057	0	0	0	0	0	0	0	460000	1500000	200000	700000	0	0	0	0	940000	640000	620000	0	0	0	0	0	0	0	0	0	0	0	0	0	0	0	0	0	0	0	0	0	0	0	0	0	0	0	0	0	0	0
1028413673	920000	380000	1580000	340000	0	0	0	340000	1320000	360000	0	380000	640000	400000	360000	840000	0	0	0	0	0	0	0	0	0	0	0	0	0	0	0	0	0	0	0	0	0	0	0	0	0	0	0	0	0	0	0	0	0
1025030877	0	120000	0	60000	0	160000	0	0	0	0	0	0	0	0	60000	0	0	0	0	100000	0	0	0	0	0	0	0	0	0	0	0	0	0	0	0	0	0	0	0	0	0	0	0	0	0	0	0	0	0
1016011599	0	520000	1480000	0	0	0	0	0	0	0	0	0	220000	0	0	0	0	0	0	0	0	0	0	0	0	0	0	0	0	0	0	0	0	0	0	0	0	0	0	0	0	0	0	0	0	0	0	0	0
1027563245	740000	300000	40000	160000	0	0	0	220000	420000	340000	280000	280000	540000	220000	380000	700000	360000	340000	420000	100000	160000	380000	0	0	240000	0	820000	300000	0	680000	360000	0	280000	440000	0	920000	0	0	0	0	0	0	0	0	0	0	0	0	0
1014530739	720000	360000	980000	0	0	0	0	20000	780000	480000	0	700000	780000	380000	40000	340000	0	0	540000	120000	440000	640000	540000	680000	160000	340000	520000	0	0	0	0	0	40000	0	680000	960000	0	0	0	0	0	0	0	0	0	0	0	0	0
1029840425	440000	220000	700000	0	20000	0	0	0	120000	120000	0	220000	240000	140000	60000	0	0	0	0	200000	80000	0	0	0	0	0	0	0	0	0	0	0	0	0	0	0	0	0	0	0	0	0	0	0	0	0	0	0	0
1026735506	660000	300000	760000	200000	180000	280000	240000	160000	680000	480000	340000	280000	340000	280000	260000	540000	300000	320000	0	140000	0	0	0	0	0	0	0	0	0	0	0	0	0	0	0	0	0	0	0	0	0	0	0	0	0	0	0	0	0
1024184904	360000	260000	640000	260000	500000	1000000	620000	40000	840000	520000	0	200000	280000	200000	280000	0	0	0	0	0	0	0	0	0	0	20000	0	0	0	0	0	0	0	0	0	0	0	0	0	0	0	0	0	0	0	0	0	0	0
1029237335	660000	300000	1380000	340000	340000	660000	580000	140000	600000	360000	280000	360000	1000000	300000	340000	820000	420000	540000	740000	180000	680000	980000	820000	840000	200000	480000	680000	360000	240000	820000	540000	500000	280000	460000	1220000	1500000	120000	520000	920000	1540000	1080000	460000	1960000	1000000	1940000	320000	560000	600000	600000
1029297308	620000	200000	1000000	780000	280000	520000	20000	240000	780000	360000	380000	280000	580000	300000	380000	680000	440000	460000	760000	200000	620000	940000	800000	860000	220000	520000	580000	0	0	0	0	0	0	0	1020000	1520000	0	0	0	0	0	0	0	0	0	0	0	0	0
1019655994	0	0	0	0	0	0	0	0	0	0	0	0	0	0	0	0	0	0	0	0	0	0	0	0	0	0	0	0	0	0	0	0	0	0	0	0	0	0	0	0	0	0	0	0	0	0	0	0	0
1024323147	0	0	0	0	0	0	0	0	0	0	0	0	0	0	0	0	0	0	0	0	0	0	0	0	0	0	0	0	0	0	0	0	0	0	0	0	0	0	0	0	0	0	0	0	0	0	0	0	0
1019210421	660000	400000	980000	340000	240000	480000	480000	200000	780000	340000	380000	600000	560000	280000	340000	680000	440000	440000	400000	140000	400000	840000	760000	880000	280000	500000	720000	300000	280000	680000	580000	660000	280000	520000	980000	1460000	160000	520000	600000	980000	980000	440000	1080000	980000	1480000	420000	600000	520000	420000
10634085	0	180000	280000	40000	0	0	0	0	0	0	0	0	0	0	100000	0	0	0	0	40000	0	0	0	0	0	120000	0	0	0	0	0	0	0	0	20000	0	80000	80000	120000	0	0	0	0	520000	820000	100000	80000	0	180000
1028780443	600000	280000	300000	60000	0	0	0	260000	860000	540000	20000	400000	1060000	220000	320000	700000	400000	100000	0	180000	680000	0	320000	900000	240000	600000	900000	420000	280000	860000	580000	600000	340000	720000	1920000	2160000	0	0	0	0	0	0	0	380000	0	0	0	0	0
1025957138	0	220000	0	0	0	0	0	0	0	0	0	0	0	0	0	0	0	0	0	100000	0	0	0	0	0	0	0	0	0	0	0	0	0	0	0	0	0	0	0	0	0	0	0	0	0	0	0	0	0
1023609518	720000	380000	1040000	760000	300000	440000	420000	180000	620000	380000	340000	280000	500000	320000	400000	680000	480000	360000	600000	160000	460000	720000	540000	680000	100000	420000	380000	0	0	0	0	0	0	0	780000	760000	0	0	0	0	0	0	0	0	0	0	0	0	0
1031338246	620000	1140000	1200000	0	20000	0	0	240000	780000	320000	980000	400000	600000	300000	20000	680000	920000	540000	2940000	500000	1700000	2640000	760000	0	440000	0	720000	400000	0	40000	0	0	320000	0	0	2400000	120000	460000	600000	1020000	1220000	580000	1340000	1420000	1420000	340000	780000	560000	460000
1028662420	800000	320000	1260000	400000	0	0	0	260000	1020000	440000	400000	440000	660000	300000	440000	800000	460000	500000	0	100000	0	0	0	0	0	0	0	0	0	0	0	0	0	0	0	0	0	0	0	0	0	0	0	0	0	0	0	0	0
1029581584	500000	380000	1160000	0	0	0	0	320000	820000	360000	760000	320000	480000	0	0	1180000	880000	1040000	760000	160000	620000	800000	860000	800000	0	20000	0	0	0	0	0	0	0	0	0	0	0	0	0	0	0	0	0	0	0	0	0	0	0
2661407	0	80000	0	0	0	0	0	0	0	0	0	0	0	0	0	0	0	0	0	0	0	0	0	0	0	0	0	0	0	0	0	0	0	0	0	0	0	0	0	0	0	0	0	0	0	0	0	0	0
1031192940	0	380000	1000000	0	0	0	0	0	0	540000	0	20000	480000	0	20000	740000	280000	0	0	40000	0	0	0	0	0	0	0	20000	0	0	0	0	480000	0	0	0	0	0	0	0	0	0	0	0	0	0	0	0	0
1031358533	0	0	0	0	0	0	0	220000	780000	400000	460000	0	0	0	0	740000	440000	480000	1160000	140000	640000	980000	840000	1680000	0	0	0	0	260000	500000	640000	560000	0	720000	0	0	120000	480000	840000	1280000	1020000	420000	1300000	1060000	1500000	320000	600000	620000	420000
1031318504	0	0	0	0	0	0	0	140000	420000	440000	0	0	0	0	0	20000	0	460000	0	220000	0	0	0	20000	0	260000	0	0	0	0	0	0	0	0	0	0	0	0	0	0	0	0	0	200000	0	0	0	0	0
4652476	460000	320000	920000	400000	0	0	0	0	0	0	0	280000	480000	260000	500000	0	0	0	0	100000	0	0	0	0	0	0	0	0	0	0	0	0	0	0	0	0	0	0	0	0	0	0	0	0	0	0	0	0	0
1031221529	0	0	0	0	0	0	0	220000	440000	440000	0	0	0	0	0	360000	120000	440000	520000	200000	580000	860000	40000	0	0	0	0	0	0	0	0	0	0	0	0	0	0	0	0	0	0	0	0	0	0	0	0	0	0
1027825520	0	20000	20000	0	0	0	0	0	0	80000	0	0	0	0	0	0	0	0	0	0	0	0	0	0	0	0	0	0	0	0	0	0	0	0	0	0	0	0	0	0	0	0	0	0	0	0	0	0	0
1029555917	740000	340000	1160000	0	0	0	0	0	0	0	0	360000	460000	300000	60000	0	0	0	760000	180000	960000	920000	780000	800000	240000	500000	660000	300000	260000	680000	560000	520000	260000	440000	960000	1640000	120000	560000	680000	980000	920000	500000	1100000	960000	1400000	720000	840000	560000	420000
1029028426	820000	840000	840000	340000	0	0	0	280000	1040000	560000	820000	300000	540000	320000	360000	760000	780000	780000	1340000	480000	900000	2980000	1920000	1380000	240000	560000	860000	460000	0	860000	0	0	400000	440000	1680000	1660000	120000	560000	460000	0	2060000	580000	1180000	1060000	1580000	300000	580000	0	420000
1021774828	0	280000	60000	0	0	0	0	0	0	0	0	0	180000	0	0	0	0	0	120000	60000	0	0	40000	120000	0	0	0	0	0	0	0	0	0	0	0	0	0	0	0	0	0	0	0	0	0	0	0	0	0
1015975408	620000	320000	0	400000	260000	500000	40000	280000	860000	380000	380000	0	0	340000	400000	720000	460000	480000	780000	180000	640000	980000	760000	1020000	20000	500000	640000	380000	0	820000	0	0	340000	440000	1000000	940000	0	0	0	0	0	0	0	0	0	0	0	0	0
1029873240	460000	500000	1180000	500000	120000	280000	240000	120000	420000	200000	220000	300000	260000	140000	520000	380000	240000	360000	460000	240000	580000	580000	540000	500000	320000	680000	920000	240000	0	280000	20000	0	160000	240000	1420000	2340000	0	0	0	0	0	0	0	0	0	0	0	0	0
1029034843	280000	120000	460000	80000	20000	0	0	260000	700000	400000	460000	160000	240000	100000	440000	660000	340000	60000	760000	220000	680000	940000	600000	680000	200000	420000	600000	340000	240000	840000	420000	560000	300000	460000	800000	1240000	0	0	0	0	0	0	0	0	0	0	0	0	0
1017211908	0	60000	0	0	0	0	0	0	0	0	0	0	0	0	0	0	0	0	0	0	0	0	0	0	0	0	0	0	0	0	0	0	0	0	0	0	0	0	0	0	0	0	0	0	0	0	0	0	0
1017764590	660000	320000	1000000	0	0	0	0	340000	1080000	780000	780000	300000	500000	340000	0	960000	540000	620000	980000	180000	680000	1300000	1120000	1160000	280000	720000	920000	880000	260000	640000	580000	520000	700000	460000	1360000	2140000	120000	480000	860000	1820000	1120000	540000	760000	1040000	1540000	700000	820000	720000	680000
1030718248	780000	420000	1600000	100000	0	0	0	280000	280000	400000	0	320000	540000	360000	360000	300000	0	0	440000	100000	860000	500000	860000	700000	440000	380000	940000	340000	0	220000	0	0	380000	0	500000	2000000	0	0	0	0	0	0	0	0	0	0	0	0	0
5320705	0	240000	540000	0	0	0	0	0	0	0	0	0	0	0	0	0	0	0	0	40000	0	0	0	0	0	0	0	0	0	0	0	0	0	0	0	0	0	0	0	0	0	0	0	0	0	0	0	0	0
1019896754	620000	0	0	340000	60000	540000	340000	160000	640000	340000	260000	300000	0	300000	360000	620000	400000	160000	420000	80000	420000	740000	620000	480000	200000	60000	600000	240000	140000	480000	280000	320000	260000	380000	880000	780000	120000	540000	600000	980000	880000	460000	1080000	0	260000	300000	580000	540000	400000
12821616	540000	540000	920000	500000	200000	500000	240000	160000	580000	340000	240000	240000	420000	220000	320000	540000	260000	280000	620000	160000	440000	740000	640000	760000	140000	320000	380000	0	0	0	0	0	0	0	640000	940000	0	0	0	0	0	0	0	0	0	0	0	0	0
1014570827	660000	340000	1060000	300000	0	0	0	240000	780000	380000	500000	480000	840000	340000	360000	700000	460000	440000	2020000	460000	1720000	3260000	1500000	1360000	140000	720000	620000	0	0	0	0	0	0	0	500000	1380000	0	0	0	0	0	0	0	940000	20000	0	0	0	0
1018883901	640000	500000	640000	260000	240000	400000	340000	260000	680000	280000	380000	480000	460000	220000	220000	560000	380000	440000	680000	160000	520000	920000	760000	800000	260000	480000	760000	580000	380000	780000	600000	680000	300000	520000	1140000	1580000	100000	640000	660000	1000000	880000	460000	1140000	2280000	1440000	260000	560000	500000	420000
1028807513	640000	320000	980000	320000	20000	0	0	240000	780000	380000	380000	180000	500000	300000	360000	680000	460000	440000	640000	160000	620000	0	0	0	0	460000	0	300000	260000	1580000	560000	1060000	360000	500000	940000	640000	0	0	0	0	0	0	0	960000	180000	20000	0	0	0
1016251186	0	20000	660000	0	0	0	0	0	0	0	0	0	0	0	0	0	0	0	0	0	0	0	0	0	0	0	0	0	0	0	0	0	0	0	0	0	0	0	0	0	0	0	0	0	0	0	0	0	0
1016515071	0	0	0	0	0	0	0	0	0	0	0	0	0	0	0	0	0	0	0	20000	0	0	0	0	260000	380000	20000	0	0	0	0	0	0	0	680000	1100000	20000	0	40000	280000	0	0	860000	900000	40000	20000	20000	0	0
1017594800	620000	320000	1000000	0	240000	260000	0	220000	820000	360000	480000	280000	580000	300000	40000	860000	480000	460000	840000	200000	660000	980000	780000	660000	240000	500000	880000	300000	260000	700000	580000	500000	280000	500000	1020000	1440000	80000	280000	440000	0	0	40000	0	960000	940000	300000	640000	0	400000
1023899412	580000	360000	1000000	220000	0	0	0	260000	520000	260000	340000	240000	340000	240000	300000	460000	280000	160000	440000	160000	320000	620000	620000	0	0	0	0	0	0	0	0	0	0	0	0	0	0	0	0	0	0	0	0	0	0	0	0	0	0
1021217014	0	380000	980000	0	0	0	0	80000	320000	300000	260000	20000	180000	0	40000	480000	320000	260000	760000	260000	620000	940000	780000	820000	20000	340000	80000	240000	0	20000	0	0	160000	0	140000	0	100000	240000	320000	700000	1000000	640000	720000	940000	1280000	220000	440000	460000	280000
1031231499	0	120000	20000	0	0	0	0	20000	0	60000	0	0	0	0	0	0	0	300000	0	220000	440000	0	0	0	0	0	0	0	0	0	0	0	0	0	0	0	0	0	0	0	0	0	0	0	0	0	0	0	0
1021876013	0	0	0	0	0	0	0	0	0	40000	280000	0	0	0	0	20000	420000	300000	400000	160000	440000	500000	440000	880000	220000	440000	580000	560000	0	600000	280000	0	220000	600000	760000	1260000	0	0	0	0	0	0	0	0	0	0	0	0	0
1027501171	600000	380000	1000000	300000	240000	500000	480000	240000	780000	360000	380000	280000	500000	300000	340000	660000	440000	480000	820000	180000	640000	920000	780000	20000	0	0	0	0	0	0	0	0	0	0	0	0	0	0	0	0	0	0	0	0	0	0	0	0	0
8162248	0	0	0	0	0	0	0	0	0	0	0	0	0	0	0	0	0	0	20000	180000	440000	940000	300000	0	460000	500000	640000	480000	520000	700000	760000	1040000	560000	460000	1120000	2880000	0	0	600000	600000	0	0	0	420000	0	0	340000	0	380000
8349276	0	0	0	0	20000	0	80000	20000	0	20000	0	0	0	0	80000	60000	0	280000	20000	40000	20000	140000	20000	0	0	0	0	0	0	0	0	0	0	0	0	0	0	0	0	0	0	0	0	80000	40000	0	0	0	0
1022342649	1100000	2240000	2460000	460000	20000	520000	820000	0	720000	1200000	2100000	2160000	320000	700000	740000	0	0	600000	0	580000	1460000	2340000	0	0	0	0	0	0	0	0	0	0	0	0	0	0	20000	0	0	0	0	0	0	0	80000	0	0	0	0
9541192	620000	160000	980000	200000	0	0	0	0	0	0	0	280000	460000	220000	380000	0	0	0	1300000	260000	1420000	940000	380000	0	0	0	0	0	0	0	0	0	0	0	0	0	0	0	0	0	0	0	0	0	0	0	0	0	0
9475985	0	940000	1060000	0	0	0	0	0	0	0	0	0	0	0	0	0	0	0	0	0	0	0	0	0	0	0	0	0	0	0	0	0	0	0	0	0	0	0	0	0	0	0	0	0	0	0	0	0	0
1029435720	1100000	400000	1060000	440000	220000	0	0	160000	520000	0	220000	300000	440000	300000	520000	560000	300000	240000	620000	200000	360000	880000	520000	480000	280000	240000	580000	380000	240000	640000	400000	340000	240000	340000	900000	1520000	80000	260000	480000	840000	540000	300000	540000	700000	1480000	20000	500000	540000	280000
1027328729	280000	340000	620000	60000	0	0	0	200000	780000	140000	320000	140000	260000	180000	180000	560000	360000	340000	680000	180000	500000	660000	520000	540000	160000	380000	440000	220000	180000	560000	520000	440000	220000	520000	660000	1120000	100000	420000	0	0	0	0	0	780000	1140000	0	0	0	0
1031192956	1000000	520000	1080000	480000	0	0	0	120000	960000	1080000	320000	420000	740000	440000	380000	460000	340000	440000	780000	200000	420000	760000	540000	660000	400000	380000	780000	840000	460000	860000	420000	160000	180000	1020000	580000	2380000	80000	280000	520000	1460000	260000	180000	1500000	1040000	1460000	220000	380000	360000	220000
1021659852	620000	320000	1000000	340000	260000	340000	40000	220000	780000	360000	380000	280000	480000	280000	320000	740000	460000	440000	0	0	0	0	0	0	0	0	0	0	0	0	0	0	0	0	0	0	0	0	0	0	0	0	0	0	0	0	0	0	0
1018609060	0	280000	400000	0	0	0	0	260000	600000	260000	320000	0	0	0	0	480000	360000	280000	480000	160000	340000	540000	560000	340000	0	0	0	0	0	0	0	0	0	0	0	0	0	0	0	0	0	0	0	0	0	0	0	0	0
1019020655	100000	160000	540000	20000	0	0	0	120000	400000	140000	220000	140000	240000	80000	200000	200000	200000	180000	0	20000	0	0	0	0	0	0	0	0	0	0	0	0	0	0	0	0	0	0	0	0	0	0	0	0	0	0	0	0	0
1030425563	0	0	0	0	0	0	0	0	0	340000	0	0	0	0	0	0	0	0	0	100000	0	0	0	0	0	0	0	0	0	0	0	0	220000	0	0	0	0	0	0	20000	0	0	0	20000	40000	280000	0	0	0
1029877470	0	0	0	0	0	0	0	1020000	3080000	1360000	420000	0	0	0	0	1520000	800000	420000	2100000	740000	2400000	1580000	2180000	1240000	500000	2000000	680000	420000	0	880000	0	0	520000	480000	2380000	3640000	140000	640000	0	0	0	0	0	1900000	1400000	0	0	0	0
1017546511	620000	340000	980000	320000	0	0	0	0	0	20000	0	340000	500000	300000	380000	0	0	0	0	0	0	0	0	0	0	0	0	0	0	0	0	0	0	0	0	0	0	0	0	0	0	0	0	0	0	0	0	0	0
1031128485	0	0	0	0	0	0	0	300000	380000	220000	320000	0	0	0	0	420000	220000	300000	740000	100000	480000	1240000	1220000	500000	380000	200000	280000	440000	0	1500000	0	0	340000	260000	840000	1820000	0	0	460000	900000	840000	520000	0	660000	880000	60000	20000	320000	0
1026505435	40000	140000	40000	40000	0	20000	0	0	0	40000	0	40000	80000	20000	60000	0	0	0	100000	60000	20000	40000	20000	0	0	20000	0	20000	20000	0	0	20000	0	0	20000	0	0	480000	0	0	0	20000	0	0	0	40000	20000	0	0
1027289398	240000	620000	1640000	0	0	0	0	180000	620000	140000	780000	160000	980000	100000	0	740000	500000	420000	780000	180000	620000	840000	900000	800000	280000	540000	680000	1500000	340000	2100000	1940000	960000	520000	980000	780000	1680000	220000	520000	1420000	1560000	780000	240000	1320000	1160000	2380000	100000	800000	1160000	800000
1015034933	720000	460000	980000	380000	120000	0	0	240000	760000	320000	380000	340000	480000	20000	460000	1300000	620000	820000	780000	200000	680000	1060000	840000	860000	380000	480000	740000	300000	260000	720000	580000	520000	380000	440000	1040000	1480000	100000	860000	620000	1000000	880000	480000	1080000	940000	1500000	380000	820000	660000	500000
1030677610	540000	80000	0	100000	0	0	0	360000	420000	260000	580000	0	0	240000	340000	640000	400000	580000	540000	40000	200000	940000	420000	580000	0	280000	40000	280000	280000	840000	480000	460000	200000	820000	240000	0	140000	480000	0	0	0	0	0	400000	1360000	0	0	0	0
1024565211	0	0	0	0	0	0	0	0	0	0	0	0	0	0	0	0	0	0	0	0	0	0	0	0	0	0	0	0	0	0	0	0	0	0	0	0	0	0	0	0	0	0	0	0	0	0	0	0	0
1025953455	0	0	0	0	0	0	0	400000	200000	0	780000	0	0	0	0	980000	820000	960000	0	0	0	0	0	0	0	0	0	0	0	0	0	0	0	0	0	0	0	0	0	0	0	0	0	0	0	0	0	0	0
1021966200	400000	300000	660000	220000	200000	360000	320000	160000	580000	240000	300000	200000	340000	200000	220000	480000	320000	300000	0	240000	80000	0	0	0	180000	340000	620000	220000	0	560000	180000	0	240000	320000	680000	1480000	120000	520000	860000	820000	720000	420000	1000000	760000	1520000	280000	460000	460000	420000
1031480941	660000	320000	1100000	440000	260000	960000	200000	220000	840000	420000	380000	280000	480000	280000	400000	700000	320000	440000	780000	240000	740000	920000	260000	120000	220000	480000	640000	280000	20000	640000	540000	0	280000	420000	1020000	1640000	0	0	0	0	0	0	0	0	0	0	0	0	0
1021748833	0	0	0	0	0	0	0	0	0	0	0	0	0	0	20000	0	0	0	0	120000	0	0	0	0	0	480000	0	0	0	0	0	0	0	0	2100000	20000	0	0	0	0	0	0	0	0	0	0	0	0	0
1029407774	660000	440000	880000	20000	0	0	0	0	0	20000	200000	280000	480000	320000	360000	100000	220000	340000	780000	220000	660000	940000	760000	800000	360000	680000	860000	420000	180000	700000	380000	360000	340000	300000	1080000	1480000	0	0	20000	60000	600000	340000	720000	0	0	40000	0	340000	0
1029077290	0	320000	580000	0	0	0	0	220000	780000	360000	380000	0	0	0	0	680000	440000	420000	520000	200000	640000	0	0	0	0	0	0	0	0	0	0	0	0	0	0	0	0	0	0	0	0	0	0	0	0	0	0	0	0
5461915	0	0	0	80000	0	0	0	0	0	0	0	0	0	0	20000	0	0	0	0	0	0	0	0	0	0	0	0	0	0	0	0	0	0	0	0	0	0	0	0	0	0	0	0	0	0	0	0	0	0
1218065	0	20000	0	40000	60000	80000	20000	60000	100000	140000	420000	0	0	0	80000	60000	80000	100000	0	40000	0	0	0	0	0	0	0	0	0	0	0	0	0	0	0	0	0	0	0	0	0	0	0	0	0	0	0	0	0
1015132646	340000	300000	940000	200000	0	0	0	340000	680000	540000	580000	180000	520000	80000	220000	560000	680000	340000	420000	320000	500000	680000	660000	600000	560000	440000	1240000	480000	0	660000	80000	0	380000	500000	800000	1300000	0	0	0	0	0	0	0	0	0	0	0	0	0
1020501739	0	20000	0	0	0	0	0	220000	620000	180000	380000	0	0	0	0	700000	80000	460000	760000	120000	340000	1140000	720000	1180000	100000	300000	560000	340000	0	880000	0	0	300000	520000	300000	940000	60000	180000	620000	1140000	680000	480000	1020000	900000	880000	340000	700000	500000	400000
2531137	720000	360000	980000	260000	0	0	0	220000	640000	300000	480000	300000	520000	280000	340000	660000	280000	480000	760000	120000	620000	460000	80000	820000	0	100000	0	340000	240000	860000	540000	460000	260000	460000	0	0	0	0	0	0	0	0	0	740000	80000	0	0	0	0
11561804	0	180000	560000	360000	260000	340000	340000	0	140000	240000	280000	0	0	0	60000	0	220000	320000	60000	140000	400000	0	0	0	0	0	0	0	0	0	0	0	0	0	0	0	0	0	0	0	0	0	0	0	0	0	0	0	0
1031016781	0	0	0	0	0	0	0	140000	640000	320000	260000	0	0	0	0	480000	20000	380000	80000	160000	220000	0	0	0	0	300000	0	0	0	0	0	0	0	0	140000	0	0	0	0	0	0	20000	740000	0	0	0	0	0	0
1031442038	640000	380000	1900000	0	0	0	0	120000	160000	320000	60000	280000	540000	300000	20000	200000	140000	340000	0	0	0	0	0	0	0	0	0	0	0	0	0	0	0	0	0	0	140000	380000	0	0	0	0	0	380000	840000	160000	0	0	0
1031221404	480000	340000	940000	320000	0	0	0	160000	520000	280000	400000	400000	860000	200000	240000	420000	660000	300000	0	0	0	0	0	0	0	0	0	0	0	0	0	0	0	0	0	0	0	0	0	0	0	0	0	0	0	0	0	0	0
1029773360	0	500000	720000	0	0	0	0	0	0	0	0	40000	80000	0	20000	0	0	0	0	0	0	0	0	0	0	80000	0	0	0	0	0	0	40000	0	0	0	0	0	0	0	0	0	0	0	0	0	0	0	0
1029049652	360000	380000	820000	0	0	0	0	0	0	0	0	200000	320000	0	0	0	0	0	0	0	0	0	0	0	0	0	0	0	0	0	0	0	0	0	0	0	0	0	0	0	0	0	0	0	0	0	0	0	0
1026293508	0	0	0	0	0	0	0	0	0	0	0	0	0	0	0	0	0	0	0	80000	0	0	0	0	0	0	0	0	0	0	0	0	0	0	0	0	0	0	0	0	0	0	0	0	0	0	0	0	0
1015626586	620000	400000	1000000	20000	0	0	0	220000	800000	340000	440000	280000	520000	280000	320000	740000	500000	440000	740000	180000	680000	760000	760000	840000	240000	0	820000	320000	240000	700000	560000	540000	220000	280000	0	1480000	140000	640000	560000	1020000	940000	460000	1220000	980000	1480000	320000	580000	560000	440000
1025795786	0	100000	20000	0	0	0	0	0	0	0	0	0	0	0	0	0	0	0	0	0	0	0	0	0	0	0	0	0	0	0	0	0	0	0	0	0	0	0	0	0	0	0	0	0	0	0	0	0	0
9256718	740000	600000	1760000	460000	280000	420000	400000	260000	680000	480000	340000	480000	1180000	460000	360000	820000	600000	440000	0	0	0	0	0	0	0	0	0	0	0	0	0	0	0	0	0	0	0	0	0	0	0	0	0	0	0	0	0	0	0
1015784190	420000	200000	520000	220000	180000	100000	40000	140000	360000	120000	260000	200000	440000	200000	180000	400000	180000	340000	500000	120000	420000	620000	520000	160000	100000	0	440000	220000	180000	780000	400000	360000	220000	300000	540000	900000	100000	400000	0	0	0	0	0	740000	920000	0	0	0	0
9423356	520000	380000	1060000	200000	0	0	0	280000	420000	300000	580000	540000	380000	240000	260000	540000	440000	580000	280000	260000	860000	0	0	0	0	0	0	0	0	0	0	0	0	0	0	0	0	0	0	0	0	0	0	0	0	0	0	0	0
1021047104	0	20000	120000	0	0	0	0	0	0	0	0	0	0	0	0	0	0	0	0	0	0	560000	0	80000	100000	80000	380000	0	0	0	0	0	0	0	0	1100000	0	0	480000	0	0	0	0	0	20000	0	20000	0	0
1021216357	0	80000	20000	0	0	0	0	0	0	0	0	0	0	0	40000	0	0	0	0	0	0	0	0	0	0	0	0	0	0	0	0	0	0	0	0	0	0	0	0	0	0	0	0	0	0	0	0	0	0
1015589818	0	0	0	0	0	0	0	0	0	0	0	0	0	0	60000	0	0	0	0	0	0	0	0	0	0	0	0	0	0	0	0	0	0	0	0	0	0	0	0	0	0	0	0	0	0	0	0	0	0
1028583876	0	0	0	220000	160000	220000	240000	160000	420000	120000	140000	0	0	0	200000	380000	240000	260000	420000	140000	360000	520000	500000	480000	160000	300000	380000	220000	160000	420000	360000	320000	120000	260000	460000	840000	160000	620000	720000	940000	980000	500000	1140000	1140000	1660000	400000	740000	760000	520000
1029073556	620000	320000	1360000	540000	240000	540000	460000	260000	80000	380000	120000	300000	480000	280000	360000	280000	60000	80000	0	0	0	0	0	0	0	0	0	0	0	0	0	0	0	0	0	0	0	0	0	0	0	0	0	0	0	0	0	0	0
1015973831	0	20000	0	0	0	0	0	360000	660000	100000	560000	0	0	0	0	960000	340000	1060000	0	0	0	0	0	0	0	0	0	0	0	0	0	0	0	0	0	0	0	0	0	0	0	0	0	0	0	0	0	0	0
1027678627	0	20000	0	0	0	0	0	0	0	0	0	0	0	0	0	0	0	0	0	0	0	0	0	0	0	0	0	0	0	0	0	0	0	0	0	0	0	0	0	0	0	0	0	0	0	0	0	0	0
1030783439	0	80000	0	0	0	0	0	0	0	0	0	0	0	0	0	0	0	0	0	0	0	0	0	0	0	0	0	0	0	0	0	0	0	0	0	0	0	0	0	0	0	0	0	40000	0	0	0	0	0
1027375973	0	0	0	0	0	0	0	180000	540000	380000	340000	0	0	0	0	500000	320000	260000	620000	180000	440000	860000	620000	440000	120000	260000	320000	0	0	0	0	0	120000	0	620000	760000	0	0	0	0	0	0	0	0	0	0	0	0	0
1031222328	0	0	0	0	0	0	0	160000	340000	400000	280000	0	0	0	0	460000	260000	600000	0	160000	160000	0	0	0	0	0	0	0	0	0	0	0	0	0	0	0	0	0	0	0	0	0	0	0	0	0	0	0	0
10206904	0	0	0	0	0	0	0	0	0	0	0	0	0	0	0	0	0	0	0	140000	40000	0	0	0	0	0	0	0	0	0	0	0	0	0	0	0	0	0	0	0	0	0	0	0	0	0	0	0	0
1029880222	500000	200000	480000	40000	0	0	0	240000	1180000	340000	380000	140000	140000	280000	340000	620000	520000	440000	760000	220000	620000	1000000	760000	820000	20000	560000	640000	0	0	0	0	0	220000	0	940000	1480000	120000	20000	0	0	0	0	0	0	740000	100000	0	0	0
1029804574	0	0	0	0	0	0	0	0	0	0	0	0	0	0	0	0	0	0	0	120000	120000	0	0	0	0	0	0	0	0	0	0	0	0	0	0	0	0	0	0	0	0	0	0	0	0	0	0	0	0
11429617	600000	320000	1020000	0	0	0	0	240000	520000	0	760000	260000	480000	280000	60000	920000	480000	640000	860000	0	340000	1180000	1080000	20000	0	0	0	0	0	0	0	0	0	0	0	0	0	0	0	0	0	0	0	0	0	0	0	0	0
1029905559	600000	600000	1100000	500000	200000	400000	320000	160000	620000	280000	380000	180000	580000	320000	320000	480000	320000	380000	960000	300000	840000	920000	820000	1220000	220000	660000	780000	320000	260000	900000	580000	520000	580000	520000	1200000	1420000	100000	820000	760000	1160000	560000	400000	1180000	1000000	1640000	360000	540000	560000	340000
1031195463	540000	320000	1040000	220000	180000	500000	120000	200000	680000	320000	300000	360000	460000	220000	240000	440000	300000	360000	0	120000	200000	0	0	0	180000	400000	460000	220000	0	660000	0	0	200000	160000	900000	1240000	0	0	0	0	0	0	0	0	0	0	0	0	0
1029269628	360000	0	0	0	0	0	0	280000	840000	360000	520000	0	0	340000	0	980000	520000	560000	0	100000	0	0	0	0	0	0	0	520000	260000	2000000	580000	580000	260000	880000	0	100000	120000	500000	640000	1120000	640000	440000	0	1000000	1800000	480000	500000	440000	400000
3539753	0	0	0	0	0	0	0	0	0	0	420000	0	0	0	0	0	0	640000	0	60000	0	0	0	0	480000	580000	1600000	440000	320000	1440000	840000	800000	60000	1260000	1360000	3160000	260000	1280000	1380000	1780000	2700000	500000	2640000	2180000	3360000	320000	640000	1060000	440000
1016270862	0	160000	0	340000	0	0	0	200000	180000	360000	820000	0	0	0	380000	760000	700000	480000	760000	180000	700000	940000	640000	860000	0	520000	0	0	0	0	0	0	0	0	880000	0	0	0	0	0	0	0	0	0	0	0	0	0	0
1028573687	660000	320000	1020000	0	0	0	0	320000	0	20000	440000	280000	520000	160000	0	780000	480000	540000	0	0	0	0	0	0	0	0	0	0	0	0	0	0	0	0	0	0	0	0	0	0	0	0	0	0	0	0	0	0	0
2403093	40000	80000	60000	120000	60000	40000	20000	40000	40000	80000	20000	60000	80000	40000	320000	40000	40000	0	0	0	0	0	0	0	0	0	0	0	0	0	0	0	0	0	0	0	0	0	0	0	0	0	0	0	0	0	0	0	0
1030411610	0	600000	560000	0	0	0	0	220000	940000	500000	0	0	0	0	0	240000	0	0	0	0	0	0	0	0	0	0	0	0	0	0	0	0	0	0	0	0	280000	140000	0	0	0	0	0	1000000	1780000	0	0	0	0
1016011126	0	20000	0	0	0	0	0	0	0	0	0	0	0	0	120000	0	0	0	0	0	0	0	0	0	0	0	0	0	0	0	0	0	0	0	0	0	0	0	0	0	0	0	0	0	0	0	0	0	0
[truncated: 2,808 more rows]
[truncated: 80 more columns]
