# Supplementary material for: A MOOC Video Viewing Behavior Analysis Algorithm
Source: Hindawi journal article supplement (doi:10.1155/2018/7560805), 2018-10-16
Supplement: f1 [file 7560805.f1.zip › First Aid Knowledge.xlsx]

## Sheet: information_1002251001
标号	1	2	3	4	5	6	7	8	9	10	11	12	13	14	15	16	17	18	19
视频ID	969069	975070	1029001	1029002	1043028	1044025	1052106	1071003	1080005	1112003	1117001	1118002	1126047	1130039	1154025	1156022	1168049	1168050	1004127235
视频时长	613000	622000	447000	876000	1005000	497000	547000	428000	560000	651000	516000	800000	598000	561000	602000	441000	604000	582000	551000
2434040	400000	420000	300000	980000	0	0	0	0	0	0	0	0	0	0	0	0	0	0	220000
1026231790	500000	20000	480000	740000	1260000	540000	620000	540000	600000	760000	560000	1400000	300000	0	0	0	0	0	420000
1414362	480000	480000	440000	620000	720000	400000	440000	360000	620000	420000	360000	380000	440000	500000	0	0	0	0	420000
1032228663	540000	680000	20000	920000	0	0	0	0	0	0	0	0	0	0	0	0	0	0	600000
1017673842	0	540000	180000	0	740000	500000	0	0	0	0	0	0	0	0	0	0	0	0	300000
1032655379	0	0	40000	0	880000	520000	580000	420000	620000	700000	380000	900000	480000	580000	40000	900000	580000	520000	0
1018621745	0	0	500000	1040000	0	180000	0	0	0	0	0	0	0	0	0	0	0	0	480000
1030403143	0	0	300000	900000	880000	420000	0	0	0	0	0	0	0	0	0	0	0	0	340000
1016194056	640000	560000	460000	740000	140000	440000	0	0	0	0	0	0	0	0	0	0	0	0	520000
1031295130	660000	600000	60000	0	440000	240000	520000	500000	580000	680000	0	880000	600000	580000	500000	460000	520000	360000	120000
1021374131	720000	680000	500000	1020000	0	0	0	0	0	0	0	0	0	0	0	0	0	0	600000
10841289	440000	440000	340000	700000	0	0	0	0	0	0	0	0	0	0	0	0	0	0	500000
1032264513	0	0	440000	700000	0	560000	0	0	0	0	0	0	0	0	0	0	0	0	0
1018811098	80000	660000	520000	920000	0	40000	0	0	0	0	0	0	0	0	0	0	0	0	560000
1029038121	0	20000	520000	320000	1120000	560000	600000	440000	600000	700000	540000	900000	0	0	0	0	740000	560000	0
1030349690	100000	160000	100000	60000	160000	100000	80000	60000	120000	0	0	0	0	0	0	0	0	0	20000
1022718855	620000	660000	620000	960000	1160000	600000	640000	500000	640000	700000	560000	860000	640000	620000	660000	540000	720000	620000	600000
1020550781	580000	560000	400000	760000	0	0	0	0	0	0	0	0	0	0	0	0	0	0	520000
1028179212	740000	800000	540000	1200000	0	0	0	0	0	0	0	0	0	0	0	0	0	0	680000
1028047432	1000000	920000	760000	1840000	0	20000	920000	720000	860000	1140000	0	680000	0	440000	1600000	1120000	940000	940000	880000
1031792756	680000	600000	400000	660000	0	20000	0	0	0	0	0	0	0	0	0	0	0	0	440000
1020062734	660000	680000	560000	1280000	1240000	580000	760000	500000	640000	900000	560000	1160000	660000	580000	660000	500000	660000	700000	640000
1015512734	0	160000	20000	400000	1060000	520000	20000	320000	0	0	0	0	0	0	0	0	0	0	320000
1028907558	460000	420000	60000	900000	1120000	420000	540000	400000	460000	1080000	460000	900000	520000	140000	20000	600000	0	0	20000
1032003112	0	0	220000	880000	560000	340000	0	240000	560000	460000	0	0	0	0	0	0	0	0	0
1031271451	720000	740000	620000	1160000	0	560000	0	0	0	0	0	0	0	0	0	0	0	0	640000
8370955	380000	460000	360000	620000	40000	360000	0	0	0	0	0	0	0	0	0	0	0	0	400000
1028887047	0	120000	260000	480000	0	20000	0	0	0	0	0	0	0	0	0	0	0	0	320000
1020978075	0	0	20000	0	1040000	520000	680000	0	40000	620000	560000	840000	620000	740000	0	260000	0	0	0
1026717377	640000	660000	420000	980000	960000	340000	0	0	0	0	0	0	0	0	0	0	0	0	540000
1021399999	700000	720000	500000	980000	0	0	0	0	0	0	0	0	0	0	0	0	0	0	620000
1031338968	340000	400000	300000	580000	500000	500000	0	0	0	0	0	0	0	0	0	0	0	0	420000
1031357763	700000	660000	520000	900000	0	0	0	0	0	0	0	0	0	0	0	0	0	0	580000
1017738560	460000	520000	360000	720000	0	0	0	0	0	0	0	0	0	0	0	0	0	0	400000
1029291778	640000	800000	480000	940000	920000	580000	600000	460000	600000	680000	0	0	0	0	0	0	0	0	580000
1024327946	580000	540000	340000	820000	780000	400000	320000	280000	320000	0	0	0	0	0	0	0	0	0	420000
1030241065	460000	40000	300000	580000	300000	100000	440000	480000	380000	440000	340000	500000	40000	0	0	0	0	0	320000
1031950902	660000	680000	480000	940000	1060000	560000	600000	400000	620000	680000	60000	820000	640000	620000	0	0	0	0	580000
1031839474	260000	180000	260000	400000	540000	280000	300000	260000	260000	340000	300000	460000	340000	360000	360000	260000	340000	360000	280000
1015243967	680000	660000	960000	20000	0	0	0	0	0	0	0	0	0	0	580000	560000	500000	500000	620000
1025962630	0	0	600000	700000	640000	340000	480000	440000	500000	300000	0	0	0	0	0	0	0	0	0
1027694962	740000	1140000	540000	1920000	1040000	520000	80000	0	0	0	0	0	0	0	0	0	0	0	740000
1018317825	520000	640000	540000	960000	1080000	520000	0	0	0	0	0	0	0	0	0	0	0	0	580000
1020130566	660000	660000	20000	940000	0	0	0	0	0	0	0	0	0	0	0	0	0	0	320000
2034270	0	0	340000	1380000	720000	160000	480000	20000	0	0	0	0	0	0	0	0	0	0	1240000
1031541977	680000	760000	280000	920000	1040000	500000	620000	380000	660000	700000	540000	800000	0	0	0	0	0	0	580000
1020113952	540000	540000	460000	740000	0	0	0	0	0	0	0	0	0	0	0	0	0	0	460000
1030243258	700000	680000	500000	960000	1220000	780000	640000	480000	600000	700000	580000	820000	660000	660000	700000	560000	660000	620000	620000
1023900030	1380000	1540000	540000	2520000	2260000	920000	1520000	720000	2220000	2700000	1000000	2160000	2100000	1380000	2540000	1940000	1460000	1760000	740000
1468643	0	0	20000	0	0	0	0	0	0	0	0	0	0	0	0	0	0	0	0
5890068	440000	440000	300000	540000	0	0	0	0	0	0	0	0	0	0	0	0	0	0	360000
1031263233	800000	620000	460000	1080000	1240000	700000	700000	540000	100000	0	0	0	0	0	0	0	0	0	620000
1026611777	380000	340000	280000	500000	660000	360000	460000	280000	420000	500000	280000	200000	860000	560000	640000	420000	680000	660000	400000
1031924325	700000	620000	520000	960000	1140000	560000	600000	460000	600000	1520000	560000	980000	680000	500000	220000	500000	0	0	580000
1026091621	420000	0	300000	200000	600000	280000	0	0	0	100000	220000	380000	160000	260000	420000	320000	240000	320000	0
9872262	120000	460000	160000	140000	320000	240000	340000	260000	360000	380000	320000	440000	360000	340000	340000	260000	340000	320000	20000
1024615614	660000	660000	40000	920000	0	0	0	0	0	0	0	0	0	0	0	0	0	0	600000
1029506232	680000	660000	540000	940000	860000	660000	300000	0	0	0	0	0	0	0	0	0	0	0	580000
1024624539	640000	700000	700000	920000	720000	220000	220000	120000	220000	0	0	0	0	0	0	0	0	0	640000
1031967618	0	0	20000	0	0	0	0	0	0	380000	0	0	0	0	0	0	0	0	0
5384369	540000	600000	400000	760000	880000	580000	0	0	0	0	0	0	0	0	0	0	0	0	480000
1025598372	0	0	420000	840000	760000	360000	500000	320000	460000	500000	360000	560000	500000	420000	600000	280000	460000	560000	580000
1016118085	800000	660000	640000	1000000	740000	460000	680000	540000	700000	520000	560000	600000	480000	520000	620000	520000	640000	640000	720000
1026293420	680000	660000	600000	940000	0	0	0	0	0	0	0	0	0	0	0	0	0	0	620000
1030911813	0	0	80000	0	0	0	0	0	0	0	0	0	0	0	0	0	0	0	0
1016522453	560000	520000	380000	780000	820000	420000	0	0	0	0	0	0	0	0	0	0	0	0	360000
1032402151	440000	640000	160000	900000	0	0	0	0	0	0	0	0	0	0	0	0	0	0	580000
1032590418	400000	380000	540000	960000	0	0	0	0	0	0	0	0	0	0	0	0	0	0	580000
10803988	280000	540000	340000	600000	940000	360000	500000	760000	700000	400000	460000	840000	540000	360000	0	0	0	0	340000
1021799101	220000	260000	240000	240000	740000	360000	360000	220000	0	620000	520000	680000	620000	240000	360000	380000	320000	340000	460000
1030591817	20000	0	560000	100000	0	0	0	0	0	0	0	0	0	0	0	0	0	0	0
1030776025	500000	700000	600000	1640000	0	440000	0	0	0	0	0	0	0	0	0	0	0	0	420000
1028513289	900000	820000	640000	1400000	1660000	600000	2080000	400000	520000	0	0	0	120000	0	0	0	0	0	680000
1031080899	0	20000	400000	740000	0	0	0	0	0	0	0	0	0	0	0	0	0	0	480000
1023391048	0	0	540000	840000	380000	560000	0	0	0	0	0	0	0	0	0	0	0	0	380000
1024218892	420000	540000	520000	900000	2500000	600000	800000	480000	620000	700000	580000	960000	20000	0	0	0	0	0	480000
9604464	440000	440000	260000	600000	0	0	0	0	0	0	0	0	0	0	0	0	0	0	420000
1020865964	540000	540000	460000	1180000	0	0	0	0	0	0	0	0	0	0	0	0	0	0	500000
1021529528	300000	320000	100000	440000	20000	60000	140000	40000	20000	300000	180000	200000	260000	80000	0	0	0	0	40000
1023014994	660000	680000	40000	880000	860000	460000	520000	380000	520000	380000	0	0	0	0	0	0	0	0	600000
1024521378	560000	1060000	420000	960000	900000	40000	820000	920000	660000	1040000	500000	1700000	680000	580000	0	0	0	0	380000
1022508748	660000	660000	520000	920000	1060000	520000	580000	460000	600000	420000	560000	860000	620000	560000	660000	480000	640000	600000	640000
1026264170	680000	680000	500000	1200000	1140000	640000	20000	0	0	0	0	0	0	0	0	0	0	0	600000
1031168373	660000	740000	900000	940000	0	0	0	0	0	0	0	0	0	0	0	0	0	0	600000
1498153	220000	580000	60000	880000	60000	20000	0	0	0	0	0	0	0	0	0	0	0	0	280000
1030017319	480000	540000	200000	680000	180000	200000	180000	260000	480000	400000	380000	460000	360000	380000	400000	360000	780000	340000	460000
1032549306	700000	560000	20000	1000000	0	0	0	0	0	0	0	0	0	0	0	0	0	0	540000
1025950524	0	680000	560000	960000	1040000	620000	600000	500000	620000	660000	0	0	0	0	0	0	0	0	640000
1030126170	180000	60000	20000	940000	340000	240000	800000	420000	540000	540000	20000	200000	0	0	0	0	0	0	620000
1030818217	760000	720000	500000	1020000	960000	620000	400000	480000	680000	740000	860000	1680000	620000	580000	20000	20000	40000	20000	700000
1031212487	580000	1080000	720000	1460000	20000	540000	0	0	0	0	0	0	0	0	0	0	0	0	820000
4045266	0	0	80000	0	1900000	880000	740000	760000	820000	0	0	0	0	0	600000	420000	680000	800000	0
1031108988	800000	640000	480000	1000000	1000000	440000	540000	340000	80000	640000	560000	780000	620000	520000	480000	280000	620000	600000	20000
1022217846	260000	20000	500000	1100000	0	0	0	0	0	1120000	1140000	1440000	680000	460000	0	0	0	0	580000
1017595258	0	0	120000	940000	0	0	0	0	0	0	0	0	0	0	0	0	0	0	680000
1032633438	680000	660000	480000	920000	320000	540000	0	0	0	0	0	0	0	0	0	0	0	0	800000
1031399579	680000	700000	1340000	1260000	0	0	0	0	0	0	0	0	0	0	0	0	0	0	640000
1032059201	660000	800000	240000	980000	1100000	460000	1080000	460000	680000	940000	600000	1040000	680000	620000	660000	320000	260000	620000	740000
1030266168	0	760000	20000	340000	0	20000	0	0	0	0	0	0	0	0	0	0	0	0	860000
1031339603	0	680000	480000	880000	0	0	0	0	0	0	0	0	0	0	0	0	0	0	560000
1022213787	660000	660000	480000	920000	0	0	0	0	0	0	0	0	0	0	0	0	0	0	480000
1031380587	460000	0	40000	40000	0	0	0	0	0	0	0	0	0	0	0	0	0	0	0
10905643	500000	520000	520000	1080000	940000	460000	420000	320000	440000	20000	0	0	680000	540000	440000	400000	440000	420000	460000
1026917523	740000	720000	540000	960000	0	0	0	0	0	0	0	0	0	0	0	0	0	0	720000
11596169	0	0	520000	1020000	240000	640000	0	0	0	0	0	0	0	0	0	0	0	0	600000
1028770320	1340000	700000	500000	920000	0	0	0	0	0	0	0	0	0	0	0	0	0	0	600000
9379127	400000	460000	220000	680000	0	0	0	0	0	0	0	0	0	0	0	0	0	0	300000
9211766	0	0	480000	1060000	0	320000	0	0	0	0	0	0	0	0	0	0	0	0	0
1021970053	740000	0	500000	980000	1080000	540000	660000	480000	660000	0	0	0	0	0	0	0	640000	640000	660000
4562744	200000	0	380000	980000	0	20000	0	0	0	0	0	0	0	0	0	0	0	0	580000
1028580105	840000	860000	840000	980000	0	260000	0	0	0	0	0	0	0	0	0	0	0	0	580000
1015966697	0	0	400000	920000	1020000	0	460000	0	0	700000	0	540000	0	0	0	0	0	0	0
1030742186	580000	500000	40000	340000	280000	100000	0	0	0	0	0	0	0	0	0	0	0	0	340000
1030452681	120000	40000	180000	60000	80000	60000	60000	20000	0	0	0	0	0	0	0	0	0	0	60000
12924437	860000	860000	540000	2140000	1180000	540000	440000	300000	400000	860000	540000	1440000	880000	640000	1180000	560000	1300000	900000	760000
1030979155	700000	660000	20000	900000	0	0	0	0	0	0	0	0	0	0	0	0	0	0	600000
9329513	300000	0	500000	1080000	1140000	600000	700000	520000	620000	880000	520000	960000	720000	600000	600000	600000	540000	520000	0
1016080523	700000	700000	360000	640000	1380000	640000	680000	500000	240000	840000	500000	940000	640000	920000	0	0	0	0	460000
1030173355	740000	740000	500000	0	0	0	0	0	0	0	0	0	0	0	0	0	0	0	620000
1017475146	420000	400000	80000	520000	0	0	0	0	0	0	0	0	0	0	0	0	0	0	460000
1025715971	720000	880000	20000	380000	0	0	0	0	0	0	0	0	0	0	0	0	0	0	660000
1028516773	560000	700000	340000	0	0	0	0	0	0	240000	0	100000	0	0	0	0	0	0	80000
1026382488	680000	680000	520000	940000	0	0	0	0	0	0	0	0	0	0	0	0	0	0	600000
1016127224	0	20000	420000	960000	1060000	540000	220000	0	0	0	0	0	0	0	0	0	0	0	600000
3075452	660000	560000	460000	740000	840000	440000	520000	400000	560000	560000	40000	20000	540000	540000	520000	420000	520000	500000	520000
1028294486	420000	380000	320000	480000	520000	220000	400000	120000	80000	60000	40000	60000	60000	100000	260000	280000	340000	280000	340000
1032342089	680000	160000	20000	1100000	700000	80000	0	0	0	860000	40000	140000	0	0	0	0	0	0	40000
1031400104	60000	40000	80000	80000	80000	20000	40000	160000	20000	0	20000	20000	180000	80000	60000	100000	40000	80000	40000
1020966806	480000	580000	300000	560000	640000	240000	340000	300000	20000	0	0	0	0	0	0	0	0	0	180000
1031757109	660000	760000	260000	720000	0	0	0	0	0	0	0	0	0	0	0	0	0	0	680000
1029447090	320000	340000	280000	480000	540000	280000	300000	260000	380000	380000	300000	420000	320000	380000	400000	240000	220000	260000	300000
1032868905	660000	720000	20000	1220000	0	0	0	0	0	0	0	0	0	0	0	0	0	0	600000
1023270519	380000	540000	500000	440000	1040000	580000	540000	480000	600000	680000	480000	780000	220000	0	0	0	0	0	280000
1018470812	340000	320000	260000	440000	500000	280000	340000	260000	300000	360000	260000	400000	300000	20000	0	0	0	0	240000
1032006912	0	0	500000	1020000	20000	460000	160000	0	0	0	0	0	0	0	0	0	0	0	640000
1031633876	660000	700000	520000	920000	0	0	0	0	0	0	0	0	0	0	0	0	0	0	980000
1031460113	720000	660000	520000	920000	1160000	540000	580000	480000	640000	740000	560000	860000	680000	600000	640000	540000	680000	620000	600000
1031623316	680000	640000	440000	1000000	0	0	580000	500000	20000	0	0	0	0	0	0	0	0	0	640000
1032347291	1720000	1460000	560000	1300000	2000000	680000	840000	740000	800000	1640000	920000	1320000	920000	960000	1220000	920000	1060000	860000	860000
1019779734	280000	220000	320000	2360000	720000	400000	0	0	0	0	0	0	0	0	0	0	0	0	280000
1029078467	0	0	540000	800000	940000	200000	440000	300000	220000	0	0	0	0	0	0	0	0	0	560000
1026550373	580000	440000	40000	740000	0	0	0	0	0	0	0	0	0	0	0	0	0	0	440000
1032141897	600000	420000	460000	940000	0	0	0	0	0	0	0	0	0	0	0	0	0	0	540000
1022935732	0	0	500000	920000	0	0	0	0	0	0	0	0	0	0	0	0	0	0	600000
1031362540	940000	900000	820000	960000	0	0	0	0	0	0	0	0	0	0	0	0	0	0	820000
1022746203	680000	720000	420000	1040000	300000	320000	140000	360000	660000	500000	0	0	0	0	0	0	0	0	600000
8166095	780000	680000	500000	960000	0	0	0	0	0	700000	500000	840000	660000	560000	740000	540000	700000	620000	600000
1029595354	400000	340000	320000	540000	540000	280000	340000	340000	340000	0	0	0	0	0	0	0	0	0	340000
1025241110	100000	880000	520000	760000	0	0	0	0	0	0	0	0	0	0	0	0	0	0	40000
1023962998	340000	360000	260000	720000	640000	320000	400000	280000	400000	340000	280000	380000	380000	400000	0	0	0	0	380000
1018726859	640000	680000	180000	900000	1040000	600000	600000	440000	620000	480000	60000	340000	0	0	0	0	0	60000	0
1031054009	0	840000	740000	1020000	20000	560000	0	0	0	0	0	0	0	0	0	0	0	0	620000
1031009582	700000	980000	400000	980000	860000	540000	0	0	0	0	0	0	0	0	0	0	0	0	600000
12828910	480000	360000	340000	620000	0	0	0	320000	460000	460000	380000	580000	480000	20000	260000	340000	0	0	400000
1031231428	660000	700000	500000	880000	1360000	1580000	620000	480000	660000	620000	0	0	0	0	0	0	0	240000	500000
1030487413	800000	820000	20000	1320000	780000	120000	380000	200000	80000	0	140000	280000	400000	340000	1380000	540000	560000	820000	340000
1030389458	400000	360000	20000	0	360000	320000	320000	260000	360000	380000	120000	140000	340000	360000	20000	280000	480000	40000	0
1032342864	0	0	400000	1080000	1060000	520000	460000	0	0	0	0	0	0	0	0	0	0	0	840000
1030261091	660000	680000	560000	980000	0	0	0	0	0	0	0	0	0	0	0	0	0	0	600000
1424907	660000	780000	480000	1040000	1040000	680000	700000	460000	620000	1000000	760000	1100000	780000	0	0	0	0	0	620000
1021714854	460000	480000	440000	1100000	900000	500000	540000	540000	560000	260000	0	0	0	0	0	0	0	0	340000
1030312094	480000	540000	340000	600000	760000	20000	540000	380000	460000	540000	420000	620000	60000	0	0	0	0	0	380000
1025621479	540000	20000	500000	760000	1060000	540000	600000	400000	480000	660000	600000	860000	600000	600000	520000	400000	500000	480000	500000
8188154	460000	540000	260000	480000	540000	480000	560000	100000	160000	740000	480000	700000	20000	0	340000	420000	0	40000	520000
1030696017	980000	880000	500000	1840000	1240000	600000	660000	460000	1000000	1660000	560000	1340000	20000	0	0	0	0	0	720000
1022448187	0	60000	480000	940000	920000	500000	320000	220000	20000	0	0	0	0	0	0	0	0	0	600000
1023294628	40000	440000	280000	20000	500000	400000	0	0	0	0	0	0	0	0	0	0	0	0	40000
1022604105	360000	360000	300000	20000	540000	280000	340000	300000	360000	120000	320000	440000	380000	320000	380000	260000	360000	340000	320000
1032630194	0	0	340000	620000	0	360000	0	0	0	0	0	0	0	0	0	0	0	0	500000
1030367090	680000	860000	700000	1540000	1400000	620000	680000	140000	0	0	0	0	0	0	0	0	0	0	640000
1031706377	700000	720000	420000	760000	400000	500000	0	0	0	0	0	0	0	0	0	0	0	0	560000
1030525351	560000	660000	260000	480000	0	120000	0	0	0	0	0	0	0	0	0	0	0	0	340000
1032315015	0	0	700000	0	1260000	660000	720000	560000	620000	860000	600000	740000	680000	580000	380000	220000	0	0	20000
1031832830	500000	520000	660000	560000	540000	140000	400000	180000	260000	0	0	0	0	0	0	0	0	0	260000
1017231527	700000	700000	540000	940000	1220000	540000	620000	500000	660000	700000	560000	860000	900000	660000	620000	480000	560000	620000	640000
1025232299	640000	680000	480000	920000	1040000	540000	580000	20000	0	0	0	0	0	0	0	0	0	0	620000
1031591340	720000	720000	620000	1020000	0	0	0	0	0	0	0	0	0	0	0	0	0	0	600000
1024399559	700000	640000	140000	320000	0	20000	0	0	0	0	0	0	0	0	0	0	0	0	580000
1016055348	660000	620000	420000	860000	1320000	540000	500000	540000	800000	0	0	0	0	0	0	0	0	0	480000
1923709	20000	640000	460000	1040000	0	0	0	0	0	0	0	0	0	0	0	0	0	0	600000
1032376968	560000	620000	300000	580000	40000	480000	340000	320000	480000	360000	480000	420000	360000	340000	0	40000	0	0	320000
1019497871	660000	680000	520000	900000	0	0	0	0	0	0	0	0	0	0	0	0	0	0	600000
1030315691	660000	720000	560000	1360000	1260000	520000	0	0	0	0	0	0	0	0	0	0	0	0	620000
8115044	660000	1340000	480000	960000	0	0	0	0	0	0	0	0	0	0	0	0	0	0	620000
1021518397	100000	80000	80000	80000	80000	60000	120000	200000	100000	40000	80000	120000	0	0	0	0	0	0	60000
1022816904	0	0	260000	0	600000	400000	0	0	60000	0	0	0	0	0	0	0	0	0	0
1027319707	640000	640000	400000	780000	1060000	680000	860000	540000	660000	700000	1120000	860000	660000	640000	660000	520000	680000	620000	660000
1026543484	740000	760000	500000	1240000	1120000	560000	660000	540000	20000	840000	0	0	0	0	0	0	0	0	580000
1031199270	540000	500000	420000	720000	1000000	400000	520000	420000	680000	700000	460000	700000	520000	540000	0	0	20000	0	440000
1030406207	80000	40000	40000	40000	40000	40000	40000	40000	20000	40000	40000	40000	40000	40000	0	40000	0	0	40000
1026290144	0	0	720000	940000	1080000	480000	800000	500000	900000	660000	0	0	0	0	0	0	0	0	0
1024672502	140000	0	760000	840000	1140000	540000	720000	560000	640000	860000	0	360000	0	0	0	0	0	0	0
1030225620	660000	660000	460000	920000	440000	20000	420000	140000	0	700000	340000	760000	400000	220000	660000	500000	0	520000	720000
1030944507	800000	840000	360000	1060000	960000	540000	700000	480000	600000	800000	640000	980000	740000	620000	940000	520000	700000	460000	860000
1026717687	720000	860000	940000	880000	1040000	640000	740000	560000	580000	800000	0	560000	80000	20000	880000	560000	760000	680000	520000
1029374834	120000	360000	340000	340000	400000	560000	300000	20000	0	0	0	0	0	0	0	0	0	0	340000
1025167447	720000	920000	700000	1080000	1140000	540000	300000	420000	380000	0	0	0	0	0	0	0	0	0	580000
1031377496	1420000	860000	840000	220000	1600000	760000	340000	0	0	0	0	0	0	0	0	0	0	0	660000
492044	640000	700000	420000	720000	720000	420000	520000	380000	420000	480000	500000	640000	440000	460000	0	0	20000	0	540000
1030346925	560000	540000	20000	1060000	0	0	0	0	0	0	0	0	0	0	0	0	0	0	560000
1023173396	1700000	900000	1120000	1200000	1980000	1180000	980000	680000	660000	1320000	980000	1760000	1660000	480000	1460000	1680000	920000	1080000	740000
1029774940	720000	780000	660000	880000	1080000	620000	580000	40000	600000	820000	560000	880000	660000	640000	700000	500000	720000	80000	640000
1030442357	0	0	300000	760000	0	0	0	0	0	0	0	0	0	0	0	0	0	0	480000
1021909975	460000	460000	240000	980000	0	0	0	0	0	0	0	0	0	0	0	0	0	0	440000
1030793008	760000	700000	700000	1560000	960000	380000	860000	0	0	0	0	0	0	0	0	0	0	0	500000
665239	520000	540000	520000	740000	0	0	0	0	0	0	0	0	0	0	0	0	0	0	580000
1018321072	100000	200000	60000	260000	540000	280000	320000	280000	300000	380000	320000	480000	320000	340000	380000	260000	340000	340000	200000
1023911378	760000	660000	60000	0	600000	320000	380000	300000	360000	440000	340000	540000	420000	340000	380000	300000	380000	380000	60000
1018540549	320000	680000	660000	960000	0	0	0	0	0	0	0	0	0	0	0	0	0	0	640000
1019420541	240000	260000	80000	380000	0	0	0	0	0	0	0	0	0	0	0	0	0	0	200000
1029012820	680000	620000	200000	360000	260000	140000	80000	0	0	0	0	0	0	0	0	0	0	0	0
1022783163	160000	460000	620000	980000	840000	380000	480000	380000	420000	720000	560000	940000	300000	180000	420000	120000	480000	320000	140000
1030345539	620000	720000	660000	1000000	0	0	0	0	0	0	0	0	0	0	0	0	0	0	440000
1026013010	300000	220000	500000	900000	520000	580000	0	0	0	0	0	0	0	0	0	0	0	0	640000
1032018559	740000	660000	180000	1240000	1020000	540000	40000	0	0	0	0	0	0	0	0	0	0	0	760000
1030445236	320000	1080000	640000	1560000	1380000	760000	0	0	0	0	0	0	500000	820000	1280000	1260000	760000	800000	860000
11072894	660000	680000	980000	1840000	840000	640000	620000	440000	560000	440000	520000	200000	560000	320000	320000	480000	220000	160000	640000
1025043438	680000	660000	160000	940000	0	0	0	0	0	0	0	0	0	0	0	0	0	0	640000
4649010	520000	460000	360000	600000	900000	420000	400000	360000	480000	420000	360000	480000	580000	360000	380000	400000	480000	460000	400000
1032437703	700000	660000	480000	940000	300000	540000	0	0	0	0	0	0	0	0	0	0	0	0	540000
1024879449	640000	940000	500000	880000	1560000	800000	880000	480000	200000	140000	420000	640000	340000	200000	0	0	0	0	640000
10779093	0	760000	520000	920000	1060000	580000	680000	480000	640000	100000	540000	840000	640000	600000	620000	500000	640000	640000	780000
10765902	840000	700000	600000	2560000	1780000	560000	460000	560000	740000	0	0	0	0	0	0	0	0	0	1000000
1026568503	0	0	900000	900000	1000000	620000	0	0	0	0	0	0	0	580000	20000	500000	0	0	640000
1030882806	860000	860000	540000	960000	720000	340000	600000	420000	640000	800000	0	760000	0	0	0	0	0	0	600000
1028741476	0	0	400000	620000	580000	360000	0	0	0	0	0	0	0	0	0	0	0	0	0
1025109051	440000	560000	480000	1000000	460000	580000	80000	180000	180000	160000	340000	120000	500000	220000	640000	620000	660000	680000	640000
1025777775	400000	600000	340000	920000	0	20000	0	0	0	0	0	0	0	0	0	0	0	0	340000
1031642649	20000	40000	560000	0	1020000	540000	640000	400000	500000	400000	340000	500000	560000	580000	620000	800000	580000	560000	0
2073082	840000	480000	340000	620000	900000	400000	540000	400000	420000	520000	420000	580000	540000	440000	20000	360000	0	0	420000
1032967594	660000	660000	860000	900000	1040000	520000	180000	0	0	0	0	0	0	0	0	0	0	0	740000
1016183961	0	0	20000	300000	0	0	0	0	0	0	0	0	0	0	0	0	0	0	360000
1032867667	720000	660000	20000	940000	0	0	0	0	0	0	0	0	0	0	0	0	0	0	660000
1017737277	660000	680000	440000	0	0	0	0	0	0	0	0	0	0	0	0	0	0	0	480000
1014692768	480000	460000	440000	560000	20000	0	0	0	0	0	0	0	0	0	0	0	0	0	560000
1030348124	320000	680000	600000	960000	1060000	540000	600000	480000	700000	700000	580000	840000	640000	620000	720000	520000	680000	640000	600000
1026706130	660000	40000	480000	980000	1100000	580000	620000	480000	560000	260000	160000	440000	80000	460000	1400000	540000	880000	740000	600000
1029982508	480000	460000	380000	480000	0	0	0	0	0	0	0	0	0	0	0	0	0	0	340000
1027022752	0	20000	480000	900000	0	460000	0	0	0	100000	600000	860000	660000	620000	640000	500000	0	20000	560000
1030174457	660000	1000000	720000	1100000	320000	100000	740000	460000	580000	0	0	0	0	0	0	0	0	0	700000
1025855574	0	0	800000	660000	0	0	0	0	0	0	20000	0	560000	400000	0	0	0	0	20000
1031042522	60000	0	260000	460000	160000	220000	0	100000	260000	0	0	0	0	0	0	0	0	0	60000
6165468	620000	700000	520000	900000	1100000	600000	20000	0	0	820000	520000	820000	20000	0	0	0	0	0	620000
1031364220	320000	20000	60000	400000	0	0	0	0	0	0	0	0	0	0	0	0	0	0	0
1032610160	0	0	480000	920000	0	0	0	0	0	520000	0	0	0	0	0	0	0	0	0
1020023389	680000	700000	520000	960000	920000	460000	420000	460000	780000	740000	520000	880000	720000	680000	0	0	0	0	620000
8370370	0	0	20000	920000	0	0	0	0	0	0	0	0	0	0	0	0	0	0	0
1031233591	760000	880000	440000	960000	0	0	0	0	0	0	0	0	0	0	0	0	0	0	700000
1024522169	740000	720000	540000	900000	1560000	640000	640000	180000	0	0	0	0	0	0	0	0	0	0	400000
1031030660	0	0	120000	0	0	0	0	0	0	0	0	0	0	0	0	0	0	0	20000
1031592144	1220000	660000	540000	620000	0	0	0	0	0	0	0	0	0	0	0	0	0	0	380000
1029465445	660000	660000	460000	920000	820000	540000	340000	480000	640000	0	0	0	0	0	0	0	0	0	600000
1031732915	680000	700000	480000	920000	1060000	560000	400000	0	0	0	0	0	0	0	0	0	0	0	620000
1027185622	340000	320000	60000	300000	380000	40000	200000	180000	280000	340000	280000	380000	300000	280000	260000	260000	240000	220000	300000
1027797495	720000	680000	20000	960000	0	0	0	0	0	0	0	0	0	0	0	0	0	0	880000
11974119	680000	660000	740000	640000	700000	320000	460000	380000	720000	340000	0	0	0	0	0	0	0	0	480000
1025707010	580000	980000	660000	1600000	1620000	660000	600000	480000	580000	720000	560000	840000	640000	600000	620000	500000	620000	600000	880000
1031430986	600000	720000	540000	1220000	1240000	560000	660000	480000	640000	680000	520000	960000	600000	940000	660000	520000	740000	640000	640000
1020834018	740000	800000	580000	960000	1140000	560000	640000	660000	720000	0	0	0	0	0	620000	440000	520000	500000	600000
1024234595	660000	700000	520000	940000	1100000	540000	580000	520000	560000	80000	560000	760000	640000	640000	0	0	0	0	680000
1017523682	80000	60000	520000	960000	1100000	620000	600000	480000	620000	0	0	0	0	0	0	0	0	0	100000
5112048	0	20000	80000	1000000	0	0	640000	100000	100000	60000	0	300000	760000	700000	420000	380000	360000	340000	640000
1030834217	640000	420000	560000	1060000	760000	280000	420000	280000	360000	420000	0	480000	0	0	0	0	0	0	700000
1026999999	460000	460000	560000	800000	1040000	540000	20000	0	0	0	0	0	0	0	0	0	0	0	340000
1027852437	800000	680000	500000	1020000	0	0	0	0	0	0	0	0	0	0	0	0	0	0	620000
1025931121	540000	520000	400000	740000	0	0	0	0	0	660000	520000	1040000	560000	500000	520000	640000	0	0	0
1032659872	0	0	480000	940000	1300000	560000	180000	0	0	0	0	0	0	0	0	0	0	0	0
1031641511	680000	700000	580000	1040000	1100000	520000	620000	100000	0	0	0	0	0	0	0	0	0	0	760000
1028601852	0	700000	520000	920000	1080000	500000	220000	0	0	0	0	0	0	0	0	0	0	0	600000
1023669859	360000	340000	260000	480000	0	0	0	0	0	0	0	0	0	0	0	0	0	0	320000
1030820045	20000	680000	40000	980000	0	0	0	0	0	0	0	0	0	0	0	0	0	0	580000
1027729878	460000	480000	340000	720000	340000	0	0	0	0	0	0	20000	20000	120000	0	0	20000	40000	200000
1032287882	680000	620000	900000	980000	1280000	720000	840000	720000	780000	240000	400000	1120000	880000	880000	1360000	880000	660000	580000	520000
1027096620	680000	660000	500000	920000	0	0	0	0	0	0	0	0	0	0	0	0	0	0	600000
1030081136	420000	540000	400000	740000	860000	440000	340000	0	0	0	0	0	0	0	0	0	0	0	480000
1029867028	0	0	20000	0	680000	700000	0	0	0	0	0	0	0	0	0	0	0	0	0
1029187801	680000	920000	600000	1240000	0	0	0	0	0	0	0	0	0	0	0	0	0	0	580000
1029145825	800000	860000	500000	960000	1040000	560000	700000	600000	720000	700000	560000	840000	620000	600000	660000	480000	660000	620000	620000
5309138	680000	640000	500000	920000	0	0	40000	20000	0	0	20000	20000	680000	620000	640000	540000	40000	0	580000
1032511981	0	660000	40000	840000	0	0	0	0	0	0	0	0	0	0	0	0	0	0	600000
1027090806	0	1020000	360000	980000	940000	460000	40000	0	0	120000	0	0	0	0	660000	480000	420000	440000	620000
1021360600	0	120000	420000	640000	40000	340000	0	0	0	0	0	0	0	0	0	0	0	0	520000
1031078269	440000	480000	440000	840000	0	0	0	0	0	0	0	0	0	0	0	0	0	0	540000
1029442449	640000	700000	480000	920000	1080000	560000	600000	600000	600000	700000	580000	860000	660000	640000	680000	540000	680000	640000	600000
1019841018	340000	300000	300000	540000	0	0	0	0	0	0	0	0	0	0	0	0	0	0	0
1032326486	300000	340000	260000	480000	540000	280000	340000	260000	300000	400000	300000	240000	360000	320000	320000	280000	0	0	320000
1032302477	740000	620000	500000	960000	1140000	620000	700000	540000	660000	740000	0	80000	0	0	20000	40000	0	20000	720000
1030426809	680000	660000	360000	720000	1060000	640000	700000	60000	40000	20000	0	0	0	0	320000	200000	0	20000	540000
1025843222	700000	680000	480000	920000	0	0	0	0	0	0	0	0	0	0	0	0	0	0	600000
2036787	0	680000	300000	1060000	0	0	0	0	0	0	0	0	0	0	0	0	0	0	840000
1032021747	0	0	500000	120000	1060000	560000	480000	0	0	0	0	0	0	0	0	0	660000	220000	0
1014952500	600000	660000	520000	860000	0	0	0	0	0	0	0	0	0	0	0	0	0	0	580000
6483574	440000	400000	280000	480000	0	0	0	0	0	0	0	0	0	0	0	0	0	0	360000
1025232217	580000	540000	300000	680000	880000	460000	500000	480000	560000	620000	240000	640000	540000	460000	580000	380000	480000	420000	400000
1015425188	540000	480000	420000	680000	680000	440000	500000	460000	480000	0	580000	620000	500000	600000	580000	500000	560000	540000	480000
1029660953	580000	680000	520000	920000	0	0	0	0	0	0	0	0	0	0	0	0	0	0	600000
1028531865	0	540000	520000	880000	1000000	480000	0	0	0	0	0	0	0	0	0	0	0	0	600000
1017635477	700000	0	900000	940000	1220000	600000	660000	520000	760000	0	0	0	0	0	0	0	0	0	0
1031839633	740000	580000	480000	880000	120000	400000	0	0	0	0	0	0	0	0	0	0	0	0	460000
1031375166	580000	540000	420000	760000	0	0	0	0	0	0	0	0	0	0	0	0	0	0	480000
1031310318	0	0	300000	920000	0	0	0	0	0	0	0	0	0	0	0	0	0	0	620000
1031796631	280000	360000	260000	460000	0	20000	0	0	0	0	0	0	0	0	0	0	0	0	340000
1029630992	560000	560000	400000	740000	840000	440000	500000	340000	460000	0	0	0	0	0	0	0	0	0	480000
1025587182	220000	0	560000	0	1240000	900000	600000	480000	620000	120000	0	0	0	0	0	0	0	0	0
1030386376	0	0	500000	0	1140000	540000	860000	480000	620000	740000	560000	860000	640000	680000	180000	500000	0	0	0
1030830350	60000	680000	620000	900000	740000	380000	340000	240000	180000	0	360000	320000	320000	320000	740000	580000	460000	580000	600000
1024437682	1420000	1420000	480000	1300000	980000	500000	80000	0	0	520000	260000	580000	880000	400000	640000	480000	0	60000	1640000
1026477626	380000	320000	120000	660000	0	0	0	0	0	0	0	0	0	0	0	0	0	0	320000
1026163066	660000	660000	480000	920000	620000	540000	0	0	0	0	0	0	0	0	0	0	0	0	600000
1032347867	240000	620000	40000	740000	1040000	580000	600000	0	0	0	0	0	0	0	0	0	0	0	600000
1028026392	360000	420000	20000	540000	0	0	0	0	0	0	0	0	0	0	0	0	0	0	380000
1030882066	2200000	1500000	160000	320000	720000	320000	160000	60000	300000	660000	580000	820000	1380000	720000	720000	500000	680000	1160000	440000
1030922601	560000	260000	640000	0	640000	300000	460000	360000	460000	80000	20000	160000	1680000	540000	0	220000	0	0	0
1026045480	0	40000	280000	1300000	0	0	0	0	0	0	0	0	0	0	0	0	0	0	600000
1025917560	60000	60000	60000	60000	0	0	0	0	0	0	0	0	0	0	0	0	0	0	0
1031211395	440000	460000	480000	800000	320000	220000	120000	180000	200000	0	0	0	0	0	0	0	0	0	340000
1018916996	0	0	620000	920000	0	0	660000	420000	20000	0	500000	820000	1340000	880000	740000	640000	280000	660000	600000
1023990248	940000	960000	40000	1040000	0	0	0	0	0	0	0	0	0	0	0	0	0	0	1020000
1031456497	540000	400000	20000	1000000	0	0	0	0	0	0	0	0	0	0	0	0	0	0	660000
1019827877	700000	660000	480000	920000	1080000	620000	20000	0	0	0	0	0	0	0	0	0	0	0	620000
1031438413	780000	720000	560000	940000	0	0	0	0	0	0	0	0	0	0	0	0	0	0	660000
3043273	420000	0	480000	20000	0	0	0	0	0	0	0	0	0	0	0	0	0	0	0
1022119929	740000	780000	480000	860000	0	0	0	0	0	0	0	0	0	0	0	0	0	0	660000
1026725049	660000	660000	360000	880000	1040000	340000	20000	0	0	0	0	0	0	0	0	0	0	0	640000
1019410710	840000	1280000	820000	2300000	1080000	640000	1340000	820000	860000	680000	600000	800000	1120000	620000	800000	520000	680000	740000	760000
10907700	920000	20000	500000	900000	920000	540000	20000	0	0	0	0	0	0	0	0	0	0	0	580000
1022909151	0	440000	320000	640000	740000	420000	20000	0	140000	520000	380000	580000	800000	280000	340000	300000	400000	360000	400000
1019611841	900000	840000	480000	940000	960000	720000	20000	0	0	0	0	0	0	0	0	0	0	0	840000
1030990266	660000	660000	480000	940000	0	0	0	0	0	0	0	0	0	0	0	0	0	0	600000
1026195921	660000	780000	520000	900000	920000	480000	560000	480000	560000	580000	560000	900000	680000	600000	0	20000	0	0	680000
2866190	920000	840000	940000	1540000	2060000	720000	1000000	860000	1700000	920000	2340000	1140000	1100000	100000	0	0	940000	620000	820000
1014241850	620000	780000	780000	1480000	0	360000	0	0	0	0	0	0	560000	400000	960000	760000	440000	660000	900000
1032463621	1100000	1240000	700000	1580000	1720000	1180000	1080000	700000	1300000	1080000	1020000	1500000	1040000	740000	820000	740000	560000	740000	380000
1032061058	800000	680000	520000	940000	0	440000	0	0	0	0	0	0	0	0	0	0	0	0	600000
822318	440000	340000	260000	520000	500000	300000	480000	320000	340000	420000	0	120000	320000	360000	120000	260000	0	0	320000
1031673829	700000	700000	460000	940000	1040000	360000	740000	440000	520000	860000	640000	980000	900000	800000	0	0	720000	580000	620000
1026781557	840000	820000	880000	1180000	1600000	480000	800000	560000	740000	1080000	660000	1160000	820000	740000	1140000	1060000	460000	1020000	600000
1029906384	660000	660000	340000	920000	840000	200000	80000	240000	400000	700000	0	400000	0	0	0	0	0	0	600000
1021782100	900000	1000000	760000	1380000	1140000	660000	120000	40000	380000	660000	300000	760000	120000	60000	360000	280000	1260000	1260000	1020000
6796271	460000	540000	220000	740000	0	0	0	420000	120000	0	0	0	0	0	0	0	140000	100000	300000
1020003716	660000	1380000	480000	920000	1060000	540000	160000	0	0	0	0	0	0	0	0	0	0	0	640000
1025352264	660000	660000	480000	920000	1080000	560000	600000	500000	680000	1140000	580000	1340000	700000	620000	660000	480000	660000	660000	600000
1031515468	680000	640000	480000	900000	0	0	0	0	0	0	0	0	0	0	0	0	0	0	500000
1016686226	620000	500000	380000	700000	880000	400000	540000	220000	460000	520000	420000	560000	440000	420000	460000	360000	640000	80000	480000
1031693782	960000	820000	100000	200000	1120000	500000	660000	440000	360000	800000	600000	860000	660000	600000	640000	500000	660000	620000	620000
8859978	440000	320000	300000	480000	0	0	0	0	0	0	0	0	0	0	0	0	0	0	320000
1032735809	660000	680000	480000	920000	1060000	560000	620000	460000	660000	40000	0	0	0	0	0	0	0	0	620000
1031072646	400000	400000	260000	480000	540000	280000	40000	0	0	0	0	0	0	0	0	0	0	0	320000
10977396	500000	520000	300000	640000	500000	380000	0	0	0	20000	0	0	0	0	0	0	0	0	400000
9734207	440000	360000	320000	440000	60000	380000	360000	280000	420000	100000	0	0	0	0	0	0	0	0	380000
1032846077	0	0	380000	1080000	560000	20000	0	0	0	0	0	0	0	40000	0	0	0	0	0
12057647	1020000	580000	60000	1100000	1460000	500000	540000	440000	800000	240000	20000	20000	660000	40000	40000	80000	60000	40000	700000
2816528	0	680000	340000	920000	0	0	0	0	0	0	0	0	0	0	0	0	0	0	520000
1014066336	680000	680000	480000	1000000	0	0	0	0	0	0	0	0	0	0	0	0	0	0	660000
1031027895	980000	700000	760000	1240000	800000	20000	380000	420000	300000	160000	160000	540000	520000	180000	20000	220000	480000	300000	140000
1031225165	720000	660000	480000	960000	1620000	580000	880000	480000	640000	780000	600000	840000	800000	640000	660000	480000	640000	620000	600000
1031672521	0	0	40000	1400000	0	0	0	0	0	0	0	0	0	0	0	0	0	0	420000
1019107610	620000	580000	360000	960000	0	20000	0	0	0	0	0	0	0	0	0	0	0	0	620000
1020434499	0	0	240000	220000	0	0	0	0	0	0	0	0	0	0	0	0	0	0	580000
1030821157	1180000	1320000	500000	700000	1280000	520000	640000	500000	580000	1000000	620000	1200000	620000	580000	660000	500000	760000	1360000	580000
1022663206	700000	740000	660000	920000	1120000	580000	20000	480000	640000	680000	560000	820000	620000	660000	0	160000	0	0	620000
1031772870	680000	660000	500000	960000	0	20000	0	0	0	0	0	0	0	0	0	0	0	0	580000
1015629075	680000	600000	540000	1020000	20000	340000	0	0	0	0	0	0	640000	620000	680000	500000	700000	660000	320000
1031632246	540000	520000	420000	640000	520000	60000	520000	300000	20000	0	340000	20000	560000	400000	440000	340000	460000	540000	520000
1031067789	1560000	1680000	1200000	2100000	1940000	620000	520000	400000	380000	700000	1620000	1940000	1500000	1480000	1340000	1220000	660000	620000	660000
1029237789	600000	740000	460000	1300000	0	20000	180000	340000	580000	840000	0	240000	860000	280000	0	0	0	0	700000
1031357606	0	20000	340000	0	700000	440000	760000	660000	840000	740000	20000	820000	880000	680000	640000	500000	680000	660000	0
6149602	20000	0	20000	20000	40000	40000	0	0	20000	20000	0	40000	40000	40000	60000	40000	0	80000	0
1032257431	740000	960000	660000	2480000	2100000	760000	800000	560000	880000	1460000	640000	1500000	680000	660000	840000	760000	640000	660000	760000
1030884895	120000	60000	40000	40000	100000	100000	180000	60000	40000	60000	40000	60000	60000	40000	0	0	0	0	60000
1030186689	0	120000	380000	0	0	0	0	0	0	0	0	0	0	0	0	0	0	0	0
1025990970	500000	0	500000	1580000	600000	0	580000	460000	280000	800000	560000	920000	680000	540000	0	0	0	0	0
1030596923	700000	660000	40000	1060000	0	0	0	0	0	0	0	0	0	0	0	0	0	0	20000
1030759171	500000	460000	360000	640000	0	0	0	0	0	0	0	0	0	0	0	0	0	0	540000
1031694220	340000	120000	60000	440000	240000	180000	160000	0	20000	20000	100000	60000	80000	40000	100000	120000	140000	100000	180000
1021951597	680000	700000	580000	920000	780000	500000	660000	500000	600000	680000	520000	840000	620000	0	0	0	0	0	600000
1031423107	0	0	140000	700000	720000	0	240000	280000	360000	0	0	0	0	0	0	0	0	0	420000
1030054582	660000	420000	540000	840000	320000	180000	160000	280000	400000	460000	380000	580000	400000	340000	440000	320000	380000	280000	300000
1027006703	0	0	120000	1720000	0	0	0	0	0	0	0	0	0	0	0	0	0	0	260000
1027393885	60000	40000	40000	60000	0	60000	60000	40000	40000	60000	20000	40000	180000	20000	60000	60000	40000	40000	100000
1018578709	340000	320000	300000	500000	0	0	0	0	0	0	0	0	0	0	0	0	0	0	260000
1031887578	0	320000	600000	1280000	460000	40000	60000	0	0	0	0	0	0	0	0	0	0	0	420000
1026293672	740000	820000	300000	900000	0	0	0	0	0	0	0	0	0	0	0	0	0	0	40000
1028995312	0	0	340000	840000	660000	360000	340000	280000	340000	380000	300000	440000	340000	320000	60000	260000	0	0	620000
1031416675	700000	560000	300000	640000	0	40000	0	0	0	0	0	0	0	0	0	0	0	0	400000
1025793616	540000	740000	180000	620000	0	0	0	0	0	0	0	0	0	0	0	0	0	0	460000
1032891727	640000	680000	500000	920000	1100000	540000	620000	40000	0	0	0	0	0	0	0	0	0	0	600000
1031512641	0	280000	320000	720000	160000	180000	420000	400000	500000	560000	560000	860000	660000	480000	980000	500000	640000	620000	200000
1028274378	740000	700000	480000	920000	0	480000	0	0	0	0	0	0	0	0	0	0	0	0	520000
1018857406	540000	660000	560000	940000	0	0	0	0	0	0	0	0	0	0	0	0	0	0	600000
1018354152	360000	360000	320000	560000	580000	320000	260000	220000	260000	20000	0	0	0	0	0	0	0	0	300000
6227454	560000	540000	440000	740000	860000	440000	520000	380000	540000	600000	380000	660000	20000	0	0	0	0	0	500000
1032295101	1240000	980000	840000	1640000	1820000	760000	860000	760000	940000	1000000	780000	1200000	1040000	920000	1380000	1820000	720000	340000	960000
1023916657	0	0	300000	0	0	0	0	0	0	0	0	0	0	0	0	0	0	0	0
2659204	200000	160000	340000	20000	0	20000	0	0	0	0	0	0	0	0	0	0	0	0	220000
9673010	280000	440000	300000	500000	0	0	0	0	0	0	0	0	0	0	0	0	0	0	360000
11494221	680000	680000	640000	740000	700000	480000	20000	0	0	0	0	0	0	0	0	0	0	0	580000
1023410067	700000	660000	480000	980000	0	0	0	0	0	0	0	0	0	0	0	0	0	0	640000
1028117994	660000	20000	500000	920000	0	20000	0	0	0	0	0	0	0	0	0	0	0	0	600000
1026854204	760000	500000	380000	400000	0	20000	0	0	0	0	0	0	0	0	0	0	0	0	580000
1030832478	660000	680000	300000	980000	960000	380000	640000	80000	20000	0	0	0	0	0	0	0	0	0	540000
1031797787	680000	460000	260000	420000	580000	260000	320000	180000	240000	480000	300000	440000	340000	320000	340000	260000	340000	320000	300000
1029663399	0	0	20000	0	960000	300000	680000	520000	700000	680000	680000	1200000	1360000	600000	660000	500000	660000	700000	0
1032188188	840000	640000	740000	1300000	1080000	440000	760000	460000	620000	1060000	560000	860000	760000	820000	560000	880000	380000	360000	360000
3080553	1440000	1160000	840000	2360000	0	0	0	0	0	0	0	0	0	0	0	0	0	0	1080000
1030100418	620000	600000	520000	2320000	0	0	0	0	0	0	0	0	0	0	0	0	0	0	580000
8172185	420000	380000	260000	540000	0	0	0	0	0	0	0	0	0	0	0	0	0	0	440000
1031439168	520000	460000	20000	520000	340000	160000	360000	260000	400000	340000	20000	380000	320000	360000	460000	320000	20000	440000	440000
1026029273	800000	540000	420000	1020000	1040000	540000	560000	380000	500000	740000	480000	820000	780000	660000	620000	560000	760000	660000	600000
1020843631	20000	0	300000	460000	0	0	0	0	0	0	0	0	0	0	0	0	0	0	260000
1028714605	0	420000	520000	1160000	220000	80000	0	0	0	0	0	0	0	0	0	0	0	0	320000
10839438	0	0	260000	0	0	0	0	0	0	0	0	0	0	0	0	0	0	0	0
1021017255	440000	420000	340000	460000	540000	260000	340000	420000	280000	480000	60000	360000	0	0	340000	280000	160000	300000	300000
1031450961	680000	780000	480000	920000	0	0	0	0	0	0	0	0	0	0	0	0	0	0	620000
1029790431	840000	760000	340000	740000	720000	360000	460000	320000	420000	540000	320000	440000	400000	300000	0	0	0	0	460000
4742579	0	0	20000	0	0	0	0	0	0	0	0	0	0	0	0	0	0	0	0
11857055	380000	420000	20000	480000	580000	320000	340000	240000	180000	360000	280000	420000	340000	340000	520000	720000	600000	300000	380000
1031189780	20000	20000	40000	1020000	20000	0	0	0	0	0	0	0	0	0	0	0	0	0	540000
1032477804	540000	540000	260000	720000	480000	300000	0	0	360000	520000	200000	720000	0	0	540000	380000	440000	900000	360000
1032058641	380000	0	0	0	960000	360000	220000	120000	440000	220000	0	40000	0	0	120000	120000	0	500000	0
1028463013	480000	0	0	0	1140000	540000	600000	0	0	0	0	0	0	0	660000	0	640000	660000	0
1027947468	460000	300000	0	0	120000	240000	80000	0	0	400000	460000	420000	0	420000	480000	340000	440000	480000	0
1029339049	280000	80000	0	0	0	20000	180000	40000	520000	0	0	0	0	0	0	0	0	0	0
1030453001	0	0	0	0	560000	300000	320000	280000	320000	380000	0	140000	0	0	0	0	0	0	0
1031439646	20000	220000	0	0	0	40000	0	0	0	0	0	0	0	0	0	0	0	0	100000
1030834444	700000	600000	0	460000	980000	600000	280000	0	0	780000	520000	560000	0	0	0	0	0	0	560000
1028500920	0	0	0	0	840000	520000	400000	200000	620000	800000	260000	1100000	860000	0	0	0	0	0	0
1032040860	0	0	0	0	0	360000	1400000	780000	1120000	1320000	680000	1520000	1240000	740000	1700000	560000	860000	120000	0
1770517	100000	20000	0	0	780000	480000	580000	460000	580000	680000	0	20000	600000	560000	700000	520000	600000	620000	0
1029814313	0	0	0	0	0	20000	400000	340000	440000	500000	400000	560000	460000	420000	460000	360000	440000	440000	200000
1020677741	640000	0	0	0	20000	540000	0	0	0	0	0	0	0	0	0	0	0	0	0
1014769667	680000	1080000	0	0	680000	400000	360000	380000	400000	460000	80000	440000	380000	380000	400000	340000	380000	320000	20000
1020557915	700000	800000	0	880000	0	60000	0	100000	260000	680000	0	40000	0	0	0	0	0	0	580000
1029923090	0	0	0	20000	840000	420000	500000	380000	460000	0	0	0	0	0	0	0	0	0	0
1032615834	0	0	0	0	40000	40000	0	0	0	0	0	0	0	0	0	0	0	0	0
1021560644	0	40000	0	0	320000	100000	60000	0	0	0	0	0	0	0	0	0	0	0	580000
1028542586	0	100000	0	440000	880000	420000	440000	400000	480000	180000	0	0	0	0	0	0	0	0	0
1018228751	0	200000	0	300000	580000	280000	440000	280000	340000	40000	0	0	540000	620000	720000	320000	540000	360000	0
1032034004	720000	680000	0	0	640000	220000	540000	440000	520000	0	0	0	0	0	0	0	20000	20000	0
1030821316	700000	680000	0	420000	1060000	420000	0	0	0	760000	680000	0	40000	0	0	0	0	0	400000
1021525808	0	0	0	0	80000	100000	0	0	0	260000	240000	100000	300000	0	0	0	0	0	0
7845073	0	0	0	1080000	20000	100000	0	0	0	0	0	0	0	0	0	0	0	0	0
1024800302	720000	560000	0	20000	760000	460000	460000	320000	420000	460000	380000	580000	480000	400000	460000	360000	460000	460000	420000
1018394101	0	0	0	0	0	240000	0	0	0	140000	0	0	0	0	0	0	0	0	0
1106625	0	0	0	0	720000	440000	340000	280000	340000	320000	0	0	440000	360000	320000	360000	400000	380000	0
1027933536	0	0	0	0	20000	620000	0	0	0	0	0	0	0	0	0	0	0	0	0
10815710	0	20000	0	20000	60000	60000	60000	80000	200000	20000	20000	20000	40000	60000	0	0	0	0	0
1030068773	0	0	0	0	620000	340000	380000	320000	320000	400000	280000	360000	360000	340000	320000	260000	280000	320000	0
1023984372	0	0	0	0	0	20000	0	0	0	0	0	0	0	0	0	0	0	0	0
1025066447	20000	0	0	0	0	100000	0	0	0	0	0	0	0	0	0	0	0	0	0
1027284756	0	0	0	0	60000	620000	640000	480000	680000	0	0	0	0	0	0	0	0	0	0
11741963	0	0	0	0	360000	260000	180000	20000	140000	560000	240000	520000	400000	680000	400000	500000	420000	400000	0
1029359869	0	0	0	0	820000	420000	500000	380000	480000	380000	480000	700000	660000	560000	680000	460000	600000	560000	0
1023641915	0	0	0	0	0	20000	40000	0	0	700000	0	0	0	0	0	0	0	0	0
1032118066	0	0	0	0	0	320000	0	0	0	0	0	0	0	180000	0	0	0	0	0
1031914139	880000	860000	0	0	340000	40000	40000	520000	640000	640000	420000	740000	620000	640000	560000	520000	540000	480000	0
1031984459	0	0	0	0	640000	340000	100000	0	440000	20000	0	0	0	0	0	0	0	0	0
1020463224	0	0	0	0	1080000	580000	580000	480000	600000	640000	540000	640000	580000	540000	640000	500000	460000	620000	0
1030203068	720000	740000	0	0	1140000	500000	0	0	580000	660000	440000	780000	620000	600000	400000	480000	140000	340000	300000
6126819	1080000	580000	0	1000000	1180000	480000	420000	420000	660000	700000	260000	700000	0	0	0	0	0	0	600000
1030098228	20000	820000	0	500000	800000	220000	20000	0	20000	0	0	0	460000	440000	480000	400000	0	0	740000
1031618955	700000	700000	0	20000	1100000	560000	20000	0	0	0	0	0	0	0	0	0	0	0	580000
1030519336	0	0	0	0	0	0	0	0	220000	500000	300000	540000	820000	0	0	0	0	0	0
1023472752	0	0	0	0	0	0	0	0	580000	700000	540000	840000	640000	600000	400000	500000	0	0	0
1015207802	0	0	0	0	0	0	820000	480000	540000	700000	0	100000	0	0	0	380000	0	0	0
1031529367	0	0	0	0	0	0	0	0	0	640000	560000	620000	20000	0	0	0	0	0	0
1030076239	0	0	0	0	0	0	1100000	560000	720000	1340000	560000	940000	760000	660000	0	0	0	0	0
1019986162	0	0	0	0	260000	0	280000	260000	620000	560000	360000	560000	540000	540000	460000	460000	460000	520000	0
1024655402	0	0	0	0	60000	0	700000	640000	640000	680000	0	20000	0	0	0	0	0	0	0
1017042871	0	0	0	0	0	0	0	0	0	280000	0	1000000	0	0	0	0	0	0	0
1027261209	260000	0	0	0	0	0	0	260000	160000	300000	80000	440000	180000	300000	100000	280000	0	0	0
1324611	0	0	0	0	0	0	0	0	0	680000	0	220000	0	0	0	0	0	0	0
1032466781	0	0	0	0	0	0	0	0	0	700000	0	40000	0	0	0	0	0	0	0
1028052094	0	0	0	0	0	0	0	0	0	860000	280000	820000	0	0	0	0	0	0	0
1020997207	540000	580000	0	40000	0	0	360000	660000	620000	940000	0	20000	0	0	0	0	0	0	580000
1027501911	0	0	0	0	0	0	600000	520000	580000	700000	580000	900000	760000	700000	640000	480000	660000	680000	0
1031413462	280000	240000	0	360000	0	0	0	0	0	400000	0	920000	20000	380000	0	0	580000	680000	80000
1024432361	0	0	0	0	0	0	120000	0	0	0	0	20000	0	0	0	0	0	0	0
1027104661	0	0	0	0	0	0	0	0	0	0	580000	1160000	60000	0	0	0	0	0	0
1014360818	840000	680000	0	1080000	0	0	0	0	0	260000	200000	460000	400000	40000	0	20000	0	0	660000
1024655886	20000	0	0	0	0	0	0	0	0	400000	320000	520000	0	0	20000	0	0	0	0
1029517071	400000	520000	0	260000	240000	0	120000	600000	1040000	1200000	80000	860000	40000	80000	60000	60000	760000	100000	580000
9645106	680000	680000	0	620000	0	0	600000	460000	620000	700000	260000	840000	0	0	0	0	0	0	600000
1022750371	0	0	0	0	0	0	0	140000	280000	520000	300000	420000	340000	320000	0	0	260000	120000	0
1032684105	0	0	0	0	0	0	0	0	0	0	0	20000	0	0	0	0	0	0	0
5742652	500000	40000	0	0	0	0	0	0	180000	1180000	0	60000	280000	120000	760000	540000	1020000	1160000	0
1031857979	0	0	0	0	0	0	40000	40000	40000	500000	380000	700000	200000	220000	340000	300000	320000	220000	0
4494742	0	0	0	0	0	0	0	0	0	1000000	660000	960000	660000	540000	800000	600000	640000	620000	0
1031925085	0	0	0	0	0	0	0	0	0	620000	0	560000	0	0	0	0	0	0	0
1030914749	20000	0	0	0	0	0	0	0	0	0	0	0	0	0	0	0	0	0	0
1031324224	840000	680000	0	20000	0	0	0	0	0	0	0	0	0	0	0	0	0	0	1040000
1027838416	500000	460000	0	600000	0	0	0	0	0	0	0	0	0	0	0	0	0	0	400000
1031469471	20000	0	0	0	0	0	0	0	0	0	0	0	0	0	0	0	0	0	0
1026590478	160000	0	0	0	0	0	0	0	0	0	0	0	0	0	0	0	0	0	0
1024281123	20000	0	0	0	0	0	0	0	0	0	0	0	0	0	0	0	0	0	0
1031131262	700000	740000	0	80000	0	0	0	0	0	0	0	0	0	0	0	0	0	0	580000
1031231164	1600000	40000	0	0	0	0	0	0	0	0	0	0	0	0	0	0	0	0	0
1030494106	740000	0	0	0	0	0	0	0	0	0	0	0	0	0	0	0	0	0	0
1030552552	620000	1020000	0	0	0	0	0	0	0	0	0	0	0	0	0	0	0	0	20000
1031667141	900000	700000	0	980000	0	0	0	0	0	0	0	0	0	0	0	0	0	0	660000
1029377401	500000	900000	0	0	0	0	0	0	0	0	0	0	0	0	0	0	0	0	1000000
1032500447	560000	560000	0	180000	0	0	0	0	0	0	0	0	0	0	0	0	0	0	580000
10807011	660000	600000	0	0	0	0	0	0	0	0	0	0	0	0	0	0	0	0	0
1030889412	540000	20000	0	0	0	0	0	0	0	0	0	0	0	0	0	0	0	0	0
1026807749	20000	0	0	0	0	0	0	0	0	0	0	0	0	0	0	0	0	0	0
1027158037	740000	1020000	0	160000	0	0	0	0	0	0	0	0	0	0	0	0	0	0	640000
1031721683	660000	160000	0	0	0	0	0	0	0	0	0	0	0	0	0	0	0	0	0
1028816118	340000	0	0	0	0	0	0	0	0	0	0	0	0	0	0	0	0	0	0
1017805646	20000	0	0	0	0	0	0	0	0	0	0	0	0	0	0	0	0	0	0
1031295184	20000	0	0	0	0	0	0	0	0	0	0	0	0	0	0	0	0	0	0
1017938588	660000	720000	0	600000	0	0	0	0	0	0	0	0	0	0	0	0	0	0	600000
1031288698	200000	100000	0	0	0	0	0	0	0	0	0	0	0	0	0	0	0	0	100000
1029014919	500000	0	0	0	0	0	0	0	0	0	0	0	0	0	0	0	0	0	0
1139413	700000	0	0	0	0	0	0	0	0	0	0	0	0	0	0	0	0	0	0
12736108	260000	0	0	0	0	0	0	0	0	0	0	0	0	0	0	0	0	0	0
12625859	120000	0	0	0	0	0	0	0	0	0	0	0	0	0	0	0	0	0	0
1018218454	660000	680000	0	620000	0	0	0	0	0	0	0	0	0	0	0	0	0	0	600000
5132689	40000	0	0	0	0	0	0	0	0	0	0	0	0	0	0	0	0	0	0
1031548617	480000	0	0	0	0	0	0	0	0	0	0	0	0	0	0	0	0	0	0
4027496	560000	460000	0	0	0	0	0	0	0	0	0	0	0	0	0	0	0	0	0
1032314286	720000	660000	0	0	0	0	0	0	0	0	0	0	0	0	0	0	0	0	460000
1027891723	20000	0	0	0	0	0	0	0	0	0	0	0	0	0	0	0	0	0	0
1031567496	20000	0	0	0	0	0	0	0	0	0	0	0	0	0	0	0	0	0	0
1032820724	600000	820000	0	0	0	0	0	0	0	0	0	0	0	0	0	0	0	0	0
1031203229	740000	500000	0	0	0	0	0	0	0	0	0	0	0	0	0	0	0	0	0
1031199753	660000	340000	0	220000	0	0	0	0	0	0	0	0	0	0	0	0	0	0	0
1030713817	660000	680000	0	100000	0	0	0	0	0	0	0	0	0	0	0	0	0	0	600000
1024599045	460000	480000	0	0	0	0	0	0	0	0	0	0	0	0	0	0	0	0	20000
1032737075	620000	0	0	0	0	0	0	0	0	0	0	0	0	0	0	0	0	0	0
1014870381	180000	0	0	0	0	0	0	0	0	0	0	0	0	0	0	0	0	0	0
1031967710	620000	20000	0	0	0	0	0	0	0	0	0	0	0	0	0	0	0	0	0
1030432682	640000	680000	0	620000	0	0	0	0	0	0	0	0	0	0	0	0	0	0	600000
1032936605	820000	0	0	0	0	0	0	0	0	0	0	0	0	0	0	0	0	0	0
5159375	60000	0	0	0	0	0	0	0	0	0	0	0	0	0	0	0	0	0	0
1032613128	600000	440000	0	20000	0	0	0	0	0	0	0	0	0	0	0	0	0	0	480000
1032972212	20000	0	0	0	0	0	0	0	0	0	0	0	0	0	0	0	0	0	0
1030307568	480000	560000	0	720000	0	0	0	0	0	0	0	0	0	0	0	0	0	0	460000
11408287	20000	0	0	0	0	0	0	0	0	0	0	0	0	0	0	0	0	0	140000
1031499019	20000	0	0	0	0	0	0	0	0	0	0	0	0	0	0	0	0	0	0
1026992507	660000	40000	0	0	0	0	0	0	0	0	0	0	0	0	0	0	0	0	0
1031832447	400000	220000	0	0	0	0	0	0	0	0	0	0	0	0	0	0	0	0	40000
1031753382	20000	0	0	0	0	0	0	0	0	0	0	0	0	0	0	0	0	0	0
1021217571	180000	140000	0	0	0	0	0	0	0	0	0	0	0	0	0	0	0	0	0
2925256	20000	0	0	0	0	0	0	0	0	0	0	0	0	0	0	0	0	0	0
1026760722	300000	0	0	0	0	0	0	0	0	0	0	0	0	0	0	0	0	0	0
10762258	20000	0	0	0	0	0	0	0	0	0	0	0	0	0	0	0	0	0	0
1024071365	580000	40000	0	0	0	0	0	0	0	0	0	0	0	0	0	0	0	0	0
1029867309	660000	700000	0	0	0	0	0	0	0	0	0	0	0	0	0	0	0	0	0
1028169961	60000	0	0	420000	0	0	0	0	0	0	0	0	0	0	0	0	0	0	0
7921053	660000	740000	0	0	0	0	0	0	0	0	0	0	0	0	0	0	0	0	40000
1031731548	660000	680000	0	0	0	0	0	0	0	0	0	0	0	0	0	0	0	0	0
1027795352	660000	680000	0	0	0	0	0	0	0	0	0	0	0	0	0	0	0	0	300000
1032172391	680000	700000	0	0	0	0	0	0	0	0	0	0	0	0	0	0	0	0	20000
1028528913	680000	640000	0	0	0	0	0	0	0	0	0	0	0	0	0	0	0	0	20000
1015493037	60000	0	0	0	0	0	0	0	0	0	0	0	0	0	0	0	0	0	0
1029664780	340000	440000	0	740000	0	0	0	0	0	0	0	0	0	0	0	0	0	0	500000
1028979517	660000	0	0	0	0	0	0	0	0	0	0	0	0	0	0	0	0	0	0
1030963788	140000	0	0	0	0	0	0	0	0	0	0	0	0	0	0	0	0	0	0
1030074460	660000	0	0	0	0	0	0	0	0	0	0	0	0	0	0	0	0	0	0
1031261560	960000	1280000	0	880000	0	0	0	0	0	0	0	0	0	0	0	0	0	0	1040000
1029601884	480000	0	0	0	0	0	0	0	0	0	0	0	0	0	0	0	0	0	0
1030350830	440000	380000	0	0	0	0	320000	360000	480000	20000	0	0	0	0	440000	320000	0	0	0
1031480109	20000	0	0	0	0	0	0	0	0	0	0	0	0	0	0	0	0	0	0
1030510894	680000	20000	0	0	0	0	0	0	0	0	0	0	0	0	0	0	0	0	0
1021418312	20000	20000	0	0	0	0	0	0	0	0	0	0	0	0	0	0	0	0	0
1021113741	840000	820000	0	0	0	0	0	0	0	0	0	0	0	0	0	0	0	0	20000
1019067052	760000	0	0	0	0	0	0	0	0	0	0	0	0	0	0	0	0	0	0
1029803129	160000	0	0	0	0	0	0	0	0	0	0	0	0	0	0	0	0	0	0
1015932822	620000	580000	0	0	0	0	0	0	0	0	0	0	0	0	0	0	0	0	140000
1029255032	20000	0	0	0	0	0	0	0	0	0	0	0	0	0	0	0	0	0	0
1030261352	720000	980000	0	0	0	0	0	0	0	0	0	0	0	0	0	0	0	0	20000
1021260236	540000	0	0	0	0	0	0	0	0	0	0	0	0	0	0	0	0	0	0
1030706091	100000	0	0	0	0	0	0	0	0	0	0	0	0	0	0	0	0	0	0
1014946330	40000	0	0	0	0	0	0	0	0	0	0	0	0	0	0	0	0	0	0
1029665790	460000	0	0	0	0	0	0	0	0	0	0	0	0	0	0	0	0	0	0
1028306627	700000	660000	0	0	0	0	0	0	0	0	0	0	0	0	0	0	0	0	0
1030128116	20000	0	0	0	0	0	0	0	0	0	0	0	0	0	0	0	0	0	0
1018498947	660000	20000	0	0	0	0	0	0	0	0	0	0	0	0	0	0	0	0	0
1031750819	160000	0	0	0	0	0	0	0	0	0	0	0	0	0	0	0	0	0	0
1021944570	420000	0	0	0	0	0	0	0	0	0	0	0	0	0	0	0	0	0	0
1026470940	620000	460000	0	0	0	0	0	0	0	0	0	0	0	0	0	0	0	0	0
1030227185	200000	0	0	0	0	0	0	0	0	0	0	0	0	0	0	0	0	0	0
1031377243	20000	0	0	0	0	0	0	0	0	0	0	0	0	0	0	0	0	0	0
4660131	140000	140000	0	0	0	0	0	0	0	0	0	0	0	0	0	0	0	0	20000
1021563946	640000	40000	0	0	0	0	0	0	0	0	0	0	0	0	0	0	0	0	0
1022694690	380000	0	0	0	0	0	0	0	0	0	0	0	0	0	0	0	0	0	0
1027112038	40000	0	0	0	0	0	0	0	0	0	0	0	0	0	0	0	0	0	0
1028242743	640000	500000	0	0	0	0	0	0	0	0	0	0	0	0	0	0	0	0	0
1588362	500000	460000	0	0	0	0	0	0	0	0	0	0	0	0	0	0	0	0	200000
1014679286	640000	580000	0	0	0	0	0	0	0	0	0	0	0	0	0	0	0	0	480000
1031346361	20000	0	0	0	0	0	0	0	0	0	0	0	0	0	0	0	0	0	0
1020694093	680000	660000	0	300000	0	0	0	0	0	0	0	0	0	0	0	0	0	0	600000
7840869	660000	0	0	0	0	0	0	0	0	0	0	0	0	0	0	0	0	0	0
1376685	700000	700000	0	0	0	0	0	0	0	0	0	0	0	0	0	0	0	0	0
1030386179	660000	580000	0	0	0	0	0	0	0	0	0	0	0	0	0	0	0	0	0
1029540346	100000	100000	0	0	0	0	0	0	0	0	0	0	0	0	0	0	0	0	0
1025609245	180000	0	0	0	0	0	0	0	0	0	0	0	0	0	0	0	0	0	0
1024420160	620000	460000	0	0	0	0	0	0	0	0	0	0	0	0	0	0	0	0	20000
1032348120	660000	20000	0	0	0	0	0	0	0	0	0	0	0	0	0	0	0	0	0
1030696089	820000	680000	0	20000	0	0	0	0	0	0	0	0	0	0	0	0	0	0	580000
1029966551	500000	20000	0	0	0	0	0	0	0	0	0	0	0	0	0	0	0	0	0
1023902155	680000	20000	0	0	0	0	0	0	0	0	0	0	0	0	0	0	0	0	0
1030488820	820000	740000	0	0	0	0	0	0	0	0	0	0	0	0	0	0	0	0	0
1014279091	80000	0	0	0	0	0	0	0	0	0	0	0	0	0	0	0	0	0	0
7680126	480000	20000	0	0	0	0	0	0	0	0	0	0	0	0	0	0	0	0	0
1027256272	20000	0	0	0	0	0	0	0	0	0	0	0	0	0	0	0	0	0	0
1025892339	660000	800000	0	0	0	0	0	0	0	0	0	0	0	0	0	0	0	0	320000
1022722527	660000	0	0	0	0	0	0	0	0	0	0	0	0	0	0	0	0	0	0
1022724903	1180000	780000	0	2080000	0	0	0	0	0	0	0	0	0	0	0	0	0	0	1180000
1031293258	400000	0	0	0	0	0	0	0	0	0	0	0	0	0	0	0	0	0	0
1031292286	700000	580000	0	0	0	0	0	0	0	0	0	0	0	0	0	0	0	0	300000
1026193226	680000	540000	0	0	0	0	0	0	0	0	0	0	0	0	0	0	0	0	0
1023205636	560000	440000	0	0	0	0	0	0	0	0	0	0	0	0	0	0	0	0	20000
1016101770	20000	0	0	0	0	0	0	0	0	0	0	0	0	0	0	0	0	0	0
1017782819	640000	540000	0	40000	0	0	0	0	0	0	0	0	0	0	0	0	0	0	1020000
1032926700	220000	0	0	0	0	0	0	0	0	0	0	0	0	0	0	0	0	0	0
1030733825	300000	0	0	0	0	0	0	0	0	0	0	0	0	0	0	0	0	0	0
7400067	180000	140000	0	0	0	0	0	0	0	0	0	0	0	0	0	0	0	0	0
1032613123	720000	680000	0	160000	0	0	0	0	0	0	0	0	0	0	0	0	0	0	740000
1032477581	20000	0	0	0	0	0	0	0	0	0	0	0	0	0	0	0	0	0	0
6531070	460000	480000	0	0	0	0	0	0	0	0	0	0	0	0	0	0	0	0	0
1017091858	720000	760000	0	0	0	0	0	0	0	0	0	0	0	0	0	0	0	0	0
1030642631	760000	700000	0	0	0	0	0	0	0	0	0	0	0	0	0	0	0	0	40000
613220	480000	0	0	0	0	0	0	0	0	0	0	0	0	0	0	0	0	0	0
1030081232	600000	0	0	0	0	0	0	0	0	0	0	0	0	0	0	0	0	0	0
1030594392	580000	0	0	0	0	0	0	0	0	0	0	0	0	0	0	0	0	0	0
1032197625	780000	720000	0	1220000	0	0	0	0	0	0	0	0	0	0	0	0	0	0	540000
1196430	20000	0	0	0	0	0	0	0	0	0	0	0	0	0	0	0	0	0	0
1025337397	500000	0	0	0	0	0	0	0	0	0	0	0	0	0	0	0	0	0	0
1032129879	240000	0	0	0	0	0	0	0	0	0	0	0	0	0	0	0	0	0	0
2046066	20000	0	0	0	0	0	0	0	0	0	0	0	0	0	0	0	0	0	0
1026293508	360000	140000	0	0	0	0	0	0	0	0	0	0	0	0	0	0	0	0	280000
1029220105	20000	0	0	0	0	0	0	0	0	0	0	0	0	0	0	0	0	0	0
1031308989	640000	660000	0	1000000	0	0	0	0	0	0	0	0	0	0	0	0	0	0	580000
1031392704	560000	20000	0	0	0	0	0	0	0	0	0	0	0	0	0	0	0	0	0
1031757169	660000	640000	0	0	0	0	0	0	0	0	0	0	0	0	0	0	0	0	180000
1031529209	660000	0	0	0	0	0	0	0	0	0	0	0	0	0	0	0	0	0	0
1031633669	720000	0	0	0	0	0	0	0	0	0	0	0	0	0	0	0	0	0	0
1021161923	420000	0	0	0	0	0	0	0	0	0	0	0	0	0	0	0	0	0	0
1027755023	500000	460000	0	420000	0	0	0	0	0	0	0	0	0	0	0	0	0	0	420000
1031079270	760000	360000	0	0	0	0	0	0	0	0	0	0	0	0	0	0	0	0	0
1031255252	60000	0	0	0	0	0	0	0	0	0	0	0	0	0	0	0	0	0	0
1019899964	480000	40000	0	0	0	0	0	0	0	0	0	0	0	0	0	0	0	0	0
1031383670	1100000	640000	0	0	0	0	0	0	0	0	0	0	0	0	0	0	0	0	0
1018124939	680000	200000	0	0	0	0	0	0	0	0	0	0	0	0	0	0	0	0	0
1031287109	140000	0	0	0	0	0	0	0	0	0	0	0	0	0	0	0	0	0	0
1027869074	240000	0	0	0	0	0	0	0	0	0	0	0	0	0	0	0	0	0	0
1031444092	20000	0	0	0	0	0	0	0	0	0	0	0	0	0	0	0	0	0	0
1030241463	660000	420000	0	0	0	0	0	0	0	0	0	0	0	0	0	0	0	0	0
7837153	20000	0	0	0	0	0	0	0	0	0	0	0	0	0	0	0	0	0	0
1032203764	720000	660000	0	400000	0	0	0	0	0	0	0	0	0	0	0	0	0	0	580000
1025802196	200000	0	0	0	0	0	0	0	0	0	0	0	0	0	0	0	0	0	0
1283600	80000	0	0	0	0	0	0	0	0	0	0	0	0	0	0	0	0	0	0
1031358182	20000	0	0	0	0	0	0	0	0	0	0	0	0	0	0	0	0	0	0
1031571682	20000	0	0	0	0	0	0	0	0	0	0	0	0	0	0	0	0	0	0
1030837981	600000	540000	0	0	0	0	0	0	0	0	0	0	0	0	0	0	0	0	0
1751022	460000	460000	0	0	0	0	0	0	0	0	0	0	0	0	0	0	0	0	240000
1031426863	540000	0	0	0	0	0	0	0	0	0	0	0	0	0	0	0	0	0	0
533593	200000	0	0	80000	0	0	0	0	0	0	0	0	0	0	0	0	0	0	80000
1028549090	100000	0	0	0	0	0	0	0	0	0	0	0	0	0	0	0	0	0	0
1031750814	60000	0	0	0	0	0	0	0	0	0	0	0	0	0	0	0	0	0	0
6856030	20000	0	0	0	0	0	0	0	0	0	0	0	0	0	0	0	0	0	0
1031504860	680000	680000	0	0	0	0	0	0	0	0	0	0	0	0	0	0	0	0	0
1019446218	20000	0	0	0	0	0	200000	0	0	0	0	0	0	0	0	0	0	0	0
1030554758	360000	0	0	0	0	0	0	0	0	0	0	0	0	0	0	0	80000	380000	0
1029502667	440000	540000	0	0	0	0	0	0	0	0	0	0	0	0	0	0	0	0	460000
1031317673	300000	0	0	0	0	0	0	0	0	0	0	0	0	0	0	0	0	0	0
1031554324	780000	120000	0	0	0	0	0	0	0	0	0	0	0	0	0	0	0	0	0
1020262267	20000	0	0	0	0	0	0	0	0	0	0	0	0	0	0	0	0	0	0
1028695421	240000	300000	0	0	0	0	0	0	0	0	0	0	0	0	0	0	0	0	100000
1022793462	540000	480000	0	0	0	0	0	0	0	0	0	0	0	0	0	0	0	0	20000
1021424259	700000	720000	0	0	0	0	0	0	0	0	0	0	0	0	0	0	0	0	320000
1032866594	20000	20000	0	0	0	0	0	0	0	0	0	0	0	0	0	0	0	0	0
1028499591	580000	660000	0	0	0	0	0	0	0	0	0	0	0	0	0	0	0	0	20000
1031350197	860000	580000	0	0	0	0	0	0	0	0	0	0	0	0	0	0	0	0	0
1025816588	100000	500000	0	300000	0	0	0	0	0	0	0	0	0	0	0	0	0	0	600000
1025638296	140000	120000	0	0	0	0	0	0	0	0	0	0	0	0	0	0	0	0	20000
1031715550	40000	0	0	0	0	0	0	0	0	0	0	0	0	0	0	0	0	0	0
1025651372	20000	0	0	0	0	0	0	0	0	0	0	0	0	0	0	0	0	0	0
1031559431	760000	200000	0	0	0	0	0	0	0	0	0	0	0	0	0	0	0	0	0
1031392830	240000	20000	0	0	0	0	0	0	0	0	0	0	0	0	0	0	0	0	0
1031963025	140000	0	0	0	0	0	0	0	0	0	0	0	0	0	0	0	0	0	0
1031952762	140000	0	0	0	0	0	0	0	0	0	0	0	0	0	0	0	0	0	0
1032751506	700000	880000	0	0	0	0	0	0	0	0	0	0	0	0	0	0	0	0	0
1032214067	500000	0	0	0	0	0	0	0	0	0	0	0	0	0	0	0	0	0	0
1031580923	280000	0	0	0	0	0	0	0	0	0	0	0	0	0	0	0	0	0	0
1024264937	20000	0	0	0	0	0	0	0	0	0	0	0	0	0	0	0	0	0	0
1031620115	680000	40000	0	0	0	0	0	0	0	0	0	0	0	0	0	0	0	0	0
7304215	1120000	720000	0	100000	0	0	0	0	0	0	0	0	0	0	0	0	0	0	920000
1024623084	560000	740000	0	260000	0	0	0	0	0	0	0	0	0	0	0	0	0	0	520000
1017024245	180000	0	0	0	0	0	0	0	0	0	0	0	0	0	0	0	0	0	0
1031444771	80000	0	0	0	0	0	0	0	0	0	0	0	0	0	0	0	0	0	0
1031606687	840000	20000	0	0	0	0	0	0	0	0	0	0	0	0	0	0	0	0	0
10543986	680000	360000	0	0	0	0	0	0	0	0	0	0	0	0	0	0	0	0	0
1031536184	680000	560000	0	0	0	0	0	0	0	0	0	0	0	0	0	0	0	0	360000
1018313580	680000	40000	0	0	0	0	0	0	0	0	0	0	0	0	0	0	0	0	0
1031459555	140000	0	0	0	0	0	0	0	0	0	0	0	0	0	0	0	0	0	0
1032231752	740000	580000	0	0	0	0	0	0	0	0	0	0	0	0	0	0	0	0	0
1019832318	20000	0	0	0	0	0	0	0	0	0	0	0	0	0	0	0	0	0	20000
8159821	760000	0	0	340000	0	0	0	0	0	0	0	0	0	0	0	0	0	0	600000
1028984318	720000	140000	0	0	0	0	0	0	0	0	0	0	0	0	0	0	0	0	0
1031580603	640000	0	0	0	0	0	0	0	0	0	0	0	0	0	0	0	0	0	0
1028527307	500000	600000	0	200000	0	0	0	0	0	0	0	0	0	0	0	0	0	0	300000
1032591194	380000	20000	0	0	0	0	0	0	0	0	0	0	0	0	0	0	0	0	0
1028376938	40000	0	0	0	0	0	0	0	0	0	0	0	0	0	0	0	0	0	0
9519746	300000	0	0	0	0	0	0	0	0	0	0	0	0	0	0	0	0	0	0
1025228861	340000	0	0	0	0	0	0	0	0	0	0	0	0	0	0	0	0	0	0
1030774449	680000	660000	0	0	0	0	0	0	0	0	0	0	0	0	0	0	0	0	20000
1032178030	60000	0	0	0	0	0	0	0	0	0	0	0	0	0	0	0	0	0	0
2614190	180000	0	0	0	0	0	0	0	0	0	0	0	0	0	0	0	0	0	0
1031529990	640000	620000	0	0	0	0	0	0	0	0	0	0	0	0	0	0	0	0	0
1022322904	740000	180000	0	0	0	0	0	0	0	0	0	0	0	0	0	0	0	0	0
1022328388	20000	0	0	0	0	0	0	0	0	0	0	0	0	0	0	0	0	0	0
1032728800	320000	0	0	0	0	0	0	0	0	0	0	0	0	0	0	0	0	0	0
1030158452	300000	0	0	0	0	0	0	0	0	0	0	0	0	0	0	0	0	0	0
1030859625	20000	0	0	0	0	0	0	0	0	0	0	0	0	0	0	0	0	0	0
1028532727	480000	140000	0	0	0	0	0	0	0	0	0	0	0	0	0	0	0	0	0
1029845477	680000	20000	0	0	0	0	0	0	0	0	0	0	0	0	0	0	0	0	0
2274318	660000	140000	0	0	0	0	0	0	0	0	0	0	0	0	0	0	0	0	0
1024251222	140000	0	0	0	0	0	0	0	0	0	0	0	0	0	0	0	0	0	0
10939577	640000	0	0	0	0	0	0	0	0	0	0	0	0	0	0	0	0	0	0
1030311947	20000	20000	0	0	0	0	0	0	0	0	0	0	0	0	0	0	0	0	0
649125	80000	0	0	0	0	0	0	0	0	0	0	0	0	0	0	0	0	0	0
1031531487	100000	0	0	0	0	0	0	0	0	0	0	0	0	0	0	0	0	0	0
1029937532	120000	0	0	0	0	0	0	0	0	0	0	0	0	0	0	0	0	0	0
1022108939	780000	680000	0	20000	0	0	0	0	0	0	0	0	0	0	0	0	0	0	480000
1026745493	20000	0	0	0	0	0	0	0	0	0	0	0	0	0	0	0	0	0	0
1031458623	300000	0	0	0	0	0	0	0	0	0	0	0	0	0	0	0	0	0	0
1031329354	180000	0	0	0	0	0	0	0	0	0	0	0	0	0	0	0	0	0	0
11560011	540000	480000	0	320000	0	0	0	0	0	0	0	0	0	0	0	0	0	0	400000
1022792039	500000	0	0	0	0	0	0	0	0	0	0	0	0	0	0	0	0	0	0
1026218229	660000	640000	0	880000	0	0	0	0	0	0	0	0	0	0	0	0	0	0	20000
1031349372	700000	620000	0	0	0	0	0	0	0	0	0	0	0	0	0	0	0	0	0
1028499457	340000	380000	0	40000	0	0	0	0	0	0	0	0	0	0	0	0	0	0	360000
1025566695	260000	0	0	0	0	0	0	0	0	0	0	0	0	0	0	0	0	0	0
8227149	180000	40000	0	0	0	0	0	0	0	0	0	0	0	0	0	0	0	0	0
1016988749	360000	0	0	0	0	0	0	0	0	0	0	0	0	0	0	0	0	0	0
1032659737	680000	820000	0	40000	0	0	0	0	0	0	0	0	0	0	0	0	0	0	600000
1031284323	20000	0	0	0	0	0	0	0	0	0	0	0	0	0	0	0	0	0	0
1028808398	720000	700000	0	100000	0	0	0	0	0	0	0	0	0	0	0	0	0	0	540000
1020979049	80000	0	0	0	0	0	0	0	0	0	0	0	0	0	0	0	0	0	0
1032136140	40000	0	0	0	0	0	0	0	0	0	0	0	0	0	0	0	0	0	0
1017722867	260000	260000	0	0	0	0	0	0	0	0	0	0	0	0	0	0	0	0	0
1021546341	180000	0	0	0	0	0	0	0	0	0	0	0	0	0	0	0	0	0	0
919426	660000	460000	0	0	0	0	0	0	0	0	0	0	0	0	0	0	0	0	0
1026293022	660000	80000	0	0	0	0	0	0	0	0	0	0	0	0	0	0	0	0	0
8188000	660000	720000	0	1640000	0	0	0	0	0	0	0	0	0	0	0	0	0	0	600000
1028833028	720000	660000	0	0	0	0	0	0	0	0	0	0	0	0	0	0	0	0	0
7059389	520000	0	0	0	0	0	0	0	0	0	0	0	0	0	0	0	0	0	0
1027678042	420000	780000	0	0	0	0	0	0	0	0	0	0	0	0	0	0	0	0	0
1031566748	860000	140000	0	0	0	0	0	0	0	0	0	0	0	0	0	0	0	0	0
1032767283	180000	0	0	0	0	0	0	0	0	0	0	0	0	0	0	0	0	0	0
1031471129	20000	0	0	0	0	0	0	0	0	0	0	0	0	0	0	0	0	0	0
1025140901	420000	100000	0	0	0	0	0	0	0	0	0	0	0	0	0	0	0	0	0
10693664	680000	620000	0	640000	0	0	0	0	0	0	0	0	0	0	0	0	0	0	620000
1015276133	120000	360000	0	0	0	0	0	0	0	0	0	0	0	0	0	0	0	0	160000
1031274933	340000	180000	0	0	0	0	0	0	0	0	0	0	0	0	0	0	0	0	0
4646270	300000	0	0	0	0	0	0	0	0	0	0	0	0	0	0	0	0	0	0
1029444690	160000	0	0	0	0	0	0	0	0	0	0	0	0	0	0	0	0	0	0
1031480006	600000	260000	0	0	0	0	0	0	0	0	0	0	0	0	0	0	0	0	0
3086039	80000	0	0	0	0	0	0	0	0	0	0	0	0	0	0	0	0	0	0
1014531554	160000	0	0	0	0	0	0	0	0	0	0	0	0	0	0	0	0	0	0
1031369712	160000	0	0	0	0	0	0	0	0	0	0	0	0	0	0	0	0	0	0
10597311	40000	0	0	0	0	0	0	0	0	0	0	0	0	0	0	0	0	0	0
4480065	60000	0	0	0	0	0	0	0	0	0	0	0	0	0	0	0	0	0	0
1032720192	360000	460000	0	0	0	0	0	0	0	0	0	0	0	0	0	0	0	0	0
1027903722	700000	660000	0	0	0	0	0	0	0	0	0	0	0	0	0	0	0	0	40000
1029995512	500000	660000	0	0	0	0	0	0	0	0	0	0	0	0	0	0	0	0	280000
5435873	500000	300000	0	0	0	0	0	0	0	0	0	0	0	0	0	0	0	0	0
1022125525	120000	0	0	0	0	0	0	0	0	0	0	0	0	0	0	0	0	0	0
1031359310	460000	480000	0	0	0	0	0	0	0	0	0	0	0	0	0	0	0	0	20000
1026601051	940000	880000	0	0	0	0	0	0	0	0	0	0	0	0	0	0	0	0	0
1031878701	20000	0	0	0	0	0	0	0	0	0	0	0	0	0	0	0	0	0	0
5571486	80000	0	0	0	0	0	0	0	0	0	0	0	0	0	0	0	0	0	0
8218838	240000	0	0	0	0	0	0	0	0	0	0	0	0	0	0	0	0	0	0
1031901317	540000	800000	0	0	0	0	0	0	0	0	0	0	0	0	0	0	0	0	380000
1026965306	560000	620000	0	0	0	0	0	0	0	0	0	0	0	0	0	0	0	0	20000
1026785577	400000	340000	0	0	0	0	0	0	0	0	0	0	0	0	0	0	0	0	0
1027149806	140000	0	0	0	0	0	0	0	0	0	0	0	0	0	0	0	0	0	0
1032368362	20000	0	0	0	0	0	0	0	0	0	0	0	0	0	0	0	0	0	0
1024912393	680000	20000	0	0	0	0	0	0	0	0	0	0	0	0	0	0	0	0	0
1032193823	900000	180000	0	0	0	0	0	0	0	0	0	0	0	0	0	0	0	0	0
1031338832	60000	0	0	0	0	0	0	0	0	0	0	0	0	0	0	0	0	0	0
1028540312	420000	380000	0	0	0	0	0	0	0	0	0	0	0	0	0	0	0	0	0
1029548843	80000	0	0	0	0	0	0	0	0	0	0	0	0	0	0	0	0	0	0
1024732559	180000	0	0	0	0	0	0	0	0	0	0	0	0	0	0	0	0	0	0
1031971064	20000	0	0	0	0	0	0	0	0	0	0	0	0	0	0	0	0	0	0
1026881442	320000	0	0	0	0	0	0	0	0	0	0	0	0	0	0	0	0	0	0
1031294705	280000	0	0	0	0	0	0	0	0	0	0	0	0	0	0	0	0	0	0
1020642300	460000	0	0	0	0	0	0	0	0	0	0	0	0	0	0	0	0	0	0
1028231902	480000	1080000	0	0	0	0	0	0	0	0	0	0	0	0	460000	340000	660000	420000	0
10716298	480000	0	0	0	0	0	0	0	0	0	0	0	0	0	0	0	0	0	0
9787184	600000	0	0	0	0	0	0	0	0	0	0	0	0	0	0	0	0	0	0
7418543	680000	20000	0	0	0	0	0	0	0	0	0	0	0	0	0	0	0	0	0
1028335950	20000	0	0	0	0	0	0	0	0	0	0	0	0	0	0	0	0	0	0
1925465	60000	0	0	0	0	0	0	0	0	0	0	0	0	0	0	0	0	0	0
12084560	700000	620000	0	0	0	0	0	0	0	0	0	0	0	0	0	0	0	0	20000
1031319365	660000	660000	0	0	0	0	0	0	0	0	0	0	0	0	0	0	0	0	40000
1024479672	980000	20000	0	0	0	0	0	0	0	0	0	0	0	0	0	0	0	0	0
1023708828	720000	680000	0	0	0	0	0	0	0	0	0	0	0	0	0	0	0	0	0
1031409733	660000	160000	0	0	0	0	0	0	0	0	0	0	0	0	0	0	0	0	0
1020192275	280000	320000	0	0	0	0	0	0	0	0	0	0	0	0	0	0	0	0	20000
866205	20000	0	0	0	0	0	0	0	0	0	0	0	0	0	0	0	0	0	0
1023279788	600000	40000	0	0	0	0	0	0	0	0	0	0	0	0	0	0	0	0	0
1030426322	20000	60000	0	0	0	0	20000	0	20000	0	0	0	0	0	0	0	0	0	0
1022062239	120000	0	0	0	0	0	0	0	0	0	0	0	0	0	0	0	0	0	0
1032842498	840000	1020000	0	60000	0	0	0	0	0	0	0	0	0	0	0	0	0	0	980000
1032101351	80000	80000	0	0	0	0	40000	0	0	0	0	0	0	0	0	0	0	0	0
1031330372	120000	0	0	0	0	0	0	0	0	0	0	0	0	0	0	0	0	0	0
7855693	740000	400000	0	0	0	0	0	0	0	0	0	0	0	0	0	0	0	0	0
1021430817	460000	0	0	0	0	0	0	0	0	0	0	0	0	0	0	0	0	0	0
3571160	700000	340000	0	0	0	0	0	0	0	0	0	0	0	0	0	0	0	0	0
1024308793	640000	520000	0	0	0	0	0	0	0	0	0	0	0	0	0	0	0	0	20000
1021146466	580000	1240000	0	0	0	0	0	0	0	0	0	0	0	0	0	0	0	0	0
1033006376	660000	40000	0	0	0	0	0	0	0	0	0	0	0	0	0	0	0	0	0
7583606	1480000	800000	0	0	0	0	0	0	0	0	0	0	0	0	0	0	0	0	0
1031937050	320000	220000	0	0	0	0	0	0	0	0	0	0	0	0	0	0	0	0	60000
1031932703	660000	660000	0	900000	0	0	0	0	0	0	0	0	0	0	0	0	0	0	580000
1028433387	320000	260000	0	460000	0	0	0	0	0	0	0	0	0	0	0	0	0	0	360000
1032478732	20000	0	0	0	0	0	0	0	0	0	0	0	0	0	0	0	0	0	0
1030922433	60000	40000	0	0	0	0	0	0	0	0	0	0	0	0	0	0	0	0	20000
1028087599	20000	0	0	0	0	0	0	0	0	0	0	0	0	0	0	0	0	0	0
1017427944	20000	0	0	0	0	0	0	0	0	0	0	0	0	0	0	0	0	0	0
12439358	20000	0	0	0	0	0	0	0	0	0	0	0	0	0	0	0	0	0	0
1020550000	240000	340000	0	0	0	0	0	0	0	0	0	0	0	0	0	0	0	0	80000
7543332	660000	100000	0	0	0	0	0	0	0	0	0	0	0	0	0	0	0	0	0
1030762778	1400000	1620000	0	760000	0	0	0	0	0	0	0	0	0	0	0	0	0	0	1320000
1031586542	520000	120000	0	0	0	0	0	0	0	0	0	0	0	0	0	0	0	0	0
1030428942	60000	0	0	0	0	0	0	0	0	0	0	0	0	0	0	0	0	0	0
1031360580	40000	0	0	0	0	0	0	0	0	0	0	0	0	0	0	0	0	0	0
1032082782	100000	0	0	0	0	0	0	0	0	0	0	0	0	0	0	0	0	0	0
6770568	100000	240000	0	0	0	0	0	0	0	0	0	0	0	0	0	0	0	0	40000
1018784710	660000	700000	0	0	0	0	0	0	0	0	0	0	0	0	0	0	0	0	40000
1020116376	660000	140000	0	0	0	0	0	0	0	0	0	0	0	0	0	0	0	0	0
1028933225	660000	640000	0	0	0	0	0	0	0	0	0	0	680000	600000	0	0	0	0	0
1020760551	740000	840000	0	480000	0	0	0	0	0	0	0	0	0	0	0	0	0	0	740000
11569757	840000	0	0	0	0	0	0	0	0	0	0	0	0	0	0	0	0	0	0
1031858854	480000	0	0	0	0	0	0	0	0	0	0	0	0	0	0	0	0	0	0
1032981911	20000	0	0	0	0	0	0	0	0	0	0	0	0	0	0	0	0	0	0
1026333225	660000	680000	0	0	0	0	0	0	0	0	0	0	0	0	0	0	0	0	20000
1025492613	20000	0	0	0	0	0	0	0	0	0	0	0	0	0	0	0	0	0	0
1031497790	640000	660000	0	0	0	0	0	0	0	0	0	0	0	0	0	0	0	0	440000
1031284611	660000	40000	0	0	0	0	0	0	0	0	0	0	0	0	0	0	0	0	0
1015983497	20000	0	0	0	0	0	0	0	0	0	0	0	0	0	0	0	0	0	0
1016964176	620000	500000	0	0	0	0	0	0	0	0	0	0	0	0	0	0	0	0	0
1032698947	700000	1220000	0	0	0	0	0	0	0	0	0	0	0	0	0	0	0	0	480000
1027215285	360000	0	0	0	0	0	0	0	0	0	0	0	0	0	0	0	0	0	0
7023737	200000	0	0	0	0	0	0	0	0	0	0	0	0	0	0	0	0	0	0
1030882928	140000	20000	0	0	0	0	0	0	0	0	0	0	0	0	20000	0	0	0	0
2536726	240000	0	0	0	0	0	0	0	0	0	0	0	0	0	0	0	0	0	0
1031621492	620000	0	0	0	0	0	0	0	0	0	0	0	0	0	0	0	0	0	0
1025065718	680000	200000	0	0	0	0	0	0	0	0	0	0	0	0	0	0	0	0	0
1024764147	0	0	0	40000	0	0	0	0	0	0	0	0	0	0	0	0	0	0	20000
1031376682	0	0	0	940000	0	0	0	0	0	0	0	0	0	0	0	0	0	0	0
1019384700	0	140000	0	1020000	0	0	0	0	0	0	0	0	0	0	0	0	0	0	380000
1022946869	0	0	0	500000	0	0	0	0	0	0	0	0	0	0	0	0	0	0	0
1031071821	0	0	0	20000	0	0	0	0	0	0	0	0	0	0	0	0	0	0	0
1027819835	0	0	0	20000	0	0	0	0	0	0	0	0	0	0	0	0	0	0	0
1027829438	0	0	0	100000	0	0	0	0	0	0	0	0	0	0	0	0	0	0	20000
1029997873	0	0	0	20000	0	0	0	0	0	0	0	0	0	0	0	0	0	0	600000
1019687757	0	0	0	120000	0	0	0	0	0	0	0	0	0	0	0	0	0	0	0
1028403694	0	0	0	60000	0	0	0	0	0	0	0	0	0	0	0	0	0	0	0
1025655359	0	20000	0	840000	0	0	0	0	0	0	0	0	0	0	0	0	0	0	0
1032905625	0	0	0	180000	0	0	0	0	0	0	0	0	0	0	0	0	0	0	0
10572024	0	0	0	840000	0	0	0	0	0	320000	0	0	0	0	0	0	0	0	220000
11059243	0	0	0	720000	0	0	0	0	0	0	0	0	0	0	0	0	0	0	0
1016517890	0	320000	0	480000	0	0	0	0	0	0	0	0	0	0	0	0	0	0	0
1028261587	0	0	0	420000	0	0	0	0	0	0	0	0	0	0	0	0	0	0	560000
1030419602	0	0	0	480000	0	0	0	0	0	0	0	0	0	0	0	0	0	0	0
1106123	0	360000	0	500000	0	0	0	0	0	0	0	0	0	0	0	0	0	0	0
1015045817	0	0	0	20000	0	0	0	0	0	0	0	0	0	0	0	0	0	0	0
1020098692	0	0	0	540000	0	0	0	0	0	0	0	0	0	0	0	0	0	0	0
3400331	0	0	0	20000	0	0	0	0	0	0	0	0	0	0	60000	0	0	0	0
1018900528	0	0	0	300000	0	0	0	0	0	0	460000	0	660000	600000	720000	20000	740000	620000	0
1031451300	0	0	0	20000	40000	0	0	0	20000	0	0	0	0	0	760000	520000	720000	660000	0
1030417729	0	0	0	180000	0	0	0	0	0	0	0	0	0	0	0	0	0	0	0
2234775	0	0	0	20000	0	0	0	0	0	0	0	0	0	0	0	0	0	0	600000
1026715981	0	440000	0	920000	20000	0	0	0	0	0	0	0	380000	520000	1000000	600000	0	0	620000
1022310108	0	0	0	800000	0	0	0	0	0	0	0	0	0	0	0	0	0	0	540000
1031187544	0	0	0	360000	0	0	0	0	0	0	0	0	0	0	0	0	0	0	600000
1024527061	0	0	0	160000	0	0	0	0	0	0	0	0	0	0	0	0	40000	0	0
1018851719	0	560000	0	920000	0	0	0	0	0	0	0	0	0	0	0	0	0	0	0
1029475742	0	160000	0	20000	0	0	0	0	0	0	0	0	0	0	0	0	0	0	240000
1023642801	0	0	0	300000	0	0	0	0	0	0	0	0	0	0	0	0	0	0	40000
1020590276	0	0	0	20000	0	0	0	0	0	0	0	0	0	0	0	0	0	0	0
3058035	0	0	0	500000	340000	0	0	0	0	0	0	0	0	0	0	0	0	0	80000
1026475632	0	0	0	180000	0	0	0	0	0	0	100000	0	0	0	0	0	0	0	0
1032868006	0	0	0	620000	1220000	0	200000	0	0	0	0	0	0	0	0	0	0	0	300000
1025318071	0	0	0	0	60000	0	100000	60000	80000	0	0	0	0	0	0	0	0	0	0
1029976411	0	0	0	0	20000	0	0	0	20000	0	0	0	0	0	0	0	0	0	0
1022978220	0	0	0	0	0	0	0	0	20000	20000	0	0	0	0	0	0	0	0	0
1028428214	0	0	0	0	0	0	0	0	20000	0	0	0	0	0	0	0	0	0	0
1025240282	0	0	0	0	0	0	0	0	20000	0	0	0	0	0	0	0	0	0	0
1022468379	0	0	0	0	0	0	0	0	0	20000	0	0	0	0	0	0	0	0	0
8860866	0	0	0	0	0	0	0	0	0	180000	0	0	0	0	0	0	0	0	0
1032605711	0	0	0	0	0	0	0	0	0	20000	0	0	0	0	0	0	0	0	0
2283293	0	0	0	0	0	0	0	0	0	20000	0	0	0	0	0	0	0	0	0
1032655748	0	0	0	0	0	0	0	0	0	20000	0	0	0	0	0	0	0	0	0
1031219965	0	0	0	0	0	0	0	0	0	20000	0	0	0	0	540000	0	500000	660000	0
1030364878	0	0	0	0	0	0	0	0	0	160000	0	0	0	0	0	0	0	0	0
1015521411	0	0	0	0	0	0	0	0	0	360000	0	0	0	0	0	0	0	0	0
1032923810	0	500000	0	0	0	0	0	0	0	40000	0	0	0	0	0	0	0	0	200000
631355	0	0	0	0	0	0	0	0	0	40000	0	0	0	0	0	0	0	0	0
1021867620	0	0	0	0	0	0	0	0	0	100000	0	0	20000	0	0	0	60000	0	0
1031411253	0	0	0	0	0	0	0	0	0	0	60000	0	0	0	0	0	0	0	0
1029256098	0	0	0	0	0	0	0	0	0	0	520000	0	860000	0	0	0	0	0	0
2143264	0	0	0	0	0	0	0	0	0	0	40000	0	0	0	0	0	0	0	0
1032008794	0	0	0	0	0	0	0	0	0	0	160000	0	0	0	0	0	0	0	0
1032608455	0	560000	0	0	0	0	0	0	0	0	0	0	0	40000	0	0	0	0	0
11304633	0	0	0	0	0	0	0	0	0	0	0	0	460000	320000	0	0	0	0	0
1022760458	0	0	0	0	0	0	0	0	0	0	0	0	40000	20000	0	0	0	0	120000
1018876090	0	0	0	0	0	0	0	0	0	0	0	0	0	0	740000	460000	700000	620000	0
575665	0	40000	0	0	0	0	0	0	0	0	0	0	120000	0	0	20000	0	0	0
1031152550	0	0	0	0	0	0	0	0	0	0	0	0	0	0	0	20000	0	0	0
1030139662	0	0	0	0	0	0	0	0	0	0	0	0	0	0	0	40000	0	0	0
1025989560	0	0	0	0	0	0	0	0	0	0	0	0	0	0	0	0	40000	0	0
1032127744	0	20000	0	0	0	0	0	0	0	0	0	0	0	0	0	0	0	0	0
1029628629	0	300000	0	0	0	0	0	0	0	0	0	0	0	0	0	0	0	0	0
1030000773	0	40000	0	0	0	0	0	0	0	0	0	0	0	0	0	0	0	0	0
1032693632	0	20000	0	0	0	0	0	0	0	0	0	0	0	0	0	0	0	0	0
1030331454	0	120000	0	0	0	0	0	0	0	0	0	0	0	0	0	0	0	0	0
1030170606	0	520000	0	0	0	0	0	0	0	0	0	0	0	0	0	0	0	0	500000
1019382514	0	20000	0	0	0	0	0	0	0	0	0	0	0	0	0	0	0	0	0
1019208610	0	20000	0	0	0	0	0	0	0	0	0	0	0	0	0	0	0	0	0
1029405467	0	80000	0	0	0	0	0	0	0	0	0	0	0	0	0	0	0	0	0
1031237960	0	140000	0	0	0	0	0	0	0	0	0	0	0	0	0	0	0	0	0
1032096317	0	520000	0	0	0	0	0	0	0	0	0	0	0	0	0	0	0	0	0
1030294898	0	20000	0	0	0	0	0	0	0	0	0	0	0	0	0	0	0	0	0
1031398663	0	440000	0	0	0	0	0	0	0	0	0	0	0	0	0	0	0	0	0
1018033778	0	200000	0	0	0	0	0	0	0	0	0	0	0	0	0	0	0	0	0
1031687593	0	100000	0	0	0	0	0	0	0	0	0	0	0	0	0	0	0	0	0
7579322	0	620000	0	0	0	0	0	0	0	0	0	0	0	0	0	0	0	0	0
1015527222	0	40000	0	0	0	0	0	0	0	0	0	0	0	0	0	0	0	0	0
1014512821	0	20000	0	0	0	0	0	0	0	0	0	0	0	0	0	0	0	0	0
1031525930	0	20000	0	0	0	0	0	0	0	0	0	0	0	0	0	0	0	0	0
1018902363	0	20000	0	0	0	0	0	0	0	0	0	0	0	0	0	0	0	0	0
1031457554	0	320000	0	0	0	0	0	0	0	0	0	0	0	0	0	0	0	0	0
598504	0	20000	0	0	0	0	0	0	0	0	0	0	0	0	20000	0	0	0	0
1021082646	0	160000	0	0	0	0	0	0	0	0	0	0	0	0	0	0	0	0	0
1031233852	0	620000	0	0	0	0	0	0	0	0	0	0	0	0	0	0	0	0	0
1024756348	0	80000	0	0	0	0	0	0	0	0	0	0	0	0	0	0	0	0	0
1028001349	0	20000	0	0	0	0	0	0	0	0	0	0	0	0	0	0	0	0	0
1025920445	0	40000	0	0	0	0	0	0	0	0	0	0	0	0	0	0	0	0	0
4905578	0	20000	0	0	0	0	0	0	0	0	0	0	0	0	0	0	0	0	0
1021169244	0	20000	0	0	0	0	0	0	0	0	0	0	0	0	0	0	0	0	0
1032291077	0	40000	0	0	0	0	0	0	0	0	0	0	0	0	0	0	0	0	0
1029280933	0	20000	0	0	0	0	0	0	0	0	0	0	0	0	20000	0	0	0	0
1021322725	0	20000	0	0	0	0	0	0	0	0	0	0	0	0	0	0	0	0	420000
1031443996	0	100000	0	0	0	0	0	0	0	0	0	0	0	0	0	0	0	0	0
1015196546	0	20000	0	0	0	0	0	0	0	0	0	0	0	0	0	0	0	0	0
1014281441	0	20000	0	0	0	0	0	0	0	0	0	0	0	0	0	0	0	0	0
1020908471	0	160000	0	0	0	0	0	0	0	0	0	0	0	0	0	0	0	0	0
1032631228	0	600000	0	0	0	0	0	0	0	0	0	0	0	0	0	0	0	0	0
1027459361	0	20000	0	0	0	0	0	0	0	0	0	0	0	0	0	0	0	0	0
1019460417	0	0	0	0	0	0	0	0	0	0	0	0	0	0	0	0	0	0	120000
1028489601	0	0	0	0	0	0	0	0	0	0	0	0	0	0	0	0	0	0	20000
470460	0	0	0	0	0	0	0	0	0	0	0	0	0	0	0	0	0	0	320000
1021618932	0	0	0	0	0	0	0	0	0	0	0	0	0	0	0	0	0	0	20000
1031572414	0	0	0	0	0	0	0	0	0	0	0	0	0	0	0	0	0	0	40000
1030570358	0	0	0	0	0	0	0	0	0	0	0	0	0	0	0	0	0	0	20000
1030728595	0	0	0	0	0	0	0	0	0	0	0	0	0	0	0	0	0	0	520000
1028090229	0	0	0	0	0	0	0	0	0	0	0	0	0	0	0	0	0	0	520000
1028233402	0	0	0	0	0	0	0	0	0	0	0	0	0	0	0	0	0	0	80000
1032421288	0	0	0	0	0	0	0	0	0	0	0	0	0	0	0	0	0	0	160000
1028056889	0	0	0	0	0	0	0	0	0	0	0	0	0	0	0	0	0	0	340000
1030408131	0	0	0	0	0	0	0	0	0	0	0	0	0	0	0	0	0	0	320000
1025258101	0	0	0	0	0	0	0	0	0	0	0	0	0	0	0	0	0	0	320000
1015400708	0	0	0	0	0	0	0	0	0	0	0	0	0	0	0	0	0	0	160000
1029854278	0	0	0	0	0	0	0	0	0	0	0	0	0	0	0	0	0	0	140000
6128157	0	0	0	0	0	0	0	0	0	0	0	0	0	0	0	0	0	0	20000
1031858381	0	0	0	0	0	0	0	0	0	0	0	0	0	0	0	0	0	0	80000
1032512947	0	0	0	0	0	0	0	0	0	0	0	0	0	0	0	0	0	0	380000
1017152881	0	0	0	0	1040000	0	560000	0	0	0	0	0	20000	0	0	0	0	0	0
1030556641	0	0	0	0	20000	0	0	0	0	0	0	0	0	0	0	0	0	0	0
1028864386	0	0	0	0	80000	0	0	0	0	0	0	0	0	0	0	0	0	0	0
1031430596	0	0	0	0	820000	0	200000	0	0	0	0	0	0	0	0	0	0	0	0
1028814262	0	0	0	0	0	0	0	0	0	0	0	0	20000	0	0	0	0	0	0
1030472447	0	0	0	0	0	0	0	0	0	0	0	0	0	0	20000	0	0	0	0
9846063	0	0	0	0	0	0	0	0	0	0	0	0	0	0	20000	0	0	0	0
923195	0	0	0	0	0	0	0	0	0	0	0	0	0	0	0	0	0	20000	0
1028650066	0	0	0	0	0	0	0	0	0	0	0	0	0	0	0	0	0	20000	0
