# Supplementary material for: A MOOC Video Viewing Behavior Analysis Algorithm
Source: Hindawi journal article supplement (doi:10.1155/2018/7560805), 2018-10-16
Supplement: f1 [file 7560805.f1.zip › Game Theory.xlsx]

## Sheet: 1002223009
标号	1	2	3	4	5	6	7	8	9	10	11	12	13	14	15	16	17	18	19	20	21	22	23	24	25	26	27	28	29	30	31	32	33	34	35	36	37	38
视频ID	1253007	1262010	1262011	1262012	1262015	1262016	1262017	1262018	1263006	1263007	1263008	1263009	1263010	1263011	1263012	1264003	1264005	1264006	1264007	1264008	1265003	1265005	1265006	1265007	1272002	1273001	1274001	1274002	1275001	1284008	1285012	1286012	1286013	1286014	1287009	1287011	1287021	1297137
视频时长	234000	1335000	1341000	2205000	1209000	1893000	744000	1172000	1480000	1128000	1410000	1650000	1843000	2212000	2009000	1444000	1447000	947000	1010000	2181000	1460000	1953000	1131000	2069000	1692000	2393000	1799000	2314000	2007000	1277000	1031000	1373000	1253000	1994000	2138000	812000	1245000	1540000
1029314077	260000	1220000	1120000	2120000	0	0	0	0	1060000	0	0	0	0	0	0	1520000	0	0	0	0	1440000	0	0	0	0	0	0	0	0	0	0	0	0	0	0	0	0	0
1032424907	260000	1380000	1380000	1760000	1240000	0	0	0	0	0	0	0	0	0	0	0	1480000	620000	1040000	0	1120000	680000	1160000	0	0	0	0	0	0	1300000	1060000	0	1280000	2020000	0	840000	0	0
920407	0	1380000	1100000	0	0	560000	0	0	0	460000	0	1680000	420000	0	0	0	1480000	0	0	0	1560000	0	0	0	1740000	0	1460000	40000	0	0	880000	0	0	840000	0	0	0	0
1030135018	0	660000	220000	0	0	0	0	0	0	0	0	0	0	0	0	0	0	0	0	0	360000	0	0	0	0	0	0	0	0	0	0	0	0	0	0	0	0	0
1032139038	0	1400000	1380000	2240000	0	0	0	0	1540000	0	0	0	0	80000	0	1500000	0	0	0	0	1520000	0	0	0	0	0	0	0	0	0	0	0	0	0	0	0	0	0
1027770990	140000	540000	20000	0	0	0	0	0	0	0	0	0	0	800000	0	0	0	0	0	0	1140000	0	0	0	0	0	0	0	0	0	0	0	0	0	0	0	0	0
1029195322	260000	1040000	1280000	2140000	800000	1340000	0	0	1160000	860000	1080000	1200000	1340000	1680000	0	1620000	1060000	0	0	0	1340000	1620000	40000	0	0	0	0	0	0	940000	720000	1040000	860000	1400000	1860000	920000	860000	1200000
1030900261	0	0	1360000	2240000	0	0	0	0	1520000	40000	740000	0	0	2480000	0	1480000	0	0	0	0	0	0	0	0	0	0	0	0	0	0	0	0	0	0	0	0	0	2160000
11917791	300000	1720000	1400000	2280000	0	0	0	0	1580000	0	1540000	0	0	2300000	0	1660000	0	0	0	0	2100000	0	0	0	0	0	0	0	0	0	0	0	0	0	0	0	0	460000
1021097228	0	2040000	1380000	2240000	0	0	0	0	1060000	0	0	0	0	0	0	1500000	0	0	0	0	1720000	0	0	0	0	0	0	0	0	0	0	0	0	0	0	0	0	0
1030967314	240000	1400000	1460000	2120000	1240000	0	760000	1180000	1560000	920000	800000	1680000	740000	2220000	0	1540000	1260000	820000	0	2200000	1560000	2160000	0	0	0	0	20000	2320000	2020000	0	0	0	0	0	240000	0	0	0
11919867	540000	2320000	2780000	1960000	0	0	0	0	1420000	1260000	2720000	0	0	3860000	0	1380000	0	0	0	0	1300000	0	0	0	0	0	0	0	0	0	0	1380000	0	0	2160000	0	0	2140000
1031792920	320000	820000	760000	1320000	1240000	1700000	780000	1200000	0	1080000	820000	1500000	1280000	2120000	2080000	960000	1400000	980000	1040000	2160000	1080000	2020000	1120000	0	0	500000	0	2220000	2020000	1280000	1060000	1400000	1260000	2000000	2240000	660000	660000	40000
1018429511	180000	900000	920000	2500000	0	0	0	0	0	0	0	0	0	0	0	240000	0	0	0	0	1260000	0	0	0	0	0	0	0	0	0	0	0	0	0	0	0	0	0
1029783008	120000	1440000	1060000	0	0	0	0	0	0	0	0	0	0	0	0	0	0	0	0	0	1520000	0	0	0	0	0	0	0	0	0	0	0	0	0	0	0	0	0
1029167293	0	100000	140000	100000	60000	0	0	0	60000	60000	140000	0	0	180000	0	60000	40000	0	0	0	620000	0	0	0	0	0	0	0	0	0	0	80000	0	0	60000	0	0	40000
1032446954	160000	60000	560000	0	0	0	0	0	0	0	0	0	0	0	0	0	0	0	0	0	800000	0	0	0	0	0	0	0	0	0	0	0	0	0	0	0	0	0
10365931	320000	0	1040000	2440000	0	0	0	0	1320000	0	0	0	0	0	0	1780000	0	0	0	0	1080000	0	0	0	0	0	0	0	0	0	0	0	0	0	0	0	0	0
1032355250	0	2440000	2860000	4540000	0	0	0	0	2360000	0	0	0	0	140000	0	3320000	0	0	0	0	1060000	0	0	0	0	0	0	0	0	0	0	0	0	0	0	0	0	0
1032806613	260000	1420000	1380000	560000	0	0	0	0	0	680000	760000	340000	0	1440000	0	0	0	0	0	0	1700000	1200000	0	0	0	0	0	0	0	0	0	0	0	0	340000	0	0	960000
1031124886	260000	1420000	1380000	2620000	1540000	1920000	820000	2440000	1520000	1740000	1460000	1680000	1960000	2240000	0	1520000	2640000	1060000	1080000	2320000	1540000	2020000	1260000	0	1100000	0	1820000	2340000	2040000	1300000	1060000	1840000	1320000	2180000	3700000	820000	1320000	1560000
1029147178	120000	760000	560000	1260000	0	0	0	0	1020000	0	0	0	0	140000	0	1000000	0	0	0	0	880000	0	0	0	0	0	0	0	0	0	0	0	0	0	0	0	0	0
1030593018	140000	1480000	360000	2480000	620000	0	0	0	1580000	1080000	1140000	0	0	1960000	0	1400000	720000	0	0	0	1700000	240000	0	0	1760000	0	1840000	2300000	0	0	0	720000	0	0	1820000	0	0	880000
1020622621	240000	1360000	1380000	2240000	3740000	0	0	0	760000	1800000	2120000	0	0	400000	0	1600000	2980000	0	0	0	1500000	1280000	0	0	0	0	0	0	0	0	0	1400000	0	0	6200000	0	0	1560000
1026456633	280000	1480000	1420000	20000	0	0	0	0	0	0	0	0	0	0	0	0	0	0	0	0	1520000	0	0	0	0	0	0	0	0	0	0	0	0	0	0	0	0	0
1029786722	240000	1080000	1020000	1460000	0	0	0	0	860000	0	40000	0	0	2500000	0	880000	0	0	0	0	1100000	0	0	0	0	0	0	0	0	0	0	0	0	0	0	0	0	0
11941350	260000	940000	1380000	2240000	1240000	20000	20000	1220000	1520000	1160000	60000	40000	1880000	2240000	2000000	1480000	1480000	0	0	2220000	1520000	280000	0	1780000	1720000	2400000	1560000	2320000	2080000	1300000	1060000	1400000	1280000	1320000	2160000	840000	1260000	0
1019683248	280000	1360000	1400000	2360000	0	0	0	0	1560000	980000	300000	0	0	2680000	0	1680000	0	0	0	0	1580000	0	0	0	0	0	0	0	0	0	0	520000	0	0	300000	0	0	40000
1028583942	260000	1600000	1340000	2360000	0	0	0	0	0	0	0	0	0	0	0	0	0	0	0	0	1500000	0	0	0	0	0	0	0	0	0	0	0	0	0	0	0	0	0
1028937422	200000	980000	1020000	1860000	0	0	0	0	1520000	0	0	0	0	0	0	1540000	0	0	0	0	1380000	0	0	0	0	0	0	0	0	0	0	0	0	0	0	0	0	0
1027647904	0	1240000	1100000	0	0	0	0	0	0	0	0	0	0	0	0	0	0	0	0	0	1500000	0	0	0	0	0	0	0	0	0	0	0	0	0	0	0	0	0
4804936	0	0	780000	2340000	0	0	0	0	1540000	0	0	0	0	20000	0	1580000	0	0	0	0	20000	0	0	0	0	0	0	0	0	0	0	0	0	0	0	0	0	0
1030098443	20000	1380000	1540000	2100000	0	0	0	0	2340000	1040000	380000	0	0	2360000	0	1440000	0	0	0	0	1140000	0	0	0	0	0	0	0	0	0	0	0	0	0	0	0	0	1600000
1028988752	0	1520000	1360000	1600000	2200000	2360000	0	0	1780000	500000	1300000	1840000	2000000	2080000	0	2040000	1760000	0	0	0	1880000	2220000	0	0	0	0	0	0	0	1580000	0	2400000	820000	0	4220000	0	1540000	960000
1022485644	0	1820000	460000	0	0	0	0	0	0	0	0	0	0	0	0	0	0	0	0	0	2000000	0	0	0	0	0	0	0	0	0	0	0	0	0	0	0	0	0
1024188206	0	1520000	1380000	2240000	0	0	0	0	0	0	0	0	0	0	0	1160000	0	0	0	0	1560000	0	0	60000	0	0	0	0	0	0	0	0	0	0	0	0	0	0
1030776776	280000	1360000	1500000	2260000	920000	0	600000	900000	0	420000	540000	0	0	2080000	0	1580000	20000	360000	0	1860000	1540000	0	0	0	0	0	0	0	320000	0	0	1240000	0	0	1560000	0	0	480000
1024160336	260000	1500000	1680000	2500000	0	0	0	0	1700000	0	0	0	0	0	0	1560000	0	0	0	0	1740000	0	0	0	0	0	0	0	0	0	0	0	0	0	0	0	0	0
7164613	0	1580000	1400000	2480000	0	0	0	0	0	0	1040000	0	0	1900000	0	20000	0	0	0	0	780000	0	0	0	0	0	0	0	0	0	0	0	0	0	0	0	0	1480000
1027628752	40000	1260000	1320000	1920000	0	0	0	0	1380000	220000	1820000	0	0	2120000	0	1340000	0	0	0	0	1400000	0	0	0	0	0	0	0	0	0	0	0	0	0	0	0	0	1380000
6096924	120000	480000	340000	60000	0	0	0	0	0	60000	540000	0	0	1260000	0	0	0	0	0	0	560000	0	0	0	0	0	0	0	0	0	0	0	0	0	0	0	0	1060000
1021847063	240000	1700000	1740000	2140000	1240000	1980000	800000	240000	1560000	3060000	3460000	1460000	1780000	4840000	0	1360000	920000	980000	1040000	0	1560000	1660000	1180000	0	0	0	0	0	0	1320000	1100000	1380000	1280000	2040000	3540000	840000	1580000	3240000
1029479907	260000	1380000	1380000	2300000	1280000	2000000	0	0	1560000	1180000	1800000	1720000	1600000	2240000	0	1500000	1520000	0	0	0	1520000	2000000	0	0	0	0	0	0	0	1300000	1080000	1420000	1280000	1500000	2320000	900000	340000	1600000
1020024063	0	1500000	1580000	1800000	1240000	80000	1180000	1220000	1560000	0	1860000	2400000	2440000	2400000	760000	1100000	420000	1320000	1120000	3100000	1080000	2720000	1220000	1940000	1900000	2320000	1980000	2780000	2040000	1520000	920000	1340000	1460000	2500000	0	860000	2180000	1700000
1031605280	280000	860000	1300000	1160000	1240000	0	0	0	1720000	1300000	1400000	0	0	60000	0	1520000	60000	0	0	0	1500000	0	0	0	0	0	0	0	0	0	0	1420000	0	0	2260000	0	0	280000
1029131926	200000	920000	1140000	1500000	0	0	0	0	1260000	0	0	0	0	1080000	0	1120000	0	0	0	0	1060000	0	0	0	0	0	0	0	0	0	0	0	0	0	0	0	0	0
1016805647	180000	1100000	1220000	1840000	860000	0	0	0	1040000	840000	0	0	0	20000	0	1080000	1080000	0	0	0	1120000	0	0	0	0	0	0	0	0	0	0	1060000	0	0	1760000	0	0	0
4820989	240000	1120000	1100000	1200000	500000	460000	840000	1700000	1600000	300000	1020000	500000	860000	1960000	2400000	1280000	540000	860000	1040000	2660000	1380000	1160000	1000000	1480000	780000	1700000	1140000	1560000	820000	1060000	740000	320000	640000	1560000	880000	560000	1160000	1380000
1032078630	160000	1020000	380000	0	0	0	0	0	0	0	0	0	0	0	0	0	0	0	0	0	1220000	0	0	0	0	0	0	0	0	0	0	0	0	0	0	0	0	0
1020280742	60000	760000	60000	1920000	1020000	0	0	0	1740000	0	1240000	0	0	2000000	0	1700000	1340000	0	0	0	980000	0	0	0	0	0	0	0	0	920000	1060000	1160000	1360000	1780000	0	600000	960000	1380000
1022591828	260000	1640000	1380000	2060000	0	0	0	0	0	0	720000	0	0	2280000	0	0	0	0	0	0	1500000	0	0	0	0	0	0	0	0	0	0	0	0	0	0	0	0	0
8014939	260000	1240000	1480000	2380000	880000	0	700000	980000	1360000	1180000	1200000	0	0	1880000	0	1560000	1520000	780000	900000	1860000	1300000	800000	1060000	0	720000	0	680000	520000	1360000	0	0	1220000	0	20000	1780000	0	0	1520000
1016827937	0	0	1380000	60000	0	0	0	0	0	0	0	0	0	0	0	0	0	0	0	0	0	0	0	0	0	0	0	0	0	0	0	0	0	0	0	0	0	0
1027724607	100000	1460000	1140000	1860000	1200000	0	0	0	0	780000	1160000	0	0	1680000	0	1040000	1520000	0	0	0	1480000	1620000	0	0	0	0	0	0	0	0	0	1560000	0	0	1800000	0	0	1280000
1024465240	360000	1400000	1380000	2340000	0	1120000	0	0	0	1160000	1440000	1700000	2020000	2080000	0	280000	0	0	0	0	1420000	1340000	0	0	0	0	0	0	0	0	0	0	0	0	1180000	0	0	1660000
1016833709	0	1180000	1140000	1880000	0	0	0	0	620000	0	980000	0	0	1800000	0	1120000	0	0	0	0	1180000	0	0	0	0	0	0	0	0	0	0	0	0	0	0	0	0	380000
12066135	180000	960000	1100000	60000	0	0	0	0	0	0	0	0	0	0	0	0	0	0	0	0	1040000	0	0	0	0	0	0	0	0	0	0	0	0	0	0	0	0	0
1031505863	260000	1580000	1380000	2040000	0	0	0	0	0	0	0	0	0	0	0	680000	0	0	0	0	1540000	0	0	0	0	0	0	0	0	0	0	0	0	0	0	0	0	0
1029434913	0	1520000	1400000	2280000	1280000	1660000	0	0	1540000	1960000	1400000	1640000	920000	2220000	0	1500000	1500000	0	0	0	1460000	2020000	0	0	0	0	0	0	0	0	0	2060000	0	0	2120000	0	740000	1600000
1025275237	220000	1120000	1160000	1920000	0	0	520000	820000	1260000	960000	1160000	0	0	1840000	0	1180000	0	840000	100000	1520000	1260000	0	0	0	0	0	1160000	1580000	1400000	0	0	60000	0	0	2740000	0	0	1300000
1027288307	0	0	600000	2420000	1260000	2040000	0	20000	1620000	1240000	1460000	1780000	1940000	2320000	0	1500000	1520000	0	0	0	20000	2080000	180000	0	0	0	20000	600000	2080000	1300000	1120000	1440000	1300000	2180000	2180000	900000	540000	1500000
11294823	720000	960000	680000	0	0	0	0	0	0	0	0	0	0	0	0	0	0	0	0	0	1180000	0	0	0	0	0	0	0	0	0	0	0	0	0	0	0	0	0
1031751109	0	1360000	800000	0	0	0	0	0	0	0	0	0	0	0	0	0	0	0	0	0	1160000	0	0	0	0	0	0	0	0	0	0	0	0	0	0	0	0	0
1030177210	200000	1400000	1200000	3320000	460000	0	0	0	1180000	600000	740000	0	0	1000000	0	1500000	720000	0	0	0	1340000	360000	0	0	0	0	0	0	0	0	0	720000	0	0	1040000	0	0	780000
1031148664	0	1380000	1420000	0	0	0	0	0	0	0	0	0	0	0	0	0	0	0	0	0	1520000	0	0	0	0	0	0	0	0	0	0	0	0	0	0	0	0	0
1029681647	20000	1900000	1240000	760000	0	0	0	0	0	0	0	0	0	0	0	540000	0	0	0	0	780000	0	0	0	0	0	0	0	0	0	0	0	0	0	0	0	0	0
1030432278	200000	1560000	520000	20000	0	0	0	0	0	0	40000	0	0	2220000	0	20000	0	0	0	0	1620000	0	0	0	0	0	0	0	0	0	0	0	0	0	20000	0	0	0
1024825794	0	1620000	1460000	2480000	1240000	0	0	0	2020000	1160000	0	1720000	1520000	2400000	0	1720000	1520000	0	0	0	1700000	2020000	0	0	0	0	0	0	0	0	0	1420000	0	0	2300000	0	0	0
1030403784	0	1760000	740000	0	0	0	0	0	0	0	0	0	0	0	0	0	0	0	0	0	0	0	0	0	0	0	0	0	0	0	0	0	0	0	0	0	0	0
8281740	40000	1040000	1100000	520000	0	0	0	0	0	0	0	0	0	0	0	0	0	0	0	0	1280000	0	0	0	0	0	0	0	0	0	0	0	0	0	0	0	0	0
1015103346	0	60000	380000	1180000	0	0	0	0	0	0	0	0	0	0	0	0	0	0	0	0	60000	0	0	0	0	0	0	0	0	0	0	0	0	0	0	0	0	0
1023501035	260000	1280000	1000000	1780000	700000	1980000	0	0	0	1340000	1540000	1800000	2280000	2360000	0	1200000	1660000	0	0	0	1080000	1980000	0	0	0	0	0	0	0	0	0	40000	0	0	2260000	0	340000	1700000
1524758	240000	1480000	1500000	1940000	1360000	0	0	0	1640000	1180000	100000	0	0	2320000	0	1220000	1620000	0	0	0	1600000	40000	0	0	0	0	0	0	0	0	0	1500000	0	0	2720000	0	0	0
1029579867	280000	1120000	1120000	1940000	1260000	0	0	0	1700000	1300000	1440000	0	0	2320000	0	1320000	1480000	0	0	0	1720000	0	0	0	0	0	0	0	0	0	0	1440000	0	0	2260000	0	0	1580000
1023456797	180000	1080000	900000	440000	0	0	0	0	0	0	0	0	0	0	0	0	0	0	0	0	920000	0	0	0	0	0	0	0	0	0	0	0	0	0	0	0	0	0
1029916066	0	1280000	1160000	800000	0	0	0	0	0	0	0	0	0	0	0	0	0	0	0	0	1000000	0	0	0	0	0	0	0	0	0	0	0	0	0	0	0	0	0
1030761068	0	1340000	1300000	2220000	0	760000	0	0	1500000	0	0	1200000	860000	300000	2080000	1480000	0	0	0	0	1480000	340000	0	0	0	0	0	0	0	820000	0	0	120000	0	0	0	340000	0
1019795958	240000	1380000	2460000	2260000	1260000	0	0	0	1540000	1160000	900000	940000	0	2120000	0	1480000	1520000	0	0	0	1520000	1980000	0	0	0	0	0	0	0	0	0	1420000	0	0	2280000	0	0	1380000
1031163478	0	0	960000	1440000	0	0	0	0	980000	0	0	0	0	20000	0	960000	0	0	0	0	0	0	0	0	0	0	0	0	0	0	0	0	0	0	0	0	0	0
1029410001	180000	1460000	40000	0	0	0	0	0	0	0	0	0	0	0	0	0	0	0	0	0	980000	0	0	0	0	0	0	0	0	0	0	0	0	0	0	0	0	0
1024879250	260000	1400000	1380000	2240000	0	1880000	260000	980000	1620000	0	1460000	1700000	340000	1540000	1660000	1500000	2620000	0	0	1940000	1500000	840000	960000	0	1280000	0	1780000	2220000	920000	1260000	1060000	320000	1260000	2020000	2080000	840000	60000	1580000
1032689119	0	820000	840000	2020000	0	0	0	0	860000	0	1040000	0	0	1400000	0	1000000	0	0	0	0	920000	0	0	0	0	0	0	0	0	0	0	0	0	0	0	0	0	1000000
1018062871	180000	940000	920000	1500000	0	0	0	0	120000	0	980000	0	0	40000	0	1000000	0	0	0	0	1100000	0	0	0	0	0	0	0	0	0	0	0	0	0	0	0	0	340000
1027586014	60000	1120000	1120000	1880000	0	0	0	0	1020000	20000	1060000	0	0	1560000	0	1180000	0	0	0	0	900000	0	0	0	0	0	0	0	0	0	0	0	0	0	0	0	0	1080000
1019276534	0	520000	1360000	540000	0	0	0	0	0	0	0	0	0	0	0	0	0	0	0	0	0	0	0	0	0	0	0	0	0	0	0	0	0	0	0	0	0	0
1020810666	200000	1160000	1140000	2060000	0	0	0	0	540000	0	0	0	0	0	0	1200000	0	0	0	0	1220000	0	0	0	0	0	0	0	0	0	0	0	0	0	0	0	0	0
1027759296	180000	920000	1300000	40000	0	0	0	0	0	0	0	0	0	0	0	0	0	0	0	0	1140000	0	0	0	0	0	0	0	0	0	0	0	0	0	0	0	0	0
1018232799	220000	1140000	980000	340000	0	0	0	0	0	20000	1140000	0	0	1920000	0	0	0	0	0	0	1060000	0	0	0	0	0	0	0	0	0	0	0	0	0	0	0	0	1240000
11726689	260000	1120000	1120000	1820000	0	0	0	0	1220000	0	1180000	0	0	1820000	0	1220000	0	0	0	0	2100000	0	0	0	0	0	0	0	0	0	0	0	0	0	0	0	0	640000
1600210	260000	600000	1320000	1880000	0	0	0	0	0	0	0	0	0	0	0	100000	0	0	0	0	1240000	0	0	0	0	0	0	0	0	0	0	0	0	0	0	0	0	0
1015708587	180000	840000	760000	2040000	0	0	0	0	1380000	80000	1500000	0	0	2440000	0	1740000	0	0	0	0	1320000	0	0	0	0	0	0	0	0	0	0	0	0	0	40000	0	0	1140000
1028740002	200000	1460000	1200000	2260000	0	0	0	0	0	0	0	0	0	0	0	20000	0	0	0	0	920000	0	0	0	0	0	0	0	0	0	0	0	0	0	0	0	0	0
1027795029	240000	1340000	220000	0	0	0	0	0	0	0	0	0	0	0	0	0	0	0	0	0	1460000	0	0	0	0	0	0	0	0	0	0	0	0	0	0	0	0	0
1028044245	0	1500000	1940000	2540000	1240000	4180000	0	0	1580000	1200000	1520000	1900000	3320000	2360000	0	1620000	1500000	0	0	0	1580000	2020000	0	0	0	0	0	0	0	180000	0	1860000	0	0	2280000	0	4420000	1700000
1017685985	180000	920000	740000	0	0	0	0	0	0	0	980000	0	0	1480000	0	0	0	0	0	0	1100000	0	0	0	0	0	0	0	0	0	0	0	0	0	0	0	0	1060000
1026686405	0	1620000	320000	0	0	0	0	0	0	0	0	0	0	0	0	0	0	0	0	0	1440000	0	0	0	0	0	0	0	0	0	0	0	0	0	0	0	0	0
1031525168	260000	1400000	20000	1280000	0	0	0	0	300000	0	0	0	0	0	0	1520000	0	0	0	0	1960000	0	0	0	0	0	0	0	0	0	0	0	0	0	0	0	0	0
1021847294	20000	1380000	1380000	2280000	1300000	1780000	780000	1200000	1540000	1180000	1440000	1740000	1880000	2260000	0	1520000	1480000	980000	1040000	80000	1520000	2000000	1200000	0	0	0	0	0	0	1280000	940000	1440000	1400000	2060000	2200000	980000	1100000	1580000
3293827	0	0	1360000	2380000	0	0	0	0	0	0	0	0	0	0	0	980000	0	0	0	0	60000	0	0	0	0	0	0	0	0	0	0	0	0	0	0	0	0	0
9846063	0	660000	60000	0	0	0	0	0	0	0	0	0	0	0	0	0	0	0	0	0	0	0	0	0	0	0	0	0	0	0	0	0	0	0	0	0	0	0
1028764239	80000	800000	980000	780000	0	0	0	0	0	0	0	0	0	0	0	0	0	0	0	0	180000	0	0	0	0	0	0	0	0	0	0	0	0	0	0	0	0	0
1631719	260000	1440000	1380000	20000	0	0	0	0	0	0	0	0	0	0	0	60000	0	0	0	0	1760000	0	0	0	0	0	0	0	0	0	0	0	0	0	0	0	0	0
11307321	0	1200000	200000	1860000	0	0	0	0	1420000	0	0	0	0	20000	0	1140000	0	0	0	0	1120000	0	0	0	0	0	0	0	0	0	0	0	0	0	0	0	0	0
1666342	0	640000	780000	1720000	1000000	1580000	0	0	1280000	940000	1160000	1380000	1460000	1820000	0	1200000	1220000	0	0	0	580000	1700000	40000	0	0	0	0	0	0	1080000	460000	1180000	840000	1540000	1840000	560000	1060000	1260000
1025293417	100000	920000	920000	1980000	0	0	0	0	1220000	0	0	0	0	380000	0	1180000	0	0	0	0	1000000	0	0	0	0	0	0	0	0	0	0	0	0	0	0	0	0	0
1030328218	0	1420000	40000	0	0	1960000	0	0	540000	0	0	1760000	1920000	320000	0	0	80000	0	0	0	1580000	2060000	0	0	0	0	0	0	0	0	0	0	0	0	0	0	1340000	0
11494700	60000	100000	1260000	2400000	40000	0	0	0	1360000	1180000	1460000	0	0	2300000	0	1500000	0	0	0	0	40000	0	0	0	0	0	0	0	0	0	0	1460000	0	0	2200000	0	0	1560000
1025943934	0	760000	220000	0	0	0	0	0	0	0	0	0	0	0	0	0	0	0	0	0	220000	0	0	0	0	0	0	0	0	0	0	0	0	0	0	0	0	0
1020630655	260000	1360000	680000	0	0	0	0	0	0	0	0	0	0	0	0	0	0	0	0	0	1380000	0	0	0	0	0	0	0	0	0	0	0	0	0	0	0	100000	0
1026032620	260000	1360000	1400000	2240000	1260000	0	0	0	1520000	1200000	1440000	0	0	2160000	0	1500000	1500000	0	0	0	1580000	300000	0	0	0	0	0	0	0	0	0	1480000	0	0	2180000	0	0	1620000
1019217977	0	820000	1000000	120000	2560000	1900000	820000	1080000	1340000	1260000	3000000	1760000	1900000	3760000	0	2240000	1480000	2040000	1040000	0	660000	1980000	0	0	0	0	0	0	0	2640000	1060000	4200000	1820000	2020000	4440000	1980000	1280000	2720000
1029409524	180000	1160000	1100000	2040000	1400000	1600000	820000	1140000	1260000	1160000	1160000	1700000	1920000	1940000	1720000	1260000	1640000	840000	840000	2020000	1200000	2160000	1180000	1380000	1360000	2020000	1320000	2100000	1580000	1180000	860000	1460000	1040000	1700000	2200000	740000	1080000	1460000
1026953415	40000	1380000	1360000	2300000	1340000	1420000	0	0	1620000	1160000	1480000	1240000	2920000	2460000	0	1960000	1080000	0	0	0	1560000	1220000	0	0	0	0	0	0	0	0	0	1400000	0	0	2240000	0	20000	1700000
1027069968	220000	1100000	1120000	1520000	700000	1060000	0	0	1840000	1880000	1180000	1200000	1120000	1800000	0	1400000	1060000	0	0	0	1260000	1360000	0	0	0	0	0	0	0	0	0	1580000	0	0	1760000	0	20000	1640000
1022461671	220000	1520000	1580000	620000	0	0	0	0	0	0	0	0	0	0	0	0	0	0	0	0	1680000	0	0	0	0	0	0	0	0	0	0	0	0	0	0	0	0	0
12241130	80000	980000	20000	0	0	0	0	0	0	0	0	0	0	0	0	0	0	0	0	0	1060000	0	0	0	0	0	0	0	0	0	0	0	0	0	0	0	0	0
1015583830	0	1380000	660000	0	0	0	0	0	0	0	0	0	0	0	0	0	0	0	0	0	1500000	0	0	0	0	0	0	0	0	0	0	0	0	0	0	0	0	0
1031448902	300000	1380000	1360000	2240000	0	0	0	0	0	0	0	0	0	0	0	1560000	0	0	0	0	1440000	0	0	0	0	0	0	0	0	0	0	0	0	0	0	0	0	0
1017762347	80000	760000	1420000	2220000	1140000	1940000	320000	1220000	0	1320000	1480000	1700000	2260000	2400000	0	180000	1460000	960000	1040000	1200000	1560000	2080000	1180000	0	1600000	0	20000	2380000	2180000	1300000	1060000	40000	1280000	2020000	0	620000	1320000	1740000
1029534903	280000	700000	700000	1140000	1240000	980000	0	0	820000	800000	740000	860000	960000	780000	0	760000	1480000	680000	1060000	0	780000	980000	1160000	0	0	0	0	0	0	660000	560000	1400000	40000	1080000	2160000	420000	660000	800000
1031092048	0	1360000	1380000	2240000	1220000	2560000	1600000	1000000	1480000	1260000	1460000	0	0	2360000	40000	1440000	1440000	700000	0	0	1700000	240000	160000	0	0	0	0	0	0	1300000	1060000	1400000	1260000	2100000	2180000	840000	1300000	1600000
1018228725	0	0	1320000	700000	1080000	1500000	640000	840000	540000	940000	1160000	1160000	1520000	2040000	0	900000	540000	780000	840000	1360000	20000	1280000	960000	0	0	0	0	0	40000	1120000	880000	1140000	1020000	1440000	1740000	240000	560000	620000
1024615614	0	40000	1060000	2040000	0	0	0	0	0	0	0	0	0	0	0	340000	0	0	0	0	20000	0	0	0	0	0	0	0	0	0	0	0	0	0	0	0	0	0
1018657219	0	1200000	720000	40000	0	0	0	0	0	0	0	0	0	0	0	0	0	0	0	0	880000	0	0	0	0	0	0	0	0	0	0	0	0	0	0	0	0	0
9439742	300000	1360000	1420000	2240000	0	0	0	0	1560000	0	0	0	0	2280000	0	40000	0	0	0	0	1600000	0	0	0	0	0	0	0	0	0	0	0	0	0	0	0	0	0
1028406397	140000	940000	920000	960000	780000	1280000	480000	680000	1240000	20000	980000	1080000	1080000	1660000	1160000	1020000	940000	580000	700000	1340000	1160000	1240000	760000	1220000	920000	1500000	960000	1340000	1200000	780000	620000	900000	780000	1080000	0	500000	780000	1000000
1029870733	0	980000	780000	0	0	0	0	0	0	0	0	0	0	0	0	0	0	0	0	0	0	0	0	0	0	0	0	0	0	0	0	0	0	0	0	0	0	0
1018797616	360000	1440000	40000	0	0	0	0	0	0	0	0	0	0	0	0	0	0	0	0	0	1440000	0	0	0	0	0	0	0	0	0	0	0	0	0	0	0	0	0
1026758854	0	920000	1300000	1500000	320000	1320000	400000	440000	1040000	820000	0	1020000	20000	80000	0	1140000	600000	540000	540000	0	960000	1260000	640000	0	0	0	0	0	0	880000	560000	20000	720000	1220000	1040000	600000	860000	860000
2535559	120000	1140000	160000	0	0	0	0	0	0	0	0	0	0	0	0	0	0	0	0	0	1080000	0	0	0	0	0	0	0	0	0	0	0	0	0	0	0	0	0
1014781978	180000	940000	80000	0	0	0	0	0	0	0	0	0	0	0	0	0	0	0	0	0	1020000	0	0	0	0	0	0	0	0	0	0	0	0	0	0	0	0	0
1026886924	0	1340000	1480000	2520000	1300000	2340000	800000	1260000	1800000	1340000	1500000	280000	1900000	2400000	0	2620000	1700000	960000	1100000	1980000	760000	2260000	1600000	0	0	0	0	1740000	1620000	1300000	0	1540000	20000	1200000	2940000	0	1320000	2160000
6171863	0	2820000	1480000	2280000	0	0	0	0	1520000	0	40000	0	0	240000	0	1500000	0	0	0	0	1540000	0	0	0	0	0	0	0	0	0	0	0	0	0	0	0	0	0
1030511409	0	840000	1340000	1480000	0	0	0	0	0	0	0	0	0	0	0	0	0	0	0	0	840000	0	0	0	0	0	0	0	0	0	0	0	0	0	0	0	0	0
1014767347	20000	1000000	1060000	1640000	0	0	0	0	0	0	0	0	0	0	0	0	0	0	0	0	1020000	0	0	0	0	0	0	0	0	0	0	0	0	0	0	0	0	0
1029543420	160000	1500000	1440000	0	0	0	0	0	0	0	0	0	0	0	0	0	0	0	0	0	1580000	0	0	0	0	0	0	0	0	0	0	0	0	0	0	0	0	0
1020995969	260000	1360000	1380000	2240000	0	0	0	0	0	0	0	0	0	0	0	900000	0	0	0	0	1520000	0	0	0	0	0	0	0	0	0	0	0	0	0	0	0	0	0
1029663698	140000	1360000	1400000	2220000	0	0	0	0	2160000	0	0	0	0	0	0	1020000	0	0	0	0	1160000	0	0	0	0	0	0	0	0	0	0	0	0	0	0	0	0	0
1027953018	0	0	160000	0	0	0	0	0	0	0	0	0	0	0	0	0	0	0	0	0	740000	0	0	0	0	0	0	0	0	0	0	0	0	0	0	0	0	0
1021035833	120000	860000	1000000	1860000	0	0	0	0	1240000	0	0	0	0	60000	0	1280000	0	0	0	0	960000	0	0	0	0	0	0	0	0	0	0	0	0	0	0	0	0	0
10996564	20000	360000	1440000	2400000	0	0	0	0	940000	0	480000	0	0	300000	0	640000	0	0	0	0	400000	0	0	0	0	0	0	0	0	0	0	0	0	0	0	0	0	1820000
10547724	160000	1160000	780000	0	0	0	0	0	0	0	0	0	0	40000	0	0	0	0	0	0	1140000	0	0	0	0	0	0	0	0	0	0	0	0	0	0	0	0	0
1029873226	300000	1380000	1380000	2240000	0	0	0	0	20000	0	0	0	0	0	0	1500000	0	0	0	0	1760000	0	0	0	0	0	0	0	0	0	0	0	0	0	0	0	0	0
1030961062	260000	1360000	1380000	2240000	0	0	0	0	0	0	0	0	0	0	0	60000	0	0	0	0	1500000	0	0	0	0	0	0	0	0	0	0	0	0	0	0	0	0	0
1030371496	880000	4280000	4780000	4500000	0	0	0	0	720000	1160000	1580000	0	0	8960000	0	2960000	0	0	0	0	4780000	0	0	0	0	0	0	0	0	0	0	420000	0	0	2160000	0	0	1600000
1018650814	0	1200000	1220000	2260000	0	0	0	0	0	0	0	0	0	0	0	40000	0	0	0	0	880000	0	0	0	0	0	0	0	0	0	0	0	0	0	0	0	0	0
1017482940	240000	1340000	1380000	2240000	0	0	0	0	400000	0	0	0	0	0	0	1480000	0	0	0	0	1500000	0	0	0	0	0	0	0	0	0	0	0	0	0	0	0	0	0
1030103198	300000	1220000	1140000	1900000	720000	1560000	20000	0	1360000	980000	60000	1440000	1500000	60000	1440000	1260000	780000	0	0	0	1640000	1720000	0	1440000	1160000	1700000	660000	200000	100000	1100000	660000	1020000	1040000	0	1820000	680000	1000000	0
1019637069	260000	1380000	1380000	140000	0	0	0	0	0	0	0	0	0	0	0	0	0	0	0	0	1620000	0	0	0	0	0	0	0	0	0	0	0	0	0	0	0	0	0
1018535027	0	940000	40000	0	0	0	0	0	0	0	0	0	0	0	0	0	0	0	0	0	660000	0	0	0	0	0	0	0	0	0	0	0	0	0	0	0	0	0
1019572591	20000	280000	1380000	2260000	0	0	520000	720000	1420000	1000000	1440000	1040000	0	2260000	0	1500000	0	560000	540000	1280000	1480000	40000	860000	1340000	1080000	80000	1220000	1680000	1720000	1300000	900000	0	1400000	1920000	180000	820000	1160000	1440000
1024728543	0	0	40000	0	0	0	0	0	0	0	0	0	0	1000000	0	0	0	0	0	0	0	0	0	0	0	0	0	0	0	0	0	0	0	0	0	0	0	0
1023774466	280000	1360000	1380000	2080000	0	0	0	0	0	0	0	0	0	0	0	0	0	0	0	0	1520000	0	0	0	0	0	0	0	0	0	0	0	0	0	0	0	0	0
1016108207	0	1440000	1560000	60000	0	0	0	0	0	0	0	0	0	0	0	0	0	0	0	0	1220000	0	0	0	0	0	0	0	0	0	0	0	0	0	0	0	0	0
1023769222	0	1720000	1440000	2360000	1280000	2200000	0	0	1740000	2360000	1740000	1880000	0	2360000	0	1520000	1900000	0	0	0	1680000	2100000	0	0	0	0	0	0	0	1400000	1200000	1420000	1400000	2140000	2400000	920000	1440000	1500000
3898316	20000	660000	1440000	1960000	400000	0	0	0	1360000	280000	980000	0	0	1600000	0	1500000	1340000	0	0	0	920000	1800000	0	0	0	0	0	0	0	0	0	840000	0	0	1460000	0	0	1260000
1030053989	0	40000	20000	1120000	860000	60000	1020000	840000	1520000	820000	1440000	1140000	1260000	2240000	0	1480000	1000000	1240000	1340000	1080000	40000	1360000	1580000	0	0	0	0	0	0	1040000	600000	980000	840000	2860000	1500000	460000	920000	940000
1023747820	80000	1740000	1460000	40000	0	0	0	0	0	0	1500000	0	0	800000	0	0	0	0	0	0	1660000	0	0	0	0	0	0	0	0	0	0	0	0	0	0	0	0	1800000
1023602444	260000	1400000	1300000	2260000	0	0	0	0	1480000	0	1380000	0	0	2220000	0	1460000	0	0	0	0	1540000	0	0	0	0	0	0	0	0	0	0	0	0	0	0	0	0	1500000
1031094233	140000	1440000	20000	0	0	0	0	0	0	0	0	0	0	0	0	0	0	0	0	0	1720000	0	0	0	0	0	0	0	0	0	0	0	0	0	0	0	0	0
1032664211	340000	1820000	1820000	2980000	0	0	0	0	0	0	0	0	0	0	0	360000	0	0	0	0	1980000	0	0	0	0	0	0	0	0	0	0	0	0	0	0	0	0	0
1023571674	0	1360000	240000	0	0	0	0	0	0	0	0	0	0	0	0	0	0	0	0	0	1500000	0	0	0	0	0	0	0	0	0	0	0	0	0	0	0	0	0
7345379	0	0	1300000	2240000	0	0	0	0	1940000	0	1440000	0	0	2900000	0	1500000	0	0	0	0	0	0	0	0	0	0	0	0	0	0	0	0	0	0	0	0	0	1160000
1022163593	240000	1380000	1380000	2340000	0	0	0	0	1540000	80000	1480000	0	0	2220000	0	1500000	0	0	0	0	1480000	0	0	0	0	0	0	0	0	0	0	0	0	0	0	0	0	1820000
1015333194	160000	1040000	1360000	1640000	60000	0	200000	600000	1500000	480000	1400000	0	0	1880000	0	1460000	140000	60000	20000	120000	1200000	0	1120000	2060000	0	0	0	800000	1780000	0	0	20000	0	0	40000	0	0	1460000
1018958644	0	1040000	1780000	0	1240000	0	0	0	1860000	1160000	1660000	0	0	2420000	0	1580000	100000	0	0	0	360000	0	0	0	0	0	0	0	0	0	0	1420000	0	0	2540000	0	0	1700000
1028685835	0	1360000	1460000	2340000	1260000	1980000	800000	1220000	1560000	1200000	1620000	1660000	1880000	2280000	0	1600000	1520000	1020000	1180000	2360000	1660000	2020000	1440000	160000	1780000	0	1940000	2340000	2040000	1480000	1060000	1600000	1340000	2160000	2140000	840000	1340000	1620000
3583276	220000	1100000	1480000	1820000	0	0	0	0	0	0	0	0	0	0	0	0	0	0	0	0	1200000	0	0	0	0	0	0	0	0	0	0	0	0	0	0	0	0	0
1029556921	160000	820000	780000	1660000	40000	120000	720000	700000	1540000	1280000	1480000	140000	0	2340000	1900000	1240000	20000	960000	1000000	740000	980000	1620000	1220000	2080000	1640000	3140000	1780000	2320000	2240000	1340000	1080000	1360000	1300000	1980000	780000	980000	1280000	1620000
1026614361	0	1440000	1340000	2280000	1200000	2020000	980000	1240000	1720000	1000000	1500000	1720000	1940000	2820000	0	1420000	1520000	1000000	1060000	500000	1540000	1940000	1140000	2120000	1720000	1240000	1820000	2420000	2180000	1620000	1100000	1440000	1300000	2120000	1620000	820000	2980000	1580000
9602087	260000	40000	1440000	2260000	1420000	1300000	0	0	1380000	1240000	2680000	1920000	1860000	2740000	0	1460000	1320000	0	0	0	1640000	1900000	0	0	0	0	0	0	0	540000	0	1380000	0	0	2260000	0	1060000	4020000
1023480888	260000	1720000	580000	20000	0	0	0	0	0	0	0	0	0	0	0	0	0	0	0	0	1640000	0	0	0	0	0	0	0	0	0	0	0	0	0	0	0	0	0
1029477361	260000	1380000	220000	0	0	0	0	0	0	0	620000	0	0	100000	0	0	0	0	0	0	1860000	0	0	0	0	0	0	0	0	0	0	0	0	0	0	0	0	1420000
1026397846	200000	1420000	1420000	20000	0	0	0	0	0	0	0	0	0	0	0	0	0	0	0	0	1540000	0	0	0	0	0	0	0	0	0	0	0	0	0	0	0	0	0
1030720980	360000	7140000	7260000	8260000	880000	2060000	800000	1380000	4000000	2320000	1620000	3520000	2960000	2440000	20000	4520000	1500000	1380000	2040000	2360000	6080000	4100000	1380000	20000	20000	20000	20000	0	160000	1300000	1080000	1420000	1340000	1840000	7020000	840000	1300000	1780000
1020733006	80000	340000	920000	1320000	0	0	0	0	0	0	500000	0	0	1340000	0	0	0	0	0	0	1520000	0	0	0	0	0	0	0	0	0	0	0	0	0	0	0	0	0
1031064827	0	0	80000	260000	100000	0	0	0	1440000	1060000	1220000	0	0	1100000	0	1440000	420000	0	0	0	340000	0	0	0	0	0	0	0	0	0	0	0	0	0	700000	0	0	1500000
2303022	260000	1380000	1380000	2640000	0	0	0	0	1880000	1160000	380000	0	0	2320000	0	1520000	0	0	0	0	1500000	0	0	0	0	0	0	0	0	0	0	40000	0	0	2240000	0	0	1540000
1028182761	160000	60000	1520000	0	0	0	0	0	0	0	0	0	0	0	0	0	0	0	0	0	1280000	0	0	0	0	0	0	0	0	0	0	0	0	0	0	0	0	0
1031071478	120000	1280000	1440000	2220000	0	0	0	0	1520000	0	780000	0	0	2600000	0	1640000	0	0	0	0	1520000	0	0	0	0	0	0	0	0	0	0	0	0	0	0	0	0	0
9802474	0	1420000	1380000	2200000	0	0	0	0	1360000	20000	1540000	0	0	2180000	0	1480000	0	0	0	0	1500000	0	0	0	0	0	0	0	0	0	0	0	0	0	0	0	0	1560000
1029450838	320000	1400000	1520000	2300000	0	0	0	0	260000	0	740000	0	0	80000	0	1540000	0	0	0	0	1540000	0	0	0	0	0	0	0	0	0	0	0	0	0	0	0	0	840000
1032170929	0	0	20000	2220000	0	0	0	0	1060000	0	0	0	0	0	0	1460000	0	0	0	0	0	0	0	0	0	0	0	0	0	0	0	0	0	0	0	0	0	0
1030430449	200000	700000	680000	1140000	0	0	0	0	780000	0	740000	0	0	1160000	1040000	760000	0	0	0	0	760000	0	0	1060000	880000	1220000	920000	1180000	40000	0	0	0	0	0	0	0	0	540000
1028499935	0	480000	40000	0	0	0	0	0	0	0	0	0	0	0	0	0	0	0	0	0	720000	0	0	0	0	0	0	0	0	0	0	0	0	0	0	0	0	0
1027768771	280000	1420000	1660000	2920000	0	0	0	0	1960000	0	1440000	0	0	2360000	0	1480000	0	0	0	0	1680000	0	0	0	0	0	0	0	0	0	0	0	0	0	0	0	0	1580000
1029413815	220000	1180000	1100000	1880000	1260000	2740000	520000	680000	1220000	1040000	1580000	3220000	4660000	3760000	2200000	1280000	1500000	760000	640000	2260000	1380000	2840000	640000	3660000	1920000	3920000	1820000	2400000	1800000	1320000	1080000	1760000	1400000	1340000	1860000	840000	1300000	1680000
1023718343	220000	1180000	540000	0	0	0	0	0	0	0	0	0	0	0	0	0	0	0	0	0	1440000	0	0	0	0	0	0	0	0	0	0	0	0	0	0	0	0	0
1028130357	260000	1580000	1020000	0	0	0	0	0	440000	0	980000	0	0	1420000	0	220000	0	0	0	0	1380000	0	0	0	0	0	0	0	0	0	0	0	0	0	0	0	0	380000
7382549	220000	1480000	1120000	1860000	0	0	0	0	0	0	0	0	0	280000	0	20000	0	0	0	0	1300000	0	0	0	0	0	0	0	0	0	0	0	0	0	0	0	0	0
1029507622	0	780000	480000	0	0	0	0	0	0	0	0	0	0	0	0	0	0	0	0	0	1000000	0	0	0	0	0	0	0	0	0	0	0	0	0	0	0	0	0
1014376639	0	140000	1420000	2640000	0	0	0	0	0	0	0	0	0	0	0	1080000	0	0	0	0	0	0	0	0	0	0	0	0	0	0	0	0	0	0	0	0	0	0
1029815501	0	1160000	560000	0	0	0	0	0	0	0	0	0	0	200000	0	0	0	0	0	0	1280000	0	0	0	0	0	0	0	0	0	0	0	0	0	0	0	0	0
1019137710	260000	1460000	1300000	2000000	0	0	0	0	1300000	0	1500000	0	0	2360000	0	1540000	0	0	0	0	1540000	0	0	0	0	0	0	0	0	0	0	0	0	0	0	0	0	1600000
1017155345	0	920000	220000	2200000	0	20000	0	0	0	1180000	0	1740000	2020000	0	0	0	0	0	0	0	140000	1980000	0	0	0	0	0	0	0	1400000	1060000	0	1320000	560000	2120000	840000	1340000	0
4628118	0	20000	1900000	60000	0	0	0	0	0	0	0	0	0	0	0	0	0	0	0	0	20000	0	0	0	0	0	0	0	0	0	0	0	0	0	0	0	0	0
1018642637	0	1360000	1380000	2280000	0	0	0	0	1500000	0	0	0	0	2080000	0	1480000	0	0	0	0	1520000	0	0	0	0	0	0	0	0	0	0	0	0	0	0	0	0	0
1029493855	260000	1720000	1420000	40000	0	0	0	0	0	0	0	0	0	0	0	0	0	0	0	0	1580000	0	0	0	0	0	0	0	0	0	0	0	0	0	0	0	0	0
12938247	0	40000	1480000	20000	0	0	0	0	0	0	0	0	0	0	0	0	0	0	0	0	0	0	0	0	0	0	0	0	0	0	0	0	0	0	0	0	0	0
1026753134	260000	1180000	540000	2060000	2160000	2360000	0	0	1680000	1280000	1500000	780000	2260000	2140000	0	2280000	2600000	0	0	0	1400000	540000	0	0	0	0	0	0	0	0	0	2280000	0	0	3040000	0	0	2100000
11933371	0	1480000	1520000	1120000	0	0	0	0	0	0	0	0	0	0	0	0	0	0	0	0	1520000	0	0	0	0	0	0	0	0	0	0	0	0	0	0	0	0	0
5309418	0	320000	2480000	1140000	0	0	0	0	0	1160000	0	0	0	900000	0	2000000	0	0	0	0	1220000	0	0	0	0	0	0	0	0	0	0	0	0	0	0	0	0	0
1029456487	140000	1360000	1120000	1540000	0	0	0	0	1020000	1080000	1080000	0	0	1760000	0	1080000	0	0	0	0	2060000	0	0	0	0	0	0	0	0	0	0	0	0	0	620000	0	0	1220000
1018239538	60000	800000	800000	1300000	0	0	0	0	880000	680000	820000	0	0	1320000	0	860000	0	0	0	0	920000	0	0	0	0	0	0	0	0	0	0	0	0	0	120000	0	0	920000
1032025573	160000	1400000	1180000	1960000	0	0	0	0	1800000	0	1440000	0	0	2320000	0	1840000	0	0	0	0	1420000	0	0	0	0	0	0	0	0	0	0	0	0	0	0	0	0	620000
1019811397	200000	1340000	1080000	1720000	1080000	2260000	600000	200000	2220000	900000	1280000	1400000	3340000	2900000	0	1140000	1360000	1100000	700000	0	1240000	2480000	860000	0	0	0	0	0	0	1000000	920000	1580000	920000	1620000	1700000	820000	1140000	1520000
1028921979	0	160000	40000	0	0	0	0	0	0	0	0	0	0	0	0	0	0	0	0	0	0	0	0	0	0	0	0	0	0	0	0	0	0	0	0	0	0	0
1022008823	240000	1480000	1240000	1780000	980000	0	0	0	1520000	1180000	1560000	0	0	2280000	0	1480000	0	0	0	0	1500000	0	0	0	0	0	0	0	0	0	0	2680000	0	0	2640000	0	0	1600000
1028553853	0	1360000	1380000	2260000	0	0	0	0	740000	1280000	1460000	0	0	2340000	0	940000	0	0	0	0	1240000	0	0	0	0	0	0	0	0	0	0	0	0	0	160000	0	0	1040000
1029384151	0	1360000	1240000	0	0	0	0	0	0	0	0	0	0	0	0	0	0	0	0	0	1500000	0	0	0	0	0	0	0	0	0	0	0	0	0	0	0	0	0
1029906119	100000	2060000	1360000	2600000	0	0	0	0	1180000	480000	1720000	0	0	2240000	0	1480000	0	0	0	0	1420000	0	0	0	0	0	0	0	0	0	0	0	0	0	0	0	0	1580000
1020137518	0	1720000	1580000	2720000	0	0	0	0	0	0	0	0	0	0	0	40000	0	0	0	0	1300000	0	0	0	0	0	0	0	0	0	0	0	0	0	0	0	0	0
1021389332	200000	1220000	20000	0	0	0	0	0	0	0	0	0	0	0	0	0	0	0	0	0	1340000	0	0	0	0	0	0	0	0	0	0	0	0	0	0	0	0	0
1025021922	0	0	400000	1540000	860000	1540000	0	0	1280000	2920000	660000	2740000	1700000	1820000	0	1500000	920000	0	0	0	0	880000	0	0	0	0	0	0	0	0	0	1120000	0	0	1820000	0	1000000	0
10702743	240000	1760000	1480000	2460000	0	0	0	0	1860000	0	0	0	0	420000	0	1800000	0	0	0	0	1820000	0	0	0	0	0	0	0	0	0	0	0	0	0	0	0	0	0
1015705915	140000	820000	1020000	1280000	0	0	0	0	200000	0	0	0	0	0	0	880000	0	0	0	0	840000	0	0	0	0	0	0	0	0	0	0	0	0	0	0	0	0	0
1022432866	0	1740000	1400000	0	0	0	0	0	0	0	0	0	0	0	0	0	0	0	0	0	1480000	0	0	0	0	0	0	0	0	0	0	0	0	0	0	0	0	0
1029056829	260000	1380000	1380000	2360000	1240000	2040000	1220000	1300000	100000	1160000	1620000	1840000	1900000	1980000	2100000	400000	1480000	980000	1100000	1840000	1500000	2320000	1160000	2120000	1780000	2420000	1940000	2460000	2040000	1340000	1060000	1400000	1340000	2020000	2240000	1020000	1280000	1320000
3900431	220000	1120000	1220000	120000	0	0	0	0	0	0	0	0	0	0	0	0	0	0	0	0	1320000	0	0	0	0	0	0	0	0	0	0	0	0	0	0	0	0	0
1023387981	0	20000	300000	0	20000	0	0	0	0	20000	0	20000	0	0	0	0	0	0	0	0	200000	0	0	0	0	0	0	0	0	0	0	0	0	0	0	0	0	0
1029299705	260000	0	300000	0	0	0	0	0	0	0	0	0	0	1900000	0	0	0	0	0	0	340000	0	0	0	0	0	0	0	0	0	0	0	0	0	0	0	0	0
1026590232	260000	1360000	240000	0	0	0	0	0	0	0	0	0	0	0	0	0	0	0	0	0	2220000	0	0	0	0	0	0	0	0	0	0	0	0	0	0	0	0	0
1030221122	20000	840000	1000000	1540000	0	0	0	0	800000	0	780000	0	0	1180000	0	940000	0	0	0	0	940000	0	0	0	0	0	0	0	0	0	0	0	0	0	0	0	0	900000
1031065343	0	1320000	1360000	80000	0	0	0	0	0	0	0	0	0	0	0	0	0	0	0	0	1480000	0	0	0	0	0	0	0	0	0	0	0	0	0	0	0	0	0
1019814943	0	1780000	1920000	2480000	1280000	180000	0	0	1640000	1560000	1620000	2560000	2780000	2980000	0	1840000	2720000	0	0	0	1760000	3480000	0	0	0	0	0	0	0	0	0	3000000	0	0	5280000	0	0	1820000
1030294973	0	340000	1500000	2240000	1280000	40000	40000	60000	1520000	1180000	0	1300000	1540000	1260000	40000	1500000	1540000	40000	20000	40000	20000	1620000	0	20000	0	80000	0	20000	60000	1040000	60000	1440000	40000	100000	2120000	60000	1000000	0
5020184	220000	920000	820000	1620000	1240000	40000	0	0	660000	1160000	940000	1680000	60000	700000	0	780000	20000	20000	120000	0	1380000	20000	20000	0	0	0	0	0	0	1180000	20000	820000	20000	280000	20000	760000	1200000	1040000
1022307865	0	1320000	880000	0	0	0	0	0	0	0	0	0	0	0	0	0	0	0	0	0	1280000	0	0	0	0	0	0	0	0	0	0	0	0	0	0	0	0	0
8970127	360000	3680000	1640000	2580000	0	0	0	0	460000	0	0	0	0	0	0	1120000	0	0	0	0	5340000	0	0	0	0	0	0	0	0	0	0	0	0	0	0	0	0	0
1021021797	200000	1420000	20000	0	0	0	0	0	0	0	0	0	0	0	0	0	0	0	0	0	1340000	0	0	0	0	0	0	0	0	0	0	0	0	0	0	0	0	0
4649010	700000	1780000	2060000	4600000	260000	1340000	0	0	340000	480000	760000	1240000	1300000	1340000	0	940000	1000000	0	0	0	2500000	2240000	0	660000	1400000	0	1680000	1020000	2100000	0	0	760000	0	0	740000	0	480000	940000
1020802207	0	1380000	1220000	2120000	0	0	0	0	0	0	0	0	0	0	0	1360000	0	0	0	0	1220000	0	0	0	0	0	0	0	0	0	0	0	0	0	0	0	0	0
1024512713	260000	1220000	220000	0	1240000	1920000	0	0	0	1780000	1440000	1680000	1460000	2240000	0	0	1500000	0	0	0	1160000	1980000	0	0	0	0	0	0	0	1300000	1060000	1480000	1320000	500000	2040000	840000	1280000	1580000
1018007849	540000	1560000	180000	0	0	0	0	0	0	0	0	0	0	0	0	0	0	0	0	0	2700000	0	0	0	0	0	0	0	0	0	0	0	0	0	0	0	0	0
1029689265	0	780000	40000	0	0	0	0	0	0	0	0	0	0	0	0	0	0	0	0	0	660000	0	0	0	0	0	0	0	0	0	0	0	0	0	0	0	0	0
1029411406	200000	1180000	20000	0	0	0	0	0	0	0	0	0	0	0	0	0	0	0	0	0	1320000	0	0	0	0	0	0	0	0	0	0	0	0	0	0	0	0	0
1029292034	260000	1580000	1760000	2440000	1220000	2300000	0	0	1760000	980000	1660000	1740000	2240000	2440000	0	1580000	1660000	0	0	0	1820000	2080000	820000	0	0	0	0	0	0	1340000	40000	1420000	1080000	0	2780000	900000	2420000	1880000
1024493948	180000	960000	940000	1580000	0	0	0	0	0	0	0	0	0	0	0	780000	0	0	0	0	1040000	0	0	0	0	0	0	0	0	0	0	0	0	0	0	0	0	0
1029580861	280000	1620000	1520000	1860000	0	0	0	0	1400000	0	0	0	0	0	0	1440000	0	0	0	0	1380000	0	0	0	0	0	0	0	0	0	0	0	0	0	0	0	0	0
1027592417	0	1020000	1480000	2560000	1540000	1700000	540000	900000	1700000	1740000	1800000	1400000	1700000	3200000	0	1580000	2080000	620000	740000	120000	1380000	1460000	880000	0	0	0	0	0	0	980000	920000	2460000	940000	1580000	3660000	700000	1020000	2660000
1031482713	0	640000	940000	160000	0	0	0	0	260000	0	0	0	0	20000	0	300000	0	0	0	0	560000	0	0	0	0	0	0	0	0	0	0	0	0	0	0	0	0	0
1015343568	260000	1360000	1460000	0	0	0	0	0	40000	0	0	0	0	0	0	0	0	0	0	0	1580000	0	0	0	0	0	0	0	0	0	0	0	0	0	0	0	0	0
1030503712	280000	2220000	1380000	2360000	0	0	0	0	0	0	0	0	0	0	0	780000	0	0	0	0	2280000	0	0	0	0	0	0	0	0	0	0	0	0	0	0	0	0	0
1028170272	0	20000	40000	0	0	0	0	0	0	0	0	0	0	0	0	0	0	0	0	0	140000	0	0	0	0	0	0	0	0	0	0	0	0	0	0	0	0	0
1029701307	260000	760000	1400000	2200000	1240000	2020000	780000	1220000	1520000	1160000	660000	0	0	1360000	0	1360000	1480000	980000	1040000	2220000	1500000	1320000	1160000	0	0	0	0	0	0	1300000	1060000	1400000	1120000	300000	2140000	20000	1280000	0
1015483385	0	1140000	1140000	1860000	0	0	0	0	1240000	600000	1160000	0	0	1600000	0	1180000	0	0	0	0	1240000	0	0	0	0	0	0	0	0	0	0	0	0	0	0	0	0	520000
4053068	260000	940000	340000	40000	200000	0	780000	620000	20000	760000	820000	500000	60000	320000	0	0	520000	960000	540000	1160000	2260000	920000	620000	0	0	0	0	0	380000	0	520000	140000	0	20000	1080000	0	20000	240000
1029567877	200000	1180000	1240000	1960000	1280000	1800000	840000	1260000	1340000	1200000	900000	1480000	1920000	2520000	0	120000	1480000	1100000	1040000	2160000	1400000	2020000	2400000	1540000	1640000	400000	2160000	2240000	1060000	1380000	1100000	1400000	1620000	1960000	2040000	860000	1300000	1640000
11308234	160000	860000	960000	1400000	0	0	0	0	60000	0	0	0	0	0	0	900000	0	0	0	0	1060000	0	0	0	0	0	0	0	0	0	0	0	0	0	0	0	0	0
1029642291	0	1660000	1420000	2340000	1300000	2000000	0	0	1840000	1260000	1540000	280000	2100000	2020000	0	1580000	1600000	0	0	0	2000000	2360000	40000	0	0	0	0	0	0	1320000	1100000	1620000	1240000	2820000	2240000	140000	1280000	1720000
1029369055	240000	1140000	1460000	1180000	0	0	0	0	1160000	0	0	0	0	20000	0	1440000	0	0	0	0	1140000	0	0	0	0	0	0	0	0	0	0	0	0	0	0	0	0	0
1028560516	140000	1020000	1320000	0	0	0	0	0	0	0	0	0	0	0	0	0	0	0	0	0	800000	0	0	0	0	0	0	0	0	0	0	0	0	0	0	0	0	0
1028470433	240000	1460000	1480000	2220000	0	0	0	0	0	1140000	1420000	0	0	2320000	0	1420000	0	0	0	0	1540000	0	0	0	0	0	0	0	0	0	0	40000	0	0	1280000	0	0	620000
1097768	0	980000	1100000	400000	0	60000	0	0	1400000	20000	220000	1040000	1360000	960000	0	1040000	20000	0	0	0	1040000	1600000	0	0	0	0	0	0	0	0	0	0	0	0	0	0	0	0
1021706436	0	620000	800000	80000	60000	0	0	0	0	0	0	0	0	0	0	0	0	0	0	0	0	0	0	0	0	0	0	0	0	0	0	0	0	0	0	0	0	0
1025882532	60000	1000000	1060000	2060000	1240000	1920000	0	0	0	1180000	0	1680000	2000000	0	0	780000	1540000	0	0	0	960000	1980000	0	0	0	0	0	0	0	1280000	0	1580000	0	0	2160000	0	1320000	200000
8348557	0	940000	60000	0	0	0	0	0	0	0	0	0	0	0	0	0	0	0	0	0	1060000	0	0	0	0	0	0	0	0	0	0	0	0	0	0	0	0	0
10979990	0	920000	920000	1560000	760000	1020000	400000	600000	1100000	680000	1000000	1040000	1040000	1640000	1260000	1220000	900000	440000	560000	1200000	1100000	1220000	620000	1060000	300000	1000000	740000	720000	820000	640000	620000	940000	640000	1200000	1320000	500000	480000	1120000
5533316	0	360000	1480000	2280000	0	0	0	0	0	0	0	0	0	0	0	1020000	0	0	0	0	120000	0	0	0	0	0	0	0	0	0	0	0	0	0	0	0	0	0
1027285638	0	1380000	1440000	2240000	0	0	0	0	0	0	0	0	0	0	0	120000	0	0	0	0	780000	0	0	0	0	0	0	0	0	0	0	0	0	0	0	0	0	0
1018509840	240000	1000000	1100000	1940000	1240000	0	0	0	620000	800000	1020000	0	0	1720000	0	980000	740000	0	0	0	1220000	20000	0	0	0	0	0	0	0	0	0	1420000	0	0	2020000	0	0	1240000
1015195141	120000	1020000	900000	1060000	0	0	0	0	1240000	0	0	0	0	0	0	1180000	0	0	0	0	940000	0	0	0	0	0	0	0	0	0	0	0	0	0	0	0	0	0
1020374913	20000	1000000	1120000	1600000	780000	1580000	380000	620000	1140000	840000	980000	1040000	1260000	1660000	780000	840000	860000	680000	660000	600000	1120000	1560000	820000	1260000	880000	1180000	940000	1380000	1460000	740000	560000	960000	740000	960000	1460000	440000	720000	1040000
1032825100	0	0	40000	2240000	0	0	0	0	1520000	1000000	1460000	0	0	4480000	0	1500000	0	0	0	0	0	0	0	0	0	0	0	0	0	0	0	0	0	0	0	0	0	1580000
1030746162	0	1240000	1240000	940000	0	0	0	0	0	0	0	0	0	0	0	0	0	0	0	0	1240000	0	0	0	0	0	0	0	0	0	0	0	0	0	0	0	0	0
12140275	340000	2100000	1380000	2240000	2440000	0	0	0	120000	3880000	3680000	20000	0	7380000	0	280000	3960000	0	0	0	1820000	2020000	0	0	0	0	0	0	0	0	0	5000000	0	0	15820000	0	0	3860000
3236486	120000	40000	60000	0	0	0	0	0	0	0	0	0	0	0	0	0	0	0	0	0	60000	0	0	0	0	0	0	0	0	0	0	0	0	0	0	0	0	0
1028370461	0	560000	60000	0	0	0	0	0	0	0	0	0	0	0	0	0	0	0	0	0	860000	0	0	0	0	0	0	0	0	0	0	0	0	0	0	0	0	0
2219121	260000	1360000	1380000	1140000	0	0	0	0	720000	1160000	1340000	0	0	2040000	0	0	0	0	0	0	1500000	0	0	0	0	0	0	0	0	0	0	0	0	0	0	0	0	1300000
10912535	0	1700000	1440000	2680000	0	0	0	0	1960000	0	0	0	0	0	0	1860000	0	0	0	0	1220000	0	0	0	0	0	0	0	0	0	0	0	0	0	0	0	0	0
11684435	0	1360000	1100000	1800000	0	0	0	0	1040000	0	0	0	0	0	0	1180000	0	0	0	0	1420000	0	0	0	0	0	0	0	0	0	0	0	0	0	0	0	0	0
1030220495	0	1100000	1140000	40000	1020000	0	0	0	1280000	1040000	1180000	1760000	1580000	1860000	0	1580000	1780000	0	0	0	1380000	2200000	0	0	0	0	0	0	0	0	0	1180000	0	0	1920000	0	0	1360000
1025925329	260000	1360000	1440000	2280000	1280000	40000	0	0	1540000	1160000	1440000	1280000	0	2260000	0	1480000	1500000	0	0	0	1560000	2040000	320000	0	0	0	0	0	0	1320000	1080000	1420000	1300000	2140000	2180000	840000	1500000	1580000
1028879973	280000	1420000	1380000	2360000	0	0	0	0	0	0	0	0	0	80000	0	60000	0	0	0	0	1580000	0	0	0	0	0	0	0	0	0	0	0	0	0	0	0	0	0
1027159915	280000	60000	1460000	300000	0	0	0	0	0	0	0	0	0	0	0	0	0	0	0	0	560000	0	0	0	0	0	0	0	0	0	0	0	0	0	0	0	0	0
1027185622	0	720000	800000	1140000	620000	1000000	400000	600000	860000	580000	0	980000	1200000	0	500000	820000	740000	540000	500000	1100000	880000	1180000	660000	860000	760000	700000	520000	0	40000	680000	600000	700000	680000	1020000	1100000	580000	660000	0
10557019	0	1400000	1360000	980000	1340000	60000	820000	900000	280000	1340000	0	0	0	2560000	820000	0	1540000	1000000	1440000	20000	3520000	280000	1460000	2240000	640000	2980000	1440000	2680000	2200000	1760000	760000	1720000	1320000	940000	2340000	1160000	2040000	0
1019345706	120000	1360000	1380000	2260000	0	0	0	0	1480000	0	0	0	0	0	0	1480000	0	0	0	0	1480000	0	0	0	0	0	0	0	0	0	0	0	0	0	0	0	0	0
1032598295	0	1580000	1460000	2240000	0	0	0	0	0	0	0	0	0	0	0	1200000	0	0	0	0	1400000	0	0	0	0	0	0	0	0	0	0	0	0	0	0	0	0	0
1021595344	220000	1100000	1100000	1860000	0	0	0	0	1180000	0	0	0	0	0	0	1180000	0	0	0	0	1360000	0	0	0	0	0	0	0	0	0	0	0	0	0	0	0	0	0
1025442943	220000	1340000	1380000	1940000	0	0	0	0	1400000	0	0	0	0	60000	0	1700000	0	0	0	0	20000	0	0	0	0	0	0	0	0	0	0	0	0	0	0	0	0	0
1028967900	260000	1400000	1520000	2580000	0	0	0	0	1880000	1000000	1240000	0	0	2200000	0	1540000	0	0	0	0	1200000	0	0	0	0	0	0	0	0	0	0	0	0	0	740000	0	0	1400000
1025420653	0	0	20000	2040000	0	0	0	0	1640000	0	0	0	0	1360000	0	1740000	0	0	0	0	100000	0	0	0	0	0	0	0	0	0	0	0	0	0	0	0	0	0
1025794257	120000	1060000	1500000	2240000	0	0	0	0	360000	0	0	0	0	0	0	1520000	0	0	0	0	1180000	0	0	0	0	0	0	0	0	0	0	0	0	0	0	0	0	0
1029709992	280000	1520000	1900000	2340000	1320000	0	0	0	1760000	1260000	1720000	0	0	2520000	0	1380000	1500000	0	0	0	1660000	0	0	0	0	0	0	0	0	0	0	1440000	0	0	2280000	0	0	2200000
1031512218	260000	1500000	1380000	2360000	1520000	0	0	0	1780000	1160000	1580000	1800000	1020000	2440000	0	1800000	1540000	0	0	0	1720000	2140000	0	0	0	0	0	0	0	0	0	20000	0	0	2300000	0	0	1740000
1031447721	0	100000	20000	0	0	0	0	0	0	0	0	0	0	0	0	0	0	0	0	0	340000	0	0	0	0	0	0	0	0	0	0	0	0	0	0	0	0	0
1020311541	220000	1600000	1500000	0	0	0	0	0	0	0	0	0	0	0	0	0	0	0	0	0	1380000	0	0	0	0	0	0	0	0	0	0	0	0	0	0	0	0	0
1019900721	260000	1840000	1440000	2300000	0	0	0	0	1540000	0	0	0	0	80000	0	1880000	0	0	0	0	1520000	0	0	0	0	0	0	0	0	0	0	0	0	0	0	0	0	0
1623215	340000	1340000	1240000	2080000	0	0	0	0	1200000	0	0	0	0	0	0	1080000	0	0	0	0	1780000	0	0	0	0	0	0	0	0	0	0	0	0	0	0	0	0	0
1030000176	0	1360000	80000	0	0	0	0	0	0	0	0	40000	0	0	0	0	0	0	0	0	0	80000	0	0	0	0	0	0	0	0	0	0	0	0	0	0	0	0
1029921857	300000	1420000	860000	0	0	0	0	0	0	0	0	0	0	0	0	0	0	0	0	0	1480000	0	0	0	0	0	0	0	0	0	0	0	0	0	0	0	0	0
1029495736	260000	840000	1440000	2240000	0	0	0	0	1520000	1240000	1440000	1680000	820000	2280000	2020000	1480000	40000	0	0	40000	1500000	2040000	0	2060000	1760000	2380000	3620000	2380000	2080000	0	0	0	0	0	1420000	0	0	1560000
10410040	140000	1100000	700000	240000	0	0	0	0	680000	560000	740000	0	0	1140000	0	760000	0	0	0	0	1560000	0	0	0	0	0	0	0	500000	0	0	0	0	0	0	0	0	660000
1030116864	260000	1440000	1460000	2240000	1020000	1600000	580000	840000	1560000	1160000	1440000	1380000	1540000	2400000	0	1680000	1260000	800000	700000	1520000	1640000	1640000	880000	0	0	0	0	20000	1360000	1060000	740000	1440000	1200000	1360000	2300000	580000	1040000	1580000
1029828107	0	1100000	700000	1260000	0	0	0	0	520000	0	0	0	0	60000	0	1140000	0	0	0	0	1200000	0	0	0	0	0	0	0	0	0	0	0	0	0	0	0	0	0
1026721964	260000	1700000	2080000	1500000	0	0	0	0	0	0	0	0	0	0	0	0	0	0	0	0	1420000	0	0	0	0	0	0	0	0	0	0	0	0	0	0	0	0	0
1021507123	60000	880000	920000	1380000	0	0	0	0	900000	780000	1140000	0	0	460000	0	200000	0	0	0	0	840000	0	0	0	0	0	0	0	0	0	0	0	0	0	800000	0	0	1060000
1026190643	160000	80000	700000	1240000	1260000	1940000	760000	1480000	60000	1140000	1500000	1740000	1940000	2380000	0	1700000	1480000	960000	1060000	2220000	300000	1980000	1200000	0	0	0	0	0	0	1340000	1140000	1480000	1380000	1540000	2340000	860000	1300000	1660000
1029568489	120000	940000	220000	760000	0	0	0	0	0	0	0	0	0	0	0	0	0	0	0	0	660000	0	0	0	0	0	0	0	0	0	0	0	0	0	0	0	0	0
1029283946	0	0	620000	1140000	0	0	0	0	0	0	0	0	0	0	0	0	0	0	0	0	0	0	0	0	0	0	0	0	0	0	0	0	0	0	0	0	0	0
1029784764	20000	1040000	620000	0	0	0	0	0	0	0	0	0	0	0	0	0	0	0	0	0	1360000	0	0	0	0	0	0	0	0	0	0	0	0	0	0	0	0	0
1031154803	0	0	1440000	140000	0	0	0	0	0	0	0	0	0	0	0	0	0	0	0	0	0	0	0	0	0	0	0	0	0	0	0	0	0	0	0	0	0	0
1030079802	400000	1300000	1420000	1740000	740000	0	0	0	2680000	1040000	1580000	1240000	0	2060000	0	1620000	1020000	0	0	0	1620000	1180000	0	0	0	0	0	0	0	0	0	940000	0	0	3260000	0	0	1040000
1022779901	0	20000	600000	1600000	760000	0	0	0	560000	780000	680000	0	0	1040000	0	1100000	0	0	0	0	0	0	0	0	0	0	0	0	0	0	0	1720000	0	0	1460000	0	0	800000
11152802	260000	1360000	1380000	140000	0	0	0	0	0	0	0	0	0	0	0	0	0	0	0	0	1500000	0	0	0	0	0	0	0	0	0	0	0	0	0	0	0	0	0
1029583930	180000	940000	1140000	1380000	0	0	0	0	500000	960000	780000	0	0	1160000	0	900000	0	0	0	0	900000	0	0	0	0	0	0	0	0	0	0	0	0	0	1720000	0	0	900000
1030632672	20000	1600000	2020000	2780000	1900000	1560000	580000	940000	1920000	1880000	2200000	2200000	2760000	3580000	1320000	1640000	2220000	840000	880000	1480000	1380000	3000000	1040000	1080000	1500000	1220000	1480000	1980000	1740000	900000	920000	2040000	860000	1420000	3140000	620000	940000	2360000
1029721473	220000	1360000	1380000	2260000	0	0	0	0	1480000	0	0	0	0	0	0	1400000	0	0	0	0	1300000	0	0	0	0	0	0	0	0	0	0	0	0	0	0	0	0	0
1014619851	0	1180000	300000	1420000	0	0	0	0	1160000	0	1440000	0	0	2240000	0	1020000	0	0	0	0	1200000	0	0	0	0	0	0	0	0	0	0	0	0	0	0	0	0	1480000
1029789534	0	1320000	1580000	1680000	0	0	0	0	0	0	0	0	0	0	0	0	0	0	0	0	1360000	0	0	0	0	0	0	0	0	0	0	0	0	0	0	0	0	0
1019145759	0	0	40000	120000	0	0	0	0	1040000	0	0	0	0	0	0	1140000	0	0	0	0	0	0	0	0	0	0	0	0	0	0	0	0	0	0	0	0	0	0
1024921443	0	1360000	1380000	2060000	0	0	0	0	960000	260000	1360000	0	0	1440000	0	660000	0	0	0	0	1500000	0	0	0	0	0	0	0	0	0	0	0	0	0	680000	0	0	1200000
1025182485	0	1440000	1320000	2160000	0	0	0	0	420000	0	0	0	0	480000	0	1340000	0	0	0	0	1520000	0	0	0	0	0	0	0	0	0	0	0	0	0	0	0	0	0
1029720861	0	0	1320000	100000	0	0	0	0	0	0	0	0	0	0	0	0	0	0	0	0	0	0	0	0	0	0	0	0	0	0	0	0	0	0	0	0	0	0
1029819134	0	1420000	1440000	1060000	0	0	0	0	40000	0	0	0	0	1200000	0	0	0	0	0	0	1320000	0	0	0	0	0	0	0	0	0	0	0	0	0	0	0	0	0
1028021938	0	1340000	20000	0	0	0	0	0	0	0	0	0	0	0	0	0	0	0	0	0	1320000	0	0	0	0	0	0	0	0	0	0	0	0	0	0	0	0	0
1018466439	340000	1160000	960000	1720000	0	0	0	0	380000	0	0	0	0	0	0	280000	0	0	0	0	980000	0	0	0	0	0	0	0	0	0	0	0	0	0	0	0	0	0
1019019247	140000	700000	700000	1140000	0	980000	0	0	780000	600000	740000	860000	960000	1140000	0	760000	0	0	0	0	760000	340000	0	0	0	0	0	0	0	660000	540000	0	660000	0	20000	440000	660000	800000
1031912254	80000	1380000	1420000	1460000	0	0	0	0	0	0	0	0	0	0	0	60000	0	0	0	0	1500000	0	0	0	0	0	0	0	0	0	0	0	0	0	0	40000	20000	0
1028941353	0	940000	1140000	1580000	860000	1340000	0	0	1020000	0	940000	1160000	1280000	1380000	0	1000000	1060000	0	220000	0	320000	1500000	780000	0	0	0	0	0	0	940000	720000	1000000	880000	1420000	1260000	580000	960000	1120000
1019037265	280000	1360000	1380000	220000	0	0	0	0	0	0	0	0	0	0	0	0	0	0	0	0	1540000	0	0	0	0	0	0	0	0	0	0	0	0	0	0	0	0	0
1031113394	0	2440000	1340000	20000	0	0	0	0	0	0	0	0	0	1860000	0	0	0	0	0	0	1400000	0	0	0	0	0	0	0	0	0	0	0	0	0	0	0	0	0
1019909979	0	40000	1000000	0	0	0	0	0	0	0	0	0	0	0	0	0	0	0	0	0	0	0	0	0	0	0	0	0	0	0	0	0	0	0	0	0	0	0
1027290702	0	260000	1520000	2240000	0	0	0	0	0	0	0	0	0	0	0	1300000	0	0	0	0	180000	0	0	0	0	0	0	0	0	0	0	0	0	0	0	0	0	0
1031925766	0	1040000	920000	200000	0	0	0	0	0	0	0	0	0	0	0	0	0	0	0	0	840000	0	0	0	0	0	0	0	0	0	0	0	0	0	0	0	0	0
1023014429	260000	1340000	1140000	1580000	0	0	0	0	1180000	1180000	1520000	0	0	2160000	0	1440000	0	0	0	0	2020000	0	0	0	0	0	0	0	0	0	0	0	0	0	1860000	0	0	1800000
3391730	180000	1020000	40000	0	0	0	0	0	0	1180000	1440000	0	0	440000	0	0	0	0	0	0	1080000	0	0	0	0	0	0	0	0	0	0	20000	0	0	2160000	0	0	1580000
1024924644	0	1420000	1480000	2280000	0	0	0	0	0	0	0	0	0	0	0	20000	0	0	0	0	1500000	0	0	0	0	0	0	0	0	0	0	0	0	0	0	0	0	0
1029619095	260000	1000000	820000	0	1400000	0	0	0	0	1360000	1440000	0	0	2120000	0	0	2140000	0	0	0	1520000	0	0	0	0	0	0	0	0	0	0	1980000	0	0	2260000	0	0	1580000
1030502344	0	1420000	100000	0	0	0	0	0	0	0	0	0	0	0	0	0	0	0	0	0	1320000	0	0	0	0	0	0	0	0	0	0	0	0	0	0	0	0	0
1017520824	240000	1380000	1360000	2260000	1260000	1940000	500000	1220000	1500000	1160000	1480000	1680000	1900000	2300000	120000	600000	1480000	860000	740000	2220000	1480000	2040000	1160000	2100000	1700000	2480000	1900000	2380000	1840000	1320000	1060000	1500000	1280000	2060000	2180000	860000	1280000	1600000
641997	180000	1340000	20000	0	0	0	0	0	0	0	0	0	0	0	0	0	0	0	0	0	960000	0	0	0	0	0	0	0	0	0	0	0	0	0	0	0	0	0
1032288129	0	1140000	1320000	400000	0	0	680000	520000	0	0	780000	20000	0	1340000	0	0	0	960000	960000	280000	900000	0	1260000	0	120000	0	160000	1140000	1460000	0	0	0	0	1540000	0	0	0	0
1026762569	0	0	40000	0	0	0	0	0	0	0	0	0	0	0	0	0	0	0	0	0	60000	0	0	0	0	0	0	0	0	0	0	0	0	0	0	0	0	0
1025551696	200000	2720000	2660000	4180000	2240000	3940000	2120000	2680000	3080000	2220000	2760000	4260000	4180000	3880000	4040000	2840000	2840000	2920000	2940000	4620000	2560000	3900000	3300000	3980000	3560000	4780000	3540000	4520000	4040000	2580000	1680000	2960000	1900000	3380000	4280000	1200000	2600000	3360000
1029162443	300000	1180000	1140000	2020000	0	0	0	0	1060000	0	0	0	0	700000	0	1260000	0	0	0	0	1720000	0	0	0	0	0	0	0	0	0	0	0	0	0	0	0	0	0
1024071463	160000	920000	20000	0	0	0	0	0	0	0	0	0	0	0	0	0	0	0	0	0	840000	0	0	0	0	0	0	0	0	0	0	0	0	0	0	0	0	0
1029717948	0	1400000	1360000	2280000	0	0	0	0	0	0	0	0	0	0	0	60000	0	0	0	0	1360000	0	0	0	0	0	0	0	0	0	0	0	0	0	0	0	0	0
1024333260	0	0	760000	2000000	0	0	0	0	0	0	0	0	0	0	0	0	0	0	0	0	0	0	0	0	0	0	0	0	0	0	0	0	0	0	0	0	0	0
1032828772	260000	1540000	1560000	2500000	0	0	0	0	0	0	0	0	0	0	0	760000	0	0	0	0	1500000	0	0	0	0	0	0	0	0	0	0	0	0	0	0	0	0	0
1023812986	0	4220000	1320000	11240000	0	0	0	0	20000	0	0	0	0	4380000	0	5360000	0	0	0	0	1500000	0	0	0	0	0	0	0	0	0	0	0	0	0	0	0	0	0
1027942261	240000	1220000	1180000	2160000	0	0	0	0	0	0	0	0	0	0	0	1180000	0	0	0	0	1540000	0	0	0	0	0	0	0	0	0	0	0	0	0	0	0	0	0
1027884178	0	1560000	1660000	1340000	1100000	1960000	740000	1700000	1900000	1100000	1300000	1920000	2600000	2320000	2920000	2260000	1400000	840000	900000	2400000	1120000	3400000	1100000	2420000	1960000	2760000	2140000	2360000	2180000	1160000	1200000	1140000	1060000	3140000	1960000	740000	2520000	1380000
1019071342	360000	1420000	1380000	2240000	0	0	0	0	0	0	0	0	0	0	0	60000	0	0	0	0	1740000	0	0	0	0	0	0	0	0	0	0	0	0	0	0	0	0	0
1021683364	0	360000	20000	0	0	0	0	0	0	0	0	0	0	0	0	0	0	0	0	0	0	0	0	0	0	0	0	0	0	0	0	0	0	0	0	0	0	0
1029486277	120000	1460000	1380000	1860000	0	0	0	0	1180000	0	0	0	0	0	0	1300000	0	0	0	0	1440000	0	0	0	0	0	0	0	0	0	0	0	0	0	0	0	0	0
1017250424	260000	1400000	1460000	2400000	1240000	500000	0	0	1640000	1180000	1440000	1720000	2120000	2440000	0	1400000	1480000	0	0	0	1300000	2000000	0	0	0	0	0	0	0	0	0	1040000	0	0	2260000	0	0	1640000
11463528	260000	1360000	1380000	2240000	640000	0	0	620000	480000	600000	1480000	700000	480000	2000000	920000	1480000	420000	0	0	1080000	1500000	380000	0	1040000	800000	1200000	860000	1180000	1040000	0	0	720000	0	0	1100000	0	0	1400000
1027314183	260000	1340000	1360000	2240000	1240000	2000000	0	0	1500000	1480000	1440000	1720000	1880000	2280000	0	1500000	1540000	0	0	0	1520000	1980000	0	0	0	0	0	0	0	0	0	1420000	0	0	2540000	0	320000	100000
1024666351	260000	1040000	520000	0	0	0	0	0	0	0	0	0	0	0	0	0	0	0	0	0	1560000	0	0	0	0	0	0	0	0	0	0	0	0	0	0	0	0	0
1030770006	0	1380000	40000	0	0	0	0	0	1260000	0	880000	0	0	1460000	0	1320000	0	0	0	0	1200000	0	0	0	0	0	0	0	0	0	0	0	0	0	0	0	0	460000
1032831589	100000	1540000	1220000	900000	0	0	0	0	2140000	0	0	0	0	0	0	1800000	0	0	0	0	1840000	0	0	0	0	0	0	0	0	0	0	0	0	0	0	0	0	0
1028210538	260000	1520000	1380000	2420000	1280000	2360000	780000	1200000	1940000	1320000	0	2100000	2800000	0	0	1720000	1020000	980000	1100000	640000	1740000	2020000	1220000	0	0	0	0	0	0	1400000	1060000	1600000	1520000	3260000	2920000	1240000	1400000	0
1029140162	140000	1560000	1300000	2240000	1380000	4000000	680000	520000	1860000	1200000	1600000	2900000	4020000	2380000	2780000	1540000	3040000	1000000	1040000	720000	1900000	4080000	1420000	2260000	1780000	2480000	2000000	2680000	2600000	1220000	1280000	1400000	1280000	2060000	2220000	860000	1260000	1640000
1028396375	80000	1580000	140000	20000	0	0	0	0	0	0	0	0	0	0	0	0	0	0	0	0	1380000	0	0	0	0	0	0	0	0	0	0	0	0	0	0	0	0	0
8415714	100000	920000	1060000	1680000	0	0	0	0	860000	0	0	0	0	100000	0	0	0	0	0	0	560000	0	0	0	0	0	0	0	0	0	0	0	0	0	0	0	0	0
1027254256	60000	1140000	1120000	2120000	0	0	0	0	80000	0	0	0	0	1160000	0	180000	0	0	0	0	1400000	0	0	0	0	0	0	0	0	0	0	0	0	0	0	0	0	20000
1017174047	160000	900000	1400000	2280000	0	0	0	0	1520000	1180000	780000	0	0	1040000	0	1520000	0	0	0	0	720000	0	0	0	0	0	0	0	0	0	0	140000	0	0	2160000	0	0	1480000
1030974158	20000	1380000	140000	0	0	0	0	0	0	0	0	0	0	0	0	0	0	0	0	0	1500000	0	0	0	0	0	0	0	0	0	0	0	0	0	0	0	0	0
1029054285	260000	1640000	1360000	2660000	0	0	0	0	1460000	0	0	0	0	0	0	1480000	0	0	0	0	1500000	0	0	0	0	0	0	0	0	0	0	0	0	0	0	0	0	0
1029674865	0	1100000	1280000	0	0	0	0	0	880000	0	0	0	0	0	0	0	0	0	0	0	60000	0	0	0	0	0	0	0	0	0	0	0	0	0	0	0	0	0
1024360824	300000	1180000	1480000	2280000	0	0	0	0	1520000	0	1420000	0	0	2320000	0	1460000	0	0	0	0	860000	0	0	0	0	0	0	0	0	0	0	0	0	0	2480000	0	0	1560000
1020829084	380000	820000	2260000	2820000	0	0	0	0	2820000	0	0	0	0	2140000	0	2280000	0	0	0	0	3580000	0	0	0	0	0	0	0	0	0	0	0	0	0	0	0	0	0
1019489936	0	1580000	1540000	1660000	1040000	1820000	0	0	0	0	1260000	1340000	2080000	1860000	0	0	1200000	0	0	0	80000	1900000	0	0	0	0	0	0	0	0	0	0	0	0	0	0	40000	1260000
1027865320	280000	20000	20000	60000	0	0	0	0	160000	0	0	0	0	0	0	60000	0	0	0	0	340000	0	0	0	0	0	0	0	0	0	0	0	0	0	0	0	0	0
1026709634	200000	1200000	1180000	2380000	0	0	0	0	680000	0	0	0	0	20000	0	1520000	0	0	0	0	1240000	0	0	0	0	0	0	0	0	0	0	0	0	0	0	0	0	0
1029663135	200000	1360000	60000	0	0	0	0	0	0	0	0	0	0	0	0	0	0	0	0	0	1520000	0	0	0	0	0	0	0	0	0	0	0	0	0	0	0	0	0
1030487632	20000	1360000	1920000	2640000	0	0	0	0	1600000	360000	1720000	0	0	2480000	0	1780000	0	0	0	0	1560000	0	0	0	0	0	0	0	0	0	0	0	0	0	0	0	0	2020000
1027862068	0	1620000	1400000	20000	0	0	0	0	0	0	0	0	0	0	0	0	0	0	0	0	1660000	0	0	0	0	0	0	0	0	0	0	0	0	0	0	0	0	0
2536499	0	2180000	1240000	560000	0	0	0	0	0	0	0	0	0	0	0	0	0	0	0	0	1620000	0	0	0	0	0	0	0	0	0	0	0	0	0	0	0	0	0
1027940461	0	1260000	1280000	1320000	1260000	660000	160000	160000	0	0	0	1680000	1880000	0	0	0	1480000	480000	580000	2680000	1400000	2020000	460000	0	1740000	0	1500000	2220000	2080000	1280000	680000	1440000	120000	1240000	2060000	540000	1280000	0
1021342070	0	1480000	1440000	1080000	0	0	0	0	380000	0	0	0	0	0	0	300000	0	0	0	0	1540000	0	0	0	0	0	0	0	0	0	0	0	0	0	0	0	0	0
1625765	80000	1440000	1380000	60000	0	0	0	0	0	0	0	0	0	0	0	0	0	0	0	0	1240000	0	0	0	0	0	0	0	0	0	0	0	0	0	0	0	0	0
1032815536	140000	920000	1160000	1520000	0	0	0	0	100000	0	0	0	0	0	0	1000000	0	0	0	0	1040000	0	0	0	0	0	0	0	0	0	0	0	0	0	0	0	0	0
1021316822	0	1420000	1380000	380000	0	0	0	0	0	0	0	0	0	0	0	0	0	0	0	0	1500000	0	0	0	0	0	0	0	0	0	0	0	0	0	0	0	0	0
1029658449	240000	1360000	680000	0	0	0	0	0	0	0	0	0	0	0	0	0	0	0	0	0	1500000	0	0	0	0	0	0	0	0	0	0	0	0	0	0	0	0	0
1020318975	320000	680000	700000	20000	1060000	6060000	480000	660000	1200000	1700000	2560000	2360000	2640000	2700000	0	1360000	1120000	560000	20000	1160000	2200000	2960000	640000	920000	780000	740000	580000	1900000	1320000	580000	660000	1060000	940000	1080000	2600000	560000	660000	2300000
1031409156	0	1740000	1380000	2340000	0	0	0	0	0	1220000	1280000	0	0	2720000	0	20000	0	0	0	0	1740000	0	0	0	0	0	0	0	0	0	0	0	0	0	560000	0	0	0
802433	200000	1560000	1520000	2260000	0	0	0	0	0	0	1380000	0	0	20000	0	200000	0	0	0	0	1220000	0	0	0	0	0	0	0	0	0	0	0	0	0	0	0	0	80000
1027911667	280000	1360000	1380000	2220000	1240000	2940000	380000	480000	1640000	1140000	700000	1700000	1980000	1340000	0	1560000	1480000	460000	0	1540000	1500000	5020000	540000	0	1280000	0	1480000	2320000	2800000	1420000	40000	1420000	1780000	40000	2160000	500000	2780000	1240000
1015880164	0	480000	580000	1300000	0	0	0	0	1140000	720000	760000	0	0	1320000	0	1040000	0	0	0	0	580000	0	0	0	0	0	0	0	0	0	0	20000	0	0	1740000	0	0	720000
3627130	0	660000	1040000	420000	0	0	0	0	0	0	0	0	0	0	0	0	0	0	0	0	0	0	0	0	0	0	0	0	0	0	0	0	0	0	0	0	0	0
4411648	200000	980000	960000	1500000	0	0	0	0	0	0	0	0	0	0	0	540000	0	0	0	0	1000000	0	0	0	0	0	0	0	0	0	0	0	0	0	0	0	0	0
1029124007	220000	1360000	1340000	3140000	0	0	0	0	1940000	0	1300000	0	0	2860000	0	2000000	0	0	0	0	1860000	0	0	0	0	0	0	0	0	0	0	0	0	0	0	0	0	1760000
1027923826	320000	1440000	1860000	2440000	640000	1920000	0	0	80000	840000	1480000	1760000	1700000	1180000	0	0	360000	0	0	0	1620000	2040000	0	0	0	0	0	0	0	0	0	1820000	0	0	1380000	0	500000	1440000
805436	200000	1720000	40000	0	0	0	0	0	0	0	0	0	0	0	0	0	0	0	0	0	1480000	0	0	0	0	0	0	0	0	0	0	0	0	0	0	0	0	0
1020854242	140000	700000	740000	1280000	0	0	0	0	860000	0	0	0	0	580000	0	820000	0	0	0	0	860000	0	0	0	0	0	0	0	0	0	0	0	0	0	0	0	0	0
1019594993	0	1080000	580000	1640000	0	0	0	0	1440000	0	0	0	0	0	0	1500000	0	0	0	0	1820000	0	0	0	0	0	0	0	0	0	0	0	0	0	0	0	0	0
1023688880	0	0	60000	440000	0	0	0	0	0	0	0	0	0	0	0	0	0	0	0	0	0	0	0	0	0	0	0	0	0	0	0	0	0	0	0	0	0	0
3080553	200000	1180000	1620000	2360000	0	0	0	0	2100000	0	1120000	0	0	2500000	0	1860000	0	0	0	0	2020000	0	0	0	0	0	0	0	0	0	0	0	0	0	0	0	0	1400000
1029650937	260000	1520000	840000	0	0	0	0	0	0	0	0	0	0	0	0	0	0	0	0	0	1620000	0	0	0	0	0	0	0	0	0	0	0	0	0	0	0	0	0
1028929779	260000	1400000	1500000	980000	0	0	0	0	0	0	0	0	0	0	0	0	0	0	0	0	1800000	0	0	0	0	0	0	0	0	0	0	0	0	0	0	0	0	0
1029198143	220000	1460000	1460000	2500000	0	0	0	0	1820000	0	0	0	0	0	0	3180000	0	0	0	0	1560000	0	0	0	0	0	0	0	0	0	0	0	0	0	0	0	0	0
1031603394	280000	180000	380000	2420000	0	0	0	0	0	0	0	0	0	0	0	20000	0	0	0	0	1240000	0	0	0	0	0	0	0	0	0	0	0	0	0	0	0	0	0
1020296286	0	0	1700000	380000	0	0	0	0	0	0	0	0	0	0	0	0	0	0	0	0	0	0	0	0	0	0	0	0	0	0	0	0	0	0	0	0	0	0
1030586470	180000	1420000	1380000	1640000	0	0	0	0	0	0	0	0	0	0	0	0	0	0	0	0	1500000	0	0	0	0	0	0	0	0	0	0	0	0	0	0	0	0	0
1027221520	260000	1380000	1380000	2280000	0	0	0	0	1000000	0	0	0	0	2980000	0	1480000	0	0	0	0	3640000	0	0	0	0	0	0	0	0	0	0	0	0	0	0	0	0	0
10050831	0	460000	280000	880000	0	0	0	0	300000	360000	20000	0	0	240000	0	740000	0	0	0	0	680000	0	20000	0	0	0	0	0	0	0	0	0	0	0	280000	0	0	0
1023315522	320000	880000	20000	0	0	0	0	0	0	0	0	0	0	0	0	0	0	0	0	0	1500000	0	0	0	0	0	0	0	0	0	0	0	0	0	0	0	0	0
1029642000	0	1860000	500000	100000	0	0	0	0	0	900000	0	1620000	1820000	0	0	0	0	0	0	0	380000	2720000	0	0	0	0	0	0	0	0	0	0	0	0	20000	0	0	0
1019457122	260000	1360000	1380000	2240000	1240000	0	0	0	620000	1160000	0	0	0	0	0	1480000	1500000	0	0	0	1500000	1740000	0	0	0	0	0	0	0	0	0	1400000	0	0	2260000	0	0	0
1030134341	260000	1120000	1400000	2200000	0	0	0	0	1560000	1400000	1180000	0	0	1820000	0	640000	0	0	0	0	1500000	0	0	0	0	0	0	0	0	0	0	80000	0	0	1860000	0	0	1300000
1029458494	120000	1400000	1360000	2220000	1280000	1100000	0	0	1560000	1220000	1300000	20000	3020000	1920000	0	1500000	1560000	0	0	0	1360000	2040000	0	0	0	0	0	0	0	180000	0	1400000	0	0	2260000	0	1020000	1460000
1032265962	180000	800000	800000	1500000	0	0	0	0	0	0	0	0	0	0	0	20000	0	0	0	0	1000000	0	0	0	0	0	0	0	0	0	0	0	0	0	0	0	0	0
499240	60000	1240000	1220000	740000	0	0	0	0	0	0	0	0	0	80000	0	0	0	0	0	0	1020000	0	0	0	0	0	0	0	0	0	0	0	0	0	0	0	0	0
1024707007	120000	1600000	440000	900000	0	0	0	0	1140000	420000	1000000	0	0	1600000	0	0	0	0	0	0	1240000	0	0	0	0	0	0	0	0	0	0	0	0	0	0	0	0	1380000
12583724	100000	1380000	1380000	1700000	0	0	0	0	0	0	0	0	0	0	0	0	0	0	0	0	1500000	0	0	0	0	0	0	0	0	0	0	0	0	0	0	0	0	0
1019207532	240000	740000	820000	1040000	0	0	0	0	1440000	0	20000	0	0	1920000	0	1180000	0	0	0	0	1980000	0	0	0	0	0	0	0	0	0	0	0	0	0	0	0	0	0
1028301038	0	300000	1100000	800000	0	0	0	0	0	0	0	0	0	0	0	0	0	0	0	0	0	0	0	0	0	0	0	0	0	0	0	0	0	0	0	0	0	0
1027830340	0	1360000	1380000	2240000	0	0	0	0	640000	0	0	0	0	0	0	1240000	0	0	0	0	1520000	0	0	0	0	0	0	0	0	0	0	0	0	0	0	0	0	0
1017341089	0	880000	1400000	2300000	0	0	0	0	1520000	940000	1420000	0	0	2260000	0	2240000	0	0	0	0	1000000	0	0	0	0	0	0	0	0	0	0	0	0	0	220000	0	0	1540000
1022600166	120000	1380000	1420000	1520000	1060000	0	0	0	1560000	1200000	1460000	0	0	2260000	0	980000	1460000	0	0	0	2720000	820000	0	0	40000	0	0	0	0	0	1060000	1020000	0	40000	1100000	720000	0	1560000
1023638948	0	20000	20000	0	0	0	0	0	0	0	0	0	0	20000	0	0	0	0	0	0	20000	0	0	0	0	0	0	0	0	0	0	0	0	0	0	0	0	0
1031115776	120000	1660000	1400000	800000	1040000	1920000	740000	900000	0	1280000	1700000	0	0	2600000	0	0	1200000	420000	540000	1080000	1760000	1720000	920000	20000	1560000	0	1500000	2420000	1860000	1080000	880000	1280000	1080000	1580000	2120000	740000	1940000	1800000
1029119900	0	1080000	1460000	1020000	0	0	0	0	0	0	0	0	0	0	0	0	0	0	0	0	1080000	0	0	0	0	0	0	0	0	0	0	0	0	0	0	0	0	0
1029370480	420000	1360000	1400000	2120000	0	0	0	0	1580000	0	0	0	0	0	0	1480000	0	0	0	0	1540000	0	0	0	0	0	0	0	0	0	0	0	0	0	0	0	0	0
1029117179	240000	1380000	1420000	2380000	40000	1980000	0	0	1140000	1140000	1180000	1680000	20000	2160000	0	1540000	1780000	0	0	0	1620000	2060000	0	0	0	0	0	0	0	1040000	20000	1440000	1180000	0	2160000	420000	1400000	1400000
1017146408	0	760000	720000	760000	0	0	0	0	660000	0	780000	0	0	1200000	0	740000	0	0	0	0	740000	0	0	0	0	0	0	0	0	0	0	0	0	0	0	0	0	220000
1032519830	380000	1620000	920000	20000	0	0	0	0	1540000	1280000	1740000	0	0	2320000	0	580000	0	0	0	0	1520000	0	0	0	0	0	0	0	0	0	0	20000	0	0	2160000	0	0	1720000
1023784364	20000	600000	740000	1180000	180000	0	0	0	340000	1140000	0	0	0	0	0	600000	0	0	0	0	1660000	0	0	0	0	0	0	0	0	0	0	1240000	0	0	2060000	0	0	400000
1015727854	260000	1160000	920000	0	0	0	0	0	420000	0	0	0	0	0	0	1200000	0	0	0	0	1400000	0	0	0	0	0	0	0	0	0	0	0	0	0	0	0	0	0
1015356315	160000	1500000	1380000	2240000	1060000	800000	480000	700000	2420000	560000	1460000	1680000	2020000	2380000	1180000	1580000	1480000	580000	600000	1280000	1520000	2040000	700000	1260000	1020000	1400000	1080000	1360000	1180000	940000	720000	1280000	860000	1340000	2020000	580000	980000	1640000
12253944	260000	1780000	140000	1160000	0	0	0	0	0	0	0	0	0	0	0	0	0	0	0	0	1600000	0	0	0	0	0	0	0	0	0	0	0	0	0	0	0	0	0
1031219461	140000	1040000	920000	1700000	480000	0	0	0	1140000	900000	1100000	0	0	1560000	0	1180000	160000	0	0	0	1440000	0	0	0	0	0	0	0	0	0	0	0	0	0	1200000	0	0	1760000
1029547921	240000	1320000	1380000	2320000	0	0	0	0	1300000	0	0	0	0	80000	0	1360000	0	0	0	0	1540000	0	0	0	0	0	0	0	0	0	0	0	0	0	0	0	0	0
1030312505	0	1460000	1380000	1020000	0	0	0	0	20000	0	0	0	0	280000	0	20000	0	0	0	0	1320000	0	0	0	0	0	0	0	0	0	0	0	0	0	0	0	0	0
1028132034	400000	1460000	1380000	2280000	0	0	0	0	1380000	1180000	0	0	0	0	0	1360000	0	0	0	0	1580000	0	0	0	0	0	0	0	0	0	0	20000	0	0	2100000	0	0	1140000
10914032	180000	1120000	1040000	1580000	820000	1260000	560000	40000	1020000	800000	980000	1120000	1260000	1560000	60000	1200000	940000	80000	720000	40000	1180000	2000000	140000	40000	60000	60000	20000	40000	60000	40000	60000	940000	40000	20000	1500000	60000	540000	1060000
1017571929	280000	1520000	1140000	120000	1240000	0	0	0	20000	1160000	1600000	0	0	2560000	0	0	1680000	0	0	0	1820000	0	60000	0	0	0	0	0	0	1200000	1060000	1460000	1280000	2100000	2240000	900000	0	1820000
1021795065	20000	20000	1080000	2060000	1260000	0	0	0	1520000	1180000	1520000	0	0	2440000	0	1560000	1540000	0	0	0	40000	20000	0	0	0	0	0	0	0	0	0	1420000	0	0	2240000	0	0	1700000
11055086	260000	1360000	1360000	0	0	0	0	0	0	0	0	0	0	0	0	0	0	0	0	0	1500000	0	0	0	0	0	0	0	0	0	0	0	0	0	0	0	0	0
1022242766	0	1140000	1120000	420000	0	0	0	0	0	0	0	0	0	0	0	0	0	0	0	0	1320000	0	0	0	0	0	0	0	0	0	0	0	0	0	0	0	0	0
1032121282	0	1120000	220000	40000	0	0	0	0	20000	0	0	0	0	0	0	360000	0	0	0	0	1400000	0	0	0	0	0	0	0	20000	0	0	0	0	0	0	0	0	0
1029326348	260000	1200000	1160000	1960000	960000	1420000	0	0	40000	1100000	1280000	1160000	1360000	1920000	0	1420000	1200000	0	0	0	1260000	1480000	0	0	0	0	0	0	0	20000	0	1380000	0	0	1820000	0	900000	1360000
1018359429	360000	620000	600000	0	0	0	0	0	0	0	0	0	0	0	0	0	0	0	0	0	960000	0	0	0	0	0	0	0	0	0	0	0	0	0	0	0	0	0
1021183866	160000	1360000	2860000	5100000	0	0	0	0	2320000	1180000	1600000	0	0	1900000	0	2820000	0	0	0	0	1600000	0	0	0	0	0	0	0	0	0	0	560000	0	0	2140000	0	0	1640000
1029059118	300000	1380000	1400000	2560000	0	0	0	0	1700000	120000	1640000	0	0	1620000	0	1500000	0	0	0	0	1580000	0	0	0	0	0	0	0	0	0	0	0	0	0	0	0	0	1620000
1019430008	20000	1240000	900000	1560000	0	0	0	0	60000	0	0	0	0	20000	0	1120000	0	0	0	0	1400000	0	0	0	0	0	0	0	0	0	0	0	0	0	0	0	0	0
1029109226	300000	1360000	180000	0	0	0	0	0	0	0	0	0	0	0	0	0	0	0	0	0	1560000	0	0	0	0	0	0	0	0	0	0	0	0	0	0	0	0	0
1032866374	320000	880000	440000	0	0	980000	0	0	0	0	0	680000	960000	0	0	0	760000	0	0	0	1100000	580000	0	0	0	0	0	0	0	0	0	0	0	0	0	0	100000	0
1021596127	280000	1540000	1460000	2920000	0	2280000	780000	1620000	2580000	1260000	1560000	1740000	1960000	2700000	0	1660000	0	620000	1000000	3080000	1820000	2240000	660000	0	0	0	0	0	0	1320000	1060000	0	1320000	2020000	1820000	840000	1400000	1740000
3369812	220000	960000	960000	1480000	400000	3320000	780000	1200000	540000	0	0	580000	860000	0	40000	1000000	740000	980000	1120000	2240000	1020000	740000	1200000	2180000	2760000	2420000	1060000	3020000	2100000	1460000	1060000	960000	1280000	2060000	0	840000	2560000	0
1029788418	0	1200000	1340000	1520000	860000	0	0	0	1860000	1020000	1460000	0	0	2240000	0	0	1320000	0	0	0	1460000	0	0	0	0	0	0	0	0	0	0	1380000	0	0	1880000	0	0	1320000
12734203	120000	1360000	1420000	2440000	0	0	0	0	0	0	0	0	0	0	0	1640000	0	0	0	0	1540000	0	0	0	0	0	0	0	0	0	0	0	0	0	0	0	0	0
1028713732	260000	1420000	1500000	1900000	0	0	0	0	1100000	0	0	0	0	0	0	1180000	0	0	0	0	1540000	0	0	0	0	0	0	0	0	0	0	0	0	0	0	0	0	0
1032747358	260000	1360000	1380000	1240000	0	0	0	0	0	0	0	0	0	0	0	0	0	0	0	0	1500000	0	0	0	0	0	0	0	0	0	0	0	0	0	0	0	0	0
1019405150	260000	1420000	1520000	2340000	0	0	0	0	300000	0	0	0	0	0	0	1760000	0	0	0	0	1620000	0	0	0	0	0	0	0	0	0	0	0	0	0	0	0	0	0
950336	220000	1580000	1420000	2340000	0	0	0	0	0	0	0	0	0	0	0	760000	0	0	0	0	1520000	0	0	0	0	0	0	0	0	0	0	0	0	0	0	0	0	0
1018984225	260000	1380000	1420000	2360000	0	0	0	0	0	980000	1440000	0	0	2320000	0	60000	0	0	0	0	1500000	0	0	0	0	0	0	0	0	0	0	0	0	0	0	0	0	1580000
1020694093	40000	1960000	1520000	2700000	0	0	0	0	2040000	0	1360000	0	0	2180000	0	1640000	0	0	0	0	1580000	0	0	0	0	0	0	0	0	0	0	0	0	0	0	0	0	2100000
4903871	280000	1600000	1380000	2280000	0	0	0	0	1580000	1240000	1540000	0	0	2360000	0	1500000	0	0	20000	0	1500000	0	0	0	0	0	0	0	0	0	0	0	0	0	1640000	0	0	1580000
1028369627	160000	940000	1160000	1140000	0	0	0	0	1160000	0	0	0	0	40000	0	980000	0	0	0	0	940000	0	0	0	0	0	0	0	0	0	0	0	0	0	0	0	0	0
1018635260	260000	1320000	1400000	2300000	0	0	0	0	1520000	0	1420000	0	0	2340000	0	1520000	0	0	0	0	1500000	0	0	0	0	0	0	0	0	0	0	0	0	0	0	0	0	740000
1030819596	120000	1100000	1140000	1880000	620000	0	0	0	1260000	1160000	1440000	0	0	2380000	0	1520000	0	0	0	0	1260000	0	0	0	0	0	0	0	0	0	0	1780000	0	0	2240000	0	0	1600000
1018855462	260000	1420000	1380000	2260000	1240000	0	0	0	80000	1160000	1440000	0	0	1880000	0	1600000	1500000	0	0	0	1540000	0	0	0	0	0	0	0	0	0	0	1400000	0	0	2160000	0	0	1940000
1032706603	0	480000	1420000	2240000	0	0	0	0	1500000	0	0	0	0	1500000	0	1480000	0	0	0	0	0	0	0	0	0	0	0	0	0	0	0	0	0	0	0	0	0	0
1014702812	0	1360000	1400000	1080000	0	0	0	0	0	0	0	0	0	0	0	0	0	0	0	0	1640000	0	0	0	0	0	0	0	0	0	0	0	0	0	0	0	0	0
10828812	120000	600000	240000	460000	0	0	0	0	120000	0	1440000	0	0	80000	0	20000	0	0	0	0	1600000	0	0	0	0	0	0	0	0	0	0	0	0	0	0	0	0	1560000
1015509599	140000	980000	460000	0	0	0	0	0	0	0	0	0	0	0	0	0	0	0	0	0	980000	0	0	0	0	0	0	0	0	0	0	0	0	0	0	0	0	0
1028579422	0	560000	900000	1240000	1260000	120000	400000	0	220000	1200000	1520000	1680000	1860000	2360000	0	1720000	1540000	940000	1060000	0	820000	2020000	2260000	0	0	0	0	0	0	2380000	1040000	1440000	1300000	1640000	2240000	820000	2740000	1640000
2402453	140000	700000	700000	1140000	0	1000000	0	0	780000	600000	740000	860000	960000	1160000	0	760000	0	0	0	740000	760000	1020000	60000	0	0	0	620000	1220000	1040000	680000	540000	400000	660000	1020000	1100000	440000	660000	800000
1022582457	180000	860000	1000000	1800000	40000	0	0	0	1260000	980000	1160000	0	0	1800000	0	1220000	80000	0	0	0	860000	0	0	0	0	0	0	0	0	0	0	0	0	0	620000	0	0	1360000
3104499	240000	780000	820000	1200000	0	0	0	0	640000	0	0	0	0	20000	0	640000	0	0	0	0	1640000	0	0	0	0	0	0	0	0	0	0	0	0	0	0	0	0	0
12219414	0	1540000	1380000	20000	0	0	0	0	0	0	0	0	0	0	0	0	0	0	0	0	720000	0	0	0	0	0	0	0	80000	0	0	0	0	0	0	0	0	0
1025911133	160000	1360000	640000	0	0	0	0	0	0	0	0	0	0	0	0	0	0	0	0	0	1360000	0	0	0	0	0	0	0	0	0	0	740000	0	0	0	0	0	0
1021871901	220000	920000	920000	1200000	840000	1300000	0	0	1020000	780000	980000	1160000	1260000	1560000	0	1000000	1000000	0	0	0	960000	1340000	0	0	0	0	0	0	0	880000	0	0	360000	0	1380000	0	860000	1060000
1027729525	240000	1280000	1280000	1560000	340000	1980000	280000	540000	1080000	1060000	1560000	1540000	1760000	2120000	0	1240000	0	140000	200000	420000	1320000	2240000	1140000	0	0	0	0	40000	900000	1180000	800000	1160000	1080000	780000	1780000	700000	1260000	1480000
1028836110	260000	1360000	1400000	2240000	680000	1940000	300000	1380000	1780000	1160000	1500000	1680000	1960000	2260000	0	1580000	940000	1020000	1040000	2240000	1520000	1960000	1180000	0	0	0	380000	2340000	2040000	1240000	1000000	1380000	1240000	2000000	2180000	840000	1300000	1620000
1028103063	160000	1000000	1140000	540000	0	0	0	0	0	0	0	0	0	0	0	0	0	0	0	0	1040000	0	0	0	0	0	0	0	0	0	0	0	0	0	0	0	0	0
1026220168	0	1100000	1140000	2380000	1320000	2060000	0	0	1640000	1260000	1040000	1660000	2000000	1700000	0	1440000	2760000	0	0	0	1200000	2180000	0	0	0	0	0	0	0	0	0	1660000	0	0	2300000	0	40000	1320000
1026265789	280000	2340000	2740000	3640000	2120000	1900000	780000	1260000	1520000	2920000	1480000	20000	0	2660000	2080000	1520000	1500000	960000	1040000	2200000	3240000	1320000	1160000	2100000	40000	2680000	0	160000	2080000	1760000	1140000	1400000	1500000	1620000	2400000	840000	1500000	1580000
1014087047	260000	1000000	1120000	2280000	1220000	1220000	460000	1320000	0	0	1520000	1040000	1600000	2600000	1860000	1560000	2040000	600000	580000	1640000	1560000	1520000	720000	1280000	1240000	1640000	1280000	1640000	1400000	900000	620000	2120000	780000	1660000	0	480000	1140000	0
3252464	260000	1100000	860000	0	0	0	0	0	0	0	0	0	0	0	0	0	0	0	0	0	920000	0	0	0	0	0	0	0	0	0	0	0	0	0	0	0	0	0
1030441777	100000	1120000	1240000	1880000	0	0	0	0	0	0	0	0	0	0	0	1180000	0	0	0	0	760000	20000	0	0	0	0	0	0	0	0	0	0	0	0	0	0	0	0
1017454480	200000	20000	20000	20000	0	0	0	0	60000	0	0	60000	0	0	0	480000	0	0	0	0	40000	0	0	0	0	0	0	0	20000	0	0	0	0	0	0	0	0	0
1031891951	120000	40000	60000	740000	800000	880000	520000	1660000	0	840000	1060000	960000	1000000	1540000	0	0	920000	740000	700000	1420000	120000	1320000	780000	0	0	0	0	540000	1540000	840000	700000	920000	840000	1680000	1360000	580000	840000	1060000
1029620826	0	1420000	1360000	2320000	0	0	0	0	0	0	0	0	0	0	0	140000	0	0	0	0	2020000	0	0	0	0	0	0	0	0	0	0	0	0	0	0	0	0	0
1024871586	240000	1580000	1620000	160000	0	0	0	0	0	0	0	0	0	0	0	0	0	0	0	0	1640000	0	0	0	0	0	0	0	0	0	0	0	0	0	0	0	0	0
1030081803	0	580000	400000	1480000	0	0	0	0	0	0	0	0	0	0	0	180000	0	0	0	0	980000	0	0	0	0	0	0	0	0	0	0	0	0	0	0	0	0	0
1018840642	0	1380000	1380000	2240000	1020000	2120000	0	0	1520000	1200000	1560000	1700000	1880000	2280000	0	1560000	1480000	0	0	0	1520000	2380000	280000	0	0	0	0	0	0	1740000	1140000	1360000	1500000	2060000	2200000	1040000	1400000	1740000
2485001	180000	860000	740000	1320000	740000	900000	460000	780000	820000	680000	840000	980000	1120000	1300000	700000	960000	860000	580000	600000	1340000	900000	1240000	720000	1060000	1020000	940000	1240000	1560000	1320000	760000	620000	820000	760000	1160000	1260000	500000	760000	900000
6832656	200000	1440000	1480000	20000	0	0	0	0	0	0	0	0	0	0	0	0	0	0	0	0	1620000	0	0	0	0	0	0	0	0	0	0	0	0	0	0	0	0	0
1029417721	0	1240000	1220000	2060000	0	0	0	0	680000	0	0	0	0	0	0	1260000	0	0	0	0	1500000	0	0	0	0	0	0	0	0	0	0	0	0	0	0	0	0	0
1026655647	260000	1440000	1380000	340000	0	0	0	0	1560000	0	1480000	0	0	2240000	0	1460000	0	0	0	0	1540000	0	0	0	0	0	0	0	0	0	0	0	0	0	0	0	0	320000
1030263551	20000	1320000	1240000	580000	0	0	0	0	40000	0	1440000	0	0	4440000	0	180000	0	0	0	0	1740000	0	0	0	0	0	0	0	0	0	0	0	0	0	0	0	0	1400000
8041586	0	800000	200000	0	0	0	0	0	0	0	840000	0	0	1300000	0	0	0	0	0	0	840000	0	0	0	0	0	0	0	0	0	0	0	0	0	0	0	0	640000
1019315277	20000	1500000	1100000	1400000	0	0	0	0	280000	0	0	0	0	1440000	0	720000	0	0	0	0	120000	0	0	0	0	0	0	0	0	0	0	0	0	0	0	0	0	0
1030264970	120000	800000	300000	0	0	0	0	0	0	0	0	0	0	0	0	0	0	0	0	0	1360000	0	0	0	0	0	0	0	0	0	0	0	0	0	0	0	0	0
1029408859	100000	1480000	1380000	20000	0	0	0	0	1180000	1060000	1260000	0	0	2180000	0	1240000	0	0	0	0	1200000	0	0	0	0	0	0	0	0	0	0	0	0	0	360000	0	0	400000
1022724903	20000	40000	440000	0	0	2040000	780000	1200000	1100000	420000	0	1680000	1900000	20000	0	880000	0	980000	1040000	20000	740000	1960000	1180000	0	0	0	0	0	0	1300000	1060000	20000	1280000	2060000	1520000	840000	1280000	80000
1031549865	320000	1440000	1380000	2220000	460000	60000	0	1200000	1920000	1160000	1440000	1860000	20000	2260000	0	1400000	1480000	0	0	1000000	1620000	1940000	540000	0	0	0	0	680000	2180000	1360000	1100000	1340000	1340000	2200000	2180000	1020000	120000	900000
1028859276	360000	800000	800000	20000	0	0	0	0	0	60000	0	0	0	0	0	0	0	0	0	0	860000	0	0	0	0	0	0	0	0	0	0	0	0	0	0	0	0	0
10903157	200000	1300000	1320000	160000	0	0	0	0	1180000	0	1500000	0	0	2000000	0	1240000	0	0	0	0	40000	0	0	0	0	0	0	0	0	0	0	0	0	0	0	0	0	1240000
1026954829	60000	1380000	1400000	2340000	1340000	2080000	100000	1300000	140000	1400000	1280000	1720000	3080000	1760000	980000	1580000	1640000	380000	1020000	2580000	1340000	2060000	1340000	1320000	1660000	400000	2040000	2340000	2120000	1400000	1100000	1520000	1340000	2100000	2400000	860000	1400000	1940000
1030561879	280000	1440000	380000	0	0	0	0	0	0	0	0	0	0	0	0	0	0	0	0	0	1640000	0	0	0	0	0	0	0	0	0	0	0	0	0	0	0	0	0
1019992728	200000	1340000	1400000	2240000	1220000	1960000	0	0	1560000	820000	860000	520000	1860000	2400000	0	1460000	1540000	0	0	0	1180000	1980000	0	0	0	0	0	0	0	0	0	1400000	0	0	2040000	0	2800000	1440000
1029506803	200000	1320000	140000	0	0	0	0	0	0	0	0	0	0	0	0	0	0	0	0	0	1400000	0	0	0	0	0	0	0	0	0	0	0	0	0	0	0	0	0
7563922	280000	380000	800000	1260000	0	0	0	0	1300000	0	0	0	0	160000	0	880000	0	0	0	0	1680000	0	0	0	0	0	0	0	0	0	0	0	0	0	0	0	0	0
7753668	20000	40000	40000	0	0	0	0	0	0	0	0	0	0	0	0	0	0	0	0	0	40000	0	0	0	0	0	0	0	0	0	0	0	0	0	0	0	0	0
1029504643	180000	1280000	1100000	1740000	900000	2780000	520000	820000	1140000	640000	740000	1140000	1300000	1560000	0	1080000	1640000	660000	660000	1420000	1680000	1460000	320000	1700000	1320000	1900000	1480000	2140000	140000	1220000	720000	1060000	880000	1360000	1500000	560000	1040000	780000
1028448830	260000	2260000	1100000	1500000	0	0	0	0	1020000	0	0	0	0	0	0	1000000	0	0	0	0	2600000	0	0	0	0	0	0	0	0	0	0	0	0	0	0	0	0	0
1020708019	200000	1440000	620000	1980000	0	0	0	0	20000	0	0	0	0	0	0	1760000	0	0	0	0	1620000	0	0	0	0	0	0	0	0	0	0	0	0	0	0	0	0	0
1028207130	240000	1320000	1460000	40000	0	0	0	0	0	0	0	0	0	0	0	0	0	0	0	0	1340000	0	0	0	0	0	0	0	0	0	0	0	0	0	0	0	0	0
1028531990	260000	1360000	1360000	2300000	0	0	0	0	1520000	0	0	0	0	0	0	1500000	0	0	0	0	1500000	0	0	0	0	0	0	0	0	0	0	0	0	0	0	0	0	0
1029338634	140000	700000	700000	1140000	0	980000	0	0	780000	0	600000	860000	920000	1040000	0	760000	0	0	160000	40000	740000	1000000	600000	0	880000	0	940000	1200000	1040000	660000	540000	0	660000	1020000	0	440000	660000	640000
8437603	100000	1020000	1080000	1660000	220000	0	0	0	1140000	840000	1000000	0	0	1660000	0	1020000	0	0	0	0	1200000	0	0	0	0	0	0	0	0	0	0	960000	0	0	1600000	0	0	1080000
1029359354	0	1180000	580000	1860000	0	0	0	0	2180000	0	0	0	0	0	0	1500000	0	0	0	0	1360000	0	0	0	0	0	0	0	0	0	0	0	0	0	0	0	0	0
1023224195	220000	2460000	1160000	1820000	1040000	0	0	0	1260000	0	1100000	0	0	1340000	0	1180000	1300000	0	0	0	4480000	0	0	0	0	0	0	0	0	0	0	1120000	0	0	480000	0	0	1180000
1027228100	180000	1120000	20000	0	0	0	0	0	0	0	0	0	0	0	0	0	0	0	0	0	1360000	0	0	0	0	0	0	0	0	0	0	0	0	0	0	0	0	0
1026287843	0	1060000	1060000	780000	0	0	0	0	0	0	0	0	0	0	0	0	0	0	0	0	660000	0	0	0	0	0	0	0	0	0	0	0	0	0	0	0	0	0
1021567793	160000	200000	1280000	320000	0	0	0	0	20000	0	0	0	0	60000	0	0	0	0	0	0	960000	0	0	0	0	0	0	0	0	0	0	0	0	0	0	0	0	0
6887611	260000	2640000	1380000	2260000	0	0	0	0	0	0	0	0	0	0	0	4000000	0	0	0	0	3020000	0	0	0	0	0	0	0	0	0	0	0	0	0	0	0	0	0
1030427468	100000	1340000	1720000	100000	0	0	0	0	0	0	0	0	0	100000	0	0	0	0	0	0	1540000	0	0	0	0	0	0	0	0	0	0	0	0	0	0	0	0	0
1015800761	20000	1560000	1440000	2080000	0	0	0	0	0	0	0	0	0	0	0	0	0	0	0	0	1760000	0	0	0	0	0	0	0	0	0	0	0	0	0	0	0	0	0
11614192	120000	1400000	360000	0	0	0	0	0	0	1200000	0	0	0	0	0	0	0	0	0	0	1260000	0	0	0	0	0	0	0	0	0	0	0	0	0	2160000	0	0	0
1027668456	220000	1180000	1100000	1840000	840000	1360000	880000	860000	1400000	780000	1000000	1380000	1980000	1620000	1280000	1220000	1340000	660000	700000	1360000	1280000	1340000	780000	1400000	1120000	1740000	1200000	1560000	1320000	920000	1640000	960000	860000	1960000	1700000	640000	1060000	1240000
1030280928	180000	540000	580000	1040000	0	0	0	0	0	0	0	0	0	0	0	0	0	0	0	0	720000	0	0	0	0	0	0	0	0	0	0	0	0	0	0	0	0	0
1022165013	120000	1080000	1140000	1900000	0	0	0	0	0	0	0	0	0	0	0	120000	0	0	0	0	1340000	0	0	0	0	0	0	0	0	0	0	0	0	0	0	0	0	0
1028517069	260000	1600000	1400000	2280000	0	0	0	0	920000	0	0	0	0	0	0	1020000	0	0	0	0	1700000	0	0	0	0	0	0	0	0	0	0	0	0	0	0	0	0	0
1162328	0	0	480000	2260000	0	0	0	0	0	0	0	0	0	0	0	680000	0	0	0	0	20000	0	0	0	0	0	0	0	0	0	0	0	0	0	0	0	0	0
1030446128	100000	1380000	1200000	1800000	1040000	0	0	0	1720000	1060000	1400000	0	0	1980000	0	1300000	0	0	0	0	1020000	0	0	0	0	0	0	0	0	0	0	1140000	0	0	1800000	0	0	1460000
1029995154	140000	820000	900000	0	0	0	0	0	0	0	0	0	0	0	0	0	0	0	0	0	1240000	0	0	0	0	0	0	0	0	0	0	0	0	0	0	0	0	0
12635220	220000	1440000	1500000	2260000	0	0	0	0	0	0	0	0	0	700000	0	0	0	0	0	0	1500000	0	0	0	0	0	0	0	0	0	0	0	0	0	0	0	0	0
1028880169	140000	1460000	1560000	2300000	0	0	0	0	1540000	0	0	0	0	0	0	1500000	0	0	0	0	1620000	0	0	0	0	0	0	0	0	0	0	0	0	0	0	0	0	0
1018610091	0	0	140000	0	0	0	0	0	0	0	0	0	0	0	0	0	0	0	0	0	100000	0	0	0	0	0	0	0	0	0	0	0	0	0	0	0	0	0
1020146054	300000	1100000	1100000	1800000	1220000	0	0	0	1620000	1180000	1560000	1660000	1880000	2580000	0	1460000	1480000	0	20000	0	1180000	1960000	1160000	0	0	0	0	0	0	1300000	1100000	1440000	1260000	2040000	2180000	860000	1280000	2620000
6793745	0	1040000	860000	1400000	0	0	0	0	1060000	20000	900000	0	0	1140000	0	1020000	0	0	0	0	1160000	0	0	0	0	0	0	0	0	0	0	0	0	0	0	0	0	1100000
1021539806	280000	1400000	1340000	0	0	0	0	0	0	0	0	0	0	0	0	0	0	0	0	0	1520000	0	0	0	0	0	0	0	0	0	0	0	0	0	0	0	0	0
1030677304	140000	1980000	1620000	2300000	0	280000	660000	1060000	1560000	0	1480000	820000	0	2320000	0	1460000	0	780000	1000000	560000	1340000	0	1220000	1680000	20000	560000	0	800000	1700000	1360000	1080000	0	1320000	2040000	0	820000	1280000	1540000
1024338169	300000	1540000	1600000	2480000	0	0	0	0	1660000	20000	0	0	0	240000	0	1860000	0	0	0	0	1700000	0	0	0	0	0	0	0	0	0	0	0	0	0	0	0	0	0
5394127	320000	1480000	1400000	2240000	840000	0	780000	820000	1500000	1160000	1440000	1680000	860000	2260000	380000	1480000	0	980000	1040000	2220000	1500000	2160000	1160000	3600000	1580000	3840000	2720000	3160000	3340000	1300000	1060000	1400000	1280000	2020000	2160000	840000	1280000	1980000
1032812606	260000	940000	900000	880000	0	0	0	0	0	0	540000	0	0	0	0	0	0	0	0	0	1040000	0	0	0	0	0	0	0	0	0	0	0	0	0	0	0	0	0
1031027838	0	1860000	260000	0	0	0	0	0	0	0	0	0	0	0	0	0	0	0	0	0	1420000	0	0	0	0	0	0	0	0	0	0	0	0	0	0	0	0	0
1029749557	0	860000	1280000	1460000	0	0	0	0	40000	0	0	0	0	0	0	1700000	0	0	0	0	1560000	0	0	0	0	0	0	0	0	0	0	0	0	0	0	0	0	0
1029685570	260000	1020000	540000	1480000	0	0	0	0	840000	900000	740000	0	0	1240000	0	760000	0	0	0	0	1120000	0	0	0	0	0	0	0	0	0	0	0	0	0	0	0	0	800000
1031493673	100000	920000	900000	700000	0	0	0	0	0	0	0	0	0	0	0	0	0	0	0	0	1020000	0	0	0	0	0	0	0	0	0	0	0	0	0	0	0	0	0
1029746473	200000	1400000	340000	0	0	0	0	0	0	0	0	0	0	0	0	0	0	0	0	0	960000	0	0	0	0	0	0	0	0	0	0	0	0	0	0	0	0	0
1032117923	20000	660000	780000	280000	0	0	0	0	0	0	0	0	0	0	0	200000	0	0	0	0	440000	0	0	0	0	0	0	0	0	0	0	0	0	0	0	0	0	0
1014876714	280000	1500000	1380000	20000	1300000	2200000	640000	880000	1520000	1180000	660000	1740000	2540000	1380000	2060000	1460000	1480000	640000	340000	740000	1760000	2060000	620000	2000000	1820000	2380000	1820000	2100000	1920000	1320000	1060000	1440000	1360000	2560000	2220000	860000	1040000	1100000
1032129281	260000	1360000	1460000	2280000	0	0	0	0	1520000	0	1440000	0	0	2240000	0	1520000	0	0	0	0	1500000	0	0	0	0	0	0	0	0	0	0	0	0	0	0	0	0	1540000
6742697	240000	1360000	1380000	2260000	0	0	0	0	1540000	1180000	1100000	420000	0	1920000	0	1580000	0	0	0	0	1560000	1980000	0	0	0	0	0	0	0	0	0	1440000	0	0	2140000	0	0	140000
3088585	0	1360000	40000	0	0	0	0	0	0	0	0	0	0	0	0	0	0	0	0	0	940000	0	0	0	0	0	0	0	0	0	0	0	0	0	0	0	0	0
508394	0	1640000	1220000	160000	0	0	0	0	0	0	0	0	0	0	0	0	0	0	0	0	2320000	0	0	0	0	0	0	0	0	0	0	0	0	0	0	0	0	0
1029923049	260000	1440000	60000	0	0	0	0	0	0	0	0	0	0	0	0	0	0	0	0	0	1500000	0	0	0	0	0	0	0	0	0	0	0	0	0	0	0	0	0
1019500179	180000	1020000	940000	1560000	0	0	540000	960000	0	0	0	0	0	0	1520000	400000	0	840000	740000	1540000	1200000	0	1120000	0	0	2660000	920000	2300000	1360000	0	0	0	0	1060000	0	0	0	0
1027813241	0	1560000	1240000	280000	0	0	0	0	0	0	0	0	0	0	0	0	0	0	0	0	260000	0	0	0	0	0	0	0	0	0	0	0	0	0	0	0	0	0
1019524485	0	1260000	1120000	1820000	0	0	0	0	0	0	0	0	0	0	0	1040000	0	0	0	0	1120000	0	0	0	0	0	0	0	0	0	0	0	0	0	0	0	0	0
11367911	0	1620000	1400000	2320000	0	0	0	0	1560000	1180000	880000	0	0	2500000	0	1480000	0	0	0	0	1480000	0	0	0	0	0	0	0	0	0	0	940000	0	0	2200000	0	0	1200000
1019524812	220000	2300000	1240000	2180000	1060000	0	0	0	1220000	920000	2400000	0	0	3640000	0	1480000	0	0	0	0	2440000	0	0	0	0	0	0	0	0	0	0	1140000	0	0	1800000	0	0	1860000
1028855143	0	2040000	1380000	1700000	800000	0	0	0	1960000	1180000	1500000	0	0	2640000	0	1520000	0	0	0	0	1380000	0	0	0	0	0	0	0	0	0	0	1360000	0	0	1980000	0	0	380000
3354114	360000	1360000	1420000	2100000	0	0	0	0	0	0	0	0	0	0	0	0	0	0	0	0	1700000	0	0	0	0	0	0	0	0	0	0	0	0	0	0	0	0	0
1026846792	180000	940000	880000	900000	0	0	0	0	0	0	0	0	0	0	0	0	0	0	0	0	760000	0	0	0	0	0	0	0	0	0	0	0	0	0	0	0	0	0
1032272521	100000	1800000	320000	0	0	0	0	0	0	0	0	0	0	40000	0	0	0	0	0	0	1700000	0	0	0	0	0	0	0	0	0	0	0	0	0	0	0	0	0
1014819663	0	1260000	1040000	1620000	1360000	0	0	0	0	1200000	1460000	0	0	2280000	0	1060000	1800000	0	0	0	980000	40000	0	0	0	0	0	0	0	0	0	1420000	0	0	2760000	0	0	1580000
1029690433	240000	1040000	1020000	1860000	0	0	0	0	1240000	0	0	0	0	20000	0	1440000	0	0	0	0	1460000	0	0	0	0	0	0	0	0	0	0	0	0	0	0	0	0	0
1018032354	0	0	1760000	2280000	0	0	0	0	1840000	0	1440000	0	0	2280000	0	1520000	0	0	0	0	0	0	0	0	0	0	0	0	0	0	0	0	0	0	0	0	0	3240000
1030092406	0	1140000	720000	1540000	0	0	0	0	0	0	0	0	0	0	0	420000	0	0	0	0	1260000	0	0	0	0	0	0	0	0	0	0	0	0	0	0	0	0	0
1020114572	0	840000	720000	80000	960000	1460000	560000	820000	1580000	700000	1020000	1140000	1440000	1960000	1420000	340000	1300000	660000	700000	1520000	2420000	1420000	820000	1500000	1360000	1620000	40000	1600000	1380000	860000	740000	1020000	860000	1400000	1540000	640000	900000	1100000
1020366391	140000	1120000	1140000	1800000	980000	1220000	0	0	1460000	940000	1140000	1320000	1480000	2140000	0	1460000	1040000	0	0	0	2420000	1760000	0	0	0	0	0	0	0	0	0	1220000	0	0	1500000	0	0	1420000
1014765276	0	1120000	1060000	160000	140000	0	0	0	20000	820000	1120000	0	0	40000	0	0	0	0	0	0	4320000	0	0	0	0	0	0	0	0	0	0	1320000	0	0	1860000	0	0	800000
1023390373	300000	800000	600000	1260000	0	0	0	0	1420000	0	0	0	0	60000	0	1080000	0	0	0	0	1200000	0	0	0	0	0	0	0	0	0	0	0	0	0	0	0	0	0
1032889925	240000	1460000	1400000	0	0	0	0	0	0	0	0	0	0	0	0	0	0	0	0	0	1500000	0	0	0	0	0	0	0	0	0	0	0	0	0	0	0	0	0
1028994976	140000	1780000	1560000	2260000	980000	0	0	0	2040000	1380000	1080000	0	0	1420000	0	1700000	540000	0	0	0	1580000	0	0	0	0	0	0	0	0	0	0	860000	0	0	2500000	0	0	0
1029639223	0	0	60000	20000	640000	280000	0	0	0	580000	0	860000	960000	1000000	0	0	760000	0	0	0	60000	1040000	0	0	0	0	0	0	0	0	0	720000	0	0	1120000	0	0	160000
1014234497	80000	100000	60000	80000	0	0	0	0	0	0	0	0	0	0	0	20000	0	0	0	0	120000	0	0	0	0	0	0	0	0	0	0	0	0	0	0	0	0	0
1017220617	220000	1220000	1380000	0	0	0	0	0	0	0	0	0	0	0	0	0	0	0	0	0	1280000	0	0	0	0	0	0	0	0	0	0	0	0	0	0	0	0	0
1025490875	0	1640000	1780000	2380000	0	0	0	0	440000	0	1740000	0	0	2540000	0	2580000	0	0	0	0	660000	0	0	0	0	0	0	0	0	0	0	0	0	0	0	0	0	160000
1016369634	0	1360000	1380000	2260000	0	0	80000	360000	1520000	0	1440000	0	0	2240000	500000	1480000	0	80000	160000	1260000	1340000	0	100000	2060000	0	2420000	0	1660000	1020000	0	0	0	0	0	0	0	0	220000
1029117387	260000	1340000	1420000	2240000	1600000	1300000	0	0	1700000	1160000	1100000	1700000	0	2880000	0	1500000	1680000	0	0	0	1940000	2140000	0	0	0	0	0	0	0	0	0	1660000	0	0	2220000	0	0	1540000
1020531645	260000	1420000	1420000	2280000	1240000	1940000	780000	1200000	1520000	1160000	1460000	1680000	1880000	2260000	0	1680000	1520000	1000000	1040000	2260000	1500000	1980000	1160000	0	0	0	0	0	0	1260000	1060000	1400000	1260000	2040000	2200000	860000	1320000	1620000
1020190550	260000	1360000	1380000	1820000	0	0	0	0	1260000	1160000	1440000	0	0	2240000	0	0	0	0	0	0	1500000	0	0	0	0	0	0	0	0	0	0	0	0	0	1620000	0	0	1560000
1023429697	160000	1520000	1320000	1800000	700000	0	0	0	20000	1120000	1340000	1360000	3100000	1940000	0	160000	1440000	0	0	0	1220000	1860000	0	0	0	0	0	0	0	0	0	920000	0	0	1820000	0	0	1360000
1029918036	20000	1240000	1400000	1440000	0	0	0	0	900000	0	840000	0	0	1380000	0	980000	0	0	0	0	40000	0	0	0	0	0	0	0	0	0	0	0	0	0	0	0	0	4200000
1028344359	180000	120000	540000	820000	0	0	0	0	940000	0	0	0	0	380000	0	220000	0	0	0	0	140000	0	0	0	0	0	0	0	0	0	0	0	0	0	0	0	0	0
1030201602	0	40000	140000	100000	1080000	0	0	0	720000	1180000	1400000	0	0	2200000	0	1360000	1540000	0	0	0	60000	0	0	0	0	0	0	0	0	0	0	1520000	0	0	2020000	0	0	1840000
1029867048	260000	1480000	300000	40000	260000	0	0	0	0	1180000	1540000	0	0	2300000	0	0	0	0	0	0	1900000	0	0	0	0	0	0	0	0	0	0	100000	0	0	1580000	0	0	660000
1032375514	260000	1360000	1360000	2160000	0	0	0	0	0	0	0	0	0	0	0	20000	0	0	0	0	1420000	0	0	0	0	0	0	0	0	0	0	0	0	0	0	0	0	0
1027159307	80000	380000	740000	40000	0	0	0	0	0	0	0	0	0	140000	0	20000	0	0	0	0	780000	0	0	0	0	0	0	0	0	0	0	0	0	0	0	0	0	0
3929394	260000	1380000	1420000	2240000	1220000	0	0	0	1520000	1220000	1440000	0	0	2240000	0	1500000	1460000	0	0	0	1500000	0	0	0	0	0	0	0	0	0	0	1980000	0	0	2160000	0	0	2140000
1029492572	300000	1540000	1220000	2060000	1700000	1800000	820000	1220000	140000	1200000	1560000	1660000	1840000	2300000	0	680000	680000	1080000	1040000	760000	1760000	1900000	1180000	0	0	0	100000	2000000	1520000	1300000	900000	1580000	1180000	2060000	2500000	920000	1820000	1680000
1030654453	0	920000	1240000	2020000	700000	0	0	0	0	820000	800000	0	0	1720000	0	120000	440000	0	0	0	0	20000	0	0	0	0	0	0	0	0	0	1520000	0	0	1640000	0	0	1240000
5000253	280000	1340000	600000	0	0	0	0	0	0	1140000	0	0	0	0	0	0	0	0	0	0	1440000	0	0	0	0	0	0	0	0	0	0	0	0	0	320000	0	0	0
1032191312	0	880000	1400000	0	0	0	0	0	0	0	0	0	0	0	0	0	0	0	0	0	0	0	0	0	0	0	0	0	0	0	0	0	0	0	0	0	0	0
1029488726	260000	1360000	1400000	2600000	1240000	1960000	0	0	1520000	1140000	1640000	1700000	1980000	2320000	0	1480000	1480000	0	0	0	1440000	1980000	0	0	0	0	0	0	0	800000	0	1860000	100000	0	2520000	0	860000	1840000
7183611	260000	1360000	1380000	40000	0	0	0	0	0	0	0	0	0	0	0	0	0	0	0	0	1520000	0	0	0	0	0	0	0	0	0	0	0	0	0	0	0	0	0
1031554819	0	1320000	1380000	2220000	1280000	0	0	0	1500000	1220000	1440000	0	0	1800000	0	1500000	1440000	0	0	0	1900000	1440000	0	0	0	0	0	0	0	0	0	1400000	0	0	2180000	0	0	1600000
1028824417	220000	1600000	1520000	0	0	0	0	0	0	0	0	0	0	0	0	0	0	0	0	0	1800000	0	0	0	0	0	0	0	0	0	0	0	0	0	0	0	0	0
1032979853	260000	1280000	1480000	400000	0	0	0	0	0	0	0	0	0	0	0	0	0	0	0	0	1640000	0	0	0	0	0	0	0	0	0	0	0	0	0	0	0	0	0
10864026	180000	1460000	1500000	2380000	1260000	1920000	840000	1300000	1520000	1240000	0	1840000	1920000	620000	1720000	2000000	1700000	1040000	1100000	2320000	1340000	2080000	1340000	1580000	1900000	1760000	2020000	2500000	2180000	1420000	1060000	1420000	1360000	2760000	2400000	1000000	1520000	240000
1029618943	60000	1360000	1400000	2280000	0	0	0	0	0	0	0	0	0	0	0	0	0	0	0	0	1640000	0	0	0	0	0	0	0	0	0	0	0	0	0	0	0	0	0
1031245322	20000	20000	20000	40000	40000	20000	0	0	40000	40000	40000	20000	20000	40000	40000	40000	20000	0	0	0	80000	20000	0	40000	40000	20000	20000	0	40000	20000	0	20000	0	0	20000	0	20000	0
1030238202	0	1560000	1360000	1740000	0	0	0	0	0	0	0	0	0	0	0	0	0	0	0	0	1380000	0	0	0	0	0	0	0	0	0	0	0	0	0	0	0	0	0
1023923333	240000	1380000	1460000	1980000	0	0	0	0	1480000	0	0	0	0	20000	20000	1500000	0	0	0	0	1520000	0	0	1660000	300000	1600000	1800000	1840000	200000	0	540000	0	1320000	0	20000	840000	0	0
1020902719	0	1380000	20000	0	0	0	0	0	0	0	0	0	0	0	0	0	0	0	0	0	1300000	0	0	0	0	0	0	0	0	0	0	0	0	0	0	0	0	0
1017123288	360000	1360000	1480000	760000	0	0	0	0	0	0	0	0	0	0	0	0	0	0	0	0	1640000	0	0	0	0	0	0	0	0	0	0	0	0	0	0	0	0	0
2568123	0	0	140000	0	0	0	0	0	0	0	0	0	0	0	0	0	0	0	0	0	20000	0	0	0	0	0	0	0	0	0	0	0	0	0	0	0	0	0
1020641256	260000	1620000	1460000	0	0	0	0	0	0	0	0	0	0	0	0	0	0	0	0	0	1540000	0	0	0	0	0	0	0	0	0	0	0	0	0	0	0	0	0
10803988	240000	1500000	1240000	2420000	1240000	1620000	1040000	1280000	2040000	1160000	1700000	1760000	1560000	2680000	0	1520000	1600000	1460000	1020000	60000	1120000	2040000	1680000	0	0	0	0	0	0	1200000	960000	1440000	1060000	1740000	1940000	740000	1200000	2160000
1017724108	0	700000	900000	1220000	0	0	0	0	1180000	0	0	0	0	1260000	0	540000	0	0	0	0	820000	0	0	0	0	0	0	0	0	0	0	0	0	0	0	0	0	0
1020238858	0	1300000	1280000	2260000	0	0	0	0	0	0	0	0	0	0	0	240000	0	0	0	0	980000	0	0	0	0	0	0	0	0	0	0	0	0	0	0	0	0	0
1026786054	0	1380000	1320000	1860000	0	0	0	0	1540000	0	0	0	0	20000	0	1940000	0	0	0	0	1280000	0	0	0	0	0	0	0	0	0	0	0	0	0	0	0	0	0
1030016464	100000	820000	20000	0	0	0	0	0	0	0	0	0	0	160000	0	0	0	0	0	0	1580000	0	0	0	0	0	0	0	0	0	0	0	0	0	0	0	0	0
8211098	0	1260000	1180000	1960000	1300000	40000	0	0	1980000	1240000	1560000	1840000	1900000	2480000	0	1680000	1600000	0	0	0	1940000	2080000	0	0	0	0	0	0	0	0	0	1460000	0	0	2200000	0	0	2240000
9791924	260000	1440000	1380000	1780000	120000	20000	0	0	100000	40000	40000	40000	40000	1380000	0	20000	40000	0	0	0	1500000	1180000	20000	60000	0	0	0	0	20000	40000	340000	240000	20000	40000	40000	80000	20000	40000
1019037806	40000	1020000	1300000	200000	0	0	0	0	0	0	0	0	0	0	0	0	0	0	0	0	0	0	0	0	0	0	0	0	0	0	0	0	0	0	0	0	0	0
1029151257	240000	1320000	1380000	2240000	0	0	0	0	20000	0	0	0	0	0	0	1480000	0	0	0	0	1500000	0	0	0	0	0	0	0	0	0	0	0	0	0	0	0	0	0
1023970160	0	1700000	960000	0	1260000	0	0	0	0	0	0	60000	0	0	0	0	1580000	0	0	0	0	540000	0	0	0	0	0	0	0	0	0	0	0	0	0	0	0	0
1027220276	240000	1520000	1380000	80000	0	0	0	0	0	0	0	0	0	0	0	40000	0	0	0	0	1520000	0	0	0	0	0	0	0	0	0	0	0	0	0	0	0	0	0
1015542984	0	0	740000	2280000	0	0	0	0	340000	0	0	0	0	0	0	1560000	0	0	0	0	40000	0	0	0	0	0	0	0	0	0	0	0	0	0	0	0	0	0
10981965	0	1240000	1260000	580000	0	0	0	0	0	0	0	0	0	0	0	0	0	0	0	0	1460000	0	0	0	0	0	0	0	0	0	0	0	0	0	0	0	0	0
1028631239	0	1420000	1460000	2280000	0	0	0	0	500000	0	0	0	0	0	0	1520000	0	0	0	0	120000	0	0	0	0	0	0	0	0	0	0	0	0	0	0	0	0	0
7289544	220000	980000	40000	1620000	0	0	0	0	1100000	780000	960000	0	0	1560000	0	1120000	0	0	0	0	1100000	0	0	0	0	0	0	0	0	0	0	0	0	0	440000	0	0	1080000
1017545116	0	1020000	1480000	2220000	0	0	0	0	2080000	0	0	0	0	80000	0	1620000	0	0	0	0	1400000	0	0	0	0	0	0	0	0	0	0	0	0	0	0	0	0	0
1029105405	200000	940000	1220000	1920000	0	0	0	0	940000	0	780000	0	0	3000000	0	1320000	0	0	0	0	1080000	0	0	0	0	0	0	0	0	0	0	0	0	0	0	0	0	1700000
1027921919	0	1160000	1160000	2520000	1020000	1120000	780000	1240000	1220000	960000	1240000	1400000	1520000	1780000	0	1280000	1380000	980000	1040000	2220000	1040000	1780000	1240000	0	0	0	0	0	20000	1280000	1060000	1660000	1240000	1820000	2440000	840000	1260000	1400000
1027749551	40000	1020000	1120000	1660000	0	0	0	0	580000	0	1140000	0	0	1900000	0	760000	0	0	0	0	1340000	0	0	0	0	0	0	0	0	0	0	0	0	0	0	0	0	180000
1022285229	260000	1440000	1380000	2040000	0	0	0	0	1420000	0	0	0	0	180000	0	1480000	0	0	0	0	1640000	0	0	0	0	0	0	0	0	0	0	0	0	0	0	0	0	0
7361796	260000	1680000	1440000	2340000	1260000	0	0	0	1560000	1160000	1400000	0	0	2300000	0	1480000	1480000	0	0	0	1520000	40000	0	0	0	0	0	0	0	0	0	1420000	0	0	2200000	0	0	1540000
1027749221	260000	1620000	460000	0	0	0	0	0	0	0	0	0	0	0	0	0	0	0	0	0	1440000	0	0	0	0	0	0	0	0	0	0	0	0	0	0	0	0	0
9750020	180000	1320000	1320000	1800000	0	0	0	0	1500000	0	0	0	0	500000	0	1160000	0	0	0	0	1540000	0	0	0	0	0	0	0	0	0	0	0	0	0	0	0	0	0
5524029	200000	1120000	1060000	1720000	880000	1000000	0	0	1360000	860000	1160000	1260000	1560000	1740000	0	1380000	1100000	0	0	0	1180000	1500000	0	0	0	0	0	0	0	0	0	1180000	0	0	1800000	0	0	1240000
1015221946	260000	1380000	1500000	0	1240000	1920000	0	0	1560000	1140000	0	1740000	1900000	380000	0	1560000	1500000	0	0	0	1580000	2120000	0	0	0	0	0	0	0	1320000	60000	1480000	1280000	0	2220000	840000	1300000	0
1017170505	320000	1240000	1420000	1560000	0	0	0	0	0	0	0	0	0	0	0	60000	0	0	0	0	1240000	0	0	0	0	0	0	0	0	0	0	0	0	0	0	0	0	0
1029155808	280000	220000	1380000	3260000	1260000	4880000	820000	1520000	1960000	1200000	1460000	3380000	3980000	2760000	1760000	1680000	1540000	1040000	1080000	2340000	1620000	2300000	1540000	2300000	1920000	2720000	1980000	2860000	2200000	1300000	1080000	1400000	1320000	2660000	2320000	840000	1280000	1600000
1028828464	40000	1360000	1540000	2880000	0	0	0	0	500000	0	1300000	0	0	2100000	0	1640000	0	0	0	0	1760000	0	0	0	0	0	0	0	0	0	0	0	0	0	0	0	0	1580000
5516064	220000	720000	60000	20000	0	0	0	0	0	0	0	0	0	0	0	0	0	0	0	0	680000	0	0	0	0	0	0	0	0	0	0	0	0	0	0	0	0	0
1029418721	120000	720000	100000	40000	0	0	0	0	1900000	1260000	1440000	0	0	2300000	0	1640000	0	0	0	0	1620000	0	0	0	0	0	0	0	0	0	0	0	0	0	740000	0	0	1600000
1032226045	40000	20000	80000	20000	60000	0	0	0	100000	100000	60000	0	0	40000	0	240000	0	0	0	0	200000	0	0	0	0	0	0	0	0	0	0	40000	0	0	1180000	0	0	280000
1028792000	280000	1460000	1540000	2400000	0	0	0	0	1520000	0	0	0	0	2080000	0	1580000	0	0	0	0	1700000	0	0	0	0	0	0	0	0	0	0	0	0	0	0	0	0	0
1029513725	20000	1440000	1400000	2300000	0	0	0	0	2100000	0	0	0	0	0	0	1560000	0	0	0	0	1600000	0	0	0	0	0	0	0	0	0	0	0	0	0	0	0	0	0
1025974746	0	960000	620000	1440000	0	0	0	0	0	0	0	0	0	0	0	40000	0	0	0	0	1540000	0	0	0	0	0	0	0	0	0	0	0	0	0	0	0	0	0
1032687954	260000	1400000	1380000	60000	0	0	0	0	0	0	0	0	0	0	0	0	0	0	0	0	1400000	0	0	0	0	0	0	0	0	0	0	0	0	0	0	0	0	0
1029465167	100000	1260000	1480000	2460000	0	0	0	0	0	780000	0	0	0	0	0	240000	0	0	0	0	1440000	0	0	0	0	0	0	0	0	0	0	0	0	0	40000	0	0	0
1029412895	120000	940000	680000	1420000	0	0	0	0	1260000	0	1160000	0	0	1900000	0	1200000	0	0	0	0	860000	0	0	0	0	0	0	0	0	0	1040000	0	0	20000	0	800000	0	1320000
1030938429	240000	1160000	1100000	1860000	1000000	1720000	0	0	300000	960000	1200000	1560000	1580000	1860000	0	1360000	1260000	0	0	0	1080000	1720000	0	0	0	0	0	0	0	1100000	40000	1160000	1040000	0	1920000	680000	1000000	1400000
1030392867	0	1560000	680000	0	660000	280000	0	920000	1100000	1140000	1760000	2000000	1740000	2280000	1780000	0	1440000	0	0	2260000	1560000	1960000	0	440000	1380000	1300000	1500000	1960000	180000	1220000	1280000	1200000	1240000	420000	2700000	700000	1000000	260000
1024546245	180000	1380000	1400000	2320000	800000	1280000	400000	1000000	960000	780000	840000	1060000	1340000	1440000	1000000	960000	740000	520000	740000	1740000	1160000	1460000	720000	1260000	940000	1440000	1220000	1600000	1620000	760000	680000	720000	860000	1400000	1480000	580000	760000	1120000
1029411146	280000	1440000	1380000	2360000	0	0	0	0	0	0	0	0	0	0	0	100000	0	0	0	0	1540000	0	0	0	0	0	0	0	0	0	0	0	0	0	0	0	0	0
1020209263	0	40000	1340000	2180000	880000	1360000	400000	20000	1020000	860000	820000	1360000	2560000	1120000	0	1120000	1220000	500000	540000	1720000	140000	2260000	580000	0	0	0	0	0	0	880000	720000	2080000	940000	1300000	3140000	600000	840000	1080000
1024525833	220000	1420000	1200000	1260000	0	0	0	0	0	0	0	0	0	0	0	0	0	0	0	0	1420000	0	0	0	0	0	0	0	0	0	0	0	0	0	0	0	0	0
1029417137	180000	1360000	1420000	2340000	980000	1680000	880000	0	1540000	1180000	1480000	1540000	1280000	2400000	0	1520000	1540000	1040000	1060000	0	1520000	1940000	880000	0	0	0	0	0	0	860000	0	940000	760000	1420000	2360000	0	1280000	1580000
1029094648	260000	1480000	200000	0	0	0	0	0	0	0	0	0	0	0	0	0	0	0	0	0	1980000	0	0	0	0	0	0	0	0	0	0	0	0	0	0	0	0	0
9651219	0	1360000	1440000	2220000	0	0	0	0	0	0	0	0	0	0	0	1140000	0	0	0	0	500000	0	0	0	0	0	0	0	0	0	0	0	0	0	0	0	0	0
1032679050	0	960000	920000	1700000	840000	1320000	0	0	1080000	880000	1120000	1200000	1300000	1760000	0	2000000	1020000	0	0	0	960000	1420000	20000	0	0	0	0	0	0	960000	740000	960000	1200000	1360000	1600000	640000	880000	1960000
11885109	260000	2020000	140000	0	0	0	0	0	0	0	0	0	0	0	0	0	0	0	0	0	1620000	0	0	0	0	0	0	0	0	0	0	0	0	0	0	0	0	0
1018798236	0	100000	500000	0	840000	1380000	520000	320000	0	780000	0	1140000	1460000	0	0	0	1140000	640000	700000	80000	40000	1360000	820000	20000	1160000	0	1220000	1720000	1440000	960000	720000	940000	860000	1360000	2260000	580000	920000	0
1017169080	340000	1420000	1380000	2240000	0	0	0	0	1640000	0	0	0	0	60000	0	1520000	0	0	0	0	1280000	0	0	0	0	0	0	0	0	0	0	0	0	0	0	0	0	0
1029951561	0	1320000	1000000	2240000	0	0	0	0	0	0	2080000	0	0	1380000	0	1400000	0	0	0	0	1480000	0	0	0	0	0	0	0	0	0	0	0	0	0	40000	0	0	1640000
1028415477	360000	1340000	1320000	2280000	1180000	40000	0	0	1680000	1160000	900000	60000	320000	2220000	0	1680000	740000	0	0	0	1640000	1900000	0	160000	0	0	0	0	200000	60000	0	660000	40000	0	4040000	20000	40000	1100000
7400996	220000	1240000	1180000	1500000	0	0	0	0	0	0	0	0	0	0	0	0	0	0	0	0	1160000	0	0	0	0	0	0	0	0	0	0	0	0	0	0	0	0	0
1030126608	0	960000	760000	0	0	0	0	0	0	0	0	0	0	0	0	0	0	0	0	0	900000	0	0	0	0	0	0	0	0	0	0	0	0	0	0	0	0	0
1027213247	260000	1440000	1420000	1960000	1260000	0	0	0	1780000	1740000	1580000	0	0	2440000	0	1860000	40000	0	0	0	1640000	0	0	0	0	0	0	0	0	0	0	560000	0	0	340000	0	0	1720000
1029219063	0	1360000	1380000	160000	0	0	900000	1320000	680000	180000	200000	0	0	40000	660000	0	0	1140000	1040000	2360000	660000	0	140000	660000	1720000	820000	1840000	2640000	2060000	0	0	0	0	60000	0	0	20000	0
11916296	0	0	40000	60000	0	0	0	0	0	0	0	0	0	0	0	0	0	0	0	0	0	0	0	0	0	0	0	0	0	0	0	0	0	0	0	0	0	0
7737214	180000	1160000	1120000	1580000	0	0	0	0	1060000	0	1020000	0	0	2180000	0	0	0	0	0	0	920000	0	0	0	0	0	0	0	0	0	0	0	0	0	0	0	0	460000
1032664410	180000	800000	800000	1300000	0	0	0	0	220000	0	0	0	0	0	0	860000	0	0	0	0	1160000	0	0	0	0	0	0	0	0	0	0	0	0	0	0	0	0	0
1029414509	200000	1360000	1380000	2220000	0	0	0	0	0	0	0	0	0	0	0	1360000	0	0	0	0	1520000	0	0	0	0	0	0	0	0	0	0	0	0	0	0	0	0	0
1021347126	180000	1040000	1400000	1760000	0	0	0	0	1160000	400000	1520000	0	0	1080000	0	1240000	0	0	0	0	1100000	0	0	0	0	0	0	0	0	0	0	0	0	0	60000	0	0	260000
2139053	380000	940000	1380000	60000	0	0	0	0	0	0	0	0	0	0	0	0	0	0	0	0	1460000	0	0	0	0	0	0	0	0	0	0	0	0	0	0	0	0	0
1030661893	0	920000	1080000	400000	0	0	0	0	0	0	0	0	0	0	0	0	0	0	0	0	1180000	0	0	0	0	0	0	0	0	0	0	0	0	0	0	0	0	0
11908523	220000	1040000	1000000	1540000	820000	1460000	520000	1380000	1380000	740000	860000	1440000	1660000	1460000	1200000	1380000	1000000	660000	700000	1480000	1380000	1620000	820000	1420000	1200000	1560000	1360000	1580000	1540000	1040000	780000	940000	1340000	1340000	1460000	660000	1820000	1520000
1698870	0	1360000	1380000	2240000	1280000	1400000	0	0	1180000	1180000	1460000	1680000	1880000	440000	0	1480000	1460000	0	0	0	1500000	1980000	0	0	0	0	0	0	0	0	0	1400000	0	0	2160000	0	0	1580000
1015457763	200000	1480000	1700000	2260000	0	0	0	0	1540000	0	1160000	0	0	2360000	0	1480000	0	0	0	0	1500000	0	0	0	0	0	0	0	0	0	0	0	0	0	0	0	0	0
1029548888	180000	1500000	460000	20000	0	0	0	0	0	0	0	0	0	0	0	0	0	0	0	0	1620000	0	0	0	0	0	0	0	0	0	0	0	0	0	0	0	0	0
1027193624	0	1060000	1540000	2460000	1000000	1740000	660000	1140000	1640000	0	1460000	1380000	1680000	2280000	1320000	1560000	1240000	800000	840000	2040000	1480000	1660000	1020000	1440000	1320000	1740000	1460000	1860000	1740000	1080000	1000000	1140000	1060000	1700000	1060000	700000	1120000	40000
12473862	300000	1420000	1460000	920000	0	0	0	0	600000	0	1520000	0	0	2560000	0	1460000	0	0	0	0	1800000	0	0	0	0	0	0	0	0	0	0	0	0	0	0	0	0	380000
1021106284	260000	1620000	1580000	2560000	1500000	2100000	0	0	1460000	1320000	1320000	1800000	1960000	2440000	0	1520000	1800000	0	0	0	1560000	2280000	0	0	0	0	0	0	0	0	0	1580000	0	0	2820000	0	660000	1780000
1032686617	120000	1420000	1460000	2380000	0	0	0	0	0	0	0	0	0	0	0	700000	0	0	0	0	1580000	0	0	0	0	0	0	0	0	0	0	0	0	0	0	0	0	0
1028632941	0	1380000	1440000	2380000	0	0	0	0	0	0	0	0	0	0	0	40000	0	0	0	0	1540000	0	0	0	0	0	0	0	0	0	0	0	0	0	0	0	0	0
1020704961	40000	920000	1340000	2000000	0	0	0	0	1820000	0	0	0	0	0	0	1240000	0	0	0	0	120000	0	0	0	0	0	0	0	0	0	0	0	0	0	0	0	0	0
1030608107	140000	800000	800000	1520000	20000	0	0	0	880000	620000	840000	0	0	1300000	0	860000	0	0	0	0	860000	0	0	0	0	0	0	0	0	0	0	860000	0	0	1240000	0	0	920000
1023573476	0	0	540000	2300000	0	0	0	0	0	0	0	0	0	0	0	500000	0	0	0	0	880000	0	0	0	0	0	0	0	0	0	0	0	0	0	0	0	0	0
1021055048	340000	1180000	1380000	2040000	0	0	0	0	620000	0	0	0	0	0	0	1440000	0	0	0	0	1440000	0	0	0	0	0	0	0	0	0	0	0	0	0	0	0	0	0
1028814716	100000	760000	700000	1140000	0	420000	400000	620000	780000	0	800000	0	0	1240000	1040000	760000	0	500000	540000	380000	980000	40000	700000	1060000	880000	1220000	920000	1180000	980000	120000	0	0	220000	0	0	0	120000	320000
1030757924	320000	1400000	1640000	4160000	1300000	3740000	0	0	2920000	1240000	1200000	1880000	3940000	2040000	0	3040000	1520000	0	0	0	3420000	4260000	0	0	0	0	0	0	0	1780000	640000	1400000	1220000	0	2180000	840000	3780000	1580000
1022305638	0	40000	1160000	1540000	0	0	0	0	0	0	0	0	0	0	0	1160000	0	0	0	0	160000	0	0	0	0	0	0	0	0	0	0	0	0	0	0	0	0	0
1022198638	0	960000	1340000	20000	0	0	0	0	0	0	0	0	0	0	0	0	0	0	0	0	600000	0	0	0	0	0	0	0	0	0	0	0	0	0	0	0	0	0
1027601155	0	920000	920000	1500000	1240000	1320000	580000	800000	1020000	1020000	1220000	1340000	1720000	1780000	0	1020000	2080000	420000	0	0	0	560000	0	0	0	0	0	0	0	0	0	1160000	0	0	2740000	0	280000	2380000
1031045248	180000	920000	980000	1480000	1480000	960000	0	1160000	1000000	800000	480000	940000	2980000	1500000	1100000	1000000	1760000	0	0	1520000	960000	2340000	0	1060000	0	1160000	0	1200000	1100000	1420000	380000	1680000	1520000	660000	1560000	580000	1940000	0
10996096	40000	20000	20000	40000	20000	20000	0	0	40000	40000	1160000	40000	40000	40000	60000	40000	40000	0	0	0	100000	20000	0	40000	0	100000	0	0	0	0	0	40000	0	0	40000	0	120000	560000
1031007286	260000	1440000	1360000	2340000	1340000	1960000	900000	1200000	1860000	20000	1520000	1680000	1900000	2380000	0	1680000	1640000	980000	1040000	860000	1540000	2280000	1160000	0	1780000	0	1920000	2340000	1980000	1340000	1080000	0	1340000	2080000	0	920000	1380000	1620000
1016645643	240000	1380000	1360000	1540000	0	0	0	0	0	0	0	0	0	0	0	0	0	0	0	0	1460000	0	0	0	0	0	0	0	0	0	0	0	0	0	0	0	0	0
1025512893	0	20000	40000	40000	0	0	0	0	0	0	0	0	0	0	0	500000	0	0	0	0	20000	0	0	0	0	0	0	0	0	0	0	0	0	0	0	0	0	0
1026480494	260000	1360000	1380000	2220000	0	0	0	0	1520000	0	0	0	0	0	0	1580000	0	0	0	0	1580000	0	0	0	0	0	0	0	0	0	0	0	0	0	0	0	0	0
1029522144	360000	1360000	1400000	1080000	1260000	1920000	0	0	840000	1000000	0	1640000	1880000	0	0	800000	1460000	0	0	0	1760000	2020000	0	0	0	0	0	0	0	1280000	0	1400000	0	0	1700000	0	1280000	0
4126168	0	280000	40000	0	0	0	0	0	1920000	1160000	1500000	0	0	3420000	0	1760000	0	0	0	0	180000	0	0	0	0	0	0	0	0	0	0	880000	0	0	5680000	0	0	160000
1027983189	280000	1520000	1440000	2400000	1380000	1520000	980000	1840000	0	1520000	1460000	1740000	1980000	2500000	2080000	440000	960000	580000	1040000	2720000	1500000	1980000	1280000	2300000	980000	2660000	2060000	2420000	2460000	1340000	1100000	1380000	1300000	40000	400000	840000	1380000	1840000
4991821	0	20000	20000	220000	1000000	0	0	0	560000	1320000	1160000	0	0	2640000	0	2040000	1180000	0	840000	0	220000	0	940000	0	0	0	0	0	0	1040000	60000	1160000	1020000	1680000	2020000	0	1060000	1340000
1019106006	200000	780000	760000	1300000	0	0	0	0	60000	0	0	0	0	0	0	820000	0	0	0	0	920000	0	0	0	0	0	0	0	0	0	0	0	0	0	0	0	0	0
1028169302	0	1000000	1580000	2280000	0	0	0	0	0	0	820000	0	0	2480000	0	20000	0	0	0	0	580000	0	0	0	0	0	0	0	0	0	0	0	0	0	0	0	0	0
1016776499	220000	1380000	1380000	2520000	0	0	0	0	1540000	0	0	0	0	0	0	1500000	0	0	0	0	1540000	0	0	0	0	0	0	0	0	0	0	0	0	0	0	0	0	0
1029773609	260000	1400000	1400000	20000	0	0	0	0	0	0	0	0	0	0	0	0	0	0	0	0	1620000	0	0	0	0	0	0	0	0	0	0	0	0	0	0	0	0	0
1029742148	0	1240000	1520000	2420000	0	0	0	0	0	20000	0	0	0	60000	0	660000	0	0	0	0	1260000	0	0	0	0	0	0	0	0	0	0	0	0	0	0	0	0	0
1028860652	260000	1360000	1520000	1320000	0	1920000	1040000	1200000	1560000	0	0	1460000	1680000	0	0	0	0	960000	700000	2240000	1520000	1880000	1160000	220000	1720000	0	1860000	2340000	2060000	340000	860000	0	740000	1340000	0	620000	600000	0
1023763516	0	1280000	1380000	20000	0	0	0	0	0	0	0	0	0	0	0	0	0	0	0	0	1040000	0	0	0	0	0	0	0	0	0	0	0	0	0	0	0	0	0
12854385	240000	1400000	1500000	2280000	0	0	0	0	440000	0	0	0	0	0	0	1500000	0	0	0	0	1520000	0	0	0	0	0	0	0	0	0	0	0	0	0	0	0	0	0
8197375	0	960000	1080000	1800000	0	0	540000	60000	1260000	0	1000000	0	0	1580000	0	1220000	0	920000	740000	0	940000	0	1120000	0	0	0	0	0	0	0	780000	0	0	1580000	0	580000	0	1060000
11052847	20000	880000	720000	1260000	840000	1060000	580000	840000	1380000	780000	1260000	1040000	1080000	2120000	200000	1280000	1020000	620000	620000	1220000	1040000	1440000	440000	440000	380000	60000	700000	1580000	1380000	880000	680000	940000	840000	920000	1540000	580000	940000	1320000
1021385590	0	40000	1440000	2200000	0	0	0	0	0	0	0	0	0	0	0	0	0	0	0	0	0	0	0	0	0	0	0	0	0	0	0	0	0	0	0	0	0	0
1020723210	200000	940000	200000	0	0	0	0	0	0	0	0	0	0	0	0	0	0	0	0	0	1200000	0	0	0	0	0	0	0	0	0	0	0	0	0	0	0	0	0
1017238756	280000	60000	1400000	1820000	0	0	0	0	0	0	0	0	0	0	0	0	0	180000	100000	0	1520000	0	0	0	0	0	0	0	0	0	0	0	0	0	0	0	0	0
1023744874	220000	1020000	1120000	1100000	0	0	0	0	60000	0	0	0	0	40000	0	860000	0	0	0	0	1240000	0	0	0	0	0	0	0	0	0	0	0	0	0	0	0	0	0
1029818902	0	120000	40000	40000	0	0	0	0	20000	1220000	0	0	0	0	0	1220000	0	0	0	0	0	0	0	0	0	0	0	0	0	0	0	0	0	0	420000	0	0	0
1023357146	180000	1100000	340000	0	0	0	0	0	0	0	0	0	0	0	0	0	0	0	0	0	1000000	0	0	0	0	0	0	0	0	0	0	0	0	0	0	0	0	0
1029547011	320000	1540000	1400000	2240000	1240000	1920000	0	0	1580000	1220000	1460000	1680000	1880000	2340000	0	1580000	1480000	0	0	1360000	1960000	2020000	0	0	0	0	0	20000	1320000	1300000	0	1400000	540000	0	2180000	0	1280000	1640000
1031274459	0	1340000	1360000	60000	1240000	0	0	0	420000	1140000	600000	600000	0	2460000	0	0	1460000	0	0	0	1300000	1960000	0	0	0	0	0	0	0	0	0	1380000	0	0	2220000	0	0	1820000
3589944	300000	1420000	1120000	0	0	0	0	0	0	0	0	0	0	0	0	0	0	0	0	0	1600000	0	0	0	0	0	0	0	0	0	0	0	0	0	0	0	0	0
11737900	160000	800000	800000	1080000	0	0	0	0	740000	0	0	0	0	0	0	860000	0	0	0	0	860000	0	0	0	0	0	0	0	0	0	0	0	0	0	0	0	0	0
1016881634	240000	1480000	1420000	2260000	1020000	1300000	560000	880000	1840000	1220000	1460000	1260000	1340000	1880000	0	1520000	1180000	460000	760000	80000	1560000	1620000	860000	0	0	0	0	0	0	400000	1080000	1300000	0	2160000	2300000	0	1100000	1420000
1032098388	220000	1080000	880000	1400000	0	0	0	0	200000	0	0	0	0	0	0	1060000	0	0	0	0	1060000	0	0	0	0	0	0	0	0	0	0	0	0	0	0	0	0	0
1026972528	0	1340000	1360000	2100000	0	0	0	0	0	0	0	0	0	0	0	0	0	0	0	0	580000	0	0	0	0	0	0	0	0	0	0	0	0	0	0	0	0	0
1018298919	160000	20000	340000	120000	860000	660000	0	0	1020000	580000	980000	1360000	1080000	1580000	0	120000	1180000	0	0	0	20000	1520000	0	0	0	0	0	0	0	1100000	0	60000	740000	0	1460000	500000	760000	180000
1020162420	0	180000	640000	0	0	0	0	0	420000	0	0	0	0	0	0	0	0	0	0	0	0	0	0	0	0	0	0	0	0	0	0	0	0	0	0	0	0	0
1029382881	260000	1080000	840000	1140000	680000	2020000	820000	1420000	1120000	900000	1420000	1680000	1880000	2260000	2400000	760000	1040000	620000	1080000	2200000	1500000	2100000	1200000	2140000	1660000	2420000	1800000	2260000	2140000	1160000	1140000	1080000	1240000	1820000	1880000	820000	1280000	1640000
1025058461	260000	1360000	980000	0	0	0	0	0	0	0	0	0	0	0	0	0	0	0	0	0	1480000	0	0	0	0	0	0	0	0	0	0	0	0	0	0	0	0	0
1029744689	0	1060000	1160000	1340000	0	0	0	0	1540000	0	1200000	0	0	2160000	0	300000	0	0	0	0	1280000	0	0	0	0	0	0	0	0	0	0	0	0	0	0	0	0	1520000
1026656648	80000	900000	1040000	1080000	900000	1400000	660000	480000	1100000	780000	1460000	1220000	1280000	1640000	0	1020000	1160000	760000	600000	0	960000	1420000	440000	0	0	0	0	0	0	920000	620000	880000	1120000	1240000	1740000	780000	860000	1140000
1032139263	0	1400000	20000	0	0	1880000	820000	1200000	0	0	0	1720000	1820000	0	2040000	0	0	860000	1040000	2180000	1520000	1760000	1480000	2160000	1720000	1380000	1800000	2440000	1860000	1360000	1100000	0	1240000	2000000	0	840000	1180000	0
1032847539	260000	500000	940000	0	0	0	0	0	0	0	0	0	0	0	0	0	0	0	0	0	1120000	0	0	0	0	0	0	0	0	0	0	0	0	0	0	0	0	0
1031608058	280000	1440000	1520000	2240000	0	0	0	0	0	0	0	0	0	0	0	1380000	0	0	0	0	1780000	0	0	0	0	0	0	0	0	0	0	0	0	0	0	0	0	0
1020764211	140000	740000	800000	1140000	20000	0	1100000	1160000	820000	680000	940000	700000	0	1220000	0	900000	760000	760000	800000	1260000	920000	800000	20000	1360000	0	0	0	0	1280000	660000	580000	1020000	680000	0	1080000	640000	680000	900000
9844386	320000	2000000	1380000	40000	0	1440000	0	0	0	0	0	1140000	1340000	20000	0	660000	0	0	0	0	1720000	0	0	0	0	0	0	0	0	880000	0	0	0	0	0	0	880000	40000
1023192510	0	560000	340000	1160000	580000	1260000	860000	740000	500000	680000	780000	0	260000	1000000	960000	560000	780000	700000	700000	1720000	840000	20000	800000	1420000	1120000	1800000	1380000	1740000	1480000	860000	620000	1000000	900000	1260000	1700000	940000	760000	1260000
5025826	0	1540000	1640000	600000	0	0	0	0	0	0	0	0	0	0	0	0	0	0	0	0	1600000	0	0	0	0	0	0	0	0	0	0	0	0	0	0	0	0	0
1027696210	0	2460000	840000	0	0	0	0	0	0	0	0	0	0	20000	0	0	0	0	0	0	1600000	0	0	0	0	0	0	0	0	0	0	0	0	0	0	0	0	0
12617995	220000	1380000	600000	0	0	0	0	0	0	0	0	0	0	0	0	0	0	0	0	0	1180000	0	0	0	0	0	0	0	0	0	0	0	0	0	0	0	0	0
8243553	40000	0	800000	2540000	1380000	1380000	0	0	1860000	960000	1660000	1680000	2160000	2600000	0	1700000	1560000	0	0	0	2040000	1920000	0	0	0	0	0	0	0	0	0	1780000	0	0	1620000	0	1320000	1380000
1029356532	100000	1280000	1160000	1980000	0	0	0	0	120000	0	180000	0	0	1860000	0	0	0	0	0	0	1440000	0	0	0	0	0	0	0	0	0	0	0	0	0	0	0	0	0
10367902	300000	1440000	1380000	2380000	1240000	260000	0	0	1600000	1160000	1440000	1420000	860000	2360000	1640000	1600000	1460000	0	0	2040000	1560000	1900000	1000000	0	1060000	0	1780000	2280000	1880000	1260000	1060000	1300000	1260000	2000000	2400000	840000	1280000	1600000
1029890917	140000	1360000	540000	0	0	0	0	0	0	0	0	0	0	0	0	0	0	0	0	0	1360000	0	0	0	0	0	0	0	0	0	0	0	0	0	0	0	0	0
1021180382	260000	2020000	420000	0	0	0	0	0	0	0	0	0	0	0	0	0	0	0	0	0	1540000	0	0	0	0	0	0	0	0	0	0	0	0	0	0	0	0	0
1032844107	200000	1440000	820000	80000	0	0	0	0	180000	0	0	0	0	0	0	1540000	0	0	0	0	1260000	0	0	0	0	0	0	0	0	0	0	0	0	0	0	0	0	0
1015015557	260000	1360000	1380000	2280000	0	0	0	0	1500000	1160000	1440000	0	0	2260000	0	1480000	0	0	0	0	1520000	0	0	0	0	0	0	0	0	0	0	40000	0	0	2240000	0	0	700000
1028169320	260000	1220000	1400000	2240000	0	0	0	0	1560000	0	0	0	0	0	0	1520000	0	0	0	0	1460000	0	0	0	0	0	0	0	0	0	0	0	0	0	0	0	0	0
1029939292	0	960000	920000	1860000	0	1940000	0	0	0	440000	0	1620000	1820000	0	0	1240000	0	0	0	0	1040000	2020000	0	0	0	0	0	0	0	0	0	0	0	0	0	0	40000	0
5518081	40000	1780000	1400000	2420000	0	0	0	0	1180000	0	0	0	0	20000	0	0	0	0	0	0	1680000	0	0	0	0	0	0	0	0	0	0	0	0	0	0	0	0	0
1020105528	260000	1100000	1180000	1860000	980000	1700000	580000	1240000	940000	1080000	1480000	1380000	1720000	1880000	1340000	1260000	1340000	840000	980000	1660000	1280000	1780000	1020000	2000000	1440000	1380000	1300000	1880000	1640000	1060000	900000	1120000	1020000	1720000	1780000	700000	1040000	1340000
1030239619	360000	1360000	1400000	120000	0	0	0	0	0	0	0	0	0	0	0	0	0	0	0	0	1620000	0	0	0	0	0	0	0	0	0	0	0	0	0	0	0	0	0
1017370881	260000	1100000	40000	0	0	0	0	0	0	0	0	0	0	0	0	0	0	0	0	0	1480000	0	0	0	0	0	0	0	0	0	0	0	0	0	0	0	0	0
1029126559	200000	1040000	1080000	1540000	380000	0	0	0	1200000	560000	800000	0	0	1200000	0	1200000	280000	0	0	0	760000	0	0	0	0	0	0	0	0	0	0	360000	0	0	720000	0	0	880000
1017456075	80000	1340000	300000	620000	0	0	0	0	0	0	0	0	0	0	0	0	0	0	0	0	1480000	0	0	0	0	0	0	0	0	0	0	0	0	0	0	0	0	0
1028056989	260000	1400000	1400000	2260000	0	0	0	0	1580000	0	0	0	0	0	0	1500000	0	0	0	0	1480000	0	0	0	0	0	0	0	0	0	0	0	0	0	0	0	0	0
1019634963	20000	840000	740000	560000	0	0	0	0	1020000	0	0	0	0	160000	0	1020000	0	0	0	0	860000	0	0	0	0	0	0	0	0	0	0	0	0	0	0	0	0	0
502812	100000	1520000	1420000	2000000	0	2060000	820000	1240000	640000	1160000	1560000	1700000	1900000	2300000	0	1260000	0	1000000	1060000	2740000	1580000	2340000	1240000	0	0	0	0	120000	2060000	1340000	1140000	620000	1280000	1880000	2220000	920000	1320000	1740000
1030525314	0	980000	1080000	1300000	0	0	0	0	1500000	0	1840000	0	0	2300000	0	1520000	0	0	0	0	980000	0	0	0	0	0	0	0	0	0	0	0	0	0	0	0	0	580000
10950436	80000	1380000	1440000	2360000	0	0	0	0	1520000	0	0	0	0	200000	0	1500000	0	0	0	0	1480000	0	0	0	0	0	0	0	0	0	0	0	0	0	0	0	0	0
1024325234	240000	1200000	1720000	1720000	860000	1940000	0	0	1120000	780000	980000	1660000	1780000	1560000	0	1060000	1040000	0	0	0	1160000	1640000	0	0	0	0	0	0	0	1300000	0	940000	120000	0	1440000	0	1260000	1080000
1029490854	60000	0	1380000	2240000	0	1920000	0	0	1520000	0	160000	1680000	1880000	2240000	0	1480000	880000	0	0	0	20000	1980000	720000	0	0	0	0	0	0	0	0	0	0	1180000	0	0	940000	0
1301955	0	1360000	40000	0	0	0	0	0	0	0	0	0	0	0	0	0	0	0	0	0	0	0	0	0	0	0	0	0	0	0	0	0	0	0	0	0	0	0
6919508	200000	780000	780000	160000	0	0	0	0	0	0	0	0	0	0	0	0	0	0	0	0	860000	0	0	0	0	0	0	0	0	0	0	0	0	0	0	0	0	0
1025882534	0	1560000	1240000	2400000	1400000	0	0	0	560000	1220000	1460000	0	0	2360000	0	100000	1240000	0	0	0	780000	1020000	0	0	0	0	0	0	0	0	0	2040000	0	0	2700000	0	0	1640000
1029578097	0	0	1420000	1000000	0	0	0	0	0	0	0	0	0	0	0	0	0	0	0	0	0	0	0	0	0	0	0	0	0	0	0	0	0	0	0	0	0	0
1032638704	200000	1400000	1420000	2380000	2740000	20000	780000	120000	1060000	2320000	1180000	5160000	3340000	2280000	0	0	2980000	980000	1060000	0	20000	5040000	1180000	2120000	0	0	0	0	1000000	1220000	1060000	2720000	1680000	1960000	2280000	1660000	1280000	2440000
1029944104	80000	920000	920000	1660000	0	0	0	0	1080000	840000	1560000	0	0	1800000	0	1160000	0	0	0	0	940000	0	0	0	0	0	0	0	0	0	0	360000	0	0	1980000	0	0	2740000
1025198378	60000	520000	1260000	1900000	1080000	1360000	0	0	1620000	960000	880000	1160000	1320000	1900000	0	1500000	1240000	0	0	0	220000	1400000	0	0	0	0	0	0	0	0	0	1180000	0	0	2460000	0	960000	1180000
1026360015	160000	860000	1280000	1660000	0	0	0	0	680000	0	0	0	0	0	0	900000	0	0	0	0	380000	0	0	0	0	0	0	0	0	0	0	0	0	0	0	0	0	0
6081801	200000	1500000	680000	2320000	0	0	0	0	1540000	0	0	0	0	560000	0	1520000	0	0	0	0	1660000	0	0	0	0	0	0	0	0	0	0	0	0	0	0	0	0	0
6915317	0	40000	20000	1000000	0	0	0	0	0	0	0	0	0	140000	0	60000	0	0	0	0	60000	0	0	0	0	0	0	0	0	0	0	0	0	0	0	0	0	0
1216770	380000	1580000	1480000	2080000	0	0	0	0	1560000	20000	1460000	0	0	2260000	0	1500000	0	0	0	0	1720000	0	0	0	0	0	0	0	0	0	0	0	0	0	0	0	0	1480000
7777097	200000	1540000	40000	0	0	0	0	0	0	0	0	0	0	0	0	0	0	0	0	0	1460000	0	0	0	0	0	0	0	0	0	0	0	0	0	0	0	0	0
1026889507	560000	2760000	2960000	4480000	1420000	0	0	0	2640000	3420000	2960000	700000	0	7280000	0	2660000	1560000	0	0	0	3200000	2000000	0	0	0	0	0	0	0	0	0	1460000	0	0	4660000	0	0	2840000
8087023	260000	1400000	1380000	2240000	1240000	0	0	0	820000	3020000	2880000	0	0	4520000	0	1440000	1480000	0	0	0	1500000	0	0	0	0	0	0	0	0	0	0	1400000	0	0	3580000	0	0	3160000
1030442796	0	1500000	20000	0	0	0	0	0	0	0	0	0	0	0	0	0	0	0	0	0	1880000	0	0	0	0	0	0	0	0	0	0	0	0	0	0	0	0	0
1029630311	140000	1200000	100000	0	0	0	0	0	0	0	0	0	0	0	0	0	0	0	0	0	1140000	0	0	0	0	0	0	0	0	0	0	0	0	0	0	0	0	0
1017600968	240000	1340000	380000	0	0	0	0	0	160000	0	900000	0	0	3220000	0	0	0	0	0	0	1080000	0	0	0	0	0	0	0	0	0	0	0	0	0	0	0	0	0
1029746324	80000	740000	1060000	1920000	1240000	0	440000	460000	1520000	1380000	1780000	0	0	2400000	2040000	1260000	4200000	260000	0	760000	1520000	0	0	480000	2240000	420000	1700000	2060000	800000	0	0	1480000	0	0	2480000	0	0	1080000
10764770	160000	1340000	1080000	0	0	0	0	0	0	0	0	0	0	0	0	0	0	0	0	0	1400000	0	0	0	0	0	0	0	0	0	0	0	0	0	0	0	0	0
1028276714	220000	1380000	100000	0	0	0	0	0	0	0	0	0	0	0	0	0	0	0	0	0	1480000	0	0	0	0	0	0	0	0	0	0	0	0	0	0	0	0	0
1015640335	260000	1360000	1380000	2220000	0	0	0	0	0	0	0	0	0	0	0	40000	0	0	0	0	1520000	0	0	0	0	0	0	0	0	0	0	0	0	0	0	0	0	0
1029420291	0	400000	140000	1160000	0	0	0	0	0	0	0	0	0	0	0	40000	0	0	0	0	460000	0	0	0	0	0	0	0	0	0	0	0	0	0	0	0	0	0
1028684340	220000	1720000	1400000	1900000	0	0	0	0	1360000	0	0	0	0	0	0	1480000	0	0	0	0	3280000	0	0	0	0	0	0	0	0	0	0	0	0	0	0	0	0	0
6091653	240000	1360000	1380000	3060000	0	0	0	0	0	0	1440000	0	0	2240000	0	480000	0	0	0	0	1640000	0	0	0	0	0	0	0	0	0	0	0	0	0	0	0	0	1580000
1018881885	0	880000	480000	0	0	0	0	0	0	0	0	0	0	0	0	0	0	0	0	0	140000	0	0	0	0	0	0	0	0	0	0	0	0	0	0	0	0	0
1031045758	260000	1380000	1660000	1380000	0	0	0	0	0	0	0	0	0	0	0	0	0	0	0	0	1500000	0	0	0	0	0	0	0	0	0	0	0	0	0	0	0	0	0
1028848661	0	0	600000	2680000	0	0	0	0	0	0	0	0	0	0	0	60000	0	0	0	0	1520000	0	0	0	0	0	0	0	0	0	0	0	0	0	0	0	0	0
1030860194	260000	1120000	1380000	1080000	0	0	0	0	0	0	0	0	0	0	0	0	0	0	0	0	1380000	0	0	0	0	0	0	0	0	0	0	0	0	0	0	0	0	0
1016670096	0	1360000	1640000	720000	0	0	0	0	0	0	0	0	0	0	0	0	0	0	0	0	1480000	0	0	0	0	0	0	0	0	0	0	0	0	0	0	0	0	0
1028601165	260000	1400000	1380000	2260000	1260000	1980000	20000	0	1600000	1180000	1480000	1720000	1940000	2220000	0	1480000	1520000	1020000	1080000	0	1540000	2040000	1240000	0	0	0	0	0	0	1120000	560000	1400000	1060000	2140000	2240000	420000	1340000	1600000
1836114	0	560000	500000	0	0	0	0	0	0	0	0	0	0	0	0	0	0	0	0	0	580000	0	0	0	0	0	0	0	0	0	0	0	0	0	0	0	0	0
2016195	160000	700000	700000	1140000	640000	1000000	0	0	780000	600000	740000	860000	960000	1160000	0	740000	760000	0	0	0	780000	1000000	0	0	0	0	0	0	0	560000	440000	740000	420000	880000	1100000	300000	520000	820000
1017270697	0	1280000	560000	0	0	0	0	0	0	0	0	0	0	0	0	0	0	0	0	0	1380000	0	0	0	0	0	0	0	0	0	0	0	0	0	0	0	0	0
1029385260	320000	660000	20000	2500000	1060000	0	0	0	680000	1160000	0	1480000	100000	20000	1640000	60000	1240000	20000	40000	20000	800000	40000	580000	1920000	6100000	2380000	7120000	22140000	13560000	20000	0	1280000	20000	1960000	2160000	0	20000	0
1028892659	260000	1460000	1480000	2260000	1300000	1920000	780000	1220000	1540000	1280000	1020000	0	0	1180000	2160000	1480000	1540000	980000	1100000	1980000	1560000	560000	940000	2140000	1420000	2460000	800000	1480000	1160000	1100000	860000	1460000	1000000	2000000	2180000	740000	1340000	1440000
1019699445	120000	700000	740000	1320000	0	0	0	0	0	0	0	0	0	0	0	60000	0	0	0	0	760000	0	0	0	0	0	0	0	0	0	0	0	0	0	0	0	0	0
1017805189	0	20000	1040000	400000	0	0	0	0	0	0	0	0	0	340000	0	0	0	0	0	0	40000	0	0	0	0	0	0	0	0	0	0	0	0	0	0	0	0	0
1028465701	120000	1660000	380000	0	0	0	0	0	0	0	0	0	0	0	0	0	0	0	0	0	1760000	0	0	0	0	0	0	0	0	0	0	0	0	0	0	0	0	0
1028848067	280000	1460000	1460000	2280000	0	0	0	0	0	940000	1540000	0	0	2300000	0	540000	0	0	0	0	1540000	0	0	0	0	0	0	0	0	0	0	100000	0	0	1540000	0	0	1640000
1028428069	0	900000	240000	0	0	0	0	0	0	0	0	0	0	0	0	0	0	0	0	0	1100000	0	0	0	0	0	0	0	0	0	0	0	0	0	0	0	0	0
1025558286	0	820000	860000	840000	0	0	0	0	0	0	0	0	0	0	0	0	0	0	0	0	920000	0	0	0	0	0	0	0	0	0	0	0	0	0	0	0	0	0
1668100	260000	1380000	1000000	1820000	0	0	100000	620000	1160000	40000	20000	0	0	40000	0	760000	0	460000	500000	1100000	1460000	0	600000	1640000	540000	1240000	480000	0	20000	0	20000	0	0	0	0	0	0	320000
1032519739	0	0	880000	1500000	740000	0	0	0	900000	640000	740000	900000	300000	1340000	0	900000	900000	0	0	0	0	1160000	0	0	0	0	0	0	0	0	0	720000	0	0	1180000	0	0	800000
1031451650	80000	920000	940000	1500000	0	500000	620000	880000	880000	0	0	820000	740000	0	0	940000	0	0	40000	500000	1000000	1040000	0	0	0	0	700000	1120000	1020000	0	0	0	0	0	0	0	20000	0
4064785	0	1120000	860000	1660000	640000	980000	0	0	940000	640000	720000	860000	960000	1160000	0	920000	300000	0	0	0	1180000	100000	440000	1040000	0	360000	0	0	0	660000	540000	720000	660000	1020000	1140000	440000	660000	800000
1016220482	280000	1820000	1520000	1240000	0	0	0	0	0	0	0	0	0	0	0	0	0	0	0	0	1880000	0	0	0	0	0	0	0	0	0	0	0	0	0	0	0	0	0
1029536022	260000	1400000	1380000	1420000	1260000	1800000	800000	1180000	1420000	1160000	1460000	1680000	1900000	2240000	1400000	1300000	1900000	820000	1060000	2140000	1540000	2020000	1100000	2060000	0	2420000	1260000	2340000	1980000	1260000	1000000	1400000	1260000	2020000	2200000	720000	1280000	1620000
1031948718	180000	1300000	1080000	1460000	0	0	0	0	480000	1140000	1180000	0	0	1200000	0	0	0	0	0	0	1480000	0	0	0	0	0	0	0	0	0	0	0	0	0	40000	0	0	1620000
1015115712	180000	1120000	920000	1520000	120000	1920000	920000	1300000	1220000	680000	1000000	0	1660000	1580000	0	960000	0	500000	540000	2560000	1120000	0	600000	0	0	0	680000	1140000	2140000	1280000	540000	800000	520000	1020000	1680000	440000	1260000	1020000
1027922193	0	0	1500000	2440000	1280000	1300000	0	0	1460000	1220000	1500000	1680000	1540000	2280000	0	1500000	1540000	0	0	0	20000	2120000	520000	0	0	0	0	0	0	880000	1060000	1400000	1040000	3700000	2320000	820000	980000	1620000
11138143	0	1940000	1580000	2800000	0	0	0	0	880000	1880000	2280000	0	0	3280000	0	1980000	0	0	0	0	1800000	0	0	0	0	0	0	0	0	0	0	0	0	0	0	0	0	2440000
3529380	200000	820000	940000	1500000	840000	1280000	480000	760000	1320000	780000	980000	1280000	1480000	1600000	1280000	1000000	1020000	600000	680000	1300000	1000000	1580000	940000	1500000	1180000	1420000	1300000	1560000	1600000	840000	780000	980000	780000	1380000	1520000	580000	1000000	1180000
11484608	240000	940000	1020000	1720000	1240000	0	40000	220000	60000	1160000	1440000	0	0	2260000	20000	900000	1480000	160000	140000	240000	1040000	0	0	1060000	0	40000	0	0	300000	20000	80000	1400000	40000	100000	2160000	40000	0	1580000
1017258736	0	1360000	1380000	1040000	0	180000	780000	660000	0	0	0	0	0	20000	0	0	0	1000000	1060000	0	1720000	0	940000	0	0	0	0	0	0	0	0	0	0	0	0	0	0	0
1017340587	0	1380000	1440000	2240000	1260000	1980000	780000	900000	1560000	1140000	1440000	1740000	1980000	2240000	0	1560000	1500000	1000000	740000	1940000	1520000	2000000	1180000	0	260000	0	1900000	2360000	2080000	1320000	1100000	1400000	1300000	2080000	2160000	860000	1280000	1620000
1024221167	120000	1060000	400000	0	0	0	0	0	0	0	0	0	0	0	0	0	0	0	0	0	1060000	0	0	0	0	0	0	0	0	0	0	0	0	0	0	0	0	0
1019910575	0	1540000	1340000	440000	1240000	0	0	0	0	120000	1480000	460000	0	3800000	0	0	1480000	0	0	0	1640000	3620000	480000	0	0	0	0	1560000	2060000	1460000	1060000	180000	1280000	1000000	0	980000	2000000	1560000
1020129915	220000	880000	900000	940000	860000	1820000	1020000	1060000	1400000	1140000	1580000	1720000	3440000	2120000	1180000	1380000	1420000	1400000	1040000	1940000	1060000	1220000	1000000	0	600000	2060000	780000	1280000	1820000	1180000	1040000	1100000	1080000	20000	2300000	900000	1140000	1720000
1019989526	260000	1440000	1420000	2260000	0	0	0	0	1780000	0	0	0	0	1060000	0	1960000	0	0	0	0	1620000	0	0	0	0	0	0	0	0	0	0	0	0	0	0	0	0	0
1672549	240000	1360000	1380000	2260000	0	0	0	0	1520000	0	1520000	0	0	2260000	0	1460000	0	0	0	0	1480000	0	0	0	0	0	0	0	0	0	0	0	0	0	0	0	0	1560000
1032118392	220000	720000	1400000	2000000	0	0	0	0	860000	0	0	0	0	0	0	1700000	0	0	0	0	1060000	0	0	0	0	0	0	0	0	0	0	0	0	0	0	0	0	0
9477500	60000	1460000	520000	0	0	0	0	0	0	0	0	0	0	0	0	0	0	0	0	0	2180000	0	0	0	0	0	0	0	0	0	0	0	0	0	0	0	0	0
1018752220	0	1000000	180000	0	0	0	0	0	0	0	0	0	0	0	0	0	0	0	0	0	640000	0	0	0	0	0	0	0	0	0	0	0	0	0	0	0	0	0
3234916	0	1100000	1220000	1020000	980000	0	0	0	0	920000	1200000	20000	0	1820000	0	480000	1240000	0	0	0	900000	1660000	0	0	0	0	0	0	0	0	0	1160000	0	0	1780000	0	0	1280000
1025891246	360000	1340000	1120000	0	0	0	0	0	200000	0	0	0	0	40000	0	0	0	0	0	0	1560000	0	0	0	0	0	0	0	0	0	0	0	0	0	0	0	0	0
1701133	20000	1260000	1120000	1780000	0	0	0	0	500000	0	0	0	0	0	0	1860000	0	0	0	0	1420000	0	0	0	0	0	0	0	0	0	0	0	0	0	0	0	0	0
1029252010	120000	1340000	1500000	2320000	0	0	0	0	1500000	0	0	0	0	720000	0	1480000	0	0	0	0	1520000	0	0	0	0	0	0	0	0	0	0	0	0	0	0	0	0	0
9277553	0	1460000	1380000	20000	0	0	0	0	0	0	0	0	0	0	0	0	0	0	0	0	1500000	0	0	0	0	0	0	0	0	0	0	0	0	0	0	0	0	0
1021079879	0	740000	960000	420000	0	0	760000	1280000	0	0	0	0	0	1680000	1040000	0	0	1000000	1020000	820000	860000	0	1200000	1160000	1260000	1860000	1800000	2360000	2160000	1300000	1060000	0	1340000	2040000	0	840000	1280000	0
1018234560	80000	1000000	900000	0	40000	1400000	480000	700000	0	1240000	1280000	1260000	1280000	2400000	1220000	0	1360000	600000	620000	1320000	900000	2040000	1300000	1300000	1000000	1680000	1100000	1380000	1180000	1360000	1080000	0	1360000	2400000	1420000	880000	1300000	1720000
1028433427	320000	2860000	3080000	4600000	2520000	0	0	0	1120000	1820000	1620000	1620000	820000	1940000	0	940000	3000000	0	0	0	3200000	2880000	0	0	0	0	0	0	0	0	0	2900000	0	0	4240000	0	0	1680000
1027788870	0	0	480000	1900000	0	0	0	0	0	0	0	0	0	0	0	740000	0	0	0	0	0	0	0	0	0	0	0	0	0	0	0	0	0	0	0	0	0	0
1027921383	320000	1580000	1620000	2540000	1280000	1940000	1140000	580000	2880000	1980000	1420000	1700000	1780000	1020000	1060000	1840000	1500000	1040000	1040000	2220000	2120000	2240000	1180000	2380000	1820000	2740000	1200000	2440000	2280000	1340000	1060000	1420000	1300000	2740000	4140000	900000	2140000	1640000
8153191	180000	1200000	1440000	1860000	0	0	0	0	1260000	0	0	0	0	40000	0	1380000	0	0	0	0	1200000	0	0	0	0	0	0	0	0	0	0	0	0	0	0	0	0	0
1015566352	40000	1000000	1000000	1720000	620000	1360000	480000	640000	1000000	80000	20000	960000	880000	220000	0	960000	520000	540000	780000	680000	940000	1120000	820000	0	0	0	0	0	0	880000	660000	560000	240000	1540000	540000	520000	860000	60000
11310543	60000	500000	660000	1340000	0	0	0	0	200000	0	0	0	0	80000	0	600000	0	0	0	0	880000	0	0	0	0	0	0	0	0	0	0	0	0	0	0	0	0	0
1029631055	0	60000	1420000	2320000	0	0	0	0	1920000	0	0	0	0	1380000	0	1540000	0	0	0	0	180000	0	0	0	0	0	0	0	0	0	0	0	0	0	0	0	0	0
1015128963	0	700000	700000	1140000	0	0	0	0	760000	0	740000	0	0	1140000	0	760000	0	0	0	0	820000	0	0	0	0	0	0	0	0	0	0	0	0	0	0	0	0	0
5407976	300000	780000	1220000	1820000	1300000	1280000	620000	1080000	1080000	1260000	1000000	1840000	1960000	1620000	1640000	880000	1520000	820000	880000	1820000	1240000	2120000	1040000	1820000	1440000	2160000	1540000	1980000	1700000	1140000	860000	1600000	1060000	1620000	2160000	760000	1040000	1760000
1029156853	260000	1440000	1200000	840000	0	0	0	0	0	0	0	0	0	0	0	0	0	0	0	0	1340000	0	0	0	0	0	0	0	0	0	0	0	0	0	0	0	0	0
1030037222	60000	1400000	1380000	2300000	1260000	0	0	0	1540000	1280000	1460000	0	0	2220000	0	0	1460000	0	0	0	1560000	0	0	0	0	0	0	0	0	0	0	1440000	0	0	2280000	0	0	1620000
1023801036	200000	1160000	1120000	1860000	1240000	0	780000	1200000	1800000	1940000	1060000	0	0	1820000	4080000	1200000	1480000	1000000	1040000	2240000	1240000	20000	1160000	2180000	1720000	6660000	1820000	2340000	2080000	1280000	1060000	1480000	1200000	1840000	1820000	820000	1260000	1180000
2499088	280000	1540000	1540000	2440000	0	0	0	0	1620000	0	0	0	0	80000	0	1580000	0	0	0	0	400000	0	0	0	0	0	0	0	0	0	0	0	0	0	0	0	0	0
5886414	0	1280000	1320000	1720000	0	0	0	0	0	0	0	0	0	0	0	60000	0	0	0	0	200000	0	0	0	0	0	0	0	0	0	0	0	0	0	0	0	0	0
1021413970	0	1360000	20000	0	0	0	0	0	0	0	0	0	0	0	0	0	0	0	0	0	1360000	0	0	0	0	0	0	0	0	0	0	0	0	0	0	0	0	0
1029845302	0	0	920000	2380000	0	0	0	0	1120000	0	0	0	0	0	0	1620000	0	0	0	0	0	0	0	0	0	0	0	0	0	0	0	0	0	0	0	0	0	0
1028079759	0	0	680000	2220000	1260000	0	0	0	1600000	1180000	1540000	0	0	2440000	0	1140000	1320000	0	0	0	0	0	0	0	0	0	0	0	0	0	0	1460000	0	0	840000	0	0	1920000
4035220	200000	760000	600000	560000	1160000	20000	20000	0	160000	760000	840000	700000	560000	1660000	80000	600000	1000000	320000	640000	0	680000	40000	1440000	0	0	0	0	0	0	840000	520000	740000	460000	620000	1600000	340000	1080000	720000
1028137064	260000	1380000	1380000	40000	0	0	0	0	0	0	0	0	0	0	0	0	0	0	0	0	1560000	0	0	0	0	0	0	0	0	0	0	0	0	0	0	0	0	0
1029474768	0	360000	1100000	1780000	0	0	0	0	0	0	0	0	0	0	0	140000	0	0	0	0	1120000	0	0	0	0	0	0	0	0	0	0	0	0	0	0	0	0	0
1030313359	260000	1720000	1340000	2280000	0	0	0	0	0	0	0	0	0	0	0	1360000	0	0	0	0	1500000	0	0	0	0	0	0	0	0	0	0	0	0	0	0	0	0	0
1025857541	0	1080000	1420000	2020000	0	0	0	0	0	0	0	0	0	0	0	0	0	0	0	0	880000	0	0	0	0	0	0	0	0	0	0	0	0	0	0	0	0	0
1030921600	0	1400000	1420000	2280000	1320000	1800000	0	0	40000	1180000	1520000	1620000	2720000	2460000	0	0	1500000	0	0	0	1700000	520000	0	0	0	0	0	0	0	0	0	1440000	0	0	2200000	0	0	1640000
1031635250	280000	1560000	1480000	2380000	0	0	0	0	2420000	0	0	0	0	2460000	0	1540000	0	0	0	0	1700000	0	0	0	0	0	0	0	0	0	0	0	0	0	0	0	0	0
1028829815	20000	1380000	1380000	4360000	0	0	0	0	1500000	0	1260000	0	0	1880000	0	1340000	0	0	0	0	0	0	0	0	0	0	0	0	0	0	0	0	0	0	0	0	0	1800000
1018322036	0	1380000	20000	0	0	0	0	0	0	0	0	0	0	40000	0	0	0	0	0	0	3040000	0	0	0	0	0	0	0	0	0	0	0	0	0	0	0	0	0
12180212	220000	1160000	1100000	1800000	0	0	0	0	1160000	0	1200000	0	0	1620000	0	1240000	0	0	0	0	1200000	0	0	0	0	0	0	0	0	0	0	0	0	0	0	0	0	1300000
1019540937	0	0	440000	0	0	0	0	0	0	0	0	0	0	0	0	0	0	0	0	0	0	0	0	0	0	0	0	0	0	0	0	0	0	0	0	0	0	0
1028176369	0	1360000	1420000	480000	0	0	0	0	0	0	0	0	0	0	0	20000	0	0	0	0	1360000	0	0	0	0	0	0	0	0	0	0	0	0	0	0	0	0	0
1031075880	200000	1260000	880000	2360000	1260000	0	0	0	1660000	1220000	1480000	20000	0	2500000	0	1660000	1540000	0	0	0	960000	2080000	0	0	0	0	0	0	0	0	0	1440000	0	0	2380000	0	0	1720000
1025911758	0	0	60000	0	0	0	0	0	0	0	0	0	0	0	0	0	0	0	0	0	0	0	0	0	0	0	0	0	0	0	0	0	0	0	0	0	0	0
1030309458	260000	1360000	1400000	2280000	0	0	0	0	0	0	0	0	0	0	0	460000	0	0	0	0	1480000	0	0	0	0	0	0	0	0	0	0	0	0	0	0	0	0	0
1029511769	260000	840000	1280000	2220000	0	0	0	0	20000	0	0	0	0	0	0	840000	0	0	0	0	1480000	0	0	0	0	0	0	0	0	0	0	0	0	0	0	0	0	0
1019407425	280000	2800000	3040000	500000	1240000	0	0	0	0	1180000	0	0	0	2300000	0	0	640000	0	0	0	2840000	0	0	0	0	0	0	0	0	0	0	1400000	0	0	2160000	0	0	0
1030037692	0	1360000	1420000	2020000	0	0	0	0	0	0	0	0	0	0	0	0	0	0	0	0	1000000	0	0	0	0	0	0	0	0	0	0	0	0	0	0	0	0	0
5844512	0	1280000	1540000	1780000	1280000	1300000	640000	860000	880000	0	40000	0	1380000	1700000	0	1060000	0	0	0	1060000	620000	0	0	0	420000	0	980000	1720000	1680000	0	0	1060000	0	0	0	0	0	0
1030044175	400000	1340000	1340000	2220000	0	0	0	0	80000	0	0	0	0	0	0	1460000	0	0	0	0	1500000	0	0	0	0	0	0	0	0	0	0	0	0	0	0	0	0	0
1030053199	40000	1400000	220000	0	0	0	0	0	0	0	0	0	0	0	0	0	0	0	0	0	1580000	0	0	0	0	0	0	0	0	0	0	0	0	0	0	0	0	0
1515418	20000	1380000	160000	0	0	0	0	0	0	0	940000	0	0	1480000	0	0	0	0	0	0	1480000	0	0	0	0	0	0	0	0	0	0	0	0	0	0	0	820000	20000
1028122627	0	1360000	1320000	2240000	1240000	0	0	0	0	1260000	1420000	0	0	3280000	0	1240000	1480000	0	0	0	1520000	0	0	0	0	0	0	0	0	0	0	1300000	0	0	1780000	0	0	1600000
1024067795	240000	1380000	1380000	2180000	0	0	0	0	1440000	0	0	0	0	0	0	1000000	0	0	0	0	1560000	0	0	0	0	0	0	0	0	0	0	0	0	0	0	0	0	0
12630690	220000	1080000	1100000	880000	0	0	0	0	0	0	0	0	0	0	0	0	0	0	0	0	1180000	0	0	0	0	0	0	0	0	0	0	0	0	0	0	0	0	0
1020976390	0	1420000	1420000	2360000	1920000	2240000	0	0	1720000	1840000	1860000	1880000	1880000	4600000	0	1640000	1700000	0	0	0	2100000	2260000	0	0	0	0	0	0	0	1120000	580000	1800000	320000	2680000	2440000	0	1660000	1900000
1027690275	80000	1020000	960000	1560000	220000	1340000	60000	400000	1140000	840000	1500000	1360000	1340000	1500000	0	1120000	1200000	140000	320000	1080000	1000000	1360000	240000	0	0	0	0	40000	1140000	780000	660000	1240000	840000	1180000	1540000	660000	800000	1180000
1019258878	0	1940000	100000	0	0	0	0	0	0	0	0	0	0	0	0	0	0	0	0	0	1120000	0	0	0	0	0	0	0	0	0	0	0	0	0	0	0	0	0
1032068843	0	0	1360000	2260000	740000	1900000	0	0	1320000	1160000	0	1700000	1800000	980000	0	1480000	540000	0	0	0	20000	1960000	40000	0	0	0	0	0	0	1260000	260000	1320000	1200000	2040000	2160000	820000	1280000	0
1261355	0	1380000	1440000	1360000	1580000	0	0	0	1700000	880000	980000	0	0	2160000	0	1500000	1520000	0	0	0	1540000	0	0	0	0	0	0	0	0	0	0	1560000	0	0	1740000	0	0	1080000
3372798	0	1420000	1380000	1240000	0	0	0	0	1300000	0	0	0	0	0	0	1500000	0	0	0	0	2040000	0	0	0	0	0	0	0	0	0	0	0	0	0	0	0	0	0
1029541292	320000	1280000	20000	0	1220000	0	0	0	0	20000	0	0	0	0	0	0	1300000	0	0	0	1820000	1220000	0	0	0	0	0	0	0	0	0	1660000	0	0	0	0	0	0
1029196641	0	2180000	1540000	1740000	1560000	1900000	720000	1140000	1480000	1320000	1440000	1700000	1860000	2240000	0	1140000	1480000	980000	960000	2240000	1460000	2360000	1320000	0	0	0	1840000	2240000	2080000	1360000	980000	1440000	1400000	1800000	2180000	1380000	1300000	1640000
1027209428	160000	920000	1440000	1660000	0	0	0	0	900000	0	0	0	0	80000	0	1000000	0	0	0	0	960000	0	0	0	0	0	0	0	0	0	0	0	0	0	0	0	0	0
1025848276	260000	1360000	1400000	120000	0	0	0	0	0	0	0	0	0	0	0	0	0	0	0	0	1540000	0	0	0	0	0	0	0	0	0	0	0	0	0	0	0	0	0
1031009571	0	1440000	1460000	2280000	1000000	0	0	0	1280000	1220000	1400000	0	0	2100000	0	1260000	0	0	0	0	1660000	0	0	0	0	0	0	0	0	0	0	1440000	0	0	60000	0	0	1640000
1017874524	220000	1260000	460000	0	0	0	0	0	0	0	0	0	0	0	0	0	0	0	0	0	1100000	0	0	0	0	0	0	0	200000	0	0	0	0	0	0	0	0	0
1030098691	160000	840000	1000000	1800000	840000	1360000	720000	920000	1460000	0	1020000	1280000	1320000	2020000	0	880000	980000	680000	780000	1580000	960000	1440000	780000	1440000	1520000	1580000	1660000	1640000	1800000	840000	760000	580000	860000	1260000	0	600000	700000	1400000
1030101379	0	1360000	1380000	2220000	1160000	0	0	0	1520000	1180000	0	0	0	2680000	0	1520000	0	0	0	0	1320000	0	0	0	0	0	0	0	0	0	0	1400000	0	0	2160000	0	0	0
1022227458	0	1200000	1480000	2180000	0	0	0	0	360000	0	1620000	0	0	3100000	0	1440000	0	0	0	0	1540000	0	0	0	0	0	0	0	0	0	0	0	0	0	0	0	0	380000
1028658791	260000	1280000	1200000	2460000	0	0	0	0	240000	0	0	0	0	0	0	1600000	0	0	0	0	1140000	0	0	0	0	0	0	0	0	0	0	0	0	0	0	0	0	0
1020933058	260000	1360000	1380000	2260000	0	0	0	0	1520000	0	0	0	0	0	0	2200000	0	0	0	0	1520000	0	0	0	0	0	0	0	0	0	0	0	0	0	0	0	0	0
9413635	160000	660000	220000	0	40000	0	20000	40000	40000	40000	20000	40000	40000	40000	0	0	0	20000	0	40000	1760000	140000	80000	0	1040000	0	1860000	2340000	2540000	0	0	0	60000	20000	0	20000	40000	0
8316032	160000	940000	920000	1700000	0	0	0	0	760000	0	0	0	0	0	0	1080000	0	0	0	0	1100000	0	0	0	0	0	0	0	0	0	0	0	0	0	0	0	0	0
1025962215	260000	1400000	1440000	2580000	1260000	2580000	1100000	1240000	1760000	1180000	1520000	1700000	2060000	2300000	2280000	1620000	1560000	1060000	1080000	1420000	1620000	2060000	1300000	2620000	1780000	2420000	1880000	2400000	2280000	1300000	1060000	80000	1280000	2020000	2540000	880000	1300000	2100000
1027657425	160000	1080000	1580000	1400000	0	0	0	0	0	0	0	0	0	0	0	60000	0	0	0	0	880000	0	0	0	0	0	0	0	0	0	0	0	0	0	0	0	0	0
1029130821	260000	1420000	1400000	2300000	980000	1420000	460000	760000	0	1240000	1180000	1320000	840000	1880000	1200000	360000	1200000	600000	640000	1280000	1560000	1400000	700000	1240000	1020000	1520000	780000	1400000	1280000	900000	740000	1220000	960000	1220000	1880000	760000	920000	1300000
11159961	180000	1320000	1200000	220000	0	0	0	0	0	0	0	0	0	0	0	0	0	0	0	0	1060000	0	0	0	0	0	0	0	0	0	0	0	0	0	0	0	0	0
1022898810	20000	1420000	1620000	2240000	0	0	0	0	1200000	0	0	0	0	0	0	1480000	0	0	0	0	1640000	0	0	0	0	0	0	0	0	0	0	0	0	0	0	0	0	0
1019012063	260000	1600000	1400000	2240000	1300000	0	0	0	0	1260000	1460000	0	0	2280000	0	560000	1500000	0	0	0	1560000	20000	0	0	0	0	0	0	0	0	0	1480000	0	0	2460000	0	0	1580000
1030279083	260000	1720000	680000	0	0	0	0	0	0	0	0	0	0	0	0	0	0	0	0	0	2040000	0	0	0	0	0	0	0	0	0	0	0	0	0	0	0	0	0
1030936803	0	1360000	1380000	2240000	0	0	0	0	20000	0	0	0	0	0	0	1480000	0	0	0	0	1500000	0	0	0	0	0	0	0	0	0	0	0	0	0	0	0	0	0
1018993712	260000	1500000	1640000	2380000	1260000	2060000	880000	1360000	1580000	1180000	1620000	1700000	1880000	2540000	2020000	1840000	1440000	40000	1020000	2700000	1600000	2040000	1480000	1860000	1720000	1340000	2020000	2680000	2260000	1600000	1060000	1520000	1320000	2340000	2240000	920000	1340000	1680000
1024194358	180000	40000	40000	40000	40000	40000	0	0	40000	40000	40000	60000	60000	40000	20000	40000	40000	20000	40000	0	140000	60000	40000	40000	0	40000	0	0	0	120000	40000	40000	40000	40000	40000	40000	40000	60000
1015810322	0	2340000	2560000	2340000	0	0	0	0	280000	0	0	0	0	440000	0	2100000	0	0	0	0	2740000	0	0	0	0	0	0	0	0	0	0	0	0	0	0	0	0	0
1028017415	0	1240000	1340000	0	1320000	0	0	0	380000	0	0	0	0	0	0	0	0	0	0	0	1360000	0	0	0	0	0	0	0	0	0	0	0	0	0	0	0	0	0
1029351275	220000	1360000	20000	0	0	0	0	0	0	0	0	0	0	0	0	0	0	0	0	0	1480000	0	0	0	0	0	0	0	0	0	0	0	0	0	0	0	0	0
1026603805	0	20000	680000	2340000	0	0	0	0	1760000	0	0	0	0	1440000	0	1520000	0	0	0	0	1020000	0	0	0	0	0	0	0	0	0	0	0	0	0	0	0	0	0
1027950461	260000	1360000	1380000	2260000	0	0	0	0	1540000	1220000	1480000	0	0	2480000	0	1480000	0	0	0	0	1520000	0	0	0	0	0	0	0	0	0	0	0	0	0	600000	0	0	1640000
1031515939	0	140000	580000	660000	0	0	0	0	0	0	0	0	0	0	0	200000	0	0	0	0	20000	0	0	0	0	0	0	0	0	0	0	0	0	0	0	0	0	0
1018867916	620000	1360000	1580000	3280000	2540000	5580000	2740000	3200000	920000	2760000	2960000	3860000	4820000	4980000	6480000	1580000	3520000	4320000	2700000	5760000	3620000	4680000	3160000	0	3100000	2840000	1660000	2300000	1940000	2880000	2740000	3220000	1140000	4220000	6820000	880000	3160000	2340000
1032828443	160000	0	400000	1060000	0	0	0	0	0	0	0	0	0	0	0	600000	0	0	0	0	0	0	0	0	0	0	0	0	0	0	0	0	0	0	0	0	0	0
1027939280	0	0	1580000	0	0	0	0	0	0	0	0	0	0	20000	0	1520000	0	0	0	0	20000	0	0	0	0	0	0	0	0	0	0	0	0	0	0	0	0	0
1018798458	300000	1440000	1380000	2260000	0	0	0	0	1520000	0	0	0	0	0	0	1480000	0	0	0	0	1540000	0	0	0	0	0	0	0	0	0	0	0	0	0	0	0	0	0
1775898	100000	560000	440000	680000	840000	1180000	580000	780000	0	680000	840000	1220000	1120000	1180000	0	440000	980000	720000	720000	1560000	840000	1260000	1100000	1280000	1080000	1620000	1040000	1240000	1500000	760000	620000	980000	740000	1420000	1340000	500000	980000	1200000
1020718925	260000	1600000	1420000	440000	0	0	0	0	0	0	0	0	0	0	0	0	0	0	0	0	1500000	0	0	0	0	0	0	0	0	0	0	0	0	0	0	0	0	0
1018728534	120000	360000	1320000	1640000	0	0	0	0	0	0	0	0	0	0	0	0	0	0	0	0	460000	0	0	0	0	0	0	0	0	0	0	0	0	0	0	0	0	0
3646367	0	1440000	1440000	2300000	0	0	0	0	1520000	0	1640000	0	0	2340000	0	1500000	0	0	0	0	160000	0	0	0	0	0	0	0	0	0	0	0	0	0	0	0	0	400000
11745762	140000	700000	700000	1160000	0	0	0	0	780000	0	40000	0	0	1140000	0	760000	0	0	0	0	760000	0	0	0	0	0	0	0	0	0	0	0	0	0	0	0	0	0
3764188	0	20000	60000	80000	0	0	0	0	40000	0	0	0	0	0	0	140000	0	0	0	0	100000	0	0	0	0	0	0	0	0	0	0	0	0	0	0	0	0	1260000
1016579945	140000	1380000	1580000	2460000	1360000	1040000	0	0	1920000	1260000	1540000	2020000	2000000	2420000	0	1480000	1880000	0	0	0	1540000	2160000	0	0	0	0	0	0	0	0	0	1560000	0	0	2340000	0	0	1760000
3833635	260000	1520000	1560000	2220000	0	0	0	0	40000	0	0	0	0	0	0	380000	0	0	0	0	1540000	0	0	0	0	0	0	0	0	0	0	0	0	0	0	0	0	0
1023569821	0	40000	1360000	2440000	0	0	0	0	1260000	1040000	1360000	0	0	1940000	0	1420000	0	0	0	0	60000	0	0	0	0	0	0	0	0	0	0	0	0	0	20000	0	0	1460000
1023573514	160000	1100000	1460000	2380000	0	0	0	0	1520000	0	0	0	0	160000	0	1420000	0	0	0	0	1720000	0	0	0	0	0	0	0	0	0	0	0	0	0	0	0	0	0
1015092449	0	1420000	460000	20000	0	0	0	0	0	0	0	0	0	0	0	0	0	0	0	0	1200000	0	0	0	0	0	0	0	0	0	0	0	0	0	0	0	0	0
1029405860	260000	700000	700000	1160000	640000	980000	400000	620000	780000	640000	820000	860000	960000	1200000	0	780000	740000	500000	540000	1120000	840000	1000000	600000	180000	880000	0	920000	1180000	1040000	660000	540000	720000	660000	1020000	1160000	440000	660000	800000
7275624	0	0	1360000	2340000	0	0	0	0	20000	0	0	0	0	0	0	1500000	0	0	0	0	40000	0	0	0	0	0	0	0	0	0	0	0	0	0	0	0	0	0
1020629502	140000	780000	800000	1260000	460000	960000	380000	620000	780000	540000	620000	860000	920000	880000	1060000	760000	700000	500000	540000	1040000	760000	980000	600000	1200000	1020000	1400000	1080000	1320000	1220000	660000	540000	500000	660000	1040000	820000	440000	660000	720000
12474582	200000	1520000	1380000	1200000	0	0	0	0	1920000	0	1440000	0	0	2320000	0	1600000	0	0	0	0	1600000	0	0	0	0	0	0	0	0	0	0	0	0	0	0	0	0	1440000
1029612217	140000	1300000	980000	1460000	0	0	0	0	0	0	0	0	0	0	0	20000	0	0	0	0	1400000	0	0	0	0	0	0	0	0	0	0	0	0	0	0	0	0	0
1025483804	260000	680000	940000	1480000	1020000	1740000	0	0	1360000	1180000	1020000	1380000	1800000	1600000	0	1000000	1260000	0	0	0	740000	2120000	0	0	0	0	0	0	0	0	0	1400000	0	0	2260000	0	20000	940000
10305000	260000	1400000	1380000	2300000	0	0	0	0	60000	0	1440000	0	0	2320000	0	1600000	0	0	0	0	1520000	0	0	0	0	0	0	0	0	0	0	0	0	0	0	0	0	1860000
1018022991	60000	1420000	1380000	2300000	1020000	1580000	0	0	1500000	820000	980000	1460000	1600000	1740000	0	1500000	1260000	0	0	0	1620000	1060000	0	0	0	0	0	0	0	1060000	0	1180000	380000	0	1540000	0	1060000	1120000
1018321072	360000	980000	960000	1680000	860000	1180000	400000	860000	1340000	20000	920000	1060000	1100000	1820000	1100000	1140000	1180000	800000	640000	1120000	920000	1100000	740000	1220000	1100000	1280000	0	80000	1220000	900000	700000	1200000	780000	1220000	0	500000	980000	1240000
1029635731	240000	1160000	920000	2400000	0	0	0	0	1560000	240000	1480000	0	0	2240000	0	1640000	0	0	0	0	1280000	0	0	0	0	0	0	0	0	0	0	60000	0	0	0	0	0	1640000
1029414800	240000	1380000	1460000	2260000	1240000	1940000	820000	1060000	1740000	1200000	1440000	1720000	1880000	2280000	2040000	1460000	1500000	1340000	1060000	2460000	1500000	2000000	1140000	2100000	1800000	2500000	1860000	260000	1360000	1020000	1060000	1400000	860000	2040000	2200000	820000	940000	1620000
1018303649	0	1360000	1400000	380000	0	0	0	0	0	0	0	0	0	0	0	0	0	0	0	0	1540000	0	0	0	0	0	0	0	0	0	0	0	0	0	0	0	0	0
1018300682	20000	1360000	1380000	2240000	1240000	0	0	0	1560000	3100000	1720000	0	0	2540000	0	1080000	1200000	0	0	0	1460000	20000	0	0	0	0	0	0	0	0	0	1400000	0	0	3880000	0	0	2520000
1668585	260000	1300000	1280000	2180000	0	0	0	0	240000	0	0	0	0	140000	0	1540000	0	0	0	0	1780000	0	0	0	0	0	0	0	0	0	0	0	0	0	0	0	0	0
1015049225	0	0	20000	1400000	0	0	0	0	0	0	0	0	0	0	0	20000	0	0	0	0	20000	0	0	0	0	0	0	0	0	0	0	0	0	0	0	0	0	0
1023585849	260000	1360000	1380000	2260000	0	0	0	0	1520000	0	0	0	0	2240000	0	1480000	0	0	0	0	1500000	0	0	0	0	0	0	0	0	0	0	0	0	0	0	0	0	0
1025483921	120000	1460000	1220000	20000	0	0	0	0	0	0	0	0	0	0	0	0	0	0	0	0	1480000	0	0	0	0	0	0	0	0	0	0	0	0	0	0	0	0	0
1030014541	0	1320000	20000	0	0	0	0	0	0	0	0	0	0	0	0	0	0	0	0	0	1200000	0	0	0	0	0	0	0	0	0	0	0	0	0	0	0	0	0
1022086596	0	1380000	1380000	2380000	0	0	0	0	0	0	0	0	0	0	0	0	0	0	0	0	1520000	0	0	0	0	0	0	0	0	0	0	0	0	0	0	0	0	0
1027764488	140000	1380000	1420000	2320000	860000	2220000	820000	1220000	1060000	1200000	1680000	1820000	1980000	3460000	2260000	1540000	1140000	980000	1040000	2260000	3340000	2060000	1160000	4220000	1320000	2440000	1060000	2320000	2040000	1100000	880000	1540000	760000	1400000	2280000	740000	1120000	1760000
1024411545	0	700000	700000	1140000	0	0	0	0	780000	600000	740000	0	0	1140000	0	760000	0	0	0	0	1360000	0	0	0	0	0	0	0	0	960000	0	0	860000	0	540000	100000	0	800000
1018231379	0	1360000	1380000	2260000	0	0	0	0	0	0	0	0	0	0	0	80000	0	0	0	0	1480000	0	0	0	0	0	0	0	0	0	0	0	0	0	0	0	0	0
1029660694	220000	1460000	1480000	2320000	520000	1280000	40000	980000	1900000	1080000	1020000	1140000	1280000	2000000	2860000	2060000	960000	740000	700000	340000	1540000	1860000	800000	1460000	1280000	1620000	1240000	2140000	1400000	880000	640000	1020000	900000	1380000	1820000	580000	1200000	1460000
1030227372	320000	2860000	980000	40000	0	0	0	0	0	0	0	0	0	0	0	500000	0	0	0	0	1800000	0	0	0	0	0	0	0	0	0	0	0	0	0	0	0	0	0
1027158098	260000	1540000	1360000	2760000	1240000	1920000	0	0	0	1000000	820000	3520000	4860000	1280000	0	780000	1480000	0	0	0	1520000	1940000	0	0	0	0	0	0	0	0	0	1180000	0	0	2020000	0	1140000	640000
8433025	20000	1740000	2000000	2400000	0	0	0	0	0	0	0	0	0	0	0	0	0	0	0	0	1440000	0	0	0	0	0	0	0	0	0	0	0	0	0	0	0	0	0
7733311	0	1420000	1380000	0	0	0	0	0	0	0	0	0	0	0	0	0	0	0	0	0	40000	0	0	0	0	0	0	0	0	0	0	0	0	0	0	0	0	0
1031892630	0	620000	960000	1040000	1000000	1560000	620000	160000	1660000	960000	1160000	1260000	1200000	2180000	20000	1560000	1200000	880000	840000	0	140000	1680000	940000	1700000	1380000	1940000	1580000	1920000	0	1080000	860000	1160000	940000	1580000	1740000	680000	1080000	1360000
4428140	0	920000	20000	0	0	0	0	0	0	0	0	0	0	0	0	0	0	0	0	0	1260000	0	0	0	0	0	0	0	0	0	0	0	0	0	0	0	0	0
1032577017	720000	5420000	4340000	4720000	0	0	0	0	3840000	2460000	2380000	0	0	30880000	0	4400000	0	0	0	0	7820000	0	0	0	0	0	0	0	0	0	0	0	0	0	0	0	0	3900000
2224009	0	700000	680000	1180000	0	0	0	0	780000	0	0	0	0	20000	0	760000	0	0	0	0	780000	0	0	0	0	0	0	0	0	0	0	0	0	0	0	0	0	0
1032748709	260000	1200000	1560000	20000	0	0	0	0	0	0	0	0	0	0	0	0	0	0	0	0	1500000	0	0	0	0	0	0	0	0	0	0	0	0	0	0	0	0	0
1031758929	240000	2620000	1380000	2060000	1220000	1920000	760000	1240000	0	0	0	1720000	1880000	0	2080000	20000	1480000	1040000	80000	2260000	1580000	1920000	0	1280000	1760000	2420000	1820000	4760000	460000	1300000	340000	40000	1280000	0	0	840000	1320000	0
1016437524	0	0	560000	1360000	840000	0	0	0	0	900000	0	0	0	0	0	120000	1020000	0	0	0	20000	0	0	0	0	0	0	0	0	860000	720000	1620000	860000	1420000	1760000	580000	860000	1040000
1343903	280000	1340000	1400000	2300000	0	0	0	0	0	0	0	0	0	1560000	0	40000	0	0	0	0	1500000	0	0	0	0	0	0	0	0	0	0	0	0	0	0	0	0	0
1028951296	60000	1580000	1520000	2540000	0	0	0	0	3300000	360000	1440000	0	0	2400000	0	1740000	0	0	0	0	1520000	0	0	0	0	0	0	0	0	0	0	0	0	0	20000	0	0	40000
1021764424	0	1420000	1500000	2560000	0	0	0	0	1740000	0	1520000	0	0	2480000	0	1740000	0	0	0	0	1800000	0	0	0	0	0	0	0	0	0	0	0	0	0	0	0	0	1620000
1022623546	0	1220000	560000	1960000	0	0	0	0	0	0	0	0	0	0	0	680000	0	0	0	0	240000	0	0	0	0	0	0	0	0	0	0	0	0	0	0	0	0	0
4509049	160000	1100000	1120000	1780000	0	1680000	0	0	20000	1000000	1160000	1440000	1660000	1660000	0	1160000	1200000	0	0	0	1080000	1600000	0	0	0	0	0	0	0	0	0	120000	0	0	1860000	0	120000	1300000
1028830465	320000	960000	1380000	2300000	0	0	0	0	1420000	0	1000000	0	0	1540000	0	980000	0	0	0	0	1540000	0	0	0	0	0	0	0	0	0	0	0	0	0	0	0	0	1180000
1028934103	0	540000	500000	1200000	0	0	0	0	0	0	0	0	0	0	0	120000	0	0	0	0	220000	0	0	0	0	0	0	0	0	0	0	0	0	0	0	0	0	0
4654495	120000	1360000	1420000	2300000	0	0	0	0	1000000	20000	1440000	0	0	2280000	0	1560000	0	0	0	0	1280000	0	0	0	0	0	0	0	0	0	0	0	0	0	0	0	0	1680000
1031301776	180000	1340000	1440000	3300000	0	0	0	0	420000	0	0	0	0	0	0	1540000	0	0	0	0	1560000	0	0	0	0	0	0	0	0	0	0	0	0	0	0	0	0	0
1020359005	0	1580000	640000	0	0	0	0	0	20000	0	0	0	0	0	0	0	0	0	0	0	1780000	0	0	0	0	0	0	0	0	0	0	0	0	0	0	0	0	0
1029773275	180000	1260000	1420000	2180000	0	0	0	0	1160000	0	0	0	0	0	0	1360000	0	0	0	0	1200000	0	0	0	0	0	0	0	0	0	0	0	0	0	0	0	0	0
1027241468	0	1800000	1020000	700000	1240000	1300000	0	0	1460000	840000	1020000	1140000	1300000	1740000	0	1400000	1480000	0	0	0	2200000	1360000	0	0	0	0	0	0	0	0	0	1360000	0	0	1500000	0	20000	1100000
1031278409	60000	1520000	1820000	1520000	0	0	0	0	0	0	0	0	0	0	0	0	0	0	0	0	1660000	0	0	0	0	0	0	0	0	0	0	0	0	0	0	0	0	0
1028446671	0	1360000	60000	0	0	0	0	0	0	0	0	0	0	0	0	0	0	0	0	0	0	0	0	0	0	0	0	0	0	0	0	0	0	0	0	0	0	0
1029790777	0	1440000	1520000	0	0	0	780000	200000	0	1100000	960000	0	0	1820000	0	0	0	980000	1040000	0	1060000	1960000	1140000	0	0	0	0	0	0	800000	900000	0	1120000	900000	480000	800000	80000	0
4875360	0	0	300000	0	0	0	0	0	0	0	0	0	0	0	0	0	0	0	0	0	20000	0	0	0	0	0	0	0	0	0	0	0	0	0	0	0	0	0
1017351155	240000	1360000	1380000	1160000	0	0	0	0	0	0	0	0	0	0	0	0	0	0	0	0	1500000	0	0	0	0	0	0	0	0	0	0	0	0	0	0	0	0	0
1029803334	200000	980000	1200000	1340000	680000	1140000	880000	2240000	800000	1000000	880000	1120000	1120000	1700000	0	860000	760000	1220000	1220000	2980000	1540000	760000	2020000	1260000	980000	440000	1200000	1300000	1420000	780000	600000	940000	960000	20000	1500000	520000	1020000	1040000
1028768795	200000	840000	1460000	1860000	0	0	0	0	660000	0	0	0	0	0	0	740000	0	0	0	0	1580000	0	0	0	0	0	0	0	0	0	0	0	0	0	0	0	0	0
1029829770	200000	1240000	1180000	780000	0	0	0	0	0	0	0	0	0	0	0	0	0	0	0	0	1260000	0	0	0	0	0	0	0	0	0	0	0	0	0	0	0	0	0
1022583808	260000	1420000	1380000	2260000	0	0	0	0	2660000	0	80000	0	0	2260000	0	1500000	0	0	0	0	1680000	0	0	0	0	0	0	0	0	0	0	0	0	0	0	0	0	0
1020068525	120000	1340000	1380000	0	0	0	0	0	0	0	0	0	0	0	0	0	0	0	0	0	1500000	0	0	0	0	0	0	0	0	0	0	0	0	0	0	0	0	0
1029145014	180000	1360000	1500000	2420000	0	0	0	0	1180000	840000	1160000	0	0	1620000	0	1420000	0	0	0	0	1540000	0	0	0	0	0	0	0	0	0	0	40000	0	0	1440000	0	0	1300000
1029013795	0	1480000	20000	0	0	0	0	0	0	0	0	0	0	0	0	0	0	0	0	0	1660000	0	0	0	0	0	0	0	0	0	0	0	0	0	0	0	0	0
5170709	280000	20000	580000	1480000	0	1960000	0	0	700000	1140000	1440000	0	0	2300000	0	1020000	0	0	0	0	1100000	20000	0	0	0	0	0	0	0	0	0	680000	0	0	320000	0	80000	1520000
1021538597	0	0	220000	80000	0	0	0	0	0	0	0	0	0	0	0	0	0	0	0	0	20000	0	0	0	0	0	0	0	0	0	0	0	0	0	0	0	0	0
1031953346	0	1200000	1060000	1080000	0	0	0	0	0	0	0	0	0	0	0	0	0	0	0	0	1320000	0	0	0	0	0	0	0	0	0	840000	0	0	20000	0	100000	40000	0
9450511	260000	1520000	1400000	0	0	0	0	0	0	0	0	0	0	0	0	0	0	0	0	0	1600000	0	0	0	0	0	0	0	0	0	0	0	0	0	0	0	0	0
791860	260000	980000	1140000	1860000	1020000	1380000	500000	840000	1320000	800000	980000	1260000	1360000	1460000	1480000	1460000	1220000	660000	720000	960000	1160000	1460000	920000	1680000	1280000	1780000	1320000	1780000	1520000	1120000	740000	1180000	1060000	1400000	1720000	620000	1080000	1060000
1028361558	220000	1500000	1400000	1880000	1240000	1960000	860000	1240000	1260000	1240000	1100000	1680000	1960000	1740000	1560000	1120000	1580000	980000	1040000	1500000	1280000	1840000	1160000	20000	0	220000	0	1360000	1320000	1300000	1060000	1420000	1280000	3180000	1880000	840000	1280000	1460000
1028340966	0	1460000	1400000	2320000	1780000	1880000	240000	60000	1460000	1360000	1160000	1420000	1540000	1960000	0	1840000	1640000	600000	700000	1000000	1600000	1820000	880000	0	0	0	0	320000	980000	960000	780000	1240000	1060000	1940000	3300000	780000	1060000	700000
1029881343	80000	880000	840000	1420000	660000	1180000	480000	940000	1160000	920000	840000	1100000	1420000	1380000	1400000	1220000	880000	600000	640000	1280000	940000	1380000	700000	1360000	1060000	1560000	1120000	1720000	1560000	760000	680000	780000	880000	1220000	1420000	520000	840000	900000
1028913643	0	360000	1340000	1980000	0	0	0	0	1100000	0	1000000	0	0	1560000	0	1200000	0	0	0	0	40000	0	0	0	0	0	0	0	0	0	0	0	0	0	0	0	0	0
1025785489	180000	660000	500000	1920000	1240000	0	0	0	1200000	1160000	0	0	0	540000	0	1140000	1480000	0	0	0	1000000	20000	0	0	0	0	0	0	0	0	0	1400000	0	0	2160000	0	0	660000
1019938288	300000	1420000	1700000	2340000	1500000	0	0	0	2040000	1180000	1560000	1840000	1560000	2640000	0	1860000	1540000	0	0	0	1660000	2240000	0	0	0	0	0	0	0	0	0	2320000	0	0	4480000	0	0	2400000
8138658	100000	1200000	1060000	1720000	940000	0	0	0	1700000	940000	900000	0	0	1920000	0	1480000	1120000	0	0	0	1680000	0	0	0	0	0	0	0	0	0	0	1000000	0	0	1640000	0	0	1380000
1028316273	0	1420000	1400000	2300000	0	0	0	0	0	0	0	0	0	0	0	120000	0	0	0	0	1520000	0	0	0	0	0	0	0	0	0	0	0	0	0	20000	0	0	1640000
9757913	200000	920000	1000000	1620000	0	0	0	0	1440000	0	0	0	0	20000	0	1500000	0	0	0	0	1000000	0	0	0	0	0	0	0	0	0	0	0	0	0	0	0	0	0
1017570187	0	2000000	1240000	0	0	0	0	0	0	0	0	0	0	0	0	0	0	0	0	0	60000	0	0	0	0	0	0	0	0	0	0	0	0	0	0	0	0	0
5315809	1000000	1800000	1680000	4120000	1200000	40000	0	0	2660000	2700000	1940000	1160000	80000	3840000	0	2760000	2200000	0	0	0	2660000	3380000	0	0	0	0	0	0	0	40000	20000	2940000	40000	40000	2500000	40000	80000	3080000
1025576870	260000	1420000	1420000	2280000	0	0	0	0	0	0	0	0	0	0	0	40000	0	0	0	0	1720000	0	0	0	0	0	0	0	0	0	0	0	0	0	0	0	0	0
1029920826	260000	1400000	1460000	2220000	160000	700000	0	0	700000	1180000	1100000	1680000	1880000	2180000	0	40000	1560000	0	0	0	1180000	1960000	0	0	0	0	0	0	0	0	0	1420000	0	0	2160000	0	0	0
1015283122	160000	1440000	1320000	2240000	80000	0	0	20000	0	1180000	1520000	0	0	2340000	0	780000	0	0	0	0	1120000	0	0	0	0	0	0	0	0	0	0	1380000	0	0	2200000	0	0	1720000
1017671266	220000	1500000	160000	0	0	0	0	0	20000	0	0	0	0	0	0	0	0	0	0	0	1540000	0	0	0	0	0	0	0	0	0	0	0	0	0	0	0	0	0
1031128782	260000	1340000	1380000	2300000	1240000	1580000	780000	1740000	1540000	1700000	1440000	1680000	1880000	2280000	1920000	1480000	1520000	1000000	1040000	2040000	1500000	1980000	1100000	2120000	1720000	2500000	1800000	2340000	2000000	1260000	960000	1420000	1260000	1720000	2160000	860000	1380000	1580000
1028732099	280000	2060000	1920000	2240000	0	0	0	0	0	0	0	0	0	0	0	1360000	0	0	0	0	1580000	0	0	0	0	0	0	0	0	0	0	0	0	0	0	0	0	0
1025823640	0	1620000	1540000	600000	0	0	0	0	0	0	0	0	0	0	0	0	0	0	0	0	1660000	0	0	0	0	0	0	0	0	0	0	0	0	0	0	0	0	0
3013039	0	1420000	1380000	2420000	1240000	1960000	0	0	1480000	1160000	1480000	1220000	940000	1500000	0	1160000	1460000	0	0	0	1520000	940000	0	0	0	0	0	0	0	0	0	1620000	0	0	2620000	0	40000	1680000
1015734620	0	1120000	1160000	1440000	0	0	780000	1740000	1200000	420000	1180000	0	0	1820000	3440000	1260000	0	680000	560000	2860000	920000	0	620000	1860000	1060000	2780000	1840000	560000	1260000	0	0	0	0	0	0	0	0	1240000
1021313031	260000	1400000	1380000	1300000	0	0	0	0	0	0	0	0	0	0	0	0	0	0	0	0	1500000	0	0	0	0	0	0	0	0	0	0	0	0	0	0	0	0	0
1029977769	260000	1280000	480000	1240000	0	0	0	0	200000	0	0	0	0	0	0	1420000	0	0	0	0	1760000	0	0	0	0	0	0	0	0	0	0	0	0	0	0	0	0	0
1029279207	140000	2820000	1540000	2240000	0	0	0	0	0	0	0	0	0	0	0	880000	0	0	0	0	2640000	0	0	0	0	0	0	0	0	0	0	0	0	0	0	0	0	0
1019658401	160000	3900000	1380000	2240000	0	1920000	780000	1200000	1520000	40000	0	1680000	1880000	1200000	0	540000	0	980000	780000	2220000	760000	1960000	0	0	0	0	0	140000	2060000	0	0	0	0	0	0	0	860000	0
1019657408	280000	1380000	1380000	2280000	0	0	0	0	1540000	0	0	0	0	20000	0	1480000	0	0	0	0	1500000	0	0	0	0	0	0	0	0	0	0	0	0	0	0	0	0	0
5522058	0	1360000	1360000	1560000	0	0	0	0	1240000	0	60000	0	0	2300000	0	1200000	0	0	0	0	1360000	0	0	0	0	0	0	0	0	0	0	0	0	0	0	0	0	0
1030555859	0	1400000	1380000	2260000	0	0	0	0	1740000	0	40000	0	0	100000	0	1500000	0	0	0	0	0	0	0	0	0	0	0	0	0	0	0	0	0	0	0	0	0	0
1029097003	320000	1500000	1560000	300000	0	0	0	0	0	0	0	0	0	0	0	0	0	0	0	0	1960000	0	0	0	0	0	0	0	0	0	0	0	0	0	0	0	0	0
1030011274	260000	1000000	1120000	1820000	0	0	0	0	1740000	0	1200000	0	0	2140000	0	2520000	0	0	0	0	1220000	0	0	0	0	0	0	0	0	0	0	0	0	0	0	0	0	20000
1029475682	180000	1000000	760000	1360000	0	0	0	0	20000	0	0	0	0	0	0	800000	0	0	0	0	980000	0	0	0	0	0	0	0	0	0	0	0	0	0	0	0	0	0
1029488798	260000	1380000	1380000	740000	0	0	0	0	0	0	0	0	0	0	0	0	0	0	0	0	1500000	0	0	0	0	0	0	0	0	0	0	0	0	0	0	0	0	0
4832418	40000	1080000	360000	0	0	0	0	0	0	0	0	0	0	0	0	0	0	0	0	0	1380000	0	0	0	0	0	0	0	0	0	0	0	0	0	0	0	0	0
1029492953	0	0	720000	1380000	0	0	0	0	0	40000	0	0	0	1100000	0	20000	0	0	0	0	0	0	0	0	0	0	0	0	0	0	0	0	0	0	0	0	0	0
1029535052	360000	140000	1880000	4600000	2480000	780000	800000	1140000	2360000	1160000	2020000	1540000	1880000	2040000	0	1020000	2940000	1040000	1040000	2220000	1400000	3840000	1180000	0	80000	0	1660000	980000	1480000	1160000	2100000	2820000	1220000	1960000	1820000	800000	1160000	2940000
1028709740	0	640000	420000	0	0	0	0	0	0	0	0	0	0	0	0	0	0	0	0	0	0	0	0	0	0	0	0	0	0	0	0	0	0	0	0	0	0	0
1029542771	140000	2260000	1380000	4340000	0	3880000	2000000	2780000	1820000	1160000	2240000	1840000	2020000	2280000	4160000	2840000	0	1940000	2060000	4180000	1880000	1980000	2300000	2340000	2860000	2400000	3360000	4180000	3620000	1300000	3240000	320000	2000000	5380000	2160000	1700000	940000	2100000
1028615357	40000	0	20000	0	0	0	0	0	0	0	0	0	0	0	0	0	0	0	0	0	200000	0	0	0	0	0	0	0	0	0	0	0	0	0	0	0	0	0
1029556271	260000	1360000	1480000	2320000	1340000	1960000	820000	1240000	1620000	1180000	1460000	1720000	1920000	2320000	0	1440000	1680000	1020000	1040000	2260000	1680000	2060000	1200000	0	0	0	0	0	0	1340000	1100000	1440000	1300000	2160000	2240000	860000	1320000	1640000
3198757	220000	1480000	820000	0	0	0	0	0	0	0	0	0	0	0	0	0	0	0	0	0	1580000	0	0	0	0	0	0	0	0	0	0	0	0	0	0	0	0	0
3187081	260000	0	20000	2240000	1260000	2020000	300000	0	1520000	740000	0	1700000	1920000	20000	0	1520000	1500000	20000	20000	0	80000	2000000	0	0	2940000	0	1760000	420000	2120000	1300000	1120000	1400000	1280000	1780000	2160000	1060000	1480000	1420000
1029568922	260000	1460000	1440000	2420000	0	0	0	0	1520000	0	0	0	0	280000	0	1500000	0	0	0	0	1580000	0	0	0	0	0	0	0	0	0	0	0	0	0	0	0	0	0
1028439735	0	2680000	1800000	320000	1840000	0	0	0	3300000	2080000	1620000	0	0	2740000	0	1900000	2680000	0	0	0	1220000	0	0	0	0	0	0	0	0	0	0	1560000	0	0	2380000	0	0	1780000
1029580487	280000	1400000	1860000	1260000	1840000	2980000	1440000	1400000	0	1720000	2140000	2600000	2800000	2800000	2820000	0	2200000	2000000	1760000	720000	1500000	3000000	1920000	2580000	1920000	2520000	1880000	2200000	1820000	820000	960000	2220000	1280000	2300000	3800000	800000	1200000	2260000
1029593768	120000	180000	1260000	1600000	0	0	0	0	0	0	0	0	0	1480000	0	480000	0	0	0	0	0	0	0	0	0	0	0	0	0	0	0	0	0	0	0	0	0	0
1028339763	0	1500000	1380000	2240000	0	0	0	0	480000	0	0	0	0	0	0	960000	0	0	0	0	1580000	0	0	0	0	0	0	0	0	0	0	0	0	0	0	0	0	0
1028306367	240000	1360000	1400000	260000	0	0	0	0	0	0	0	0	0	0	0	0	0	0	0	0	860000	0	0	0	0	0	0	0	0	0	0	0	0	0	0	0	0	0
1028235337	80000	1660000	960000	0	1280000	2260000	700000	840000	0	1180000	1440000	1700000	2040000	3160000	0	0	1440000	980000	520000	2160000	1320000	2380000	0	0	0	0	0	0	0	0	0	1380000	0	0	2880000	0	20000	1620000
1028106013	40000	900000	1000000	1520000	0	0	0	0	780000	0	0	0	0	0	0	940000	0	0	0	0	840000	0	0	0	0	0	0	0	0	0	0	0	0	0	0	0	0	0
1028086735	40000	1560000	1520000	1020000	3000000	0	0	0	1960000	1860000	2260000	0	0	4320000	0	340000	3260000	0	0	0	160000	540000	0	0	0	0	0	0	0	0	0	3140000	0	0	3460000	0	0	1920000
1029687850	180000	620000	580000	1760000	0	0	0	0	1520000	0	0	0	0	0	0	1340000	0	0	0	0	940000	0	0	0	0	0	0	0	0	0	0	0	0	0	0	0	0	0
1029690829	360000	1420000	1380000	140000	0	0	0	0	0	0	0	0	0	0	0	0	0	0	0	0	1700000	0	0	0	0	0	0	0	0	0	0	0	0	0	0	0	0	0
1029701509	320000	1660000	1460000	2220000	760000	1360000	0	0	1640000	680000	1660000	1380000	1340000	2500000	40000	1300000	900000	0	0	0	1660000	1360000	0	20000	0	40000	0	0	0	340000	0	820000	0	0	1240000	0	760000	1600000
1029723934	20000	1620000	2140000	2720000	0	0	0	0	980000	0	0	0	0	0	0	2520000	0	0	0	0	1620000	0	0	0	0	0	0	0	0	0	0	0	0	0	0	0	0	0
1027884080	80000	680000	1420000	2720000	1260000	1980000	0	0	1280000	1140000	700000	1700000	1880000	2360000	0	1180000	1540000	0	0	0	1660000	0	0	0	0	0	0	0	0	0	0	1160000	0	0	2000000	400000	20000	0
2830223	200000	1400000	1480000	1320000	840000	2100000	840000	1180000	1500000	1200000	1440000	1700000	1980000	1960000	0	780000	1520000	900000	1020000	2460000	1500000	2020000	1100000	0	0	0	0	0	2500000	1340000	1080000	1200000	1280000	40000	1840000	960000	1320000	1600000
1027767767	20000	20000	20000	20000	1020000	1720000	800000	1220000	40000	920000	1300000	1400000	1520000	1540000	0	40000	540000	1020000	1080000	1340000	0	1620000	1180000	980000	1720000	0	1820000	2340000	2040000	1360000	1020000	1260000	1400000	2000000	1740000	840000	1280000	1080000
1029790792	0	1200000	1140000	2680000	1300000	540000	0	0	0	1140000	0	1140000	1780000	0	20000	40000	1460000	0	0	0	1200000	1780000	0	0	0	0	0	0	0	1040000	1100000	1520000	340000	40000	2160000	920000	1260000	0
1027754585	0	2360000	1460000	2500000	820000	0	0	0	0	0	0	0	0	0	0	0	0	0	0	0	1300000	0	0	0	0	0	0	0	0	0	0	1920000	0	0	2540000	0	0	0
1032655587	260000	1360000	540000	0	0	0	0	0	0	0	0	0	0	0	0	0	0	0	0	0	1500000	0	0	0	0	0	0	0	0	0	0	0	0	0	0	0	0	0
1029839796	0	1240000	1280000	40000	0	0	0	0	0	0	0	0	0	0	0	0	0	0	0	0	1560000	0	0	0	0	0	0	0	0	0	0	0	0	0	0	0	0	0
1027635330	0	1380000	1340000	2200000	0	0	0	0	1580000	1360000	1460000	0	0	2500000	0	1500000	0	0	0	0	1560000	0	0	0	0	0	0	0	0	0	0	0	0	0	280000	0	0	1560000
1014639813	0	1520000	1440000	2320000	640000	1380000	640000	1460000	120000	1220000	640000	1320000	2520000	1120000	1640000	1480000	720000	680000	620000	120000	460000	1500000	820000	0	1480000	1960000	1740000	1740000	2380000	60000	0	820000	0	0	1400000	0	900000	1080000
1016257110	140000	1380000	1980000	2600000	0	0	0	0	1960000	1240000	2140000	0	0	4420000	0	1860000	0	0	0	0	1800000	0	0	0	0	0	0	0	0	0	0	0	0	0	380000	0	0	1680000
1029880626	0	960000	700000	300000	0	0	0	0	1780000	1260000	860000	0	0	2260000	0	620000	0	0	0	0	860000	0	0	0	0	0	0	0	0	0	0	0	0	0	1020000	0	0	960000
1029880710	280000	800000	800000	2320000	420000	2680000	0	0	1200000	1140000	620000	1420000	1680000	1000000	0	1600000	1540000	280000	1040000	0	1040000	1940000	1260000	0	0	0	0	0	0	1160000	380000	1520000	300000	800000	1460000	160000	1100000	1080000
1032690252	40000	700000	1320000	4480000	0	0	0	0	0	0	0	0	0	0	0	1460000	0	0	0	0	800000	0	0	3340000	1720000	0	1820000	1240000	0	0	0	0	0	0	0	0	0	0
1027532370	0	920000	920000	1540000	620000	1980000	620000	1000000	1020000	760000	980000	1740000	1880000	2020000	0	1000000	720000	800000	860000	520000	1040000	2020000	1260000	0	0	0	0	0	0	1060000	900000	800000	1100000	1600000	1180000	740000	1040000	1120000
1029917973	260000	1360000	20000	0	1320000	2500000	0	0	0	1280000	1060000	1820000	2100000	1640000	0	0	1560000	1120000	1060000	0	1500000	2100000	1160000	0	0	0	0	0	0	1300000	1120000	1540000	1440000	2100000	2320000	1080000	1580000	2400000
1029920067	80000	1360000	680000	0	0	0	0	0	0	0	0	0	0	0	0	0	0	0	0	0	1600000	0	0	0	0	0	0	0	0	0	0	0	0	0	0	0	0	0
1029928665	0	940000	980000	1580000	0	0	0	0	1560000	0	1220000	0	0	1700000	0	1320000	0	0	0	0	0	0	0	0	0	0	0	0	0	0	0	0	0	0	0	0	0	1140000
2613237	60000	1260000	1400000	2120000	0	0	0	0	0	0	1460000	0	0	2520000	0	20000	0	0	0	0	1260000	0	0	0	0	0	0	0	0	0	0	0	0	0	0	0	0	1620000
1027371757	160000	1300000	1020000	520000	0	0	0	0	1460000	0	0	0	0	320000	0	0	0	0	0	0	1280000	0	0	0	0	0	0	0	0	0	0	0	0	0	0	0	0	0
1029987912	160000	80000	40000	0	0	0	0	0	0	0	0	0	0	20000	0	0	0	0	0	0	460000	0	0	0	0	0	0	0	0	0	0	0	0	0	0	0	0	0
1014810162	0	1420000	1420000	2400000	2280000	1940000	40000	0	1580000	1200000	1280000	0	0	1960000	2220000	1660000	1480000	1020000	1080000	1360000	1660000	360000	1160000	2100000	1840000	2540000	2120000	40000	340000	1320000	1120000	1500000	1320000	2180000	2180000	1060000	1420000	1440000
1027362061	160000	940000	840000	1200000	640000	0	320000	60000	820000	680000	820000	40000	0	1380000	0	900000	780000	280000	0	0	940000	1140000	0	0	0	0	0	0	0	0	0	780000	0	0	1120000	0	40000	980000
1027269005	180000	60000	100000	120000	0	0	0	0	400000	0	0	0	0	0	0	80000	0	0	0	0	260000	0	0	0	0	0	0	0	0	0	0	0	0	0	0	0	0	0
1030100812	0	1100000	1040000	1660000	1040000	1080000	500000	740000	1280000	1920000	1020000	0	0	1760000	0	1420000	340000	560000	740000	1240000	1160000	1100000	440000	0	160000	0	1640000	1620000	1580000	860000	740000	1480000	820000	1440000	3020000	560000	860000	1500000
1030113883	0	1480000	1460000	2320000	1080000	2060000	0	0	1020000	820000	1400000	1600000	1940000	1800000	0	1480000	1480000	0	0	0	1520000	1780000	0	0	0	0	0	0	0	0	0	1220000	0	0	2140000	0	480000	1420000
1027213121	0	1400000	1500000	2620000	0	0	0	0	40000	0	0	0	0	0	0	440000	0	0	0	0	1200000	0	0	0	0	0	0	0	0	0	0	0	0	0	0	0	0	0
5825006	180000	1340000	1380000	2140000	0	0	0	0	0	0	0	0	0	0	0	0	0	0	0	0	1460000	0	0	0	0	0	0	0	0	0	0	0	0	0	0	0	0	0
2132453	80000	1040000	1040000	1560000	0	0	0	0	800000	0	320000	0	0	1940000	0	1120000	0	0	0	0	1160000	0	0	0	0	0	0	0	0	0	0	0	0	0	0	0	0	0
1027141637	0	2240000	2780000	2380000	20000	0	0	0	1080000	1400000	1260000	1380000	960000	1940000	0	1240000	0	0	0	0	1220000	1740000	0	0	0	0	0	0	0	0	0	1140000	0	0	1540000	0	0	1360000
5888414	0	1960000	1420000	1440000	1300000	0	0	0	0	660000	0	40000	0	0	0	0	620000	0	0	0	20000	0	0	0	0	0	0	0	0	0	0	1220000	0	0	0	0	0	160000
1030158723	280000	980000	960000	2060000	1400000	2020000	0	0	1820000	1180000	1540000	1740000	1880000	2340000	0	1800000	1560000	0	0	0	1340000	1780000	120000	0	0	0	0	0	0	1320000	1100000	1420000	1240000	1920000	2160000	840000	1380000	0
9659184	0	1440000	1380000	400000	0	0	0	0	0	1160000	1420000	0	0	1920000	0	0	0	0	0	0	1500000	0	0	0	0	0	0	0	0	0	0	720000	0	0	2160000	0	0	1660000
1030175865	0	240000	740000	1140000	0	0	0	0	0	0	0	0	0	0	0	120000	0	0	0	0	0	0	0	0	0	0	0	0	0	0	0	0	0	0	0	0	0	0
10956153	0	1340000	480000	0	0	0	0	0	0	0	0	0	0	0	0	0	0	0	0	0	700000	0	0	0	0	0	0	0	0	0	0	0	0	0	0	0	0	0
1014548605	0	220000	1360000	2240000	0	0	0	0	1520000	0	0	0	0	1060000	0	1480000	0	0	0	0	0	0	0	0	0	0	0	0	0	0	0	0	0	0	0	0	0	0
1027023467	0	1680000	2260000	2300000	1260000	0	0	0	1720000	1380000	1440000	140000	0	2240000	0	1580000	1480000	0	0	0	1520000	2000000	0	0	0	0	0	0	0	0	0	1720000	0	0	2440000	0	0	1580000
1026798252	180000	1380000	1720000	2460000	840000	20000	0	0	340000	1100000	760000	1860000	1840000	900000	0	1320000	1000000	0	0	0	1300000	1500000	0	0	0	0	0	0	0	0	0	940000	0	0	1500000	0	0	1360000
9661077	140000	460000	580000	1020000	0	940000	240000	80000	740000	0	0	1000000	960000	60000	1780000	660000	0	160000	460000	80000	840000	1060000	480000	200000	0	2440000	0	0	140000	680000	580000	0	680000	1120000	0	460000	680000	0
640615	200000	1180000	180000	500000	0	0	0	0	1520000	0	0	0	0	1800000	0	1360000	0	0	0	0	1500000	0	0	0	0	0	0	0	0	0	0	0	0	0	0	0	0	0
1026436121	40000	360000	1880000	2640000	0	0	0	0	0	1300000	1660000	0	0	2660000	0	100000	500000	0	0	0	60000	0	220000	0	0	0	380000	1120000	0	0	0	80000	0	40000	1340000	0	0	240000
1026397439	260000	1340000	1400000	2220000	0	0	0	0	0	0	0	0	0	0	0	1480000	0	0	0	0	1500000	0	0	0	0	0	0	0	0	0	0	0	0	0	0	0	0	0
1026123483	200000	1360000	1360000	1580000	0	0	0	0	1500000	0	0	0	0	1160000	0	1520000	0	0	0	0	1480000	0	0	0	0	0	0	0	0	0	0	0	0	0	0	0	0	0
1025693941	140000	1340000	1160000	2080000	0	0	0	0	1160000	1160000	880000	0	0	2260000	0	1160000	0	0	0	0	1420000	0	0	0	0	0	0	0	0	0	0	20000	0	0	2180000	0	0	1340000
1025396079	180000	700000	720000	1160000	600000	0	0	0	900000	620000	20000	0	0	1220000	0	760000	740000	0	0	0	820000	0	0	0	0	0	0	0	0	0	0	620000	0	0	860000	0	0	0
1030242804	0	40000	1020000	1600000	0	0	0	0	0	0	0	0	0	0	0	120000	0	0	0	0	0	0	0	0	0	0	0	0	0	0	0	0	0	0	0	0	0	0
1030250100	0	1720000	3040000	2560000	1280000	2040000	840000	820000	1780000	1260000	1960000	1120000	1880000	3080000	0	2640000	1480000	1260000	1280000	0	1500000	2000000	1040000	0	0	0	0	0	0	1380000	1060000	1540000	1380000	1800000	2280000	880000	1420000	1920000
1030291839	0	1260000	940000	1960000	660000	1920000	60000	0	1100000	400000	1320000	680000	1360000	2700000	0	20000	780000	940000	680000	0	120000	1000000	1120000	1220000	0	0	0	0	0	1180000	880000	860000	1260000	320000	1340000	840000	1320000	1400000
1025116525	40000	1340000	820000	2320000	0	0	0	0	0	0	0	0	0	0	0	60000	0	0	0	0	1540000	0	0	0	0	0	0	0	0	0	0	0	0	0	0	0	0	0
6954754	240000	2640000	1760000	3420000	0	0	0	0	2740000	0	0	0	0	0	0	2060000	0	0	0	0	2380000	0	0	0	0	0	0	0	0	0	0	0	0	0	0	0	0	0
1024976719	0	1480000	1180000	2320000	0	0	0	0	0	0	0	0	0	0	0	300000	0	0	0	0	1420000	0	0	0	0	0	0	0	0	0	0	0	0	0	0	0	0	0
1024949632	0	680000	1260000	0	0	0	0	0	0	0	400000	0	0	1660000	0	0	0	0	0	0	500000	0	0	0	0	0	0	0	0	0	0	0	0	0	0	0	0	1580000
1030329174	0	1440000	1380000	2260000	0	0	0	0	0	0	0	0	0	0	0	1200000	0	0	0	0	20000	0	0	0	0	0	0	0	0	0	0	0	0	0	0	0	0	0
1735077	160000	1280000	880000	680000	0	0	0	0	0	0	0	0	0	0	0	0	0	0	0	0	400000	0	0	0	0	0	0	0	0	0	0	0	0	0	0	0	0	0
1681479	0	760000	920000	1520000	0	0	0	0	660000	0	740000	0	0	1560000	0	1000000	0	0	0	0	760000	0	0	0	0	0	0	0	0	0	0	0	0	0	0	0	0	260000
1030381617	0	1380000	660000	3120000	0	0	0	0	40000	40000	0	0	0	0	0	140000	0	0	0	0	1320000	0	0	0	0	0	0	0	0	0	0	0	0	0	0	0	0	0
1030383024	0	1360000	1400000	2180000	1260000	0	0	0	600000	1200000	1180000	0	0	1740000	0	1460000	940000	0	0	0	660000	0	0	0	0	0	0	0	0	0	0	1420000	0	0	2320000	0	0	1580000
1030389606	200000	940000	1140000	300000	0	0	0	0	0	0	0	0	0	0	0	0	0	0	0	0	1140000	0	0	0	0	0	0	0	0	0	0	0	0	0	0	0	0	0
1024688519	260000	1440000	1420000	2280000	1160000	1900000	0	0	1500000	1160000	1160000	1720000	1880000	2240000	0	1480000	1480000	0	0	0	1500000	2060000	0	0	0	0	0	0	0	0	0	1420000	0	0	2040000	0	0	1600000
1602090	0	1000000	1000000	1380000	0	0	0	0	1220000	0	0	0	0	20000	0	1300000	0	0	0	0	900000	0	0	0	0	0	0	0	0	0	0	0	0	0	0	0	0	0
1024616909	0	0	1160000	1800000	520000	1280000	520000	820000	1220000	780000	920000	1140000	1040000	1520000	6500000	1280000	960000	660000	820000	1380000	0	920000	1780000	12900000	1380000	37520000	1460000	12520000	3040000	860000	720000	800000	740000	1280000	1460000	560000	880000	1060000
1024596966	220000	700000	700000	1140000	660000	1020000	480000	620000	1180000	660000	860000	880000	1000000	1160000	0	840000	780000	500000	540000	1140000	760000	1220000	600000	0	0	0	0	0	20000	820000	540000	900000	760000	1020000	1160000	440000	700000	840000
1368859	0	0	40000	0	0	0	0	0	0	0	0	0	0	0	0	0	0	0	0	0	0	0	0	0	0	0	0	0	0	0	0	0	0	0	0	0	0	0
7410950	260000	1520000	1460000	60000	0	0	0	0	1840000	0	1500000	0	0	2440000	0	2040000	0	0	0	0	1660000	0	0	0	0	0	0	0	0	0	0	0	0	0	0	0	0	0
744274	0	0	1320000	2240000	0	0	0	0	1840000	0	0	0	0	20000	0	3060000	0	0	0	0	0	0	0	0	0	0	0	0	0	0	0	0	0	0	0	0	0	0
12959107	260000	1360000	1300000	1860000	1220000	1980000	680000	1200000	1240000	1140000	0	1700000	1880000	2060000	2040000	1280000	1480000	580000	1020000	2240000	1400000	1980000	1140000	2100000	1800000	2280000	1800000	2080000	2000000	1300000	1060000	1400000	1300000	1720000	2180000	840000	1280000	1040000
1015881017	280000	720000	1400000	2260000	0	1900000	0	0	1540000	0	0	560000	0	0	2960000	1980000	0	0	0	0	120000	280000	20000	0	1700000	0	1820000	2380000	720000	80000	0	0	460000	1320000	0	0	0	1300000
1015785173	120000	1060000	700000	0	0	0	0	0	0	0	0	0	0	0	0	0	0	0	0	0	900000	0	0	0	0	0	0	0	0	0	0	0	0	0	0	0	0	0
1024386370	240000	1380000	1400000	2620000	1000000	1860000	560000	980000	1440000	860000	1060000	1060000	1240000	1780000	0	1380000	1040000	660000	720000	1880000	1540000	1520000	860000	1300000	1140000	460000	2280000	1840000	1660000	940000	880000	1020000	760000	1760000	1520000	580000	1740000	1340000
1024296835	200000	1100000	340000	0	0	0	0	0	0	0	0	0	0	0	0	0	0	0	0	0	1200000	0	0	0	0	0	0	0	0	0	0	0	0	0	0	0	0	0
1024261624	160000	920000	1020000	1800000	1040000	1340000	460000	900000	880000	1140000	1060000	1380000	1360000	1640000	1760000	1100000	380000	540000	520000	1460000	1140000	1880000	640000	1480000	940000	1440000	1480000	2120000	1560000	880000	520000	1480000	880000	1160000	1820000	640000	780000	1200000
1024199800	260000	1480000	1380000	2500000	1240000	2080000	800000	1160000	1480000	1160000	1580000	1720000	2040000	2340000	2260000	1500000	1380000	800000	600000	1900000	1660000	2100000	980000	2100000	1720000	2600000	20000	1680000	1980000	1300000	1060000	1460000	1320000	2160000	2360000	1000000	1420000	1620000
1023935528	0	1480000	1220000	0	0	0	0	0	0	0	0	0	0	0	0	0	0	0	0	0	720000	0	0	0	0	0	0	0	0	0	0	0	0	0	0	0	0	0
1023798138	80000	1100000	200000	0	0	0	0	0	0	0	0	0	0	0	0	0	0	0	0	0	1000000	0	0	0	0	0	0	0	0	0	0	0	0	0	0	0	0	0
1023664389	0	1820000	1800000	2980000	0	0	0	0	2000000	20000	0	0	0	580000	0	1960000	0	0	0	0	20000	0	0	0	0	0	0	0	0	0	0	0	0	0	0	0	0	0
1023653040	160000	1260000	1140000	2040000	1520000	1620000	680000	1060000	1280000	980000	1320000	1980000	2480000	1840000	0	1320000	1380000	840000	900000	1900000	1000000	2980000	980000	600000	1720000	0	1840000	1940000	1740000	1200000	960000	1220000	1120000	1880000	1860000	820000	1320000	1460000
1030719292	0	1120000	1340000	0	0	0	0	0	0	0	0	0	0	0	0	0	0	0	0	0	960000	0	0	0	0	0	0	0	0	0	0	0	0	0	0	0	0	0
1023225089	0	700000	700000	1120000	0	0	400000	620000	0	0	0	0	0	0	2040000	0	0	500000	540000	600000	940000	20000	600000	1060000	880000	1720000	520000	800000	1040000	0	0	0	0	0	0	0	600000	0
7882942	0	0	540000	2260000	1240000	0	0	0	0	1200000	20000	0	0	2240000	0	160000	1500000	0	0	0	0	0	0	0	0	0	0	0	0	0	0	1440000	0	0	2200000	0	0	1380000
1022588992	80000	1160000	380000	0	0	0	0	0	0	0	0	0	0	0	0	0	0	0	0	0	1420000	0	0	0	0	0	0	0	0	0	0	0	0	0	0	0	0	0
1022284047	260000	1060000	1480000	0	0	0	0	0	0	0	0	0	0	0	0	0	0	0	0	0	1140000	0	0	0	0	0	0	0	0	0	0	0	0	0	0	0	0	0
12225271	0	1460000	1380000	1120000	0	0	0	0	0	0	0	0	0	0	0	0	0	0	0	0	960000	0	0	0	0	0	0	0	0	0	0	0	0	0	0	0	0	0
1030903635	280000	1320000	1360000	2140000	860000	2060000	380000	0	180000	1280000	1640000	1840000	2120000	2560000	0	20000	580000	780000	980000	0	1640000	1820000	2160000	0	0	0	0	0	1540000	1400000	0	700000	1360000	720000	1600000	80000	840000	1700000
1022051298	260000	1400000	1680000	1720000	0	0	0	0	1100000	1060000	860000	0	0	580000	0	1320000	0	0	0	0	1520000	0	0	0	0	0	0	0	0	0	0	0	0	0	420000	0	0	300000
1021969251	300000	1360000	1380000	2500000	1020000	1920000	920000	320000	1680000	1200000	1400000	1220000	1760000	1900000	1700000	1460000	1020000	840000	980000	1760000	1520000	2140000	740000	2160000	1640000	2700000	2020000	2560000	1940000	1020000	660000	1600000	680000	960000	2200000	640000	980000	1580000
1032843005	0	1360000	820000	0	0	0	0	0	0	0	0	0	0	0	0	0	0	0	0	0	880000	0	0	0	0	0	0	0	0	0	0	0	0	0	0	0	0	0
8015352	260000	1380000	1400000	1840000	0	0	0	0	1380000	20000	2200000	0	0	3940000	0	1240000	0	0	0	0	1640000	0	0	0	0	0	0	0	0	0	0	0	0	0	0	0	0	1660000
1021818151	100000	1120000	940000	1120000	0	0	0	0	0	0	0	0	0	0	0	0	0	0	0	0	1100000	0	0	0	0	0	0	0	0	0	0	0	0	0	0	0	0	0
1021623449	260000	1000000	1100000	2260000	0	0	0	0	260000	0	0	0	0	0	0	1520000	0	0	0	0	1460000	0	0	0	0	0	0	0	0	0	0	0	0	0	0	0	0	0
1021209474	0	1360000	1400000	1960000	0	0	0	0	1580000	400000	1460000	0	0	1740000	0	1480000	0	0	0	0	1520000	0	0	0	0	0	0	0	0	0	0	0	0	0	0	0	0	1540000
1021176307	260000	1380000	880000	1060000	0	1000000	0	0	320000	940000	1140000	0	0	2000000	0	1020000	0	0	0	0	1240000	0	0	0	0	0	0	0	0	880000	1060000	0	740000	2580000	1520000	600000	920000	1320000
1015340422	0	1080000	920000	340000	0	0	0	0	0	0	0	0	0	0	0	0	0	0	0	0	1300000	0	0	0	0	0	0	0	0	0	0	0	0	0	0	0	0	0
10893810	260000	1080000	1260000	0	0	0	0	0	0	0	0	0	0	0	0	0	0	0	0	0	1280000	0	0	0	0	0	0	0	0	0	0	0	0	0	0	0	0	0
1031286098	240000	940000	1020000	1600000	0	0	0	0	300000	20000	1180000	0	0	1840000	0	1780000	0	0	0	0	1200000	0	0	0	0	0	0	0	0	0	0	0	0	0	0	0	0	1280000
9810215	260000	1380000	1380000	720000	0	0	0	0	0	0	0	0	0	0	0	0	0	0	0	0	1520000	0	0	0	0	0	0	0	0	0	0	0	0	0	0	0	0	0
1015147922	320000	1440000	680000	0	0	0	0	0	0	0	0	0	0	0	0	0	0	0	0	0	220000	0	0	0	0	0	0	0	0	0	0	0	0	0	0	0	0	0
1014987776	120000	1160000	1340000	520000	0	0	0	0	0	0	0	0	0	0	0	0	0	0	0	0	1040000	0	0	0	0	0	0	0	0	0	0	0	0	0	0	0	0	0
1031393426	260000	1300000	1320000	1420000	1260000	0	0	0	1580000	1340000	1540000	0	0	2360000	0	1100000	1520000	0	0	0	1500000	40000	0	0	0	0	0	0	0	0	0	1520000	0	0	2440000	0	0	1700000
1020522804	260000	1580000	1020000	1860000	1340000	0	0	0	2000000	1180000	1460000	0	0	2460000	0	2240000	1620000	0	0	0	1800000	2220000	0	0	0	0	0	0	0	0	0	1560000	0	0	2500000	0	0	1580000
10832062	0	1020000	460000	0	0	0	0	0	0	0	780000	0	0	1420000	0	0	0	0	0	0	1120000	0	0	0	0	0	0	0	0	0	0	0	0	0	0	0	0	1420000
1020314614	0	0	1000000	3640000	0	0	0	0	1860000	0	1660000	0	0	2460000	0	2760000	0	0	0	0	80000	0	0	0	0	0	0	0	0	0	0	0	0	0	0	0	0	200000
1020195206	160000	940000	920000	1360000	0	0	0	0	40000	20000	200000	0	0	40000	0	1160000	0	0	0	0	880000	0	0	0	0	0	0	0	0	720000	200000	0	360000	20000	0	440000	660000	1080000
1020186116	160000	2380000	2520000	320000	0	0	0	0	1520000	0	0	0	0	2240000	0	1320000	0	0	0	0	1340000	0	0	20000	0	0	0	0	0	0	0	0	0	0	0	0	0	0
11476171	220000	1220000	1180000	1840000	960000	1620000	620000	20000	2940000	0	1280000	1360000	1200000	1860000	0	1840000	920000	700000	780000	0	1000000	1600000	1060000	0	0	0	0	0	0	1060000	880000	120000	1040000	1780000	0	720000	1140000	1380000
1020016628	0	40000	1380000	2460000	0	0	0	0	1600000	0	0	0	0	40000	0	1660000	0	0	0	0	40000	0	0	0	0	0	0	0	0	0	0	0	0	0	0	0	0	0
1019958328	120000	760000	960000	1320000	0	0	0	0	0	0	1440000	0	0	2260000	0	0	0	0	0	0	1160000	0	0	0	0	0	0	0	0	0	0	0	0	0	0	0	0	1300000
11448727	0	1340000	1340000	0	0	0	0	0	0	0	0	0	0	0	0	0	0	0	0	0	1140000	0	0	0	0	0	0	0	0	0	0	0	0	0	0	0	0	0
1019629475	0	720000	280000	2300000	0	0	0	0	1320000	0	0	0	0	1160000	0	1620000	0	0	0	0	720000	0	0	0	0	0	0	0	0	0	0	0	0	0	0	0	0	0
1019597091	260000	1100000	1120000	1880000	960000	420000	680000	100000	1220000	900000	580000	1340000	1500000	940000	1740000	1160000	1100000	580000	880000	1760000	1340000	40000	940000	1140000	1400000	2040000	1540000	1980000	1840000	1080000	820000	1140000	1040000	1520000	1800000	700000	240000	540000
1019439597	260000	1380000	1420000	2280000	0	0	0	0	1660000	2020000	240000	0	0	2060000	0	1480000	0	0	0	0	1520000	0	0	0	0	0	0	0	0	0	0	0	0	0	1520000	0	0	1340000
8353577	260000	1640000	80000	0	0	0	0	0	0	0	0	0	0	0	0	0	0	0	0	0	1580000	0	0	0	0	0	0	0	0	0	0	0	0	0	0	0	0	0
8398244	180000	1360000	940000	2200000	0	0	0	0	1240000	0	1440000	0	0	2220000	0	1320000	0	0	0	0	1500000	0	0	0	0	0	0	0	0	0	0	0	0	0	0	0	0	1780000
1031819715	240000	1360000	1360000	2240000	0	0	0	0	1520000	1140000	1420000	0	0	2220000	0	1480000	0	0	0	0	1500000	0	0	0	0	0	0	0	0	0	0	180000	0	0	2140000	0	0	1560000
1018967921	0	840000	1000000	1360000	1320000	0	0	0	800000	1400000	960000	0	0	1000000	0	900000	1420000	0	0	0	1260000	0	0	0	0	0	0	0	0	0	0	1640000	0	0	2420000	0	0	840000
10609183	200000	840000	940000	1220000	1040000	1600000	460000	720000	1300000	840000	1080000	1580000	1600000	1820000	840000	1120000	1200000	580000	700000	1080000	940000	1680000	700000	0	1140000	0	1160000	1400000	1320000	1120000	880000	1180000	1060000	1980000	1660000	720000	1020000	1380000
1018733508	340000	1640000	1520000	2240000	1260000	3000000	0	0	1560000	1240000	1560000	1720000	1860000	2480000	0	1480000	2220000	0	0	0	1680000	2040000	0	0	0	0	0	0	0	1180000	0	1560000	0	0	2200000	0	1280000	1600000
1018578709	20000	40000	840000	1420000	40000	960000	400000	340000	1000000	600000	40000	440000	560000	60000	0	820000	560000	440000	540000	100000	640000	520000	600000	0	820000	0	1120000	1800000	1180000	860000	680000	300000	740000	1080000	1080000	60000	640000	20000
10606159	140000	700000	720000	320000	0	0	0	0	0	0	0	0	0	0	0	0	0	0	0	0	960000	0	0	0	0	0	0	0	0	0	0	0	0	0	0	0	0	0
1018434373	220000	1200000	1140000	1820000	0	0	0	0	900000	1160000	980000	0	0	1940000	0	1140000	0	0	0	0	1220000	0	0	0	0	0	0	0	0	0	0	0	0	0	0	0	0	1240000
1031995727	0	1340000	1220000	1660000	0	0	0	0	0	0	0	0	0	0	0	0	0	0	0	0	1360000	0	0	0	0	0	0	0	0	0	0	0	0	0	0	0	0	0
1018028628	80000	1020000	1080000	2080000	0	0	0	0	0	0	0	0	0	0	0	0	0	0	0	0	1060000	0	0	0	0	0	0	0	0	0	0	0	0	0	0	0	0	0
1017738160	220000	1040000	1100000	1940000	0	40000	0	0	1160000	60000	1500000	20000	0	1880000	0	1200000	0	0	0	0	1120000	20000	0	0	0	0	0	0	0	0	0	20000	0	0	20000	0	0	1420000
1017646021	0	960000	920000	680000	0	0	0	0	0	0	0	0	0	0	0	0	0	0	0	0	860000	0	0	0	0	0	0	0	0	0	0	0	0	0	0	0	0	0
1017391181	0	460000	1480000	2380000	0	0	0	0	1640000	1180000	1600000	0	0	2360000	0	1620000	0	0	0	0	100000	0	0	0	0	0	0	0	0	0	0	20000	0	0	2060000	0	0	1580000
1032194930	240000	1560000	1360000	2160000	0	0	0	0	0	0	0	0	0	0	0	0	0	0	0	0	2180000	0	0	0	0	0	0	0	0	0	0	0	0	0	0	0	0	0
9478462	260000	340000	1920000	0	0	0	0	0	0	0	0	0	0	0	0	0	0	0	0	0	600000	0	0	0	0	0	0	0	0	0	0	0	0	0	0	0	0	0
1016983561	20000	1020000	1080000	1580000	840000	1360000	420000	200000	0	820000	1000000	1140000	1320000	1700000	0	340000	1000000	500000	580000	0	960000	1360000	620000	0	0	0	0	0	0	760000	540000	980000	700000	1020000	1520000	460000	840000	1080000
1029237789	260000	1600000	1180000	2340000	60000	460000	480000	0	0	920000	0	0	0	840000	0	1120000	260000	600000	820000	0	1860000	0	1220000	0	0	0	1420000	2400000	2120000	1300000	0	0	1160000	1900000	1980000	80000	1320000	0
1029254982	320000	1540000	1380000	1420000	0	0	0	0	0	0	0	0	0	0	0	0	0	0	0	0	1540000	0	0	0	0	0	0	0	0	0	0	0	0	0	0	0	0	0
1029270225	280000	1400000	1400000	2620000	1800000	2120000	800000	220000	1720000	1320000	2000000	1840000	1980000	2340000	0	1600000	1980000	1120000	1060000	0	1540000	3060000	1340000	400000	1800000	20000	720000	1440000	2120000	0	0	2240000	0	1100000	3000000	0	60000	1760000
4465784	220000	680000	1360000	900000	1180000	0	920000	1200000	1020000	1200000	1040000	0	0	1640000	1880000	440000	380000	960000	2260000	1780000	60000	0	2720000	2120000	0	4180000	1500000	1700000	2060000	0	1060000	1580000	1240000	1600000	2160000	840000	20000	1120000
1029204462	240000	80000	1520000	2260000	0	0	0	0	1540000	0	0	0	0	0	0	1480000	0	0	0	0	1580000	0	0	0	0	0	0	0	0	0	0	0	0	0	0	0	0	0
1029187563	0	1360000	1380000	20000	0	0	0	0	0	0	0	0	0	0	0	0	0	0	0	0	1500000	0	0	0	0	0	0	0	0	0	0	0	0	0	0	0	0	0
1029157056	180000	940000	720000	0	0	0	0	0	0	0	0	0	0	0	0	0	0	0	0	0	1300000	0	0	0	0	0	0	0	0	0	0	0	0	0	0	0	0	0
1029153009	220000	880000	20000	0	80000	0	0	0	0	800000	0	0	0	1800000	0	0	0	0	0	0	1140000	0	0	0	0	0	0	0	0	0	0	300000	0	0	20000	0	0	0
4592314	0	0	20000	0	0	0	0	0	0	0	0	0	0	0	0	0	0	0	0	0	0	0	0	0	0	0	0	0	0	0	0	0	0	0	0	0	0	0
1029126351	0	0	1320000	2100000	0	0	0	0	1520000	780000	980000	0	0	2200000	0	1200000	0	0	0	0	20000	0	0	0	0	0	0	0	0	0	0	0	0	0	20000	0	0	1200000
1029371876	180000	1160000	1020000	1300000	900000	1380000	460000	700000	1220000	640000	940000	1140000	1280000	1660000	0	1020000	860000	580000	600000	1220000	1520000	1440000	780000	0	1120000	0	1260000	940000	1240000	880000	620000	1480000	700000	1220000	3120000	500000	860000	880000
4619824	260000	1360000	20000	0	0	0	0	0	0	0	0	0	0	0	0	0	0	0	0	0	1620000	0	0	0	0	0	0	0	0	0	0	0	0	0	0	0	0	0
1029432944	0	1400000	1360000	2300000	1260000	0	0	0	1580000	0	20000	0	0	0	0	1480000	1080000	0	0	0	20000	640000	0	0	0	0	0	0	0	0	0	1200000	0	0	0	0	0	1240000
1029438212	260000	1600000	1460000	2300000	1140000	0	0	0	2320000	1400000	1340000	0	0	2240000	0	1700000	960000	0	0	0	1740000	0	0	0	0	0	0	0	0	0	0	1100000	0	0	2300000	0	0	1800000
1029073273	200000	1360000	1340000	2580000	0	0	0	0	180000	0	0	0	0	0	0	80000	0	0	0	0	1860000	0	0	0	0	0	0	0	0	0	0	0	0	0	0	0	0	0
1028884270	240000	1180000	1160000	2460000	0	0	0	0	1500000	1000000	1960000	0	0	2860000	0	1580000	0	0	0	0	2000000	0	0	0	0	0	0	0	0	0	0	0	0	0	680000	0	0	2140000
1028879254	0	0	100000	0	0	0	0	0	0	0	0	0	0	0	0	0	0	0	0	0	40000	0	0	0	0	0	0	0	0	0	0	0	0	0	0	0	0	0
1028860753	280000	1420000	1540000	1320000	0	0	0	0	0	0	0	0	0	0	0	20000	0	0	0	0	2940000	0	0	0	0	0	0	0	0	0	0	0	0	0	0	0	0	0
1029448295	0	2180000	2080000	260000	640000	0	140000	0	0	1440000	1540000	1640000	480000	2380000	0	0	1720000	180000	0	0	2420000	2740000	140000	0	0	0	0	0	0	40000	1160000	1620000	880000	2740000	3900000	920000	380000	1520000
1029448604	460000	1380000	1360000	0	0	0	0	0	0	0	0	0	0	0	0	0	0	0	0	0	1960000	0	0	0	0	0	0	0	0	0	0	0	0	0	0	0	0	0
1029461540	260000	1400000	1500000	2500000	1280000	2060000	0	0	1800000	1220000	1340000	1680000	2200000	2260000	0	1340000	1540000	0	0	0	1620000	2000000	0	0	0	0	0	0	0	0	0	1400000	0	0	2500000	0	40000	1680000
7413039	20000	1420000	1380000	440000	0	0	800000	1200000	1500000	0	0	0	0	20000	0	1460000	0	1000000	1040000	2260000	820000	0	1200000	0	0	0	260000	2380000	1840000	1360000	1040000	0	1280000	2020000	0	860000	1280000	0
1023330737	140000	1440000	1400000	2340000	1460000	0	0	0	0	1180000	1700000	0	0	2420000	0	600000	1540000	0	0	0	1600000	500000	0	0	0	0	0	0	0	0	0	2160000	0	0	3080000	0	0	2200000
1022804701	40000	1420000	1900000	1860000	0	0	0	0	0	0	0	0	0	0	0	540000	0	0	0	0	1380000	0	0	0	0	0	0	0	0	0	0	0	0	0	0	0	0	0
1027962264	160000	1120000	1100000	2080000	1080000	2200000	700000	160000	1520000	1180000	1040000	1680000	2200000	1800000	0	1500000	1480000	1000000	1060000	0	840000	2060000	1500000	0	0	0	0	0	0	1080000	860000	1480000	1340000	1900000	2660000	740000	1300000	1740000
1028060961	260000	1480000	1460000	0	880000	1780000	0	0	0	1420000	1540000	1700000	1900000	2460000	0	0	1000000	0	0	0	1140000	2060000	0	0	0	0	0	0	0	80000	0	1400000	0	0	2260000	0	1260000	580000
1030127188	0	1360000	900000	2300000	1080000	580000	480000	760000	0	440000	0	1580000	1940000	0	0	860000	1460000	700000	0	1000000	1540000	2060000	0	0	0	0	0	2060000	2100000	40000	1060000	1180000	1240000	440000	1940000	1040000	1820000	0
1024387286	100000	940000	2000000	2560000	0	900000	0	0	1440000	0	120000	180000	2140000	2400000	0	1260000	40000	0	0	0	2120000	2040000	0	0	0	0	0	0	0	0	0	0	0	0	0	0	0	400000
11058691	260000	700000	740000	2240000	1140000	1740000	0	0	1520000	1200000	0	1660000	320000	800000	0	1480000	60000	0	0	0	1100000	1980000	0	0	0	0	0	0	0	160000	700000	1460000	880000	1000000	2460000	660000	480000	0
1029747230	160000	1420000	1360000	2300000	0	0	0	0	0	0	0	0	0	0	0	20000	0	0	0	0	1380000	0	0	0	0	0	0	0	0	0	0	0	0	0	0	0	0	0
7546890	260000	1740000	1440000	2440000	0	0	0	0	0	0	20000	0	0	2300000	0	20000	0	0	0	0	1660000	0	0	0	0	0	0	0	0	0	0	0	0	0	0	0	0	0
1029760604	320000	2240000	360000	2300000	0	1940000	760000	1200000	1520000	760000	1440000	3280000	1940000	2240000	820000	1540000	0	980000	1040000	2220000	2460000	2240000	1180000	1040000	20000	1060000	0	0	0	1020000	20000	0	1120000	1580000	0	20000	1200000	1580000
1169574	180000	1480000	1460000	2160000	1440000	1100000	360000	860000	1580000	1320000	1440000	1800000	1900000	2220000	0	1040000	1500000	860000	2620000	0	1780000	1860000	1560000	0	0	0	0	0	120000	1320000	940000	1500000	620000	2000000	280000	840000	1400000	2140000
1024839378	260000	1360000	1460000	2460000	0	0	0	0	0	0	0	0	0	0	0	1520000	0	0	0	0	1520000	0	0	0	0	0	0	0	0	0	0	0	0	0	0	0	0	0
1023802995	0	900000	440000	120000	0	0	0	0	0	760000	0	0	0	0	0	0	0	0	0	0	720000	0	0	0	0	0	0	0	0	0	0	0	0	0	140000	0	0	0
1018855911	260000	1360000	1380000	2240000	1240000	2040000	0	0	1520000	1180000	1480000	1700000	2120000	2180000	0	1500000	1520000	0	0	0	1500000	2000000	0	0	0	0	0	0	0	0	0	1400000	0	0	2100000	0	0	1600000
7715270	0	400000	1040000	1800000	940000	2020000	0	0	1360000	780000	1820000	1300000	1680000	1780000	0	1820000	0	0	0	20000	860000	2220000	0	1140000	2060000	0	1620000	1120000	840000	1540000	680000	760000	1940000	0	1160000	940000	1260000	1760000
1030128493	140000	1600000	1680000	20000	0	0	0	0	0	0	0	0	0	0	0	0	0	0	0	0	1540000	0	0	0	0	0	0	0	0	0	0	0	0	0	0	0	0	0
1031457572	400000	1680000	1680000	2340000	0	0	0	0	1680000	40000	1580000	0	0	2460000	0	1560000	0	0	0	0	1700000	0	0	0	0	0	0	0	0	0	0	0	0	0	0	0	0	1640000
1031414900	0	1360000	20000	0	0	0	0	0	0	0	0	0	0	0	0	0	0	0	0	0	1460000	0	0	0	0	0	0	0	0	0	0	0	0	0	0	0	0	0
1024157078	0	0	1260000	2240000	1220000	0	0	0	1540000	1180000	1460000	0	0	2360000	0	1680000	1480000	0	0	0	120000	1600000	0	0	0	0	0	0	0	1300000	1160000	1400000	1320000	2080000	2220000	900000	940000	1660000
1029806281	180000	1160000	1220000	20000	0	0	0	0	0	0	0	0	0	0	0	0	0	0	0	0	1140000	0	0	0	0	0	0	0	0	0	0	0	0	0	0	0	0	0
4509809	400000	2280000	1920000	3400000	140000	0	0	0	4760000	3200000	3180000	0	0	4340000	0	2220000	0	0	0	0	2060000	0	0	0	0	0	0	0	0	0	0	1260000	0	0	4440000	0	0	3460000
1018886469	0	1320000	1440000	240000	540000	0	0	0	0	1160000	0	0	0	0	0	0	0	0	0	0	0	0	0	0	0	0	0	0	0	0	0	1420000	0	0	2160000	0	0	0
1030279906	0	1360000	240000	0	0	0	0	0	0	0	0	0	0	0	0	0	0	0	0	0	1540000	0	0	0	0	0	0	0	0	0	0	0	0	0	0	0	0	0
1020561835	0	0	860000	660000	0	0	0	0	0	0	0	0	0	0	0	0	0	0	0	0	20000	0	0	0	0	0	0	0	0	0	0	0	0	0	0	0	0	0
1016988473	280000	1360000	1440000	2400000	1260000	1940000	780000	1220000	1600000	1040000	1520000	1760000	1920000	2460000	2120000	1540000	1540000	1000000	1000000	2260000	1380000	2020000	1220000	2060000	1840000	2360000	1780000	2440000	2200000	1340000	700000	1380000	1300000	1720000	2280000	720000	1280000	1780000
1029657908	240000	660000	260000	0	0	0	0	0	0	0	0	0	0	0	0	0	0	0	0	0	960000	0	0	0	0	0	0	0	0	0	0	0	0	0	0	0	0	0
1030390768	340000	1300000	1000000	680000	0	0	0	0	1280000	0	1000000	0	0	1500000	0	340000	0	0	0	0	1100000	0	0	0	0	0	0	0	0	0	0	0	0	0	0	0	0	940000
11886052	0	1060000	1100000	1920000	980000	1540000	0	0	1440000	880000	800000	1360000	560000	160000	0	1200000	1880000	0	0	0	360000	1720000	0	0	0	0	0	0	0	0	0	1000000	0	0	1660000	0	740000	820000
9526366	0	40000	60000	80000	0	0	0	0	40000	0	0	0	0	1980000	0	80000	0	0	0	0	80000	0	0	0	0	0	0	0	0	0	0	0	0	0	0	0	0	0
1023007288	140000	1400000	1260000	1680000	0	0	0	0	700000	1140000	1320000	0	0	2160000	0	400000	0	0	0	0	1800000	0	0	0	0	0	0	0	0	0	0	840000	0	0	2140000	0	0	1580000
1031344959	200000	1440000	1020000	0	0	0	0	0	0	0	0	0	0	0	0	0	0	0	0	0	1580000	0	0	0	0	0	0	0	0	0	0	0	0	0	0	0	0	0
1882929	260000	1440000	1380000	1260000	0	0	0	0	0	0	0	0	0	0	0	0	0	0	0	0	1560000	0	0	0	0	0	0	0	0	0	0	0	0	0	0	0	0	0
1030429482	280000	1420000	1460000	2020000	0	0	0	0	160000	0	0	0	0	0	0	1620000	0	0	0	0	1760000	0	0	0	0	0	0	0	0	0	0	0	0	0	0	0	0	0
1024432687	0	880000	1420000	1420000	0	0	0	0	1220000	0	0	0	0	4680000	0	1120000	0	0	0	0	820000	0	0	0	0	0	0	0	0	0	0	0	0	0	0	0	0	0
1691899	140000	800000	720000	1380000	0	0	0	0	680000	0	0	0	0	0	0	1040000	0	0	0	0	1260000	0	0	0	0	0	0	0	0	0	0	0	0	0	0	0	0	0
11415065	160000	1360000	1180000	2280000	640000	40000	780000	120000	1020000	1180000	1440000	40000	20000	2240000	80000	1480000	100000	980000	1040000	0	1420000	60000	1160000	80000	20000	40000	60000	20000	60000	20000	1060000	60000	920000	2020000	2180000	840000	40000	1560000
11432516	0	440000	1400000	0	0	0	0	0	0	0	0	0	0	0	0	0	0	0	0	0	640000	0	0	0	0	0	0	0	0	0	0	0	0	0	0	0	0	0
12017547	0	1400000	1320000	0	0	0	0	0	0	0	0	0	0	0	0	0	0	0	0	0	1540000	0	0	0	0	0	0	0	0	0	0	0	0	0	0	0	0	0
1017520409	0	1020000	420000	0	0	0	0	0	0	0	0	0	0	0	0	0	0	0	0	0	1460000	0	0	0	0	0	0	0	0	0	0	0	0	0	0	0	0	0
1016951888	100000	1000000	1020000	1600000	0	0	0	0	1520000	0	0	0	0	20000	0	1380000	0	0	0	0	1120000	0	0	0	0	0	0	0	0	0	0	0	0	0	0	0	0	0
1017889612	0	480000	600000	1580000	0	0	0	0	1280000	0	0	0	0	0	0	1120000	0	0	0	0	1100000	0	0	0	0	0	0	0	0	0	0	0	0	0	0	0	0	0
1018911549	0	2500000	1380000	2420000	0	0	0	0	1520000	0	0	0	0	440000	0	1440000	0	0	0	0	1720000	0	0	0	0	0	0	0	0	0	0	0	0	0	0	0	0	0
1025658116	180000	560000	620000	1000000	2280000	2280000	460000	760000	1560000	1160000	1160000	1720000	1720000	1820000	40000	1340000	1260000	860000	600000	1280000	560000	1660000	660000	0	0	0	0	820000	1460000	1420000	720000	1440000	1220000	1260000	2180000	580000	2640000	1380000
1032898110	140000	1440000	1560000	200000	0	0	0	0	0	0	0	0	0	0	0	20000	0	0	0	0	1620000	0	0	0	0	0	0	0	0	0	0	0	0	0	0	0	0	0
1029665567	560000	7600000	6280000	10740000	1340000	2800000	0	0	2880000	2180000	2580000	1340000	1600000	440000	0	4420000	1200000	0	0	0	5980000	1680000	0	0	0	0	0	0	0	1160000	900000	2540000	1120000	1940000	4140000	700000	1140000	2980000
1029997048	0	1460000	1520000	2700000	1260000	1160000	400000	720000	1720000	0	0	1300000	1280000	2400000	0	1620000	1360000	420000	380000	20000	1620000	2160000	620000	0	0	0	140000	1580000	1240000	1040000	720000	1380000	880000	0	80000	500000	980000	0
1028865896	0	1520000	1460000	1960000	20000	0	0	0	0	100000	1260000	0	0	2160000	0	0	0	0	0	0	1280000	0	0	0	0	0	0	0	0	0	0	0	0	0	0	0	0	1260000
1027821219	260000	1700000	640000	0	0	0	0	0	0	0	1200000	0	0	2320000	0	0	0	0	0	0	2640000	0	0	0	0	0	0	0	0	0	0	0	0	0	0	0	0	0
1029894958	240000	1600000	1620000	2300000	0	400000	0	0	1560000	940000	1440000	1720000	1740000	2260000	0	1460000	0	0	0	0	1580000	2480000	0	0	0	0	0	0	0	0	0	0	0	0	0	0	0	1620000
1029471153	360000	1440000	1480000	2260000	0	0	0	0	80000	0	0	0	0	0	0	1760000	0	0	0	0	1780000	0	0	0	0	0	0	0	0	0	0	0	0	0	0	0	0	0
1029577116	0	20000	20000	0	0	0	0	0	0	0	0	0	0	0	0	0	0	0	0	0	20000	0	0	0	0	0	0	0	0	0	0	0	0	0	0	0	0	0
1029997000	0	1480000	1680000	2520000	0	760000	0	0	3360000	100000	240000	40000	180000	2000000	0	1520000	0	0	0	0	2500000	960000	0	0	0	0	0	0	0	0	0	0	0	0	0	0	420000	60000
1029583665	320000	1360000	1700000	2320000	0	0	0	0	0	0	0	0	0	0	0	20000	0	0	0	0	1620000	0	0	0	0	0	0	0	0	0	0	0	0	0	0	0	0	0
1031041414	140000	1380000	1620000	2480000	1220000	1700000	780000	1260000	300000	1180000	1480000	1680000	1960000	2300000	1640000	1740000	1500000	1020000	940000	1860000	1520000	1900000	1260000	1820000	580000	2140000	1520000	4880000	440000	1280000	1160000	1380000	1000000	2140000	2280000	800000	1220000	1600000
1020639853	220000	1100000	1100000	1840000	0	0	0	0	2400000	0	0	0	0	20000	0	1200000	0	0	0	0	1200000	0	0	0	0	0	0	0	0	0	0	0	0	0	0	0	0	0
1954680	200000	1420000	1400000	1940000	1080000	1720000	760000	760000	1280000	1260000	1120000	1380000	1860000	1880000	1840000	1420000	1180000	880000	1140000	1320000	1240000	1540000	1160000	1320000	1180000	1760000	1220000	2100000	2100000	1820000	920000	1200000	1280000	2080000	1840000	840000	980000	1080000
1029328156	40000	1400000	800000	260000	0	0	0	0	0	520000	40000	0	0	2260000	0	0	0	0	0	0	1520000	40000	0	0	0	0	0	0	1060000	0	0	0	0	0	0	0	0	0
1030242160	200000	1620000	1400000	40000	0	0	0	0	0	0	0	0	0	0	0	0	0	0	0	0	1700000	0	0	0	0	0	0	0	0	0	0	0	0	0	0	0	0	0
1030446162	240000	1320000	1540000	1160000	0	0	0	0	0	0	0	0	0	0	0	0	0	0	0	0	1460000	0	0	0	0	0	0	0	0	0	0	0	0	0	0	0	0	0
1019875446	80000	2660000	1720000	2240000	0	0	0	0	1520000	0	1440000	0	0	2300000	0	1480000	0	0	0	0	140000	0	0	0	0	0	0	0	0	0	0	0	0	0	0	0	0	1260000
1020326555	0	1360000	840000	0	0	0	0	0	1420000	0	0	0	0	0	0	620000	1080000	0	0	0	1320000	0	0	0	0	0	0	0	0	0	0	0	0	0	0	0	0	0
1029584163	60000	880000	660000	1660000	0	0	0	0	1740000	1380000	980000	0	0	2480000	0	1620000	0	0	0	0	820000	0	0	0	0	0	0	0	0	0	0	0	0	0	1100000	0	0	1400000
1020327860	0	0	20000	640000	0	0	0	0	1880000	0	0	0	200000	580000	0	1620000	0	0	0	0	0	0	0	0	0	0	0	0	0	0	0	0	0	0	0	0	0	0
1028935298	0	1060000	20000	40000	0	0	0	0	0	0	0	0	0	0	0	180000	0	0	0	0	1320000	0	0	0	0	0	0	0	0	0	0	0	0	0	0	0	0	0
1020328043	40000	1540000	1400000	1860000	0	0	0	0	1680000	0	20000	0	0	480000	0	1560000	0	0	0	0	1520000	0	0	0	0	0	0	0	0	0	0	0	0	0	0	0	0	0
1031049175	0	1480000	1400000	1860000	820000	0	0	0	1840000	1100000	1000000	0	0	1440000	0	1900000	40000	0	0	0	420000	0	0	0	0	0	0	0	0	0	0	1560000	0	0	1940000	0	0	1620000
1020285551	240000	1160000	1180000	40000	0	0	0	0	0	0	0	0	0	0	0	0	0	0	0	0	1260000	0	0	0	0	0	0	0	0	0	0	0	0	0	0	0	0	0
1029276307	260000	1080000	1760000	3100000	0	0	0	0	2920000	0	1200000	0	0	2900000	0	3040000	0	0	0	0	1500000	0	0	0	0	0	0	0	0	0	0	0	0	0	0	0	0	0
1019578714	0	1380000	1520000	2180000	0	1620000	0	0	0	0	0	0	1960000	0	0	1040000	0	0	0	0	1160000	0	0	0	0	0	0	0	0	0	0	0	0	0	0	0	0	0
1029680333	0	1580000	1380000	460000	0	0	0	0	0	0	0	0	0	40000	0	0	0	0	0	0	1360000	0	0	0	0	0	0	0	0	0	0	0	0	0	0	0	0	0
1030569579	0	1340000	1440000	2200000	20000	0	0	0	1460000	1100000	1600000	0	0	2260000	0	280000	0	0	0	0	1300000	0	0	0	0	0	0	0	0	0	0	1400000	0	0	1520000	0	0	1580000
1029419247	180000	940000	940000	1500000	0	0	0	0	0	0	0	0	0	0	0	40000	0	0	0	0	1200000	800000	0	0	0	0	0	0	0	0	0	0	0	0	0	0	0	0
1024527532	160000	1160000	1300000	0	0	0	0	0	0	0	0	0	0	0	0	0	0	0	0	0	1160000	0	0	0	0	0	0	0	0	0	0	0	0	0	0	0	0	0
10053758	180000	660000	320000	0	0	0	0	0	0	0	0	0	0	0	0	0	0	0	0	0	900000	0	0	0	0	0	0	0	0	0	0	0	0	0	0	0	0	0
1019652975	80000	1340000	1160000	40000	0	0	0	0	0	0	0	0	0	0	0	560000	0	0	0	0	2460000	0	0	0	0	0	0	0	0	0	0	0	0	0	0	0	0	0
1024980476	0	1380000	1360000	20000	0	0	0	0	0	0	0	0	0	0	0	0	0	0	0	0	1300000	0	0	0	0	0	0	0	0	0	0	0	0	0	0	0	0	0
1024991120	300000	1480000	80000	0	0	0	0	0	0	0	0	0	0	0	0	0	0	0	0	0	1540000	0	0	0	0	0	0	0	0	0	0	0	0	0	0	0	0	0
1024534327	0	1440000	1480000	800000	0	0	0	0	0	0	0	0	0	0	0	0	0	0	0	0	1180000	0	0	0	0	0	0	0	0	0	0	0	0	0	0	0	0	0
1019687739	0	1440000	1420000	2320000	0	1760000	780000	1160000	1660000	980000	1560000	1740000	2000000	2280000	0	1720000	1560000	980000	1040000	2260000	1520000	2020000	1180000	0	0	0	0	540000	2060000	1340000	1060000	120000	1300000	2120000	1800000	900000	1280000	1620000
1029078497	200000	900000	920000	1760000	0	0	0	0	0	0	0	0	0	0	0	1400000	0	0	0	0	1220000	0	0	0	0	0	0	0	0	0	0	0	0	0	0	0	0	0
1029236938	260000	1060000	120000	0	0	0	0	0	0	0	0	0	0	0	0	0	0	0	0	0	1560000	0	0	0	0	0	0	0	0	0	0	0	0	0	0	0	0	0
10290793	0	1380000	40000	0	0	0	0	0	0	0	0	0	0	0	0	0	0	0	0	0	1620000	0	0	0	0	0	0	0	0	0	0	0	0	0	0	0	0	0
1029097568	260000	1100000	1120000	1460000	0	740000	80000	240000	860000	0	1000000	0	0	2460000	0	800000	0	200000	80000	120000	1080000	240000	160000	0	0	0	0	0	0	0	560000	0	0	120000	0	180000	0	1120000
1029102352	0	20000	520000	2140000	0	0	0	0	420000	0	0	0	0	140000	0	880000	0	0	0	0	60000	0	0	0	0	0	0	0	0	0	0	0	0	0	0	0	0	0
1031013091	0	1380000	1400000	2060000	0	0	0	0	0	0	0	0	0	0	0	1180000	0	0	0	0	880000	0	0	0	0	0	0	0	0	0	0	0	0	0	0	0	0	0
1028661546	0	1540000	820000	0	0	0	0	0	0	0	0	0	0	0	0	0	0	0	0	0	1500000	0	0	0	0	0	0	0	0	0	0	0	0	0	0	0	0	0
1028721345	320000	1580000	1380000	2280000	1320000	1980000	1020000	1000000	1540000	1760000	2480000	1680000	2100000	2300000	2140000	1900000	1240000	1300000	1160000	40000	1960000	2360000	2080000	2240000	1900000	2460000	2460000	2600000	2360000	1820000	1080000	1400000	1280000	1680000	2500000	860000	1580000	1780000
1023411212	380000	1340000	740000	920000	0	0	0	0	780000	0	720000	0	0	1200000	800000	800000	0	0	0	0	1480000	0	0	1100000	960000	1260000	960000	1280000	1140000	0	0	0	0	0	0	0	0	680000
1015235804	180000	680000	1060000	0	0	0	0	0	0	0	0	0	0	0	0	0	0	0	0	0	1080000	0	0	0	0	0	0	0	0	0	0	0	0	0	0	0	0	0
823048	180000	1180000	1240000	2240000	1360000	1840000	760000	1120000	1400000	1160000	1520000	1660000	1860000	1460000	2120000	1500000	1480000	940000	1020000	2200000	940000	2160000	1060000	2120000	1800000	2500000	1880000	2460000	1700000	1060000	880000	1580000	1040000	1700000	2240000	680000	1120000	1560000
1018344767	280000	1160000	1160000	1660000	620000	0	0	0	600000	1160000	1440000	860000	0	2140000	0	700000	20000	0	0	0	1280000	1040000	0	0	0	0	0	0	0	0	0	400000	0	0	1020000	0	0	1340000
1029683996	260000	1380000	1840000	1540000	0	0	0	0	0	0	0	0	0	0	0	0	0	0	0	0	1680000	0	0	0	0	0	0	0	0	0	0	0	0	0	0	0	0	0
1029601253	0	1480000	1400000	2100000	0	0	0	0	1240000	1220000	1920000	0	0	2760000	0	1060000	0	0	0	0	1540000	0	0	0	0	0	0	0	0	0	0	980000	0	0	2600000	0	0	1840000
1018292019	40000	20000	60000	40000	0	0	0	0	40000	0	0	0	0	20000	0	80000	0	0	0	0	40000	0	0	0	0	0	0	0	0	0	0	0	0	0	0	0	0	0
1029508068	0	1360000	1380000	2240000	0	0	0	0	1240000	0	0	0	0	0	0	1500000	0	0	0	0	1500000	0	0	0	0	0	0	0	0	0	0	0	0	0	0	0	0	0
1029542187	260000	1140000	1400000	1800000	0	0	0	0	1580000	0	0	0	0	1180000	0	1520000	0	0	0	0	1560000	0	0	0	0	0	0	0	0	0	0	0	0	0	0	0	0	0
1027356740	140000	900000	560000	900000	1300000	1920000	0	0	0	1080000	540000	1740000	2000000	0	0	1300000	1500000	0	0	0	1040000	2040000	0	0	0	0	0	0	0	1140000	1060000	1380000	1360000	860000	1900000	860000	1240000	1060000
1017369426	140000	1400000	1400000	2280000	0	0	0	0	1520000	0	0	0	0	80000	0	1660000	0	0	0	0	1520000	0	0	0	0	0	0	0	0	0	0	0	0	0	0	0	0	0
1029705467	280000	680000	1540000	1940000	460000	1220000	0	0	1540000	1320000	0	1460000	1260000	240000	0	1120000	540000	0	0	0	1380000	540000	0	0	0	0	0	0	0	20000	800000	740000	20000	140000	960000	760000	660000	40000
8331903	260000	1020000	1100000	2340000	1000000	2040000	880000	1280000	1520000	1380000	1500000	1940000	4760000	1040000	1760000	1540000	1500000	1360000	1660000	2240000	1140000	3560000	1220000	1660000	1820000	2320000	1440000	2320000	3400000	1300000	1060000	1120000	1480000	2520000	2320000	1000000	1420000	2300000
1027608052	0	0	40000	880000	0	1300000	40000	1440000	1020000	780000	980000	260000	1260000	1540000	2640000	1020000	0	720000	680000	2160000	0	0	820000	1520000	1200000	1840000	1240000	1660000	1380000	0	0	0	0	0	620000	0	0	1060000
1025036642	300000	1380000	1740000	2500000	1240000	880000	0	0	1640000	1160000	1440000	1680000	1880000	2320000	0	1720000	500000	0	0	0	1660000	1780000	0	0	0	0	0	0	0	0	0	1400000	0	0	2160000	0	0	1580000
10967251	260000	1040000	960000	1920000	0	0	0	0	1640000	0	0	0	0	0	0	1400000	0	0	0	0	1660000	0	0	0	0	0	0	0	0	0	0	0	0	0	0	0	0	0
4058266	300000	560000	1020000	0	0	0	0	0	0	0	0	0	0	0	0	0	0	0	0	0	1340000	0	0	0	0	0	0	0	0	0	0	0	0	0	0	0	0	0
1030287976	280000	1360000	1380000	2240000	960000	1540000	280000	0	0	940000	560000	560000	1500000	1440000	1640000	740000	1200000	80000	100000	0	1480000	1600000	880000	1400000	1160000	580000	1720000	3460000	160000	860000	840000	880000	1040000	500000	1640000	680000	1040000	180000
1028960177	0	1380000	940000	1560000	0	0	0	0	1620000	0	0	0	0	800000	0	1440000	0	0	0	0	1600000	0	0	0	0	0	0	0	0	0	0	0	0	0	0	0	0	0
1015186542	0	0	40000	80000	360000	0	0	0	1520000	1200000	1440000	0	0	80000	0	1600000	580000	0	0	0	40000	0	80000	0	1240000	0	1200000	620000	0	0	0	1380000	0	0	2180000	0	0	1560000
1019954048	280000	1420000	1480000	2260000	1700000	280000	780000	1300000	1700000	1160000	1080000	260000	1480000	1540000	0	1540000	1660000	0	0	1180000	1500000	2060000	340000	0	0	0	0	0	0	1340000	0	1400000	1340000	0	2380000	720000	0	1680000
1029615722	0	1040000	860000	0	0	0	0	0	0	0	0	0	0	0	0	0	0	0	0	0	1100000	0	0	0	0	0	0	0	0	0	0	0	0	0	0	0	0	0
1015165323	280000	1140000	1440000	1380000	1380000	1580000	800000	1200000	1340000	1080000	1380000	160000	1640000	2160000	1740000	1460000	780000	1020000	1000000	2300000	1240000	80000	860000	2060000	1420000	2000000	1580000	1920000	1780000	820000	0	1320000	20000	1340000	2240000	0	980000	1060000
1026304836	300000	1500000	1440000	2440000	0	0	0	0	1580000	1200000	1600000	0	0	2720000	0	1440000	0	0	0	0	1680000	0	0	0	0	0	0	0	0	0	0	800000	0	0	2700000	0	0	1780000
11004571	160000	1060000	840000	1660000	0	0	0	0	1520000	0	0	0	0	0	0	280000	0	0	0	0	1140000	0	0	0	0	0	0	0	0	0	0	0	0	0	0	0	0	0
1017790763	260000	0	20000	0	0	0	0	0	0	0	0	0	0	0	0	0	0	0	0	0	1160000	0	0	0	0	0	0	0	0	0	0	0	0	0	0	0	0	0
1030461288	0	0	20000	160000	0	0	0	0	1500000	0	0	0	0	440000	0	640000	0	0	0	0	80000	0	0	0	0	0	0	0	0	0	0	0	0	0	0	0	0	0
1025827163	200000	1400000	1360000	0	0	0	0	0	0	0	0	0	0	0	0	0	0	0	0	0	1520000	0	0	0	0	0	0	0	0	0	0	0	0	0	0	0	0	0
1027404377	460000	1360000	1080000	2180000	0	0	0	0	1140000	0	1380000	0	0	2260000	0	1640000	0	0	0	0	2020000	0	0	0	0	0	0	0	0	0	0	0	0	0	0	0	0	1320000
1029709991	260000	1380000	1460000	2300000	0	0	0	0	1520000	0	1480000	0	0	2540000	0	1500000	0	0	0	0	1560000	0	0	0	0	0	0	0	0	0	0	0	0	0	0	0	0	1580000
1028965790	260000	1680000	1420000	700000	0	0	0	0	1600000	0	680000	0	0	2360000	0	1580000	0	0	0	0	1520000	0	0	0	0	0	0	0	0	0	0	0	0	0	0	0	0	0
1015146300	140000	2600000	1540000	2240000	1640000	1980000	0	0	220000	1460000	1480000	1720000	2980000	2520000	0	1500000	1500000	0	0	0	1060000	2000000	0	0	0	0	0	0	0	0	0	1420000	0	0	2700000	0	900000	1580000
1031594237	0	1320000	1400000	2280000	0	0	0	0	1660000	0	0	0	0	20000	0	1520000	0	0	0	0	1580000	0	0	0	0	0	0	0	0	0	0	0	0	0	0	0	0	0
11598065	240000	1360000	1360000	2280000	0	0	0	0	1480000	0	0	0	0	0	0	1480000	0	0	0	0	1560000	0	0	0	0	0	0	0	0	0	0	0	0	0	0	0	0	0
1023163023	280000	1340000	1380000	2240000	0	0	0	0	0	0	0	0	0	0	0	0	0	0	0	0	1440000	0	0	0	0	0	0	0	0	0	0	0	0	0	0	0	0	0
1023499535	100000	1100000	20000	0	0	0	0	0	0	0	0	0	0	0	0	0	0	0	0	0	1360000	0	0	0	0	0	0	0	0	0	0	0	0	0	0	0	0	0
1022434812	260000	1380000	1380000	1860000	840000	1300000	0	0	0	700000	1240000	1160000	1320000	1300000	0	1060000	1120000	0	0	0	1500000	1780000	0	0	0	0	0	0	0	0	0	820000	0	0	1380000	0	600000	960000
2092350	120000	980000	1080000	1600000	400000	980000	20000	20000	880000	0	780000	840000	960000	1140000	0	840000	680000	0	100000	0	880000	1060000	200000	0	0	0	0	0	0	620000	400000	580000	620000	860000	760000	300000	660000	800000
1018223118	260000	1400000	1420000	940000	1040000	0	0	0	980000	860000	1460000	0	0	2380000	0	0	740000	0	0	0	1520000	20000	0	0	0	0	0	0	0	0	0	1180000	0	0	1760000	0	0	1340000
1022014333	260000	1360000	1260000	2260000	0	0	0	0	1600000	0	0	0	0	0	0	1480000	0	0	0	0	1940000	0	0	0	0	0	0	0	0	0	0	0	0	0	0	0	0	0
10797287	240000	1560000	1140000	1160000	0	0	0	0	1540000	100000	1620000	0	0	2520000	0	1660000	0	0	0	0	1280000	0	0	0	0	0	0	0	0	0	0	0	0	0	0	0	0	2000000
1026125257	240000	1420000	1440000	2380000	1140000	2120000	920000	1340000	720000	1220000	1420000	1760000	2020000	2260000	0	1500000	1980000	980000	960000	2260000	1620000	2140000	1140000	0	0	0	0	200000	2180000	1560000	840000	1400000	1320000	1580000	2460000	820000	1320000	1620000
1029462555	0	2240000	1420000	1560000	0	0	0	0	360000	0	0	0	0	0	0	460000	0	0	0	0	1920000	0	0	0	0	0	0	0	0	0	0	0	0	0	0	0	0	0
1029299623	100000	2380000	1480000	2100000	0	0	0	0	520000	20000	0	0	0	0	0	1480000	0	0	0	0	1800000	0	0	0	0	0	0	0	0	0	0	0	0	0	0	0	0	0
5183916	240000	2240000	2740000	2820000	1240000	0	0	0	1520000	2320000	2820000	0	0	2300000	0	1480000	1480000	0	0	0	2740000	760000	0	0	0	0	0	0	0	0	0	1400000	0	0	4580000	0	0	1640000
855784	0	0	420000	1080000	0	0	0	0	0	0	0	0	0	0	0	300000	0	0	0	0	0	0	0	0	0	0	0	0	0	0	0	0	0	0	0	0	0	0
1020902537	280000	1440000	1840000	2300000	1280000	0	0	0	1460000	1200000	980000	0	0	2080000	0	1600000	0	0	0	0	1660000	0	0	0	0	0	0	0	0	0	0	1440000	0	0	40000	0	0	840000
1363028	0	700000	380000	380000	960000	0	0	0	1060000	780000	960000	0	0	1560000	0	960000	980000	0	0	0	620000	0	0	0	0	0	0	0	0	0	0	920000	0	0	1460000	0	0	1060000
1026621452	40000	1340000	1380000	2320000	140000	340000	120000	800000	1100000	720000	1460000	1140000	1260000	2340000	1300000	1660000	1180000	720000	960000	980000	1500000	1420000	820000	1440000	1460000	1400000	920000	40000	40000	820000	660000	100000	800000	1780000	0	680000	780000	1580000
11273382	160000	1100000	1080000	1860000	1160000	0	0	0	1320000	1000000	1320000	0	0	1980000	0	1340000	0	0	0	0	1000000	0	0	0	0	0	0	0	0	0	0	1300000	0	0	2000000	0	0	1460000
1029358230	300000	1480000	1400000	1800000	0	0	0	0	0	0	0	0	0	0	0	0	0	0	0	0	1480000	0	0	0	0	0	0	0	0	0	0	0	0	0	0	0	0	0
1017169156	260000	1540000	1520000	2640000	1320000	0	0	0	1940000	1180000	1500000	0	0	2700000	0	1880000	1560000	0	0	0	1800000	0	0	0	0	0	0	0	0	0	0	1440000	0	0	2600000	0	0	1860000
1023058882	280000	1360000	1380000	2220000	0	0	0	0	1620000	0	100000	0	0	2260000	0	1420000	0	0	0	0	1580000	0	0	0	0	0	0	0	0	0	0	0	0	0	0	0	0	0
1028403694	0	0	80000	0	0	0	0	0	0	0	0	0	0	0	0	0	0	0	0	0	20000	0	0	0	0	0	0	0	0	0	0	0	0	0	0	0	0	0
1074520	300000	1120000	1140000	1840000	0	0	0	0	1220000	0	0	0	0	1700000	0	1060000	0	0	0	0	1240000	0	0	0	0	0	0	0	0	0	0	0	0	0	0	0	0	0
1027922484	180000	940000	800000	1380000	740000	360000	420000	360000	880000	700000	840000	40000	960000	1300000	20000	860000	240000	580000	620000	400000	960000	1080000	720000	40000	20000	0	0	820000	1280000	660000	660000	820000	100000	1180000	1280000	500000	620000	900000
1015041474	260000	840000	1040000	1740000	60000	1920000	900000	60000	1340000	1200000	1560000	1760000	1920000	1620000	0	1440000	1460000	920000	1040000	0	1540000	1980000	1480000	0	0	0	0	0	0	1520000	1100000	1400000	1420000	1240000	2340000	780000	1100000	1720000
1025284942	0	600000	340000	0	0	0	0	0	0	0	0	0	0	0	0	0	0	0	0	0	780000	0	0	0	0	0	0	0	0	0	0	0	0	0	0	0	0	0
1017121615	0	0	780000	2340000	980000	0	0	0	1500000	1200000	1440000	0	0	2080000	0	1560000	1180000	0	0	0	0	500000	0	0	0	0	0	0	0	0	0	1020000	0	0	1940000	0	0	1460000
3700865	260000	1400000	1400000	2500000	0	1920000	0	0	1200000	0	1640000	0	0	1680000	0	1480000	0	0	0	0	1560000	0	0	0	0	0	0	0	0	1360000	0	0	560000	0	0	0	1320000	1620000
4990939	0	1440000	1520000	2340000	0	2040000	0	0	1980000	1200000	1480000	1700000	20000	2440000	0	1480000	0	0	0	0	1800000	2120000	0	0	0	0	0	0	0	1320000	1060000	160000	1320000	540000	2720000	900000	1060000	1760000
1026247371	0	1360000	1420000	2340000	0	2080000	740000	1200000	2080000	0	1480000	1680000	2460000	2300000	0	1520000	1260000	1000000	1060000	1980000	1560000	2000000	1240000	0	0	0	0	0	60000	1360000	1080000	0	1360000	2100000	0	860000	1400000	1120000
1028620860	260000	1600000	1640000	3000000	0	0	0	0	3240000	1500000	1620000	0	0	2600000	0	1740000	0	0	0	0	1840000	0	0	0	0	0	0	0	0	0	0	0	0	0	3000000	0	0	1760000
7290313	0	0	80000	60000	0	0	0	0	0	0	0	0	0	160000	0	0	0	0	0	0	20000	0	0	0	0	0	0	0	0	0	0	0	0	0	0	0	0	20000
1024358657	200000	1420000	20000	0	0	0	0	0	0	0	0	0	0	0	0	0	0	0	0	0	1180000	0	0	0	0	0	0	0	0	0	0	0	0	0	0	0	0	0
1023883215	0	900000	1160000	1520000	0	0	0	0	1200000	0	0	0	0	420000	0	1120000	0	0	0	0	1000000	0	0	0	0	0	0	0	0	0	0	0	0	0	0	0	0	0
1018632295	160000	880000	700000	2340000	0	0	0	0	1500000	1140000	1360000	0	0	1040000	0	1920000	0	0	0	0	1480000	0	0	0	0	0	0	0	0	0	0	0	0	0	240000	0	0	1060000
9226040	0	1360000	1600000	40000	700000	0	0	0	0	0	0	0	0	40000	0	0	0	0	0	0	1500000	0	0	0	0	0	0	0	0	0	0	900000	0	0	2160000	0	0	0
1026096610	0	0	1360000	2240000	0	0	0	0	0	0	0	0	0	0	0	300000	1520000	0	0	0	0	1920000	0	0	0	0	0	0	0	0	0	0	0	0	0	0	0	0
1028717388	180000	1400000	1380000	2240000	0	0	0	0	1560000	0	0	0	0	0	0	1660000	0	0	0	0	1480000	0	0	0	0	0	0	0	0	0	0	0	0	0	0	0	0	0
10781462	0	1080000	1340000	2140000	1380000	2740000	840000	1880000	1860000	1260000	2060000	1740000	2080000	2620000	0	2060000	1600000	1040000	1040000	2340000	60000	2480000	1340000	0	0	0	0	20000	2360000	1300000	1100000	1500000	1420000	2580000	2440000	960000	1480000	1780000
5672113	660000	1480000	740000	0	1240000	1940000	820000	1240000	1620000	980000	1080000	1680000	1620000	1620000	2040000	1480000	1500000	1000000	1040000	2020000	3160000	1960000	1240000	2300000	1000000	2420000	1460000	2460000	1500000	1260000	1080000	1360000	1280000	2180000	1260000	820000	1280000	620000
1019149523	240000	1400000	1100000	1780000	0	0	0	0	0	0	0	0	0	0	0	1060000	0	0	0	0	1680000	0	0	0	0	0	0	0	0	0	0	0	0	0	0	0	0	0
1032906594	260000	1400000	1440000	3160000	760000	0	0	0	1520000	1160000	1460000	0	0	2240000	0	1540000	0	0	0	0	1640000	0	0	0	0	0	0	0	0	0	0	1400000	0	0	2980000	0	0	3480000
1029136522	0	1020000	1000000	1700000	0	0	0	0	1100000	0	960000	0	0	1700000	0	1000000	0	0	0	0	0	0	0	0	0	0	0	0	0	0	0	0	0	0	0	0	0	1080000
1019176763	0	1520000	1420000	2300000	1480000	0	0	0	40000	1200000	40000	0	0	4100000	0	980000	1620000	0	0	0	1700000	1020000	0	0	0	0	0	0	0	0	0	1100000	0	0	2260000	0	0	0
1031364366	0	1000000	20000	0	0	0	0	0	0	0	0	0	0	0	0	0	0	0	0	0	1000000	0	0	0	0	0	0	0	0	0	0	0	0	0	0	0	0	0
1020478711	220000	1360000	1600000	2440000	0	0	0	0	0	0	0	0	0	0	0	260000	0	0	0	0	1760000	0	0	0	0	0	0	0	0	0	0	0	0	0	0	0	0	0
1030280386	0	1100000	1120000	0	0	0	0	0	0	0	0	0	0	0	0	0	0	0	0	0	480000	0	0	0	0	0	0	0	0	0	0	0	0	0	0	0	0	0
11682829	180000	1100000	1160000	1760000	1140000	1720000	740000	1260000	1380000	960000	1180000	1520000	1860000	1860000	1780000	1280000	1400000	1000000	1000000	1880000	1300000	1720000	980000	840000	1240000	700000	980000	1940000	1780000	1720000	880000	1120000	1280000	1920000	1680000	620000	2020000	1680000
1031559128	260000	1580000	1440000	980000	0	0	0	0	1540000	0	0	0	0	220000	0	1060000	0	0	0	0	1600000	0	0	0	0	0	0	0	0	0	0	0	0	0	0	0	0	0
1029405023	40000	1420000	1400000	2740000	1340000	1960000	780000	1200000	1640000	1180000	1660000	1760000	1980000	2400000	0	1460000	1500000	980000	1040000	280000	1640000	1480000	1180000	0	0	0	0	0	0	1460000	1060000	1500000	1400000	2360000	2220000	820000	140000	1600000
1027150406	0	0	20000	0	0	0	0	0	0	1140000	0	0	0	0	0	0	0	0	0	0	0	0	0	0	0	0	0	0	0	0	0	0	0	0	420000	0	0	0
1029901893	80000	1460000	440000	0	0	0	0	0	0	0	0	0	0	0	0	0	0	0	0	0	1320000	0	0	0	0	0	0	0	0	0	0	0	0	0	0	0	0	0
1028867776	0	0	1080000	2040000	0	0	0	0	1520000	0	0	0	0	60000	0	1480000	0	0	0	0	0	0	0	0	0	0	0	0	0	0	0	0	0	0	0	0	0	0
1014996509	240000	1360000	1400000	2260000	0	0	0	0	1520000	20000	1420000	0	0	2320000	0	1480000	0	0	0	0	1500000	0	0	0	0	0	0	0	0	0	0	0	0	0	0	0	0	1600000
1019742998	220000	920000	440000	0	1020000	0	0	0	800000	1000000	1040000	0	0	1940000	0	0	1220000	0	0	0	1200000	20000	0	0	0	0	0	0	0	0	0	660000	0	0	0	0	0	1200000
1028498352	260000	1080000	1100000	1820000	0	0	0	0	0	0	0	0	0	0	0	460000	0	0	0	0	1120000	0	0	0	0	0	0	0	0	0	0	0	0	0	0	0	0	0
1027496788	120000	1260000	80000	0	0	0	0	0	0	0	0	0	0	0	0	0	0	0	0	0	1600000	0	0	0	0	0	0	0	0	0	0	0	0	0	0	0	0	0
1019655995	160000	1560000	1380000	2040000	1240000	2320000	980000	980000	540000	1160000	1560000	1800000	1780000	2060000	0	1220000	1300000	1040000	1100000	2200000	1540000	2460000	1680000	0	0	0	0	0	1640000	1540000	1060000	1900000	1300000	2220000	1820000	840000	1600000	1840000
2853905	220000	1780000	1120000	2200000	0	0	0	0	1340000	1020000	1160000	0	0	2260000	0	1240000	0	0	0	0	1760000	0	0	0	0	0	0	0	0	0	0	0	0	0	660000	0	0	1560000
1030466417	0	1380000	1400000	1320000	0	0	0	0	0	1160000	1520000	0	0	2320000	0	0	0	0	0	0	1720000	0	0	0	0	0	0	0	0	0	0	260000	0	0	1200000	0	0	1880000
1026786819	300000	740000	700000	1140000	340000	980000	600000	940000	800000	380000	740000	900000	1120000	1260000	820000	760000	360000	780000	780000	1360000	980000	1060000	940000	720000	1320000	860000	1380000	1460000	1580000	1040000	740000	380000	1040000	880000	380000	660000	980000	860000
1026430943	160000	1020000	920000	1500000	1000000	1300000	400000	620000	1020000	800000	1040000	1140000	1300000	1620000	0	1120000	1220000	500000	600000	1120000	880000	1400000	660000	0	0	0	0	0	0	760000	660000	1180000	740000	1180000	1480000	500000	960000	1120000
1029582380	0	1360000	1380000	2240000	0	0	0	0	0	0	0	0	0	0	0	1020000	0	0	0	0	1720000	0	0	0	0	0	0	0	0	0	0	0	0	0	0	0	0	0
740155	180000	940000	920000	1440000	0	0	0	0	0	220000	880000	0	0	1300000	0	420000	0	0	0	0	1160000	0	0	0	0	0	0	0	0	0	0	0	0	0	0	0	0	980000
1019674772	260000	80000	80000	160000	100000	0	0	0	80000	1160000	1040000	0	0	1400000	0	1520000	60000	0	0	0	1580000	0	0	0	0	0	0	0	0	0	0	20000	0	0	260000	0	0	1260000
10814824	260000	1360000	1380000	20000	1280000	1920000	460000	680000	1500000	1160000	1460000	1680000	1700000	2260000	40000	1480000	0	980000	1040000	740000	2300000	1420000	1160000	1620000	1700000	0	1720000	2180000	1920000	1220000	40000	1400000	860000	1960000	2180000	0	1100000	1840000
1027666503	0	20000	20000	0	0	0	0	0	0	0	0	0	0	0	0	0	0	0	0	0	280000	0	0	0	0	0	0	0	0	0	0	0	0	0	0	0	0	0
1027766063	140000	1220000	20000	1060000	0	0	0	0	0	0	0	0	0	0	0	0	0	0	0	0	1060000	0	0	0	0	0	0	0	0	0	0	0	0	0	0	0	0	0
10367946	260000	820000	800000	1380000	0	0	0	0	900000	20000	900000	0	0	1300000	0	1020000	0	0	0	0	1100000	0	0	0	0	0	0	0	0	0	0	0	0	0	0	0	0	940000
1029582014	0	1100000	1280000	940000	0	0	0	0	0	0	0	0	0	0	0	0	0	0	0	0	1280000	0	0	0	0	0	0	0	0	0	0	0	0	0	0	0	0	0
1026417629	0	0	100000	60000	0	0	0	0	2560000	0	1440000	0	0	2740000	0	1960000	0	0	0	0	0	0	0	0	0	0	0	0	0	0	0	0	0	0	0	0	0	620000
11759625	60000	1280000	1400000	1840000	460000	260000	400000	580000	760000	600000	740000	160000	260000	1120000	20000	760000	440000	100000	220000	40000	820000	240000	460000	340000	220000	540000	880000	520000	620000	320000	200000	720000	20000	240000	760000	380000	240000	780000
1028278084	0	920000	780000	2240000	0	0	0	0	0	0	0	0	0	0	0	40000	0	0	0	0	1120000	0	0	0	0	0	0	0	0	0	0	0	0	0	0	0	0	0
1014392525	0	1060000	1100000	2000000	0	0	0	0	0	0	0	0	0	0	0	100000	0	0	0	0	0	0	0	0	0	0	0	0	0	0	0	0	0	0	0	0	0	0
1019354467	20000	1100000	1580000	2040000	0	0	0	0	380000	0	0	0	0	240000	0	1700000	0	0	0	0	60000	0	0	0	0	0	0	0	0	0	0	0	0	0	0	0	0	0
1025777296	260000	1240000	1120000	1880000	0	0	0	0	660000	0	0	0	0	0	0	1520000	0	0	0	0	1500000	0	0	0	0	0	0	0	0	0	0	0	0	0	0	0	0	0
1017974403	0	560000	20000	40000	0	0	0	0	0	0	0	0	0	0	0	100000	0	0	0	0	820000	0	0	0	0	0	0	0	0	0	0	0	0	0	0	0	0	0
1029177492	260000	1360000	1380000	900000	40000	0	0	0	1340000	1060000	720000	0	0	20000	0	280000	0	0	0	0	1860000	0	0	0	0	0	0	0	0	0	0	1660000	0	0	2180000	0	0	40000
1022510623	0	1600000	1400000	1840000	1240000	0	0	0	1540000	1180000	1440000	0	0	2280000	0	1500000	1540000	0	0	0	1240000	1140000	0	0	0	0	0	0	0	0	0	1440000	0	0	2200000	0	0	1580000
1029435611	260000	1480000	1380000	860000	0	0	0	0	0	0	0	0	0	0	0	0	0	0	0	0	1600000	0	0	0	0	0	0	0	0	0	0	0	0	0	0	0	0	0
1014879372	0	0	1260000	1540000	0	0	0	0	0	0	0	0	0	0	0	0	0	0	0	0	20000	0	0	0	0	0	0	0	0	0	0	0	0	0	0	0	0	0
1019137495	0	1640000	1040000	0	0	0	0	0	0	40000	1800000	0	0	3400000	0	0	0	0	0	0	2400000	0	0	0	0	0	0	0	0	0	0	0	0	0	0	0	0	1620000
1031286863	80000	1540000	840000	0	0	0	0	0	60000	0	0	0	0	0	0	1540000	0	0	0	0	1700000	0	0	0	0	0	0	0	0	0	0	0	0	0	0	0	0	0
1019446218	240000	1500000	1380000	620000	0	0	0	0	760000	0	0	0	0	1320000	0	180000	0	0	0	0	1400000	0	0	0	0	0	0	0	0	0	0	0	0	0	0	0	0	0
1029276342	80000	340000	360000	120000	0	2020000	840000	1220000	40000	1180000	1480000	3460000	3580000	280000	1960000	20000	80000	1400000	1080000	3160000	80000	460000	1200000	1560000	1720000	1160000	4080000	5940000	2600000	0	1060000	1520000	0	3980000	2240000	20000	1100000	2520000
1029939021	0	520000	620000	20000	0	0	0	0	0	0	0	0	0	0	0	0	0	0	0	0	460000	0	0	0	0	0	0	0	0	0	0	0	0	0	0	0	0	0
1020298798	0	1360000	1480000	100000	1420000	2160000	760000	600000	0	1380000	1480000	2000000	2220000	1980000	0	0	1520000	960000	1040000	40000	1500000	2100000	1160000	0	0	0	560000	2400000	2120000	0	0	560000	0	0	980000	0	1900000	560000
1031451313	0	1260000	1360000	1820000	0	0	0	0	1460000	0	1660000	0	0	1920000	0	1440000	0	0	0	0	1320000	0	0	0	0	0	0	0	0	0	0	0	0	0	0	0	0	1580000
1029557315	260000	1420000	1440000	2300000	0	280000	0	0	1560000	720000	1440000	1740000	2000000	2240000	0	1480000	0	0	0	0	1700000	1980000	0	0	0	0	0	0	0	0	0	720000	0	0	1500000	0	0	1240000
1023803588	240000	60000	40000	1080000	0	0	0	0	1440000	840000	1300000	0	0	1940000	0	980000	0	0	0	0	1600000	0	0	0	0	0	0	0	0	0	0	0	0	0	40000	0	0	1300000
1019115518	20000	1060000	1180000	1560000	1380000	1900000	700000	1200000	0	1480000	800000	620000	660000	1440000	1700000	440000	1540000	860000	1060000	1800000	700000	2000000	940000	1600000	0	2020000	1200000	1900000	1180000	1600000	1100000	1500000	2080000	2900000	2260000	880000	820000	780000
1028310384	240000	1380000	1420000	140000	0	0	0	0	0	0	0	0	0	0	0	0	0	0	0	0	1320000	0	0	0	0	0	0	0	0	0	0	0	0	0	0	0	0	0
1020837005	200000	980000	940000	1360000	0	0	0	0	760000	0	0	0	0	0	0	880000	0	0	0	0	1380000	0	0	0	0	0	0	0	0	0	0	0	0	0	0	0	0	0
1023263636	0	1060000	840000	0	0	0	0	0	0	0	0	0	0	0	0	0	0	0	0	0	1000000	0	0	0	0	0	0	0	0	0	0	0	0	0	0	0	0	0
1020018239	0	1180000	1040000	1700000	740000	2080000	1180000	1000000	0	1080000	1240000	1300000	1620000	1020000	0	380000	140000	820000	700000	1780000	1220000	0	960000	0	100000	0	1440000	2400000	1460000	1880000	880000	1260000	1000000	160000	1840000	660000	2260000	1260000
1028514636	20000	520000	1300000	100000	0	0	0	0	0	1200000	1440000	0	0	2140000	0	60000	0	0	0	0	40000	0	0	0	0	0	0	0	0	0	0	0	0	0	480000	0	0	1600000
1026529663	300000	1360000	20000	1680000	1240000	0	0	0	1560000	1160000	1440000	1200000	0	2360000	0	1540000	1500000	0	0	0	1620000	1980000	0	0	0	0	0	0	0	0	0	1400000	0	0	640000	0	0	20000
1029255552	0	1400000	1420000	1420000	0	0	0	0	0	0	0	0	0	0	0	0	0	0	0	0	1500000	0	0	0	0	0	0	0	0	0	0	0	0	0	0	0	0	0
1032689883	240000	1320000	1380000	2080000	20000	1900000	0	0	880000	1160000	1380000	1680000	1900000	40000	0	1480000	1040000	860000	1040000	0	1440000	1980000	1160000	0	0	0	0	0	0	1300000	1060000	1400000	1280000	2020000	2060000	840000	1260000	1600000
1019737112	0	1080000	920000	0	0	0	0	0	0	0	0	0	0	0	0	0	0	0	0	0	1580000	0	0	0	0	0	0	0	0	0	0	0	0	0	0	0	0	0
1014584764	240000	1660000	1500000	3260000	1500000	1040000	860000	1700000	3240000	1500000	1700000	2200000	2360000	2760000	0	1820000	2500000	1820000	1400000	2940000	2660000	2600000	1560000	0	0	0	0	0	800000	1740000	1600000	1700000	1540000	2300000	2440000	1440000	1720000	1840000
1016500469	260000	1160000	660000	0	0	0	0	0	0	0	0	0	0	0	0	0	0	0	0	0	1240000	0	0	0	0	0	0	0	0	0	0	0	0	0	0	0	0	0
1021514891	280000	1340000	1380000	2240000	0	0	0	0	0	0	0	0	0	0	0	460000	0	0	0	1140000	1500000	0	0	1000000	980000	380000	1000000	1260000	1100000	0	0	0	0	0	0	0	0	0
1031099643	0	1380000	1140000	1800000	1000000	2880000	660000	960000	100000	960000	1160000	1440000	1980000	1820000	0	1240000	1280000	780000	880000	1560000	1340000	2200000	2000000	0	1720000	0	1820000	2320000	2040000	2160000	2540000	1120000	2080000	3760000	1760000	1420000	2020000	1640000
1029598385	0	1460000	1580000	2220000	0	0	0	0	0	0	0	0	0	0	0	0	0	0	0	0	1500000	0	0	0	0	0	0	0	0	0	0	0	0	0	0	0	0	0
13002967	140000	1880000	1380000	840000	0	0	0	0	0	1000000	1660000	0	0	2540000	0	0	0	0	0	0	1560000	0	0	0	0	0	0	0	0	0	0	0	0	0	960000	0	0	1940000
1014211655	120000	20000	840000	1260000	1980000	2240000	20000	840000	0	1400000	1400000	8420000	5380000	2240000	940000	900000	4300000	20000	1080000	0	1580000	2780000	1160000	1460000	3480000	2400000	4620000	4760000	740000	700000	0	1480000	0	0	6280000	0	1600000	1440000
2229463	260000	2320000	1380000	280000	1060000	0	0	0	460000	0	1160000	1420000	0	1840000	0	1240000	1180000	0	0	0	1600000	1600000	0	0	0	0	0	0	0	0	0	1440000	0	0	1760000	0	0	1540000
1028882458	40000	760000	740000	0	0	0	0	0	0	0	0	0	0	0	0	0	0	0	0	0	1080000	0	0	0	0	0	0	0	0	0	0	0	0	0	0	0	0	0
3454130	320000	1460000	1460000	2580000	1060000	2000000	820000	900000	1860000	1380000	1740000	1800000	1800000	2660000	2320000	2200000	1420000	1120000	1300000	320000	2060000	2320000	1280000	2300000	1880000	2640000	1960000	2800000	2280000	1200000	960000	1000000	1260000	2340000	2660000	940000	1420000	1780000
1028731871	280000	920000	660000	200000	0	0	0	0	0	0	0	0	0	0	0	0	0	0	0	0	240000	0	0	0	0	0	0	0	0	0	0	0	0	0	0	0	0	0
1027825544	0	340000	1460000	2280000	0	0	0	0	2540000	0	0	0	0	0	2120000	2280000	0	0	0	0	0	0	0	2160000	2800000	2420000	1920000	2480000	0	0	0	0	0	0	0	0	0	0
1022069688	0	0	460000	440000	0	0	0	0	0	0	0	0	0	0	0	0	0	0	0	0	20000	0	0	0	0	0	0	0	0	0	0	0	0	0	0	0	0	0
1016252148	240000	1460000	1460000	2400000	0	0	0	0	1700000	0	0	0	0	0	0	1660000	0	0	0	0	1680000	0	0	0	0	0	0	0	0	0	0	0	0	0	0	0	0	0
1025252928	120000	1360000	1380000	1940000	0	0	0	0	1760000	0	0	0	0	0	0	1720000	0	0	0	0	1580000	0	0	0	0	0	0	0	0	0	0	0	0	0	0	0	0	0
1030512107	0	720000	720000	1400000	0	0	0	0	40000	0	0	0	0	0	0	900000	0	0	0	0	40000	0	0	0	0	0	0	0	0	0	0	0	0	0	0	0	0	0
1029236856	120000	1360000	40000	0	0	0	0	0	0	0	0	0	0	0	0	0	0	0	0	0	1500000	0	0	0	0	0	0	0	0	0	0	0	0	0	0	0	0	0
1027830212	260000	1460000	1380000	1960000	0	0	0	0	0	0	0	0	0	0	0	0	0	0	0	0	1060000	0	0	0	0	0	0	0	0	0	0	0	0	0	0	0	0	0
1029120498	0	940000	920000	1500000	0	0	0	0	1060000	0	960000	0	0	1500000	0	1000000	0	0	0	0	860000	0	0	0	0	0	0	0	0	0	0	0	0	0	0	0	0	1060000
1025037004	140000	300000	140000	140000	0	0	0	0	60000	0	0	0	0	0	0	620000	0	0	0	0	1880000	0	0	0	0	0	0	0	0	0	0	0	0	0	0	0	0	0
1030156437	160000	920000	1480000	1500000	20000	0	0	0	40000	20000	20000	0	0	20000	0	40000	200000	0	0	0	1120000	20000	0	0	0	0	0	0	0	0	0	60000	0	0	60000	0	0	20000
1019762486	0	1140000	1080000	0	0	0	0	0	0	0	0	0	0	0	0	0	0	0	0	0	280000	0	0	0	0	0	0	0	0	0	0	0	0	0	0	0	0	0
1019549856	260000	1300000	880000	20000	0	0	0	0	0	0	0	0	0	0	0	700000	0	0	0	0	1520000	0	0	0	0	0	0	0	0	0	0	0	0	0	0	0	0	0
4550707	0	1760000	540000	0	0	0	0	0	0	0	0	0	0	0	0	0	0	0	0	0	0	0	0	0	0	0	0	0	0	0	0	0	0	0	0	0	0	0
1028403378	0	1700000	1040000	0	0	0	0	0	0	0	0	0	0	0	0	20000	0	0	0	0	60000	0	0	0	0	0	0	0	0	0	0	0	0	0	0	0	0	0
5322859	0	1400000	1660000	2280000	1220000	0	940000	1380000	1520000	840000	1620000	1680000	1660000	2260000	1360000	1540000	1520000	0	0	2440000	0	2080000	0	0	1700000	2060000	0	0	1880000	0	0	0	0	0	0	0	0	1760000
1029642808	420000	1360000	1100000	1880000	1240000	660000	0	0	1360000	720000	1480000	1700000	1920000	2360000	0	1280000	1720000	0	0	0	1600000	2020000	0	0	0	0	0	0	0	0	0	1460000	0	0	1840000	0	0	1800000
1019109908	240000	2480000	40000	40000	0	0	0	0	0	0	0	0	0	0	0	120000	0	0	0	0	1380000	0	0	0	0	0	0	0	0	0	0	0	0	0	0	0	0	0
1020210127	100000	1260000	1100000	2060000	1540000	720000	640000	160000	1560000	0	1720000	1320000	20000	2460000	0	1440000	1560000	740000	660000	0	740000	200000	1020000	0	0	0	0	0	0	1140000	1020000	1400000	920000	2140000	1440000	520000	1380000	0
1028834581	280000	2140000	1660000	2240000	0	0	0	0	360000	1140000	0	0	0	2220000	0	1520000	0	0	0	0	1700000	0	0	0	0	0	0	0	0	0	0	980000	0	0	2200000	0	0	0
11646307	0	1320000	1220000	40000	1100000	0	0	0	0	1000000	2020000	1600000	440000	2280000	0	0	1040000	0	0	0	1340000	1080000	0	0	0	0	0	0	0	0	0	1160000	0	0	1720000	0	0	1740000
1029720724	0	1940000	800000	0	0	0	0	0	0	0	0	0	0	0	0	0	0	0	0	0	1980000	0	0	0	0	0	0	0	0	0	0	0	0	0	0	0	0	0
1021541750	0	560000	2460000	2560000	0	0	0	0	1580000	540000	1500000	0	0	2300000	0	1600000	0	0	0	0	120000	0	0	0	0	0	0	0	0	0	0	0	0	0	0	0	0	1600000
2292388	240000	1380000	1420000	1880000	1240000	0	0	0	2040000	1120000	1780000	0	0	2040000	0	1580000	1020000	0	0	0	1740000	0	0	0	0	0	0	0	0	0	0	480000	0	0	1940000	0	0	1540000
1709034	320000	1380000	1460000	2720000	0	0	0	0	1980000	0	0	0	0	0	0	1900000	0	0	0	0	1660000	0	0	0	0	0	0	0	0	0	0	0	0	0	0	0	0	0
1029692788	260000	1420000	1380000	1860000	0	0	0	0	0	0	0	0	0	0	0	0	0	0	0	0	1540000	0	0	0	0	0	0	0	0	0	0	0	0	0	0	0	0	0
1018566694	220000	1100000	1120000	1800000	1000000	0	0	0	0	0	0	20000	0	0	0	0	1180000	0	0	0	1200000	40000	0	0	0	0	0	0	0	0	80000	1160000	0	20000	20000	40000	0	0
1032548070	20000	1360000	1440000	2200000	0	0	0	0	1500000	0	0	0	0	1880000	0	1540000	0	0	0	0	0	0	0	0	0	0	0	0	0	0	0	0	0	0	0	0	0	0
11920676	0	1400000	1380000	2080000	0	0	0	0	1560000	1080000	3000000	0	0	4580000	0	1500000	0	0	0	0	1580000	0	0	0	0	0	0	0	0	0	0	0	0	0	0	0	0	2120000
1029888378	0	620000	660000	1240000	840000	0	0	0	840000	780000	840000	0	0	1340000	0	840000	1000000	0	0	0	1000000	0	0	0	0	0	0	0	0	0	0	920000	0	0	1460000	0	0	980000
1014845265	0	100000	20000	0	0	0	0	0	0	0	540000	0	0	2540000	0	0	0	0	0	0	60000	0	0	0	0	0	0	0	0	0	0	0	0	0	0	0	0	0
1030036801	220000	1240000	1160000	1520000	0	0	0	0	20000	0	0	0	0	0	0	1180000	0	0	0	0	1260000	0	0	0	0	0	0	0	0	0	0	0	0	0	0	0	0	0
1027735865	0	100000	1060000	80000	0	0	0	0	0	0	0	0	0	0	0	0	0	0	0	0	300000	0	0	0	0	0	0	0	0	0	0	0	0	0	0	0	0	0
1019373310	280000	0	1100000	1800000	0	0	0	0	1200000	440000	0	0	0	60000	0	1240000	0	0	0	0	360000	0	0	0	0	0	0	0	0	0	0	0	0	0	0	0	0	0
1026499708	0	240000	80000	0	0	1940000	0	0	0	0	0	1800000	1880000	0	2120000	0	0	0	0	0	0	1480000	0	1980000	1520000	2300000	1780000	0	0	0	0	0	0	0	0	260000	1320000	0
1029561617	60000	1360000	20000	0	0	0	0	0	0	0	0	0	0	0	0	0	0	0	0	0	1480000	0	0	0	0	0	0	0	0	0	0	0	0	0	0	0	0	0
1029742999	280000	1220000	1260000	2060000	1020000	1560000	640000	1100000	1440000	920000	1160000	1420000	1520000	1920000	0	1400000	1200000	840000	800000	1660000	1340000	1700000	920000	0	1400000	0	1540000	1840000	1640000	1060000	880000	1180000	1080000	1680000	1320000	720000	1080000	1380000
1018838618	260000	1480000	1520000	620000	0	0	0	0	0	0	0	0	0	0	0	0	0	0	0	0	1760000	0	0	0	0	0	0	0	0	0	0	0	0	0	0	0	0	0
10844968	0	1360000	1400000	2340000	0	0	0	0	40000	0	0	0	0	0	0	0	0	0	0	0	1480000	0	0	0	0	0	0	0	0	0	0	0	0	0	0	0	0	0
12129683	180000	0	920000	1560000	840000	1300000	60000	0	1160000	780000	0	1320000	1300000	1020000	0	1300000	1040000	800000	880000	0	20000	1340000	840000	0	0	0	0	0	0	840000	860000	960000	1040000	1620000	1460000	760000	660000	0
1029521459	40000	940000	880000	1560000	0	0	0	0	1020000	0	920000	0	0	1580000	0	960000	0	0	0	0	940000	0	0	0	0	0	0	0	0	0	0	0	0	0	0	0	0	1020000
12985993	180000	1020000	1160000	1920000	960000	1480000	560000	880000	1280000	900000	1080000	1260000	1280000	1620000	0	1440000	1020000	280000	440000	1720000	1160000	1360000	620000	0	0	0	0	0	0	880000	780000	1040000	1260000	1400000	1520000	640000	960000	1200000
1018952570	60000	800000	760000	1460000	0	0	0	0	600000	0	0	0	0	40000	0	600000	0	0	0	0	340000	0	0	0	0	0	0	0	0	0	0	0	0	0	0	0	0	0
1018594855	180000	1480000	1420000	2560000	0	0	0	0	0	0	0	0	0	0	0	700000	0	0	0	0	1520000	0	0	0	0	0	0	0	0	0	0	0	0	0	0	0	0	0
1031204678	0	1300000	1120000	0	0	0	0	0	0	0	0	0	0	0	0	0	0	0	0	0	60000	0	0	0	0	0	0	0	0	0	0	0	0	0	0	0	0	0
1029460868	0	1240000	1300000	660000	0	0	0	0	0	0	0	0	0	0	0	0	0	0	0	0	1260000	0	0	0	0	0	0	0	0	0	0	0	0	0	0	0	0	0
1023209522	160000	880000	1280000	1240000	0	0	0	0	0	0	0	0	0	0	0	420000	0	0	0	0	1260000	0	0	0	0	0	0	0	0	0	0	0	0	0	0	0	0	0
1028897179	240000	1460000	1420000	2300000	0	0	0	0	1560000	0	1760000	0	0	2480000	0	1300000	0	0	0	0	1480000	0	0	0	0	0	0	0	0	0	0	0	0	0	0	0	0	1880000
1028080661	380000	1500000	1460000	2320000	0	0	0	0	1560000	0	0	0	0	0	0	1480000	0	0	0	0	1760000	0	0	0	0	0	0	0	0	0	0	0	0	0	0	0	0	0
1018777209	120000	1360000	1380000	0	0	0	0	0	0	0	0	0	0	0	0	0	0	0	0	0	1440000	0	0	0	0	0	0	0	0	0	0	0	0	0	0	0	0	0
1023802103	280000	1280000	440000	1000000	0	0	0	0	0	0	0	0	0	0	0	0	0	0	0	0	1320000	0	0	0	0	0	0	0	0	0	0	0	0	0	0	0	0	0
1029521462	0	1380000	1400000	2260000	0	0	0	0	1560000	0	0	0	0	0	0	1500000	0	0	0	0	1500000	0	0	0	0	0	0	0	0	0	0	0	0	0	0	0	0	0
4680271	260000	1460000	1600000	2280000	0	0	0	0	20000	0	0	0	0	0	0	1480000	0	0	0	0	1500000	0	0	0	0	0	0	0	0	0	0	0	0	0	0	0	0	0
11622994	240000	1400000	1240000	20000	0	0	0	0	0	0	0	0	0	0	0	0	0	0	0	0	1340000	0	0	0	0	0	0	0	0	0	0	0	0	0	0	0	0	0
11416069	240000	700000	620000	1120000	40000	40000	60000	60000	780000	40000	740000	40000	0	1140000	40000	700000	80000	60000	40000	40000	880000	20000	80000	20000	100000	20000	20000	40000	80000	200000	80000	40000	220000	40000	40000	240000	40000	760000
1029206529	180000	900000	820000	0	0	0	0	0	0	0	0	0	0	0	0	0	0	0	0	0	1040000	0	0	0	0	0	0	0	0	0	0	0	0	0	0	0	0	0
1029770686	0	0	320000	1160000	0	0	0	0	0	0	0	0	0	0	0	0	0	0	0	0	0	0	0	0	0	0	0	0	0	0	0	40000	0	0	300000	0	0	0
1029026620	60000	840000	920000	1600000	0	0	0	0	760000	0	0	0	0	20000	0	540000	0	0	0	0	1100000	0	0	0	0	0	0	0	0	0	0	0	0	0	0	0	0	0
1029487751	240000	1680000	2280000	1480000	0	0	0	0	0	0	0	0	0	0	0	180000	0	0	0	0	1300000	0	0	0	0	0	0	0	0	0	0	0	0	0	0	0	0	0
1027776932	0	720000	920000	2160000	0	0	0	0	1520000	0	0	0	0	1860000	0	1500000	0	0	0	0	20000	0	0	0	0	0	0	0	0	0	0	0	0	0	0	0	0	0
1021240446	260000	1200000	1060000	1560000	0	0	0	0	580000	0	0	0	0	0	0	960000	0	0	0	0	1180000	0	0	0	0	0	0	0	0	0	0	0	0	0	0	0	0	0
2240842	260000	1400000	1400000	2300000	1220000	1940000	780000	1300000	480000	1160000	1420000	1680000	1880000	2420000	1960000	1560000	1480000	1000000	1040000	2280000	1600000	2020000	1200000	2100000	1720000	2460000	1800000	2340000	2040000	1660000	1080000	1400000	1300000	2020000	2200000	840000	1260000	1320000
1021678025	300000	1360000	1380000	2240000	0	0	280000	0	1520000	0	180000	0	0	100000	0	1480000	0	980000	1040000	0	380000	40000	1160000	0	0	0	0	0	0	1520000	1060000	0	1280000	2060000	0	840000	1320000	0
1020674154	0	2740000	460000	0	0	0	0	0	0	0	0	0	0	0	0	0	0	0	0	0	1520000	0	0	0	0	0	0	0	0	0	0	0	0	0	0	0	0	0
1021614140	0	1540000	1380000	2500000	0	0	0	0	0	0	0	0	0	0	0	80000	0	0	0	0	1580000	0	0	0	0	0	0	0	0	0	0	0	0	0	0	0	0	0
1024957624	260000	1120000	1240000	1800000	0	0	0	0	180000	0	980000	0	0	1780000	0	1280000	0	0	0	0	1480000	0	0	0	0	0	0	0	0	0	0	0	0	0	0	0	0	1160000
1028417124	180000	920000	940000	1520000	0	0	0	0	460000	0	1220000	0	0	2240000	0	940000	0	0	0	0	1000000	0	0	0	0	0	0	0	0	0	0	0	0	0	0	0	0	0
1018778037	200000	1180000	1160000	1660000	0	1540000	540000	840000	1200000	820000	900000	1340000	1580000	1420000	40000	1120000	1200000	740000	720000	1600000	1300000	20000	800000	1560000	1400000	1740000	540000	800000	20000	1000000	760000	0	860000	1360000	1080000	580000	480000	1240000
8271761	20000	1120000	1160000	1820000	0	0	0	0	0	0	0	0	0	0	0	0	0	0	0	0	660000	0	0	0	0	0	0	0	0	0	0	0	0	0	0	0	0	0
9734207	180000	320000	180000	20000	0	0	0	0	0	0	300000	0	0	1520000	0	0	0	0	0	0	960000	0	0	0	0	0	0	0	0	0	0	0	0	0	0	0	0	0
3041536	20000	0	400000	0	0	0	0	0	0	0	0	0	0	0	0	0	0	0	0	0	80000	0	0	0	0	0	0	0	0	0	0	0	0	0	0	0	0	0
1017703861	140000	700000	740000	1140000	660000	980000	400000	620000	780000	600000	640000	860000	960000	880000	0	760000	780000	500000	540000	1120000	800000	1000000	620000	0	880000	0	1420000	2740000	1120000	660000	540000	720000	660000	1060000	1100000	440000	680000	760000
2404176	100000	920000	960000	1520000	0	0	0	0	200000	780000	620000	0	0	2220000	0	1200000	0	0	0	0	780000	0	0	0	0	0	0	0	0	0	0	0	0	0	1360000	0	0	1140000
8014713	0	1460000	1980000	1880000	0	0	0	0	1620000	1080000	1440000	0	0	2440000	0	1440000	0	0	0	0	360000	0	0	0	0	0	0	0	0	0	0	0	0	0	280000	0	0	1640000
1028021147	260000	2000000	1380000	2480000	0	0	0	0	1520000	0	0	0	0	20000	0	1420000	0	0	0	0	1480000	0	0	0	0	0	0	0	0	0	0	0	0	0	0	0	0	0
1026925373	20000	200000	60000	0	0	0	0	0	0	0	0	0	0	0	0	0	0	0	0	0	20000	0	0	0	0	0	0	0	0	0	0	0	0	0	0	0	0	0
1029014014	320000	1340000	1380000	2020000	0	0	0	0	920000	1200000	1440000	0	0	2300000	0	1340000	0	0	0	0	1500000	0	0	0	0	0	0	0	0	0	0	0	0	0	500000	0	0	1580000
1020492633	320000	1400000	1320000	0	0	0	0	0	0	0	0	0	0	0	0	0	0	0	0	0	1500000	0	0	0	0	0	0	0	0	0	0	0	0	0	0	0	0	0
1018248101	80000	1360000	1360000	980000	0	0	0	0	180000	0	1240000	0	0	920000	0	1180000	0	0	0	0	1340000	0	0	0	0	0	0	0	0	0	0	0	0	0	0	0	0	0
12559251	200000	800000	1280000	0	0	0	0	0	0	0	0	0	0	0	0	0	0	0	0	0	920000	0	0	0	0	0	0	0	0	0	0	0	0	0	0	0	0	0
1029432506	140000	1360000	1400000	1140000	0	0	0	0	0	0	0	0	0	0	0	0	0	0	0	0	1560000	0	0	0	0	0	0	0	0	0	0	0	0	0	0	0	0	0
1024245136	20000	1440000	1560000	2140000	1280000	0	0	0	720000	860000	1900000	0	0	3360000	0	1040000	1560000	0	0	0	1380000	20000	0	0	0	0	0	0	0	0	0	1480000	0	0	1740000	0	40000	260000
1017472091	0	920000	40000	0	0	0	0	0	0	0	0	0	0	0	0	0	0	0	0	0	1040000	0	0	0	0	0	0	0	0	0	0	0	0	0	0	0	0	0
1029359333	180000	1100000	900000	1880000	0	0	0	0	160000	0	0	0	0	0	0	580000	0	0	0	0	1180000	0	0	0	0	0	0	0	0	0	0	0	0	0	0	0	0	0
1019276671	0	1400000	1380000	2220000	0	300000	620000	960000	1060000	1160000	1440000	260000	100000	2240000	1960000	1480000	40000	780000	840000	1920000	1500000	400000	940000	1960000	1820000	2420000	1860000	2340000	2040000	1300000	1080000	0	1280000	1700000	1960000	880000	1280000	1580000
1024272886	0	1680000	1520000	2260000	0	40000	0	0	1640000	1160000	1100000	0	0	2260000	0	1480000	0	0	0	0	40000	0	0	0	0	0	0	0	0	0	0	0	0	0	1460000	0	0	0
1960727	180000	920000	40000	0	0	0	0	0	0	0	0	0	0	0	0	0	0	0	0	0	1040000	0	0	0	0	0	0	0	0	0	0	0	0	0	0	0	0	0
12556029	0	1320000	1300000	2160000	0	0	0	0	0	0	0	0	0	0	0	40000	0	0	0	0	1020000	0	0	0	0	0	0	0	0	0	0	0	0	0	0	0	0	0
1029976572	0	280000	1560000	2240000	0	0	0	0	0	0	0	0	0	0	0	60000	0	0	0	0	0	0	0	0	0	0	0	0	0	0	0	0	0	0	0	0	0	0
1031044386	0	1100000	40000	0	0	0	0	0	0	0	0	0	0	0	0	0	0	0	0	0	1140000	0	0	0	0	0	0	0	0	0	0	0	0	0	0	0	0	0
1028552795	260000	1360000	1560000	1400000	1240000	1900000	20000	1180000	360000	0	1480000	1840000	1940000	2460000	0	760000	1500000	980000	1040000	2280000	1580000	2020000	1160000	0	0	0	0	0	180000	1300000	1060000	1360000	1280000	2020000	0	840000	1280000	1520000
1029258474	240000	920000	1100000	1580000	900000	1320000	560000	820000	420000	820000	720000	1140000	1280000	860000	1340000	960000	1020000	680000	700000	1540000	1060000	1300000	0	1300000	440000	1620000	780000	1520000	1320000	940000	1500000	940000	1820000	680000	1440000	1280000	880000	800000
1430677	0	1600000	40000	0	0	0	0	0	0	0	0	0	0	0	0	0	0	0	0	0	1380000	0	0	0	0	0	0	0	0	0	0	0	0	0	0	0	0	0
1029307860	260000	1280000	1380000	2180000	1340000	1980000	800000	200000	1560000	1180000	1780000	1560000	1900000	2320000	0	1460000	1460000	960000	1080000	0	1160000	2000000	1200000	0	0	0	0	0	0	0	0	1440000	0	2040000	2120000	0	460000	1780000
1023962300	0	340000	40000	0	0	0	0	0	0	0	0	0	0	0	0	0	0	0	0	0	20000	0	0	0	0	0	0	0	0	0	0	0	0	0	0	0	0	0
6612380	200000	1200000	420000	40000	0	0	0	0	100000	0	0	0	0	0	0	40000	0	0	0	0	80000	0	0	0	0	0	0	0	0	0	0	0	0	0	740000	0	0	0
1027090760	160000	1000000	900000	1300000	840000	2020000	560000	820000	560000	780000	820000	1140000	1460000	1120000	0	740000	1020000	760000	700000	1460000	1440000	1320000	800000	20000	1160000	0	1260000	1580000	1400000	920000	720000	940000	860000	1380000	1480000	580000	920000	1040000
4069287	180000	800000	860000	140000	0	0	0	0	660000	0	0	0	0	20000	0	560000	0	0	0	0	940000	0	0	0	0	0	0	0	0	0	0	0	0	0	0	0	0	0
1028583746	0	0	120000	600000	0	0	0	0	0	0	0	0	0	0	0	0	0	0	0	0	0	0	0	0	0	0	0	0	0	0	0	0	0	0	0	0	0	0
1022246106	60000	1560000	1340000	2280000	1320000	2020000	900000	1220000	1520000	1280000	1780000	1860000	1980000	2520000	20000	1660000	1440000	0	0	2260000	500000	2460000	0	0	2640000	2300000	1900000	2900000	0	1560000	1180000	1740000	1300000	1140000	2380000	840000	1420000	1840000
1028695205	140000	1380000	1380000	2260000	0	0	0	0	700000	0	1100000	0	0	2020000	0	1460000	0	0	0	0	1500000	0	0	0	0	0	0	0	0	0	0	0	0	0	0	0	0	0
1032020666	300000	1980000	1380000	2780000	0	0	0	0	2220000	0	0	20000	0	140000	0	1960000	380000	0	0	0	2020000	1400000	0	0	0	0	0	0	0	40000	0	0	0	0	0	0	0	0
1030135566	0	880000	880000	1460000	0	0	0	0	0	0	0	0	0	0	0	80000	0	0	0	0	1080000	0	0	0	0	0	0	0	0	0	0	0	0	0	0	0	0	0
11746098	120000	1500000	1380000	2260000	1280000	0	0	0	0	1180000	1480000	0	0	460000	0	940000	1480000	0	0	0	1540000	0	0	0	0	0	0	0	0	0	0	1400000	0	0	2140000	0	0	1720000
1028494635	180000	560000	780000	180000	0	0	0	0	0	660000	0	0	0	0	0	0	0	0	0	0	700000	0	0	0	0	0	0	0	0	0	0	0	0	0	1220000	0	0	0
1020677502	160000	920000	1080000	1560000	0	0	0	0	760000	0	0	0	0	0	0	700000	0	0	0	0	1180000	0	0	0	0	0	0	0	0	0	0	0	0	0	0	0	0	0
1031640517	260000	340000	20000	0	0	0	0	0	0	0	0	0	0	0	0	0	0	0	0	0	320000	0	0	0	0	0	0	0	0	0	0	0	0	0	0	0	0	0
1031529463	140000	1340000	1080000	2200000	0	0	0	0	1540000	0	1440000	0	0	2220000	0	1540000	0	0	0	0	1460000	0	0	0	0	0	0	0	0	0	0	0	0	0	0	0	0	20000
1024896178	260000	1420000	1400000	1920000	0	0	0	0	1520000	0	40000	0	0	2260000	0	1300000	0	0	0	0	1520000	0	0	0	0	0	0	0	0	0	0	0	0	0	0	0	0	0
1029784807	220000	1420000	1440000	2360000	0	0	0	0	1920000	1000000	1240000	0	0	1900000	0	820000	0	0	0	0	1640000	0	0	0	0	0	0	0	0	0	0	0	0	0	0	0	0	1320000
1029306537	0	0	20000	60000	1260000	2060000	1000000	1400000	1580000	1300000	1480000	1340000	1480000	1140000	1120000	0	1420000	1060000	1120000	1900000	0	1960000	1280000	2220000	20000	1720000	1920000	1240000	1620000	1320000	1260000	1460000	1300000	2060000	2240000	900000	1300000	1760000
1027794503	0	2820000	3140000	2240000	0	0	0	0	0	0	0	0	0	0	0	640000	0	0	0	0	1460000	0	0	0	0	0	0	0	0	0	0	0	0	0	0	0	0	0
1028649239	0	900000	1220000	1800000	0	0	0	0	1360000	0	0	0	0	0	0	1280000	0	0	0	0	620000	0	0	0	0	0	0	0	0	0	0	0	0	0	0	0	0	0
1020106646	0	1040000	280000	0	0	0	0	0	0	0	0	0	0	0	0	0	0	0	0	0	1180000	0	0	0	0	0	0	0	0	0	0	0	0	0	0	0	0	0
1024286056	260000	300000	1420000	1120000	100000	400000	80000	20000	0	740000	1380000	560000	280000	2160000	20000	460000	400000	300000	20000	40000	1540000	2200000	460000	360000	0	20000	20000	20000	300000	1300000	100000	480000	760000	20000	980000	760000	680000	760000
1020819104	140000	700000	1300000	1360000	1080000	1200000	0	0	1020000	300000	320000	1160000	1260000	900000	0	1000000	760000	0	0	0	800000	720000	0	0	0	0	0	0	0	0	0	600000	0	0	1060000	0	60000	260000
1021091590	260000	1380000	1400000	2500000	0	0	0	0	1600000	940000	0	0	0	40000	0	1520000	0	0	0	0	1600000	0	0	0	0	0	0	0	0	0	0	0	0	0	1080000	0	0	0
1021253976	340000	1340000	2760000	4420000	1240000	1900000	1460000	1180000	2060000	2020000	2860000	1660000	1880000	3900000	1980000	2920000	1440000	1920000	2040000	2180000	2080000	1960000	2280000	2120000	200000	2880000	0	0	1400000	1280000	1060000	1920000	1320000	2480000	2100000	860000	1460000	3320000
1016479554	0	0	380000	20000	0	0	0	0	0	0	60000	0	0	2260000	0	0	0	0	0	0	0	0	0	0	0	0	0	0	0	0	0	0	0	0	0	0	0	0
1031127894	0	2640000	1420000	2140000	0	0	0	0	0	0	0	0	0	0	0	160000	0	0	0	0	1640000	0	0	0	0	0	0	0	0	0	0	0	0	0	0	0	0	0
1822478	280000	700000	800000	1460000	680000	1040000	0	0	880000	760000	980000	900000	1480000	2320000	0	1200000	780000	0	0	0	1380000	1040000	0	0	0	0	0	0	0	1100000	0	720000	0	0	1140000	0	680000	1260000
1023059835	340000	820000	1100000	0	0	0	0	0	0	0	0	0	0	0	0	0	0	0	0	0	1600000	0	0	0	0	0	0	0	0	0	0	0	0	0	0	0	0	0
1021964106	300000	0	360000	0	0	0	0	0	0	0	0	0	0	0	0	0	0	0	0	0	360000	0	0	0	0	0	0	0	0	0	0	0	0	0	0	0	0	0
1017921009	300000	1100000	600000	0	0	0	0	0	0	0	0	0	0	0	0	0	0	0	0	0	1340000	0	0	0	0	0	0	0	0	0	0	0	0	0	0	0	0	0
1026808674	260000	1360000	1400000	2280000	1240000	2240000	780000	1220000	1240000	1220000	1480000	1740000	1960000	2300000	2380000	1620000	1500000	1040000	1040000	1500000	1520000	3160000	1160000	2160000	1740000	2400000	1640000	2380000	1960000	1400000	1120000	1560000	1280000	2040000	2080000	1160000	1300000	1760000
3447375	220000	980000	1360000	1100000	1020000	0	0	0	1020000	1580000	2140000	0	0	3100000	0	600000	920000	0	0	0	1040000	0	0	0	0	0	0	0	0	0	0	1120000	0	0	1720000	0	0	2080000
1029570966	220000	1120000	1100000	1800000	860000	1280000	420000	500000	1280000	800000	1480000	1200000	1400000	2220000	0	1460000	1320000	580000	560000	980000	1440000	1380000	640000	0	1080000	0	1060000	1360000	1320000	0	0	1460000	0	960000	1620000	0	0	980000
1029593277	240000	1540000	1420000	2240000	0	0	0	0	0	1180000	1380000	0	0	2080000	0	20000	0	0	0	0	1560000	0	0	0	0	0	0	0	0	0	0	1400000	0	0	2120000	0	0	1140000
1020395348	120000	1540000	20000	0	0	0	0	0	0	0	0	0	0	0	0	0	0	0	0	0	1460000	0	0	0	0	0	0	0	0	0	0	0	0	0	0	0	0	0
1014262122	220000	900000	740000	1080000	0	0	0	0	740000	0	0	0	0	0	0	740000	0	0	0	0	1000000	0	0	0	0	0	0	0	0	0	0	0	0	0	0	0	0	0
1026163066	0	320000	500000	1960000	1280000	3140000	1420000	1540000	1540000	1180000	1460000	1680000	1960000	2700000	2040000	1500000	1480000	1620000	1940000	2300000	440000	2020000	2280000	1540000	380000	2400000	1860000	2360000	2060000	1320000	1060000	1620000	1300000	2040000	2220000	840000	1320000	1600000
5433338	340000	1380000	1360000	2260000	920000	1940000	840000	1180000	1560000	1160000	1520000	1660000	1860000	2320000	0	1480000	1240000	980000	1040000	2180000	2040000	2000000	1200000	0	0	0	0	0	40000	1300000	1080000	1000000	1280000	2060000	2160000	840000	1300000	1600000
1021079885	260000	20000	200000	20000	0	0	0	0	0	0	0	0	0	0	0	0	0	0	0	0	1160000	0	0	0	0	0	0	0	0	0	0	0	0	0	0	0	0	0
1025031056	160000	960000	740000	1280000	0	0	0	0	0	0	0	0	0	0	0	420000	0	0	0	0	1020000	0	0	0	0	0	0	0	0	0	0	0	0	0	0	0	0	0
1017675866	300000	700000	1380000	2040000	1220000	0	0	0	0	0	0	1680000	1880000	0	20000	500000	1480000	0	0	0	20000	2000000	1160000	2100000	0	0	0	0	700000	1300000	1060000	0	1280000	0	0	840000	1320000	0
1032720558	260000	1340000	1740000	700000	0	0	0	0	0	0	0	0	0	3200000	0	0	0	0	0	0	1500000	0	0	0	0	0	0	0	0	0	0	0	1280000	0	0	0	0	0
1021829945	140000	960000	1320000	1520000	0	0	0	0	1300000	0	720000	0	0	1180000	0	880000	0	0	0	0	840000	0	0	0	0	0	0	0	0	0	0	0	0	0	0	0	0	0
12374642	100000	1360000	560000	0	0	0	0	0	0	0	0	0	0	0	0	0	0	0	0	0	1500000	0	0	0	0	0	0	0	0	0	0	0	0	0	0	0	0	0
7821368	240000	1120000	880000	0	0	0	0	0	0	0	0	0	0	0	0	0	0	0	0	0	1220000	0	0	0	0	0	0	0	0	0	0	0	0	0	0	0	0	0
1022451516	220000	1520000	1540000	2400000	0	0	0	0	1220000	1140000	1220000	0	0	1820000	0	1500000	0	0	0	0	1620000	0	0	0	0	0	0	0	0	0	0	40000	0	0	1820000	0	0	1420000
8207028	220000	1360000	1380000	2240000	0	0	0	0	1520000	0	0	0	0	1660000	0	1340000	0	0	0	0	1500000	0	0	0	0	0	0	0	0	0	0	0	0	0	0	0	0	0
1018688386	100000	1220000	1400000	2320000	1280000	1520000	840000	1260000	1280000	1160000	1500000	1240000	1200000	2080000	2060000	1360000	1600000	1000000	740000	3680000	1040000	2440000	600000	2160000	1720000	2940000	1880000	2700000	4220000	1340000	1100000	1460000	1280000	2320000	2220000	900000	1900000	1840000
1026188539	240000	1420000	1580000	60000	0	0	0	0	0	0	1560000	0	0	2220000	0	0	0	0	0	0	1980000	0	0	0	0	0	0	0	0	0	0	0	0	0	0	0	0	100000
1029495579	0	20000	40000	0	0	0	0	0	0	0	0	0	0	0	0	0	0	0	0	0	260000	0	0	0	0	0	0	0	0	0	0	0	0	0	0	0	0	0
1030229464	160000	120000	500000	0	0	0	0	0	0	0	0	0	0	0	0	0	0	0	0	0	700000	0	0	0	0	0	0	0	0	0	0	0	0	0	0	0	0	0
8010091	100000	1120000	1440000	1540000	0	0	0	0	0	0	0	0	0	0	0	360000	0	0	0	0	1160000	0	0	0	0	0	0	0	0	0	0	0	0	0	0	0	0	0
12744528	40000	1480000	1440000	220000	0	0	0	0	0	0	0	0	0	0	0	0	0	0	0	0	1600000	0	0	0	0	0	0	0	0	0	0	0	0	0	0	0	0	0
1032326486	160000	720000	700000	1160000	640000	0	0	0	780000	600000	760000	0	0	1160000	0	760000	20000	0	0	0	780000	0	0	0	0	0	0	0	0	0	0	720000	0	0	1100000	0	0	820000
1024640820	0	840000	1180000	1660000	0	0	0	0	1580000	0	0	0	0	0	0	1520000	0	0	0	0	20000	0	0	0	0	0	0	0	0	0	0	0	0	0	0	0	0	0
1030671551	80000	1380000	1480000	2080000	0	0	0	0	1560000	0	1180000	0	0	4380000	0	0	0	0	0	0	1500000	0	0	0	0	0	0	0	0	0	0	0	0	0	0	0	0	0
1029503670	260000	1420000	1340000	2740000	1880000	0	0	0	1520000	980000	1140000	1300000	520000	1880000	0	2800000	1460000	0	0	0	2120000	1860000	0	0	0	0	0	0	0	0	0	1220000	0	0	2000000	0	0	1360000
11635940	160000	840000	800000	1320000	0	0	0	0	880000	0	0	0	0	0	0	860000	0	0	0	0	860000	0	0	0	0	0	0	0	0	0	0	0	0	0	0	0	0	0
1029194575	200000	580000	1020000	1980000	20000	0	0	0	1940000	1160000	1460000	0	0	2280000	0	1520000	0	0	0	0	860000	0	0	0	0	0	0	0	0	0	0	1420000	0	0	2220000	0	0	1660000
1026611918	120000	1080000	20000	0	0	0	0	0	0	0	0	0	0	0	0	0	0	0	0	0	1200000	0	0	0	0	0	0	0	0	0	0	0	0	0	0	0	0	0
3406147	0	1360000	1380000	880000	20000	0	0	0	0	1000000	0	0	0	120000	0	0	0	0	0	0	60000	0	0	0	0	0	0	0	0	0	0	560000	0	0	2180000	0	0	0
1030009307	0	1300000	1380000	360000	1240000	1920000	400000	380000	1540000	1260000	1400000	1700000	1020000	2280000	0	1000000	1480000	640000	0	1140000	20000	180000	500000	0	0	0	0	0	0	0	0	1960000	0	2460000	2260000	0	140000	1560000
1029127162	0	0	1380000	2280000	1240000	0	260000	1200000	1520000	40000	1440000	1680000	1920000	2260000	2060000	1500000	1440000	980000	1040000	2260000	380000	2020000	1180000	0	980000	1200000	2080000	2380000	2040000	1160000	1040000	1360000	1280000	2020000	0	0	0	1580000
1023337550	0	600000	920000	1500000	0	0	0	0	920000	940000	1000000	0	0	2820000	0	880000	0	0	0	0	1000000	0	0	0	0	0	0	0	0	0	0	300000	0	0	1620000	0	0	1360000
1015010067	220000	920000	680000	1560000	0	0	0	0	1440000	0	1340000	0	0	2200000	0	1380000	0	0	0	0	1000000	0	0	0	0	0	0	0	0	0	0	0	0	0	0	0	0	2180000
1016701427	0	1360000	1380000	2320000	1240000	1980000	0	0	0	1200000	1500000	1660000	1860000	2320000	0	120000	1480000	0	0	0	1520000	2060000	0	0	0	0	0	0	0	20000	0	1420000	0	0	2180000	0	1140000	1600000
1029664043	280000	1500000	40000	0	0	0	0	0	0	0	0	0	0	0	0	0	0	0	0	0	1340000	0	0	0	0	0	0	0	0	0	0	0	0	0	0	0	0	0
1028204288	160000	1260000	1240000	40000	0	0	0	0	0	0	40000	0	0	180000	0	0	0	0	0	0	1160000	0	0	0	0	0	0	0	0	0	0	0	0	0	0	0	0	0
1021731440	40000	600000	20000	0	0	0	0	0	0	0	0	0	0	0	0	0	0	0	0	0	680000	0	0	0	0	0	0	0	0	0	0	0	0	0	0	0	0	0
1028169392	260000	1400000	1380000	2140000	1200000	0	0	0	40000	1220000	1480000	0	0	2260000	0	580000	0	0	0	0	1740000	0	0	0	0	0	0	0	0	0	0	1400000	0	0	2180000	0	0	1720000
1015405289	20000	1520000	1400000	2360000	960000	1400000	580000	820000	780000	860000	1160000	1500000	1360000	1300000	0	1720000	1260000	680000	780000	1520000	1440000	1700000	840000	0	0	0	0	1140000	1760000	940000	800000	940000	920000	1420000	1660000	640000	820000	1280000
1029252046	60000	1460000	1360000	2280000	0	0	0	0	0	0	0	0	0	0	0	0	0	0	0	0	1520000	0	0	0	0	0	0	0	0	0	0	0	0	0	0	0	0	0
1027256550	680000	1360000	5520000	2300000	1280000	240000	0	0	1520000	1220000	0	1700000	0	2320000	0	1480000	1360000	0	0	0	3440000	1960000	0	0	0	0	0	0	0	0	0	1440000	0	0	2140000	0	0	0
872770	260000	2520000	1800000	0	0	0	0	0	0	0	0	0	0	0	0	0	0	0	0	0	1480000	0	0	0	0	0	0	0	0	0	0	0	0	0	0	0	0	0
1017687614	0	1480000	1500000	2220000	0	0	0	0	0	0	0	0	0	0	0	0	0	0	0	0	1420000	0	0	0	0	0	0	0	0	0	0	0	0	0	0	0	0	0
1019419897	280000	2140000	2540000	4660000	0	0	0	0	1800000	0	0	0	0	0	0	1540000	0	0	0	0	1540000	0	0	0	0	0	0	0	0	0	0	0	0	0	0	0	0	0
1026091057	300000	1360000	1420000	2320000	1240000	1760000	0	0	1520000	1180000	1460000	1660000	1860000	2440000	0	1380000	1680000	0	0	0	1660000	2040000	20000	0	0	0	0	0	0	1000000	860000	1420000	840000	1580000	2200000	580000	1080000	1560000
1023583519	0	1380000	1380000	2240000	0	0	0	0	1520000	0	0	0	0	0	0	1420000	0	0	0	0	1500000	0	0	0	0	0	0	0	0	0	0	0	0	0	0	0	0	0
1016136698	180000	940000	980000	1960000	940000	1420000	460000	1100000	1000000	880000	1200000	1520000	1500000	2880000	0	920000	1280000	600000	540000	80000	1340000	1560000	740000	0	0	0	0	0	0	740000	620000	980000	800000	1360000	1680000	580000	1920000	1140000
1027330874	100000	1060000	940000	1920000	0	0	0	0	680000	0	1200000	0	0	1680000	0	1420000	0	0	0	0	800000	0	0	0	0	0	0	0	0	0	0	0	0	0	0	0	0	1200000
7496391	260000	1360000	1380000	1080000	1240000	2020000	0	0	1520000	260000	1440000	1700000	1900000	2360000	0	1480000	1520000	0	0	0	1500000	2020000	0	0	0	0	0	0	0	0	0	1760000	0	0	2220000	0	580000	1620000
1030139392	20000	60000	100000	160000	100000	0	0	0	140000	220000	80000	0	0	100000	0	40000	380000	0	0	0	160000	0	0	0	0	0	0	0	0	0	0	80000	0	0	480000	0	0	100000
1015209074	40000	40000	140000	160000	100000	0	20000	40000	160000	60000	40000	40000	60000	40000	0	60000	40000	40000	40000	60000	40000	0	40000	0	40000	0	60000	40000	40000	0	60000	20000	0	60000	40000	0	0	40000
1025114726	240000	1340000	1360000	2200000	0	0	0	0	500000	0	1580000	0	0	2280000	0	1440000	0	0	0	0	1480000	0	0	0	0	0	0	0	0	0	0	0	0	0	0	0	0	420000
11964381	260000	1360000	20000	0	0	0	0	0	0	0	0	0	0	0	0	0	0	0	0	0	1500000	0	0	0	0	0	0	0	0	0	0	0	0	0	0	0	0	0
1029744581	200000	860000	20000	0	0	0	0	0	0	0	0	0	0	0	0	0	0	0	0	0	1220000	0	0	0	0	0	0	0	0	0	0	0	0	0	0	0	0	0
1023344693	300000	1360000	1380000	2280000	0	0	0	0	1560000	0	0	0	0	100000	0	1540000	0	0	0	0	1820000	0	0	0	0	0	0	0	0	0	0	0	0	0	0	0	0	0
1029924970	240000	1300000	1440000	2300000	0	0	0	0	360000	0	0	0	0	0	0	1700000	0	0	0	0	1500000	0	0	0	0	0	0	0	0	0	0	0	0	0	0	0	0	0
1015240022	0	1080000	1520000	1220000	0	0	0	0	0	0	1500000	0	0	2280000	0	0	0	0	0	0	0	0	0	0	0	0	0	0	0	0	0	0	0	0	0	0	0	1780000
1032162525	0	1220000	1100000	2160000	0	0	0	0	2080000	0	0	0	0	20000	0	1060000	0	0	0	0	1640000	0	0	0	0	0	0	0	0	0	0	0	0	0	0	0	0	0
1014212109	0	0	1160000	2180000	0	0	0	0	1220000	0	0	0	0	0	0	1720000	0	0	0	0	0	0	0	0	0	0	0	0	0	0	0	0	0	0	0	0	0	0
1018838271	260000	800000	800000	1540000	320000	0	220000	80000	940000	800000	1080000	0	0	1620000	480000	1040000	200000	500000	160000	0	1060000	420000	400000	320000	200000	160000	180000	360000	440000	160000	200000	420000	140000	180000	940000	140000	340000	1340000
1029509151	200000	1360000	1400000	40000	0	0	0	0	0	0	0	0	0	0	0	0	0	0	0	0	1380000	0	0	0	0	0	0	0	0	0	0	0	0	0	0	0	0	0
1021688313	100000	60000	40000	60000	40000	20000	0	0	20000	40000	20000	60000	40000	40000	0	100000	60000	20000	20000	120000	80000	880000	20000	40000	20000	0	0	0	60000	0	20000	20000	0	0	60000	0	40000	40000
6178562	240000	1340000	1380000	2100000	1260000	1920000	760000	1220000	1500000	1140000	1820000	1680000	1860000	2560000	1720000	1460000	1560000	960000	1020000	2220000	1480000	1980000	1160000	2100000	880000	2240000	1120000	2320000	2040000	1300000	1040000	2820000	1280000	2020000	2180000	820000	1240000	1580000
1030475160	260000	1380000	1420000	720000	1200000	1320000	780000	1360000	1900000	1340000	1440000	0	0	1400000	0	1860000	200000	980000	1220000	2180000	1520000	0	1300000	0	0	0	0	0	1080000	1200000	20000	1480000	40000	2100000	2180000	860000	1680000	1680000
1029342334	280000	1340000	1420000	1320000	0	0	0	0	0	1160000	100000	0	0	0	0	0	0	0	0	0	1520000	0	0	0	0	0	0	0	0	0	0	0	0	0	60000	0	0	1600000
1017571355	260000	1400000	1580000	2360000	1260000	1320000	0	0	1880000	1300000	1640000	1160000	1680000	2300000	0	2140000	1380000	0	0	0	1660000	1440000	0	0	0	0	0	0	0	920000	20000	1460000	840000	0	2740000	580000	340000	1760000
1032967041	280000	1080000	1080000	1780000	1240000	0	0	0	0	980000	1300000	240000	0	480000	0	660000	1280000	0	0	0	1280000	1780000	0	0	0	0	0	0	0	0	0	1400000	0	0	1780000	0	0	1260000
6896477	220000	980000	20000	0	0	0	0	0	0	0	0	0	0	0	0	0	0	0	0	0	1180000	0	0	0	0	0	0	0	0	0	0	0	0	0	0	0	0	0
1026129934	0	1420000	860000	2200000	600000	0	780000	880000	1800000	1320000	0	0	0	460000	0	1600000	580000	660000	1120000	100000	1620000	0	1280000	0	0	0	1460000	1360000	60000	0	0	1520000	0	20000	2560000	0	300000	680000
1021659852	0	1100000	960000	240000	0	0	0	0	0	0	0	0	0	0	0	0	0	0	0	0	320000	0	0	0	0	0	0	0	0	0	0	0	0	0	0	0	0	0
1030159570	260000	2140000	1400000	2240000	1260000	1780000	720000	1060000	1200000	1080000	1720000	1360000	2080000	3040000	1520000	900000	2000000	1320000	740000	1780000	1540000	1600000	860000	1660000	1240000	2260000	1300000	1900000	1400000	1100000	820000	1360000	1000000	1880000	2140000	660000	720000	1800000
9272816	180000	920000	920000	1500000	0	0	0	0	1020000	0	120000	0	0	1500000	0	1000000	0	0	0	0	1000000	0	0	0	0	0	0	0	0	0	0	0	0	0	0	0	0	0
1029680735	240000	1380000	1380000	2240000	1240000	1780000	0	0	1540000	1160000	760000	0	0	2240000	0	1480000	580000	0	0	0	1540000	3300000	0	0	0	0	0	0	0	1300000	1300000	1400000	1280000	160000	2160000	840000	1280000	1280000
2575828	60000	0	1360000	2320000	0	0	0	0	1680000	0	960000	0	0	2380000	0	1600000	0	0	0	0	20000	0	0	0	0	0	0	0	0	0	0	0	0	0	0	0	0	140000
1027143948	0	0	640000	2240000	0	0	0	0	0	0	0	0	0	0	0	40000	0	0	0	0	0	0	0	0	0	0	0	0	0	0	0	0	0	0	0	0	0	0
1029747335	0	1360000	1360000	2240000	1240000	0	0	0	1120000	1060000	0	0	0	0	0	1480000	1480000	0	0	0	2060000	1200000	0	700000	1740000	0	1820000	2340000	2040000	0	0	1400000	0	0	2160000	0	0	80000
1015030245	0	1740000	1200000	1580000	0	0	0	0	260000	0	0	0	0	0	0	1320000	0	0	0	0	0	0	0	0	0	0	0	0	0	0	0	0	0	0	0	0	0	0
1029519147	260000	1420000	1380000	2960000	0	0	0	0	20000	0	0	0	0	0	0	2120000	0	0	0	0	1540000	0	0	0	0	0	0	0	0	0	0	0	0	0	0	0	0	0
1031113072	0	1280000	960000	1120000	0	0	0	0	860000	0	0	0	0	0	0	720000	0	0	0	0	1080000	0	0	0	0	0	0	0	0	0	0	0	0	0	0	0	0	0
12833004	0	1000000	980000	1520000	0	0	0	0	300000	0	420000	0	0	1480000	0	300000	0	0	0	0	680000	0	0	0	0	0	0	0	0	0	0	0	0	0	0	0	0	0
1029805051	0	1100000	760000	1260000	0	0	0	0	100000	0	0	0	0	0	0	1080000	0	0	0	0	1220000	0	0	0	0	0	0	0	0	0	0	0	0	0	0	0	0	0
1030997422	0	0	1320000	2240000	0	0	0	0	1520000	900000	1440000	0	0	2240000	0	1500000	0	0	0	0	0	0	0	0	0	0	0	0	0	0	0	0	0	0	0	0	0	1580000
1017822190	220000	480000	840000	2240000	1240000	0	0	0	1540000	2400000	1440000	1680000	820000	2300000	0	1580000	1480000	0	0	0	1080000	2020000	0	0	0	0	0	0	0	0	0	1420000	0	0	4340000	0	0	1580000
1020776079	0	1400000	200000	0	0	0	0	0	0	0	0	0	0	0	0	0	0	0	0	0	1580000	0	0	0	0	0	0	0	0	0	0	0	0	0	0	0	0	0
6943340	320000	1740000	1500000	1600000	0	0	0	0	1520000	0	0	0	0	40000	0	1620000	0	0	0	0	1720000	0	0	0	0	0	0	0	0	0	0	0	0	0	0	0	0	0
1022378691	300000	1460000	1420000	2480000	0	0	0	0	2180000	0	220000	0	0	2260000	0	2400000	0	0	0	0	1860000	0	0	0	0	0	0	0	0	0	0	0	0	0	0	0	0	0
1028795931	0	400000	1360000	2200000	0	0	0	0	1420000	0	400000	0	0	2280000	0	1480000	0	0	0	0	1560000	0	0	0	0	0	0	0	0	0	0	0	0	0	0	0	0	0
6040113	160000	1020000	1140000	1740000	1580000	1300000	0	0	1060000	740000	1020000	1100000	1260000	2980000	0	240000	1340000	0	0	0	1040000	1520000	0	0	0	0	0	0	0	0	0	1300000	0	0	1460000	0	780000	1060000
1026805090	240000	2900000	2780000	2200000	0	0	0	0	4180000	0	0	0	0	0	0	2420000	0	0	0	0	3020000	0	0	0	0	0	0	0	0	0	0	0	0	0	0	0	0	0
1022356905	0	1180000	1400000	2220000	0	0	0	0	0	0	0	0	0	0	0	460000	0	0	0	0	0	0	0	0	0	0	0	0	0	0	0	0	0	0	0	0	0	0
1031067430	60000	100000	140000	20000	0	0	0	0	0	0	0	0	0	20000	0	0	0	0	0	0	60000	0	0	0	0	0	0	0	0	0	0	0	0	0	0	0	0	0
4098286	20000	20000	40000	1680000	0	0	0	0	0	1140000	2120000	0	0	2280000	0	0	0	0	0	0	20000	0	0	0	0	0	0	0	0	0	0	20000	0	0	2140000	0	0	1500000
1029348552	260000	1360000	1400000	40000	0	0	0	0	0	0	0	0	0	0	0	0	0	0	0	0	1520000	0	0	0	0	0	0	0	0	0	0	0	0	0	0	0	0	0
1029187564	0	1440000	760000	0	0	0	0	0	0	0	0	0	0	0	0	0	0	0	0	0	200000	0	0	0	0	0	0	0	0	0	0	0	0	0	0	0	0	0
1030661189	200000	920000	40000	0	0	0	0	0	0	0	0	0	0	0	0	0	0	0	0	0	1080000	0	0	0	0	0	0	0	0	0	0	0	0	0	0	0	0	0
1019739876	300000	1460000	1360000	2220000	1380000	0	0	0	1540000	840000	1400000	0	0	2300000	0	1740000	1680000	0	0	0	1560000	600000	0	0	0	0	0	0	0	0	0	2600000	0	0	1760000	0	0	1600000
1027619308	220000	1120000	1100000	1560000	1000000	1680000	640000	960000	1560000	980000	1480000	1360000	1380000	1880000	0	1400000	1220000	780000	900000	60000	1240000	1600000	400000	0	0	0	0	0	0	1140000	900000	1160000	1140000	1840000	1780000	780000	2020000	1300000
1026661274	0	1360000	1380000	2620000	0	0	0	0	180000	0	0	0	0	0	0	1560000	0	0	0	0	1520000	0	0	0	0	0	0	0	0	0	0	0	0	0	0	0	0	0
1030016684	0	1400000	1380000	860000	0	0	0	0	0	0	0	0	0	0	0	0	0	0	0	0	1520000	0	0	0	0	0	0	0	0	0	0	0	0	0	0	0	0	0
1030631177	0	920000	920000	980000	0	0	0	0	0	0	0	0	0	0	0	0	0	0	0	0	1100000	0	0	0	0	0	0	0	0	0	0	0	0	0	0	0	0	0
1029228355	260000	1360000	1440000	2260000	1000000	0	0	0	1880000	1080000	1200000	0	0	2000000	0	1800000	980000	0	0	0	1520000	0	0	0	0	0	0	0	0	0	0	1180000	0	0	1760000	0	0	1300000
11540075	0	560000	440000	0	0	0	0	0	0	0	0	0	0	0	0	0	0	0	0	0	880000	0	0	0	0	0	0	0	0	0	0	0	0	0	0	0	20000	0
1015600459	120000	1700000	1120000	0	2980000	0	0	0	600000	2540000	3040000	0	0	3440000	0	0	3540000	0	0	0	1760000	200000	0	0	0	0	0	0	0	0	0	2660000	0	0	4780000	0	0	3880000
673061	260000	1400000	1480000	2380000	1240000	80000	760000	0	1500000	1180000	1400000	1560000	1940000	2100000	0	1660000	1480000	1320000	900000	0	1560000	1980000	1140000	0	0	0	0	0	0	0	0	1480000	0	2060000	2160000	0	0	1600000
6888818	0	1340000	1360000	2300000	0	0	0	0	440000	0	0	0	0	0	0	1480000	0	0	0	0	380000	0	0	0	0	0	0	0	0	0	0	0	0	0	0	0	0	0
12556828	280000	1400000	1340000	800000	0	0	0	0	1180000	280000	0	0	0	0	0	1140000	0	0	0	0	1200000	0	0	0	0	0	0	0	0	0	0	0	0	0	0	0	0	0
1024960847	80000	720000	360000	800000	0	0	0	0	0	0	0	0	0	0	0	20000	0	0	0	0	300000	0	0	0	0	0	0	0	0	0	0	0	0	0	0	0	0	0
1029258055	180000	1140000	1480000	2200000	0	0	0	0	1320000	0	0	0	0	0	0	1280000	0	0	0	0	1060000	0	0	0	0	0	0	0	0	0	0	0	0	0	0	0	0	0
1029391611	300000	1400000	1440000	2260000	1360000	0	0	0	1580000	1160000	1380000	0	0	2400000	0	1700000	1520000	0	0	0	1720000	100000	0	0	0	0	0	0	0	0	0	1480000	0	0	2080000	0	0	1520000
1025185478	0	1360000	1380000	2240000	1280000	2220000	980000	1220000	2060000	700000	1480000	20000	1980000	2300000	2360000	1800000	1060000	980000	1060000	2300000	1440000	0	1180000	1860000	1740000	1860000	2280000	1640000	1400000	1360000	1060000	1660000	1280000	2080000	2820000	840000	1700000	640000
6683121	0	1540000	460000	0	0	0	0	0	0	0	0	0	0	40000	0	0	0	0	0	0	1200000	0	0	0	0	0	0	0	0	0	0	0	0	0	0	0	0	1260000
1020868134	420000	860000	1440000	1320000	1240000	1140000	0	0	1520000	1260000	1460000	1420000	0	200000	0	240000	20000	0	0	0	1060000	2180000	100000	0	0	0	0	0	0	1120000	880000	1260000	1180000	1620000	1760000	840000	560000	980000
6015003	140000	700000	700000	900000	1220000	1900000	0	0	1480000	640000	720000	0	1860000	1140000	0	0	1300000	0	1020000	0	760000	60000	1140000	0	0	0	0	0	0	0	0	0	0	0	0	0	620000	0
1027384613	0	720000	1460000	2860000	0	0	0	0	0	0	0	0	0	0	0	100000	0	0	0	0	1340000	0	0	0	0	0	0	0	0	0	0	0	0	0	0	0	0	0
1015470814	0	1340000	20000	0	0	0	0	0	0	0	0	0	0	0	0	0	0	0	0	0	780000	0	0	0	0	0	0	0	0	0	0	0	0	0	0	0	0	0
1032290495	140000	1440000	1440000	2460000	0	0	0	0	1800000	0	0	0	0	0	0	1900000	0	0	0	0	1720000	0	0	0	0	0	0	0	0	0	0	0	0	0	0	0	0	0
1027326767	300000	1460000	1740000	80000	0	0	0	0	0	0	0	0	300000	0	0	0	0	0	0	0	500000	0	0	0	0	0	0	0	0	0	0	0	0	0	0	0	0	0
1029338395	140000	820000	1160000	1840000	1280000	1020000	0	0	1040000	900000	940000	1340000	1720000	1320000	0	1260000	1460000	0	0	0	840000	1700000	0	0	0	0	0	0	0	0	0	1040000	0	0	2360000	0	0	1240000
1026141235	100000	1340000	1360000	2220000	0	0	0	0	0	0	0	0	0	0	0	1040000	0	0	0	0	1220000	0	0	0	0	0	0	0	0	0	0	0	0	0	0	0	0	0
1020927839	260000	1360000	1360000	1720000	1220000	0	0	0	0	380000	0	0	0	0	0	0	880000	0	0	0	1500000	0	0	260000	1720000	0	2800000	2340000	2000000	1580000	0	1440000	1220000	0	1820000	820000	800000	0
1027015599	140000	900000	1060000	1640000	0	0	0	0	0	0	0	0	0	0	0	0	0	0	0	0	1240000	0	0	0	0	0	0	0	0	0	0	0	0	0	0	0	0	0
1015588645	0	980000	660000	580000	0	0	0	0	0	0	0	0	0	0	0	20000	0	0	0	0	1120000	0	0	0	0	0	0	0	0	0	0	0	0	0	0	0	0	0
1029082580	300000	0	20000	0	0	440000	0	0	0	0	0	20000	640000	0	0	0	0	0	0	0	660000	40000	0	0	0	0	0	0	0	2460000	1200000	0	1580000	1720000	0	900000	2220000	0
11584226	260000	680000	380000	0	0	0	0	0	0	0	0	0	0	0	0	0	0	0	0	0	800000	0	0	0	0	0	0	0	0	0	0	0	0	0	0	0	0	0
1032583300	140000	1020000	1460000	200000	0	0	0	0	0	0	0	0	0	0	0	0	0	0	0	0	1120000	0	0	0	0	0	0	0	0	0	0	0	0	0	0	0	0	0
1032565744	140000	940000	900000	1520000	840000	0	0	0	860000	1500000	740000	0	0	2160000	0	880000	1000000	0	0	0	920000	0	0	0	0	0	0	0	0	0	0	940000	0	0	1560000	0	0	800000
1016679933	200000	1080000	140000	0	1120000	0	620000	1040000	1540000	1420000	1260000	1140000	280000	1860000	1700000	0	1260000	780000	840000	1800000	980000	1700000	1040000	2760000	1720000	2240000	1820000	2380000	2020000	0	0	940000	0	2040000	2140000	0	0	1440000
1029377457	20000	1580000	1500000	2660000	0	0	0	0	0	0	0	0	0	0	0	20000	0	0	0	0	1500000	0	0	0	0	0	0	0	0	0	0	0	0	0	0	0	0	0
1433048	160000	1100000	1080000	1800000	0	0	0	0	3060000	540000	1440000	0	0	1800000	0	1300000	0	0	0	0	1220000	0	0	0	0	0	0	0	0	0	0	0	0	0	0	0	0	1440000
1026253446	200000	0	1020000	2460000	0	0	0	0	580000	0	0	0	0	0	0	1900000	0	0	0	0	200000	0	0	0	0	0	0	0	0	0	0	0	0	0	0	0	0	0
1032157266	300000	980000	620000	0	0	0	0	0	820000	0	0	0	0	0	0	60000	0	0	0	0	1340000	0	0	0	0	0	0	0	0	0	0	0	0	0	0	0	0	0
8219850	0	20000	1380000	2320000	1280000	2040000	780000	1720000	1640000	1240000	1460000	1680000	1900000	2240000	0	1520000	1500000	240000	1360000	1520000	0	1920000	1160000	0	200000	0	1920000	2320000	1980000	1300000	1080000	1420000	1280000	2040000	240000	860000	1320000	1620000
1024378154	80000	300000	1680000	2040000	0	0	0	0	100000	0	0	0	0	40000	0	1080000	0	0	0	0	280000	0	0	0	0	0	0	0	0	0	0	0	0	0	0	0	0	0
7746050	0	240000	100000	0	0	0	0	0	0	0	0	0	0	0	0	0	0	0	0	0	0	0	0	0	0	0	0	0	0	0	0	0	0	0	0	0	0	0
1029752795	0	1780000	1480000	2340000	1020000	0	0	0	1780000	1020000	1180000	1720000	240000	2880000	0	1880000	120000	0	0	0	1500000	1980000	0	0	0	0	0	0	0	0	0	1280000	0	0	2040000	0	0	1620000
1022708180	240000	1120000	1120000	1840000	0	0	0	0	200000	0	0	0	0	0	0	1200000	0	0	0	0	1760000	0	0	0	0	0	0	0	0	0	0	0	0	0	0	0	0	0
1031687999	0	1400000	3220000	3080000	1340000	4800000	960000	1100000	1500000	940000	1540000	2040000	4300000	3880000	0	600000	760000	1000000	1160000	2080000	0	3840000	1200000	140000	1820000	20000	2420000	2200000	2420000	1120000	0	2360000	480000	0	2860000	0	2020000	1700000
1015302209	0	1400000	1400000	0	0	0	0	0	0	0	0	0	0	0	0	0	0	0	0	0	500000	0	0	0	0	0	0	0	0	0	0	0	0	0	0	0	0	0
1029816745	200000	1140000	2440000	2140000	0	0	0	0	0	0	0	0	0	0	0	680000	0	0	0	0	1160000	0	0	0	0	0	0	0	0	0	0	0	0	0	0	0	0	0
6664395	160000	1340000	1400000	1500000	1100000	1980000	0	0	1720000	1120000	1460000	700000	1260000	2540000	0	1220000	720000	0	0	0	1020000	1940000	0	0	0	0	0	0	0	1300000	320000	1360000	1260000	100000	3280000	600000	1280000	1760000
1028582256	0	0	40000	1860000	0	0	0	0	0	0	0	0	0	0	0	20000	0	0	0	0	0	0	0	0	0	0	0	0	0	0	0	0	0	0	0	0	0	0
1019043555	180000	980000	1420000	1220000	0	0	0	0	0	0	0	0	0	0	0	0	0	0	0	0	460000	0	0	0	0	0	0	0	0	0	0	0	0	0	0	0	0	0
1030159879	80000	1380000	1420000	2360000	0	0	0	0	840000	0	0	0	0	0	0	1760000	0	0	0	0	1700000	0	0	0	0	0	0	0	0	0	0	0	0	0	0	0	0	0
11569757	280000	2120000	1240000	1140000	0	0	0	0	0	0	0	0	0	0	0	420000	0	0	0	0	1540000	0	0	0	0	0	0	0	0	0	0	0	0	0	0	0	0	0
1030525485	0	1380000	1400000	2460000	1280000	2020000	0	0	1740000	1240000	1440000	1720000	2320000	2280000	0	1540000	1540000	0	0	0	1500000	2240000	0	0	0	0	0	0	0	1220000	0	1560000	0	0	2860000	0	1280000	1580000
1025853434	0	0	60000	2620000	1340000	1820000	900000	1300000	2080000	1080000	0	1360000	3440000	60000	0	1600000	1480000	1020000	1340000	2260000	20000	2580000	1180000	0	0	0	1140000	2440000	2260000	1180000	1180000	2280000	1380000	2320000	2020000	880000	440000	0
8125537	160000	980000	920000	1560000	0	0	0	0	20000	0	0	0	0	0	0	1180000	0	0	0	0	1040000	0	0	0	0	0	0	0	0	0	0	0	0	0	0	0	0	0
1026773140	260000	1740000	1480000	2240000	0	0	0	0	0	0	0	0	0	0	0	0	0	0	0	0	1560000	0	0	0	0	0	0	0	0	0	0	0	0	0	0	0	0	0
1022130400	80000	480000	20000	0	0	0	0	0	0	0	0	0	0	0	0	0	0	0	0	0	960000	0	0	0	0	0	0	0	0	0	0	0	0	0	0	0	0	0
1026502184	260000	1120000	1180000	1820000	1500000	2280000	1220000	1940000	0	960000	0	1920000	1700000	20000	1380000	20000	1560000	1100000	620000	3340000	1380000	2300000	920000	1520000	0	1660000	0	900000	60000	1340000	1080000	500000	1500000	2200000	1080000	860000	1580000	1100000
1025316058	280000	1360000	1440000	2340000	1260000	0	160000	1100000	1520000	840000	1860000	1700000	200000	3760000	0	1660000	3060000	980000	1040000	2240000	1560000	2040000	1240000	0	0	0	0	0	1940000	1340000	1060000	2700000	1320000	2020000	1440000	840000	1040000	2940000
1021288195	20000	0	20000	0	20000	0	40000	0	120000	20000	0	20000	60000	20000	0	0	20000	0	20000	0	60000	0	0	20000	40000	20000	0	0	40000	20000	40000	140000	20000	40000	140000	20000	0	20000
1028105699	260000	1360000	1380000	2240000	0	0	0	0	0	0	0	0	0	0	0	1360000	0	0	0	0	1500000	0	0	0	0	0	0	0	0	0	0	0	0	0	0	0	0	0
1028910785	0	960000	40000	0	0	0	0	0	0	0	0	0	0	0	0	0	0	0	0	0	1040000	0	0	0	0	0	0	0	0	0	0	0	0	0	0	0	0	0
1023010198	0	3540000	1060000	1900000	0	0	0	0	1780000	0	0	0	0	0	0	380000	0	0	20000	0	3420000	0	0	0	0	0	0	0	0	0	0	0	0	0	0	0	0	0
10508175	260000	1360000	1400000	2300000	0	0	0	0	1720000	0	0	0	0	0	0	1140000	0	0	0	0	1540000	0	0	0	0	0	0	0	0	0	0	0	0	0	0	0	0	0
10787246	220000	720000	220000	0	0	0	0	0	0	0	0	0	0	0	0	0	0	0	0	0	1020000	0	0	0	0	0	0	0	0	0	0	0	0	0	0	0	0	0
1028055918	120000	80000	240000	2220000	0	0	0	0	1680000	800000	1440000	0	0	2220000	0	1740000	0	0	0	0	640000	0	0	0	0	0	0	0	0	0	0	880000	0	0	2160000	0	0	1000000
1032679120	260000	1360000	1380000	2240000	0	0	0	0	660000	0	0	0	0	0	0	1480000	0	0	0	0	1500000	0	0	0	0	0	0	0	0	0	0	0	0	0	0	0	0	0
9210104	0	0	40000	0	0	0	0	0	0	0	0	0	0	0	0	0	0	0	0	0	0	0	0	0	0	0	0	0	0	0	0	0	0	0	0	0	0	0
5533654	380000	2240000	1780000	2660000	1300000	1940000	780000	1200000	1020000	1880000	1440000	1740000	1660000	900000	0	1580000	1540000	1140000	2240000	2340000	1580000	2040000	2540000	0	0	0	0	0	20000	2000000	1080000	1500000	1360000	2120000	3560000	1200000	2240000	1700000
1032256109	40000	1440000	1540000	2940000	1160000	0	0	0	1600000	1380000	1580000	0	0	2400000	0	1560000	560000	0	0	0	1480000	0	0	0	0	0	0	0	0	1080000	1020000	1440000	1100000	840000	2400000	720000	0	1920000
1017370237	260000	1400000	1400000	2480000	0	0	0	0	1600000	0	0	0	0	1780000	0	1960000	0	0	0	0	1860000	0	0	0	0	0	0	0	0	0	0	0	0	0	0	0	0	0
1017475918	240000	1360000	1340000	2220000	0	0	0	0	240000	0	0	0	0	0	0	1460000	0	0	0	0	1500000	0	0	0	0	0	0	0	0	0	0	0	0	0	0	0	0	0
7250555	280000	1400000	1380000	4320000	0	1040000	0	0	3060000	840000	1480000	320000	0	2600000	80000	3280000	1580000	0	0	0	1920000	460000	20000	0	0	0	0	40000	2040000	3340000	1100000	440000	1800000	6260000	0	1000000	1780000	3700000
7054968	160000	800000	1220000	1160000	1160000	1540000	900000	2160000	220000	1180000	0	1660000	1640000	100000	0	1180000	1480000	1140000	1100000	2860000	1380000	2200000	1320000	0	0	0	0	20000	1260000	1180000	860000	1480000	1060000	1380000	1960000	680000	1200000	0
1017557283	0	1840000	1460000	200000	0	0	0	0	1520000	0	0	0	0	0	0	1180000	0	0	0	0	1600000	0	0	0	0	0	0	0	0	0	0	0	0	0	0	0	0	0
6939231	120000	1040000	1180000	1940000	1020000	1640000	0	0	1240000	1100000	1120000	1400000	1520000	1020000	0	1260000	1220000	0	0	0	1280000	1820000	0	0	0	0	0	0	0	260000	860000	20000	1120000	1620000	1780000	540000	1180000	1360000
1017759636	160000	1140000	1380000	1520000	1020000	0	0	0	1220000	1080000	1120000	0	0	1960000	0	1240000	20000	0	0	0	1240000	0	0	0	0	0	0	0	0	0	0	1160000	0	0	1820000	0	0	1300000
6278118	280000	980000	1380000	2220000	740000	0	0	0	1620000	1140000	1320000	0	0	2440000	0	1540000	1480000	0	0	0	1340000	40000	0	0	0	0	0	0	0	0	0	1600000	0	0	2860000	0	0	1620000
1017994109	260000	1380000	1380000	2240000	1280000	0	0	0	1120000	1160000	1320000	0	0	1800000	0	1500000	1480000	0	0	0	1540000	0	0	0	0	0	0	0	0	0	0	1420000	0	0	2160000	0	0	1540000
1018039670	0	1180000	400000	0	0	0	0	0	0	0	0	0	0	0	0	0	0	0	0	0	1100000	0	0	0	0	0	0	0	0	0	0	0	0	0	0	0	0	0
1029977732	60000	40000	800000	560000	0	0	0	0	0	0	0	0	0	0	0	0	0	0	0	0	700000	0	0	0	0	0	0	0	0	0	0	0	0	0	0	0	0	0
1018378782	260000	1380000	1640000	2380000	0	0	0	0	1520000	1180000	1440000	0	0	2320000	0	1940000	0	0	0	0	1520000	0	0	0	0	0	0	0	0	0	0	1180000	0	0	2160000	0	0	1580000
1018517961	0	1240000	1500000	860000	0	0	0	0	960000	0	0	0	0	0	0	740000	0	0	0	0	780000	0	0	0	0	0	0	0	0	0	0	0	0	0	0	0	0	0
1018603934	0	1080000	960000	1500000	0	0	0	0	1040000	320000	0	0	0	1140000	0	1060000	0	0	0	0	1460000	0	0	0	0	0	0	0	0	0	0	0	0	0	0	0	0	0
1018816897	0	1360000	1700000	4060000	1240000	1760000	0	0	2540000	1160000	1520000	6740000	3340000	3360000	0	0	1480000	0	0	0	1500000	2040000	20000	0	0	0	0	0	0	0	0	1400000	0	0	2180000	0	0	1580000
5197375	260000	920000	1000000	1400000	0	0	0	0	740000	0	1060000	0	0	1840000	0	520000	0	0	0	0	1040000	0	0	0	0	0	0	0	0	0	0	0	0	0	0	0	0	1100000
1018953172	280000	1440000	1100000	940000	0	0	0	0	0	0	0	0	0	0	0	0	0	0	0	0	2020000	0	0	0	0	0	0	0	0	0	0	0	0	0	0	0	0	0
1029764703	160000	640000	1160000	1040000	1240000	1940000	0	0	1660000	1140000	1440000	1720000	1860000	2200000	0	1280000	1480000	0	0	0	1000000	1980000	0	0	0	0	0	0	0	60000	0	1380000	0	0	2200000	0	1720000	1580000
1019216700	0	40000	40000	2540000	0	0	0	0	0	0	0	0	0	0	0	80000	0	0	0	0	60000	20000	0	0	0	0	0	0	0	0	0	0	0	0	0	0	0	0
1029761223	140000	1420000	1380000	60000	0	0	0	0	0	0	0	0	0	0	0	0	0	0	0	0	1600000	0	0	0	0	0	0	0	0	0	0	0	0	0	0	0	0	0
1019373234	0	1600000	1420000	2840000	0	0	0	0	1560000	920000	1420000	0	0	2480000	0	1500000	0	0	0	0	1600000	0	0	0	0	0	0	0	0	0	0	0	0	0	0	0	0	1280000
1019410094	100000	1540000	1380000	40000	0	0	0	0	0	1140000	640000	780000	1460000	1840000	0	0	0	0	0	0	880000	0	0	0	0	0	0	0	0	0	0	0	0	0	640000	0	0	20000
1030293227	260000	800000	720000	1380000	60000	0	0	0	1600000	1200000	1460000	0	0	2260000	0	1100000	0	0	0	0	1240000	0	0	0	0	0	0	0	0	0	0	1620000	0	0	2200000	0	0	1580000
1019918172	0	820000	860000	1340000	0	0	0	0	960000	720000	920000	0	0	1420000	0	840000	0	0	0	0	740000	0	0	0	0	0	0	0	0	0	0	0	0	0	0	0	0	1040000
1019920050	220000	1220000	1380000	1900000	1280000	1520000	480000	1080000	1300000	1120000	260000	1360000	1620000	1840000	0	1240000	1500000	0	80000	1820000	940000	1440000	1160000	2100000	1180000	620000	1360000	0	40000	1260000	1060000	1500000	1200000	2000000	2200000	880000	1280000	0
1031108960	300000	1140000	400000	1260000	0	0	0	0	260000	0	0	0	0	0	0	1040000	0	0	0	0	900000	0	0	0	0	0	0	0	0	0	0	0	0	0	0	0	0	0
4438576	0	1560000	1440000	2360000	0	0	0	0	1320000	20000	1180000	0	0	1880000	0	1260000	0	0	0	0	1640000	0	0	0	0	0	0	0	0	0	0	0	0	0	0	0	0	1400000
4416745	0	1160000	1800000	900000	0	0	0	0	580000	980000	980000	0	0	1880000	0	1260000	0	0	0	0	1240000	0	0	0	0	0	0	0	0	0	0	0	0	0	20000	0	0	1200000
1029705126	0	320000	80000	1340000	60000	780000	0	0	1260000	220000	1220000	1460000	1740000	1920000	0	940000	0	0	0	0	1320000	1600000	0	0	0	0	0	0	0	0	0	0	0	0	960000	0	0	140000
1020077035	260000	1360000	240000	0	0	0	0	0	0	0	0	0	0	0	0	0	0	0	0	0	1060000	0	0	0	0	0	0	0	0	0	0	0	0	0	0	0	0	0
4085378	20000	40000	40000	20000	20000	20000	0	0	20000	20000	20000	0	0	160000	0	20000	20000	0	0	0	20000	20000	0	0	0	0	0	0	0	0	0	460000	0	0	20000	0	0	20000
1020121468	240000	1380000	1220000	2260000	0	0	0	0	1080000	0	0	0	0	520000	0	1460000	0	0	0	0	1500000	0	0	0	0	0	0	0	0	0	0	0	0	0	0	0	0	0
1029660834	280000	1420000	1380000	1700000	1200000	0	700000	1160000	0	1160000	940000	1680000	980000	1460000	1880000	260000	1480000	980000	1020000	2820000	1480000	1980000	1080000	2000000	1720000	280000	1900000	2320000	2140000	0	0	1400000	0	60000	2200000	0	40000	1040000
1031131757	260000	860000	980000	1460000	840000	1340000	0	0	1100000	800000	620000	1220000	1360000	1080000	0	1060000	1180000	0	0	0	980000	1360000	0	0	0	0	0	0	0	100000	0	220000	0	0	1440000	0	860000	20000
1029655362	0	740000	280000	0	0	0	0	0	0	0	0	0	0	0	0	0	0	0	0	0	460000	0	0	0	0	0	0	0	0	0	0	0	0	0	0	0	0	0
1020239916	320000	1220000	1020000	840000	1040000	0	0	0	1100000	1020000	1160000	0	0	1500000	0	1100000	560000	0	0	0	1380000	0	0	0	0	0	0	0	0	0	0	1140000	0	0	2220000	0	0	960000
1030528174	0	0	20000	0	0	0	0	0	0	0	0	0	0	0	0	0	0	0	0	0	0	0	0	0	0	0	0	0	0	0	0	0	0	0	0	0	0	0
1016304347	140000	760000	660000	1080000	0	0	0	0	700000	0	0	0	0	80000	0	920000	0	0	0	0	860000	0	0	0	0	0	0	0	0	0	0	0	0	0	0	0	0	0
3455077	0	720000	480000	0	0	0	0	0	0	0	0	0	0	0	0	0	0	0	0	0	760000	0	0	0	0	0	0	0	0	0	0	0	0	0	0	0	0	0
8089370	20000	0	20000	0	0	0	0	0	0	0	0	0	0	0	0	0	0	0	0	0	40000	0	0	0	0	0	0	0	0	0	0	0	0	0	0	0	0	0
1031152907	300000	100000	960000	3440000	0	0	0	0	1580000	0	1480000	0	0	2260000	0	1680000	0	0	0	0	200000	0	0	0	0	0	0	0	0	0	0	0	0	0	0	0	0	20000
1029650208	140000	1400000	1420000	2120000	0	0	0	0	520000	1220000	2060000	0	0	3080000	0	1420000	0	0	0	0	1100000	0	0	0	0	0	0	0	0	0	0	0	0	0	160000	0	0	1580000
1029929753	260000	1560000	1120000	3000000	0	0	0	0	1560000	0	0	0	0	40000	0	1640000	0	0	0	0	1340000	0	0	0	0	0	0	0	0	0	0	0	0	0	0	0	0	0
3091374	180000	1400000	1420000	2280000	0	0	0	0	160000	0	0	0	0	0	0	1520000	0	0	0	0	1100000	0	0	0	0	0	0	0	0	0	0	0	0	0	0	0	0	0
1031192840	40000	1340000	20000	0	0	0	0	0	0	0	0	0	0	0	0	0	0	0	0	0	1480000	0	0	0	0	0	0	0	0	0	0	0	0	0	0	0	0	0
1020654098	120000	1580000	1700000	200000	0	0	0	0	1580000	1140000	1500000	0	0	2520000	0	1320000	0	0	0	0	1320000	40000	0	0	0	0	0	0	0	0	0	300000	0	0	1960000	0	0	1640000
3054120	40000	1360000	1680000	2240000	1400000	1860000	860000	1200000	1600000	1160000	1480000	0	0	2260000	2140000	1460000	1480000	980000	1040000	2220000	900000	280000	1160000	2100000	1720000	2440000	1600000	2220000	2360000	0	0	1400000	0	0	2180000	0	0	1580000
1020664226	300000	1560000	1400000	2340000	1200000	0	620000	960000	1560000	1160000	1480000	40000	0	2720000	0	1480000	0	780000	780000	1760000	1640000	2480000	880000	0	0	0	0	1460000	1620000	0	0	1400000	0	0	2320000	0	0	100000
1030264766	220000	1240000	1400000	2240000	0	0	0	0	2460000	0	0	0	0	2200000	0	1440000	0	0	0	0	1520000	0	0	0	0	0	0	0	0	0	0	0	0	0	0	0	0	0
2847004	260000	1140000	1220000	1800000	0	0	0	0	2120000	0	1000000	0	0	1560000	0	1280000	0	0	0	0	1220000	0	0	0	0	0	0	0	0	0	0	0	0	0	0	0	0	1040000
1020778828	260000	680000	1400000	1420000	60000	0	0	0	0	1160000	1460000	0	0	2240000	0	0	0	0	0	0	880000	0	0	0	0	0	0	0	0	0	0	1400000	0	0	2080000	0	0	1520000
1029603222	260000	1380000	1380000	2520000	0	0	0	0	1800000	0	0	0	0	0	0	1480000	0	0	0	0	1520000	0	0	0	0	0	0	0	0	0	0	0	0	0	0	0	0	0
1029599776	0	2960000	2820000	4800000	2140000	3680000	580000	820000	5220000	2040000	1580000	2840000	4340000	3340000	2860000	2720000	3300000	860000	580000	1320000	4940000	6740000	520000	2100000	1580000	2720000	1840000	2280000	3140000	2380000	1620000	3220000	2260000	2860000	5340000	1260000	2600000	1580000
1021019085	0	1520000	1440000	1580000	0	0	0	0	1520000	0	1440000	0	0	2260000	0	1500000	0	0	0	0	1640000	0	0	0	0	0	0	0	0	0	0	660000	0	0	700000	0	0	1800000
1021218578	220000	1060000	800000	0	0	0	0	0	0	0	0	0	0	0	0	0	0	0	0	0	880000	0	0	0	0	0	0	0	0	0	0	0	0	0	0	0	0	0
1021349258	220000	1060000	940000	2020000	2080000	1500000	140000	0	20000	800000	1060000	580000	1780000	1940000	0	800000	1680000	700000	1400000	0	1520000	2600000	860000	2620000	1220000	900000	1260000	3180000	2760000	1180000	860000	2780000	1300000	1960000	1740000	740000	960000	1180000
1029876341	0	420000	240000	40000	0	0	0	0	0	0	0	0	60000	0	0	0	0	0	0	0	20000	2000000	0	0	0	0	0	0	0	0	0	0	0	0	0	0	0	0
1029542602	260000	1400000	520000	0	0	0	0	0	0	0	0	0	0	0	0	0	0	0	0	0	1520000	0	0	0	0	0	0	0	0	0	0	0	0	0	0	0	0	0
1021378874	0	1620000	2000000	260000	0	0	0	0	0	0	0	0	0	0	0	0	0	0	0	0	1660000	0	0	0	0	0	0	0	0	0	0	0	0	0	0	0	0	0
1029517312	280000	1360000	1820000	2480000	0	0	0	0	0	0	0	0	0	0	0	1460000	0	0	0	0	1520000	0	0	0	0	0	0	0	0	0	0	0	0	0	0	0	0	0
8230912	0	40000	60000	0	0	0	0	0	0	0	0	0	0	0	0	0	0	0	0	0	40000	0	40000	0	0	0	0	0	0	0	0	0	0	0	0	0	0	0
1029501274	0	1020000	420000	40000	0	0	0	0	20000	0	40000	0	0	300000	0	40000	0	0	0	0	1160000	0	0	0	0	0	0	0	0	0	0	0	0	0	0	0	0	60000
1030015014	80000	1360000	1380000	2820000	840000	0	0	0	1520000	1280000	1440000	0	0	2240000	0	1340000	0	0	0	0	1460000	0	0	0	0	0	0	0	0	0	0	1420000	0	0	2260000	0	0	1400000
1981330	260000	1100000	700000	1320000	1240000	1920000	0	0	1120000	1180000	1060000	1720000	1920000	2200000	0	900000	1520000	0	0	0	1300000	1980000	0	0	0	0	0	0	0	0	0	1440000	0	0	2160000	0	0	1260000
1021568899	260000	1400000	300000	0	0	0	0	0	0	0	0	0	0	0	0	0	0	0	0	0	1600000	0	0	0	0	0	0	0	0	0	0	0	0	0	0	0	0	0
1031303107	0	1360000	1420000	40000	0	0	0	0	40000	0	0	0	0	40000	0	40000	0	0	0	0	1620000	0	0	0	0	0	0	0	0	0	0	0	0	0	0	0	0	0
1021607068	80000	1520000	1540000	2260000	1240000	1940000	0	0	1580000	1260000	1440000	1660000	1900000	2280000	0	1480000	1620000	0	0	0	1020000	2020000	0	0	0	0	0	0	0	1080000	0	20000	0	0	2420000	0	960000	1720000
1021675621	0	1740000	1400000	3140000	0	0	0	0	3580000	0	1460000	0	0	2960000	0	3500000	0	0	0	0	1820000	0	0	0	0	0	0	0	0	0	0	0	0	0	0	0	0	660000
1021782978	0	1360000	1440000	260000	0	0	0	0	0	0	0	0	0	0	0	0	0	0	0	0	1480000	0	0	0	0	0	0	0	0	0	0	0	0	0	0	0	0	0
1030387265	260000	1360000	1380000	2420000	0	0	0	0	1520000	1160000	1460000	0	0	2240000	0	1480000	0	0	0	0	1500000	0	0	0	0	0	0	0	0	0	0	0	0	0	920000	0	0	1580000
1021818855	260000	1460000	1380000	2240000	0	0	780000	1180000	0	0	0	0	0	0	0	1080000	0	860000	1000000	1940000	1540000	0	1140000	0	0	0	20000	20000	1420000	0	0	0	0	0	0	0	0	0
1031307745	260000	1400000	1400000	2260000	0	0	0	0	2220000	0	0	0	0	1020000	0	1480000	0	0	0	0	1820000	0	0	60000	1760000	0	1760000	2480000	1340000	0	0	0	0	0	0	0	0	0
1029490705	0	1580000	580000	0	0	0	0	0	0	0	0	0	0	0	0	0	0	0	0	0	1580000	0	0	0	0	0	0	0	0	0	0	0	0	0	0	0	0	0
8324635	0	1020000	1380000	20000	0	0	0	0	0	0	0	0	0	0	0	0	0	0	0	0	920000	0	0	0	0	0	0	0	0	0	0	0	0	0	0	0	0	0
1749509	20000	1600000	1360000	2200000	0	0	0	0	1480000	0	620000	0	0	2200000	0	1460000	0	0	0	0	1960000	0	0	0	0	0	0	0	0	0	0	0	0	0	0	0	0	0
1029477544	180000	1340000	280000	0	0	0	0	0	0	0	0	0	0	0	0	0	0	0	0	0	1200000	0	0	0	0	0	0	0	0	0	0	0	0	0	0	0	0	0
1029477214	20000	1360000	400000	0	0	0	0	0	0	0	0	0	0	0	0	0	0	0	0	0	1480000	0	0	0	0	0	0	0	0	0	0	0	0	0	0	0	0	0
1021986965	80000	1000000	960000	1680000	980000	0	0	0	1200000	0	1060000	0	0	1520000	0	1040000	960000	0	0	0	660000	0	0	0	0	0	0	0	0	0	0	1200000	0	0	0	0	0	480000
1588230	0	1360000	1380000	240000	1240000	0	0	0	0	0	0	1680000	1880000	20000	0	0	1480000	0	0	0	1440000	1980000	0	0	0	0	0	0	0	0	0	1380000	800000	0	2160000	600000	1280000	1540000
1022264345	260000	1400000	1400000	500000	0	0	0	0	0	0	0	0	0	0	0	0	0	0	0	0	1520000	0	0	0	0	0	0	0	0	0	0	0	0	0	0	0	0	0
1022304139	120000	1280000	260000	20000	0	0	0	0	0	0	0	0	0	0	0	0	0	0	0	0	1520000	0	0	0	0	0	0	0	0	0	0	0	0	0	600000	0	0	0
12889843	200000	920000	20000	0	0	0	0	0	0	0	0	0	0	0	0	0	0	0	0	0	900000	0	0	0	0	0	0	0	0	0	0	0	0	0	0	0	0	0
12887041	0	920000	680000	100000	0	0	0	0	0	0	0	0	0	0	0	0	0	0	0	0	600000	0	0	0	0	0	0	0	0	0	0	0	0	0	0	0	0	0
1022584599	200000	920000	1140000	1780000	1300000	1700000	0	0	1300000	1060000	1140000	1380000	1820000	2000000	0	1240000	1240000	0	0	0	1060000	1700000	0	0	0	0	0	0	0	1100000	0	1180000	20000	0	1940000	0	1160000	1340000
1029440092	260000	1340000	1440000	2220000	1240000	1960000	0	0	1520000	1160000	1480000	1680000	1880000	2240000	0	1480000	1540000	0	0	0	1500000	1980000	20000	0	0	0	0	0	0	1300000	1060000	1420000	1240000	2020000	2160000	620000	1240000	1660000
12795250	0	1180000	1420000	2220000	0	0	0	0	1500000	0	0	0	0	0	0	1480000	0	0	0	0	1260000	0	0	0	0	0	0	0	0	0	0	0	0	0	0	0	0	0
1022955551	180000	2000000	1780000	2460000	1280000	1960000	880000	1560000	2440000	1360000	1900000	2440000	2700000	2960000	800000	1360000	1820000	1140000	480000	2780000	1980000	3200000	1700000	2100000	1160000	2780000	880000	1980000	1860000	1540000	1120000	1780000	1440000	1260000	3120000	1040000	1580000	2340000
1023025820	240000	1420000	1380000	1740000	1320000	2000000	280000	980000	1340000	1140000	1440000	1720000	2060000	100000	1400000	1420000	1480000	480000	1020000	640000	180000	2120000	1140000	1940000	1280000	2360000	1760000	2280000	2000000	1320000	1060000	1360000	1220000	20000	2200000	900000	1340000	1600000
12127459	260000	1140000	1160000	860000	0	0	0	0	0	0	0	0	0	0	0	0	0	0	0	0	1180000	0	0	0	0	0	0	0	0	0	0	0	0	0	0	0	0	0
11911606	0	400000	20000	0	0	0	0	0	0	0	0	0	0	0	0	0	0	0	0	0	0	0	0	0	0	0	0	0	0	0	0	0	0	0	0	0	0	0
1023386961	0	180000	1300000	2240000	0	0	0	0	0	0	0	0	0	0	0	1040000	0	0	0	0	0	0	0	0	0	0	0	0	0	0	0	0	0	0	0	0	0	0
1023394140	0	1100000	1200000	1740000	0	0	0	0	440000	0	0	0	0	240000	0	920000	0	0	0	0	1120000	0	0	0	0	0	0	0	0	0	0	0	0	0	0	0	0	0
1023459942	260000	1140000	1160000	1900000	0	0	0	0	1460000	0	0	0	0	0	0	1180000	0	0	0	0	1320000	0	0	0	0	0	0	0	0	0	0	0	0	0	0	0	0	0
1023507333	260000	1400000	1380000	1780000	1400000	1920000	800000	1160000	1480000	1200000	1160000	1680000	1880000	2020000	2120000	380000	1480000	1040000	1020000	4140000	1580000	1980000	1500000	1720000	1640000	160000	1920000	2380000	1540000	1300000	1260000	660000	1400000	2040000	1860000	840000	1280000	1520000
1023745139	260000	1520000	1700000	0	0	0	0	0	0	0	0	0	0	0	0	0	0	0	0	0	1660000	0	0	0	0	0	0	0	0	0	0	0	0	0	0	0	0	0
1023843211	0	2740000	2740000	3720000	1580000	2460000	840000	2060000	3060000	800000	1480000	5060000	1900000	2720000	2080000	1480000	2220000	1640000	1100000	2300000	1680000	3980000	40000	2140000	1700000	2380000	1620000	2560000	1380000	880000	680000	1400000	880000	1980000	2700000	640000	860000	1580000
1023962998	140000	580000	920000	1520000	740000	1100000	460000	560000	0	440000	0	1100000	1060000	0	0	200000	880000	500000	540000	460000	280000	1180000	500000	0	0	0	0	0	0	20000	0	820000	0	1020000	1340000	0	660000	0
1024107912	0	1340000	1240000	1660000	740000	0	0	0	1860000	1140000	1660000	0	0	2440000	0	2180000	0	0	0	0	1780000	0	0	0	0	0	0	0	0	0	0	1540000	0	0	2500000	0	0	1660000
1024318635	340000	1400000	1420000	2380000	2420000	1980000	600000	840000	1500000	1160000	1400000	1720000	1820000	2240000	1660000	1520000	1480000	780000	820000	580000	1620000	1980000	940000	1700000	1380000	1960000	20000	460000	1260000	1300000	620000	1400000	1020000	1600000	2160000	540000	1240000	1560000
11314636	240000	1360000	1420000	1880000	1220000	180000	780000	220000	940000	900000	1300000	1680000	140000	2060000	1660000	1480000	20000	440000	480000	120000	1600000	940000	1000000	280000	1700000	520000	20000	20000	260000	340000	800000	1400000	1280000	920000	1700000	620000	500000	1520000
11314504	160000	1760000	1600000	2240000	0	0	0	0	1560000	1100000	1340000	0	0	2180000	0	540000	0	0	0	0	1600000	0	0	0	0	0	0	0	0	0	0	0	0	0	0	0	0	1400000
1029328031	260000	2560000	1380000	2240000	0	0	0	0	0	0	0	0	0	0	0	860000	0	0	0	0	1540000	0	0	0	0	0	0	0	0	0	0	0	0	0	0	0	0	0
1024363563	140000	1440000	60000	0	0	0	0	0	0	0	0	0	0	0	0	0	0	0	0	0	1480000	0	0	0	0	0	0	0	0	0	0	0	0	0	0	0	0	0
1024522766	0	0	500000	1700000	480000	0	0	0	840000	580000	860000	0	0	1540000	0	980000	0	0	0	0	0	0	0	0	0	0	0	0	0	0	0	1180000	0	0	1180000	0	0	940000
11053283	0	1440000	120000	0	0	0	0	0	0	0	0	0	0	0	0	0	0	0	0	0	1460000	0	0	0	0	0	0	0	0	0	0	0	0	0	0	0	0	0
10945871	240000	1440000	1160000	1680000	900000	1460000	720000	420000	1260000	1160000	1500000	1380000	1660000	2220000	1360000	1380000	20000	560000	740000	200000	1300000	1720000	1140000	980000	1060000	1640000	1100000	1220000	900000	880000	620000	1000000	780000	1240000	2120000	300000	880000	1460000
1024761316	180000	1260000	1180000	1880000	0	2160000	1120000	1620000	1040000	40000	0	1720000	40000	1260000	20000	1220000	0	1400000	1040000	2720000	1240000	2000000	920000	860000	1900000	0	1800000	2620000	2340000	1180000	1120000	0	960000	2260000	0	900000	1000000	0
1024828147	180000	720000	600000	2040000	0	0	0	0	0	0	0	0	0	0	0	20000	0	0	0	0	860000	0	0	0	0	0	0	0	0	0	0	0	0	0	0	0	0	0
1024856667	0	1480000	1580000	2240000	1240000	2140000	0	0	1620000	1200000	1460000	1680000	2000000	2220000	0	1480000	1480000	0	0	0	1080000	2040000	0	0	0	0	0	0	0	1300000	740000	1460000	740000	1680000	2220000	580000	1300000	1600000
1031592480	0	1360000	1380000	60000	0	0	0	0	0	0	0	0	0	0	0	0	0	0	0	0	1480000	0	0	0	0	0	0	0	0	0	0	0	0	0	0	0	0	0
1025068296	0	2420000	1560000	3360000	1220000	0	0	0	3100000	800000	1600000	0	0	3100000	0	3600000	2260000	0	0	0	2460000	20000	0	0	0	0	0	0	0	0	0	1400000	0	0	1200000	0	0	1700000
1029203981	220000	1080000	20000	880000	0	0	0	0	20000	0	0	0	0	0	0	40000	20000	0	0	0	1000000	0	0	0	0	0	0	0	0	0	0	0	0	0	0	0	0	0
950993	260000	1000000	540000	160000	0	0	0	0	0	0	0	0	0	0	0	0	0	0	0	0	1220000	0	0	0	0	0	0	0	0	0	0	0	0	0	0	0	0	0
10367606	180000	40000	40000	40000	40000	0	0	0	20000	40000	20000	20000	0	60000	0	20000	20000	0	0	0	660000	20000	0	0	0	0	0	0	0	0	0	40000	0	0	40000	0	0	0
1029169658	0	1460000	1380000	2340000	0	0	0	0	0	20000	0	0	0	0	0	60000	0	0	0	0	980000	0	0	0	0	0	0	0	200000	0	0	0	0	0	0	0	0	0
9527246	280000	1440000	1540000	2240000	0	1920000	480000	260000	0	0	0	1680000	1900000	0	0	60000	0	260000	1460000	100000	1740000	2700000	1160000	0	0	0	0	0	0	1300000	1060000	0	1280000	2180000	0	960000	1280000	0
1025493094	0	1720000	220000	0	0	0	0	0	0	0	0	0	0	0	0	0	0	0	0	0	1800000	0	0	0	0	0	0	0	0	0	0	0	0	0	0	0	0	0
1029131408	260000	1400000	1280000	1340000	1280000	2040000	0	0	1420000	1280000	1460000	1820000	2040000	2400000	0	1560000	1480000	0	0	0	1560000	2120000	0	0	0	0	0	0	0	0	0	1720000	0	0	2520000	0	20000	1620000
1025554852	120000	1540000	1140000	2380000	0	0	0	0	1740000	1280000	1660000	0	0	2440000	0	1660000	0	0	0	0	1800000	0	0	0	0	0	0	0	0	0	0	20000	0	0	2220000	0	0	1920000
1025571301	260000	1360000	1140000	1800000	1040000	0	0	0	1360000	860000	1220000	0	0	1780000	0	1200000	120000	0	0	0	1180000	1980000	0	0	0	0	0	0	0	0	0	1020000	0	0	1880000	0	0	1280000
1029906392	180000	1360000	1620000	2460000	1300000	0	0	0	1520000	1620000	1440000	0	0	2300000	0	1580000	1480000	0	0	0	1300000	0	0	0	0	0	0	0	0	0	0	1460000	0	0	2180000	0	0	1780000
1029116843	240000	1340000	1340000	2220000	1260000	0	0	0	1560000	1160000	1440000	40000	0	2200000	0	1460000	1480000	0	0	0	1380000	2020000	0	0	0	0	0	0	0	0	0	1460000	0	0	2080000	0	0	1580000
1029049383	140000	440000	600000	1080000	0	0	0	0	600000	0	560000	0	0	1060000	0	420000	0	0	0	0	440000	0	0	0	0	0	0	0	0	0	0	0	0	0	0	0	0	620000
1025866122	120000	940000	1060000	1080000	0	0	0	0	0	0	0	0	0	0	0	0	0	0	0	0	1280000	0	0	0	0	0	0	0	0	0	0	0	0	0	0	0	0	0
1032885619	260000	1400000	1380000	140000	0	0	0	0	0	0	0	0	0	0	0	0	0	0	0	0	1500000	0	0	0	0	0	0	0	0	0	0	0	0	0	0	0	0	0
1032867556	0	1360000	20000	2240000	1240000	1920000	0	0	1520000	1200000	1420000	1040000	1940000	1160000	0	1480000	60000	0	0	2400000	20000	0	0	0	0	0	400000	2300000	2880000	1300000	340000	1400000	2560000	0	2160000	840000	2600000	1600000
1028937018	0	1360000	20000	0	0	0	0	0	780000	0	1440000	0	0	2400000	0	0	0	0	0	0	1500000	0	0	0	0	0	0	0	0	0	0	0	0	0	0	0	0	580000
1026214519	260000	1360000	40000	0	0	0	0	0	0	0	0	0	0	0	0	0	0	0	0	0	1500000	0	0	0	0	0	0	0	0	0	0	0	0	0	0	0	0	0
1026326704	140000	640000	820000	1300000	960000	0	0	0	1060000	820000	980000	0	0	1300000	0	1180000	480000	0	0	0	720000	0	0	0	0	0	0	0	0	0	0	920000	0	0	1820000	0	0	1040000
1014765953	0	1600000	420000	0	0	0	0	0	0	0	0	0	0	0	0	0	0	0	0	0	260000	0	0	0	0	0	0	0	0	0	0	0	0	0	0	0	0	0
1028838942	260000	1320000	1480000	2260000	0	0	0	0	2360000	0	0	0	0	660000	0	1660000	0	0	0	0	1720000	0	0	0	0	0	0	0	0	0	0	0	0	0	0	0	0	0
1032710524	0	1440000	340000	0	0	1920000	0	0	0	1160000	740000	0	460000	0	0	0	0	0	0	280000	1560000	0	0	0	0	0	0	0	1320000	1300000	680000	2220000	1280000	0	2200000	840000	1280000	1580000
1032710461	140000	1360000	2760000	2220000	1240000	1920000	0	0	0	1160000	1440000	1680000	1880000	2240000	0	980000	1480000	0	0	0	860000	3000000	0	0	0	0	0	0	0	1300000	0	2000000	600000	0	2160000	0	1280000	1580000
1032690071	240000	1540000	1460000	860000	0	0	0	0	1680000	0	0	0	0	580000	0	1740000	0	0	0	0	1960000	0	0	0	0	0	0	0	0	0	0	0	0	0	0	0	0	0
1032661442	0	1340000	60000	0	1000000	4000000	0	0	1180000	1220000	600000	18100000	2720000	4680000	0	0	1180000	0	860000	0	1540000	4460000	3140000	0	0	0	0	0	0	1720000	0	1140000	1700000	2660000	2520000	20000	1740000	500000
1030689729	0	1360000	1180000	0	0	0	0	0	0	0	0	0	0	0	0	0	0	0	0	0	1280000	0	0	0	0	0	0	0	0	0	0	0	0	0	0	0	0	0
1030068717	0	1260000	1100000	80000	0	0	0	0	0	0	0	0	0	520000	0	0	0	0	0	0	1580000	0	0	0	0	0	0	0	0	0	0	0	0	0	0	0	0	0
1030074594	0	1160000	680000	0	0	0	0	0	0	0	0	0	0	0	0	0	0	0	0	0	1040000	0	0	0	0	0	0	0	0	0	0	0	0	0	0	0	0	0
1028548249	0	880000	460000	0	0	0	0	0	0	0	0	0	0	0	0	0	0	0	0	0	0	0	0	0	0	0	0	0	0	0	0	0	0	0	0	0	0	0
1028520104	0	20000	1640000	1520000	0	0	0	0	0	0	0	0	0	0	0	0	0	0	0	0	440000	0	0	0	0	0	0	0	0	0	0	0	0	0	0	0	0	0
1030135619	260000	1360000	1360000	1960000	0	0	0	0	0	0	0	0	0	0	0	0	0	0	0	0	1500000	0	0	0	0	0	0	0	0	0	0	0	0	0	0	0	0	0
1014305386	140000	1400000	1300000	1040000	0	0	0	0	0	0	0	0	0	0	0	60000	0	0	0	0	960000	0	0	0	0	0	0	0	0	0	0	0	0	0	0	0	0	0
1028433857	100000	1100000	1160000	2320000	0	0	0	0	940000	0	0	0	0	520000	0	1020000	0	0	0	0	420000	0	0	0	0	0	0	0	0	0	0	0	0	0	0	0	0	0
1028402129	0	620000	980000	500000	0	0	0	0	80000	0	0	0	0	0	0	400000	0	0	0	0	980000	0	0	0	0	0	0	0	0	0	0	0	0	0	0	0	0	0
1027218727	0	0	1340000	2280000	0	0	0	0	1080000	1240000	1460000	0	0	2260000	0	1460000	0	0	0	0	20000	0	0	0	0	0	0	0	0	0	0	1480000	0	0	2520000	0	0	1160000
1028355371	0	100000	500000	0	0	0	0	0	0	0	0	0	0	0	0	0	0	0	0	0	1100000	0	0	0	0	0	0	0	0	0	0	0	0	0	0	0	0	0
1032323724	0	540000	1220000	880000	0	0	0	0	0	0	0	0	0	0	0	0	0	0	0	0	0	0	0	0	0	0	0	0	0	0	0	0	0	0	0	0	0	0
1027223413	140000	1420000	1540000	2380000	0	0	0	0	0	0	80000	0	0	0	0	520000	0	0	0	0	1700000	0	0	0	0	0	0	0	0	0	0	0	0	0	0	0	0	0
1028252892	20000	1520000	1380000	2240000	0	0	0	0	340000	0	0	0	0	0	0	1020000	0	0	0	0	1560000	0	0	0	0	0	0	0	0	0	0	0	0	0	0	0	0	0
1028228406	0	0	40000	820000	0	0	0	0	580000	0	0	0	0	0	0	820000	0	0	0	0	0	0	0	0	0	0	0	0	0	0	0	0	0	0	0	0	0	0
1027253593	120000	1460000	900000	60000	1500000	2080000	680000	1440000	1900000	1320000	1380000	1140000	1940000	2540000	0	2220000	1640000	640000	1000000	1760000	1100000	2180000	1200000	0	0	0	0	0	0	580000	540000	1620000	600000	1340000	2500000	760000	1180000	1740000
1030134368	0	20000	1400000	1500000	0	0	0	0	20000	0	0	0	0	0	0	1020000	0	0	0	0	0	0	0	0	0	0	0	0	0	0	0	0	0	0	0	0	0	0
1028199072	40000	20000	20000	1980000	0	0	0	0	160000	0	1920000	0	0	2940000	0	1120000	0	0	0	0	20000	0	0	0	1700000	0	1820000	5300000	10000000	0	0	0	0	0	0	0	0	840000
1028197287	0	1380000	1380000	1320000	0	0	0	0	1540000	0	1420000	0	0	2260000	0	1440000	0	0	0	0	100000	0	0	0	0	0	0	0	0	0	0	0	0	0	0	0	0	1200000
1028175375	260000	80000	540000	1440000	0	0	0	0	0	0	0	0	0	0	0	0	0	0	0	0	0	0	0	0	0	0	0	0	0	0	0	0	0	0	0	0	0	0
1027315116	260000	1060000	1140000	60000	0	0	0	0	0	0	0	0	0	0	0	0	0	0	0	0	1500000	0	0	0	0	0	0	0	0	0	0	0	0	0	0	0	0	0
1032092332	260000	580000	480000	2240000	1260000	2020000	960000	1260000	1600000	1240000	1700000	1780000	3240000	2180000	2120000	1480000	1600000	1300000	1060000	2220000	1500000	1980000	1420000	2540000	1760000	2600000	2600000	2960000	2040000	1460000	1420000	1520000	1280000	2020000	2660000	1000000	1600000	1740000
1028106243	320000	1420000	940000	0	0	0	0	0	0	0	0	0	0	0	0	0	0	0	0	0	1640000	0	0	0	0	0	0	0	0	0	0	0	0	0	0	0	0	0
1014249091	0	1440000	1400000	2240000	0	0	0	0	160000	0	0	0	0	0	0	1660000	0	0	0	0	1500000	0	0	0	0	0	0	0	0	0	0	0	0	0	0	0	0	0
1032168073	40000	40000	20000	60000	40000	80000	40000	40000	20000	20000	20000	40000	40000	40000	0	60000	40000	40000	40000	40000	40000	40000	40000	0	0	0	0	0	20000	40000	40000	40000	20000	40000	80000	40000	40000	40000
1027663028	260000	1800000	1760000	1520000	980000	0	0	0	1520000	1120000	60000	0	0	1580000	0	1640000	1520000	0	0	0	1600000	0	0	0	0	0	0	0	0	0	0	900000	0	0	2000000	0	0	0
1027997743	60000	1080000	940000	1640000	740000	1120000	1320000	2120000	0	700000	0	1100000	1240000	0	0	820000	900000	1640000	1300000	1020000	1000000	1740000	1240000	0	0	0	0	0	580000	760000	540000	820000	740000	1240000	1360000	500000	1460000	0
1032142051	60000	40000	20000	20000	920000	0	600000	1500000	40000	640000	40000	1400000	480000	160000	1400000	80000	1080000	640000	820000	1660000	160000	1480000	900000	40000	0	2540000	0	0	80000	0	0	1060000	160000	480000	1700000	0	0	1100000
1027695269	260000	1880000	1400000	2280000	320000	0	0	0	2380000	3500000	1820000	0	0	3220000	0	1600000	0	0	0	0	3040000	0	0	0	0	0	0	0	0	0	0	1860000	0	0	4700000	0	0	2000000
1017090269	260000	1500000	1380000	2120000	0	0	0	0	0	1200000	1040000	0	0	2180000	0	120000	0	0	0	0	1540000	0	0	0	0	0	0	0	0	0	0	60000	0	0	2400000	0	0	1740000
1017102830	280000	1640000	1420000	2320000	0	0	0	0	0	0	0	0	0	0	0	400000	0	0	0	0	1660000	0	0	0	0	0	0	0	0	0	0	0	0	0	0	0	0	0
1017121112	40000	1360000	1720000	2380000	600000	180000	0	0	1880000	960000	860000	1700000	2120000	1440000	0	1540000	1440000	0	0	0	1480000	1980000	0	0	0	0	0	0	0	0	0	1240000	0	0	1600000	0	0	1460000
1029938939	0	0	20000	0	0	0	0	0	0	0	0	0	0	0	0	0	0	0	0	0	60000	0	0	0	0	0	0	0	0	0	0	0	0	0	0	0	0	0
1020498050	40000	1360000	1440000	2240000	0	0	0	0	0	0	0	0	0	0	0	20000	0	0	0	0	1220000	0	0	0	0	0	0	0	0	0	0	0	0	0	0	0	0	0
1017587055	100000	1220000	1180000	1860000	0	0	0	0	1240000	0	20000	0	0	1960000	0	1400000	0	0	0	0	1260000	0	0	0	0	0	0	0	0	0	0	0	0	0	0	0	0	860000
1024363569	180000	980000	600000	0	0	0	0	0	0	0	0	0	0	0	0	0	0	0	0	0	1020000	0	0	0	0	0	0	0	0	0	0	0	0	0	0	0	0	0
1029376009	140000	1520000	1400000	1420000	0	0	0	0	0	0	0	0	0	0	0	0	0	0	0	0	1640000	0	0	0	0	0	0	0	0	0	0	0	0	0	0	0	0	0
1024374693	160000	1940000	1420000	2200000	0	0	0	0	0	0	0	0	0	0	0	0	0	0	0	0	3000000	0	0	0	0	0	0	0	0	0	0	0	0	0	0	0	0	0
1029691371	300000	1440000	1480000	1160000	640000	1300000	380000	520000	960000	600000	740000	1140000	1260000	1660000	1040000	40000	760000	500000	540000	1120000	1700000	1360000	720000	1260000	1080000	1240000	1180000	1700000	1860000	1300000	1020000	680000	1280000	2000000	1100000	840000	1280000	800000
1029327674	220000	1100000	1140000	1200000	0	0	0	0	0	0	0	0	0	0	0	0	0	0	0	0	1200000	0	0	0	0	0	0	0	0	0	0	0	0	0	0	0	0	0
1021995914	0	1380000	1440000	1940000	0	0	0	0	960000	0	0	0	0	1360000	0	920000	0	0	0	0	560000	0	0	0	0	0	0	0	0	0	0	0	0	0	0	0	0	0
1029479878	280000	1440000	1460000	2500000	0	0	0	0	1760000	0	0	0	0	0	0	1840000	0	0	0	0	1640000	0	0	0	0	0	0	0	0	0	0	0	0	0	0	0	0	0
1027226014	40000	1800000	640000	1880000	0	0	0	0	0	0	0	0	0	0	0	0	0	0	0	0	2020000	700000	0	0	0	0	0	0	0	0	0	0	0	0	0	0	0	0
1018718027	220000	920000	920000	1500000	1120000	1380000	560000	920000	1320000	740000	980000	1100000	620000	1680000	0	1080000	1740000	640000	700000	620000	1000000	2860000	780000	0	0	0	0	0	0	960000	760000	1380000	860000	1960000	1500000	580000	940000	1400000
1175674	0	1120000	1140000	0	0	0	0	0	0	0	0	0	0	0	0	0	0	0	0	0	820000	0	0	0	0	0	0	0	0	0	0	0	0	0	0	0	0	0
1025561593	180000	740000	1500000	3000000	1300000	2360000	0	0	1820000	1260000	0	1380000	1820000	2920000	0	1520000	1740000	0	0	0	1300000	1800000	0	0	0	0	0	0	0	1000000	1000000	1480000	1060000	280000	2480000	1040000	720000	1660000
1030453498	140000	1400000	1400000	2260000	1300000	980000	780000	80000	0	1380000	40000	1680000	1880000	120000	0	20000	1480000	980000	1040000	0	280000	2100000	1160000	260000	0	0	680000	2340000	1780000	1340000	1160000	1620000	1280000	2440000	2460000	840000	1280000	1320000
5321673	320000	1240000	2120000	2260000	1020000	1680000	540000	880000	1520000	1240000	1460000	1380000	1600000	2280000	0	420000	1240000	680000	580000	1060000	1280000	1620000	800000	0	0	0	0	0	40000	900000	600000	1140000	920000	1380000	2100000	580000	980000	1660000
1023953257	200000	1340000	1300000	2280000	0	0	0	0	1580000	100000	2120000	0	0	2360000	0	1380000	0	0	0	0	1680000	0	0	0	0	0	0	0	0	0	0	0	0	0	40000	0	0	1800000
1028463728	0	360000	1460000	2600000	0	0	0	0	2120000	280000	1560000	1900000	0	2800000	0	3060000	0	0	0	0	60000	660000	0	0	0	0	0	0	0	0	0	0	0	0	0	0	0	1820000
1029599749	260000	940000	960000	1780000	0	0	0	0	160000	960000	1320000	0	0	1460000	0	1420000	0	0	0	0	1240000	0	0	0	0	0	0	0	0	0	0	0	0	0	380000	0	0	1540000
1018692644	100000	1440000	1440000	40000	0	0	0	0	0	0	0	0	0	0	0	0	0	0	0	0	1620000	0	0	0	0	0	0	0	0	0	0	0	0	0	0	0	0	0
1031192570	40000	1720000	1320000	2300000	1100000	0	0	0	1820000	700000	600000	1980000	540000	1160000	0	1460000	1080000	0	0	0	1660000	1060000	0	0	0	0	0	0	0	0	0	1340000	0	0	1160000	0	0	1020000
1029201185	0	1140000	320000	0	0	0	0	0	0	0	0	0	0	0	0	0	0	0	0	0	1120000	0	0	0	0	0	0	0	0	0	0	0	0	0	0	0	0	0
1028223216	40000	1060000	1840000	1860000	1020000	1760000	680000	940000	1760000	1220000	1140000	1120000	1420000	1900000	1780000	1620000	1180000	880000	600000	0	1280000	1680000	820000	0	0	1940000	0	0	0	720000	740000	1480000	800000	1280000	1940000	660000	1680000	1600000
1015906911	280000	1340000	1360000	560000	0	0	0	0	1560000	0	0	0	0	240000	0	1700000	0	0	0	0	1260000	0	0	0	0	0	0	0	0	0	0	0	0	0	0	0	0	0
1028789617	220000	1380000	1820000	600000	0	0	0	0	0	0	0	0	0	0	0	0	0	0	0	0	1380000	0	0	0	0	0	0	0	0	0	0	0	0	0	20000	0	0	0
1018216471	280000	1460000	1480000	2300000	0	0	0	0	1680000	460000	1100000	0	0	1880000	0	1440000	0	0	0	0	1320000	0	0	0	0	0	0	0	0	0	0	0	0	0	0	0	0	1700000
9277332	0	800000	880000	1440000	820000	1420000	0	0	980000	840000	960000	1260000	1100000	1380000	0	1320000	840000	0	0	0	480000	0	0	0	0	0	0	0	0	0	0	1000000	0	0	1440000	0	0	1020000
1027333341	160000	640000	960000	1620000	0	0	0	0	1320000	880000	1300000	0	0	1320000	0	1040000	0	0	0	0	720000	0	0	0	0	0	0	0	0	0	0	700000	0	0	1900000	0	0	1240000
1024116864	260000	1200000	1120000	1860000	1240000	2040000	0	0	20000	1300000	1520000	1860000	1980000	2320000	0	1240000	1520000	0	0	0	1300000	2080000	0	0	0	0	0	0	0	1340000	40000	1440000	1280000	0	1320000	840000	1800000	1680000
1024923501	0	980000	1020000	1620000	0	0	0	0	120000	0	0	0	0	0	0	1140000	0	0	0	0	1120000	0	0	0	0	0	0	0	0	0	0	0	0	0	0	0	0	0
1030403143	0	1060000	1240000	1440000	1320000	2140000	0	0	380000	1020000	1240000	1500000	2260000	1940000	0	960000	1020000	0	0	0	1460000	2740000	0	0	0	0	0	0	0	0	0	1940000	0	0	2220000	0	0	1320000
1026618399	0	900000	1240000	2260000	1320000	1700000	720000	1480000	0	960000	0	1540000	1600000	0	0	0	1480000	920000	840000	1640000	0	1760000	1160000	2240000	1360000	960000	1520000	2020000	1580000	1140000	920000	1400000	1160000	1700000	1900000	780000	1080000	0
1829887	0	1440000	20000	3460000	1220000	2040000	1040000	1600000	2060000	1820000	2000000	1940000	2020000	2560000	0	1780000	1780000	1060000	1480000	2880000	1820000	2300000	3320000	0	0	0	0	0	120000	2400000	1500000	2280000	4020000	2440000	1800000	1740000	3080000	1800000
8009552	0	1080000	1980000	100000	0	0	0	0	0	0	0	0	0	0	0	0	0	0	0	0	1460000	0	0	0	0	0	0	0	0	0	0	0	0	0	0	0	0	0
1029146141	140000	1200000	1140000	1860000	1300000	1920000	0	0	200000	1240000	1480000	1720000	1900000	2280000	0	1380000	1500000	0	0	0	740000	2080000	20000	0	0	0	0	0	0	1060000	1060000	1760000	1280000	2060000	2240000	840000	680000	1580000
1014952078	200000	1420000	800000	0	0	0	0	0	0	0	0	0	0	0	0	0	0	0	0	0	1460000	0	0	0	0	0	0	0	0	0	0	0	0	0	0	0	0	0
1029342947	160000	1300000	1320000	1980000	0	0	0	0	0	0	0	0	0	0	0	1720000	0	0	0	0	860000	0	0	0	0	0	0	0	0	0	0	0	0	0	0	0	0	0
1027703465	0	820000	960000	20000	0	0	0	0	0	0	0	0	0	0	0	0	0	0	0	0	680000	0	0	0	0	0	0	0	0	0	0	0	0	0	0	0	0	0
1031006666	220000	1660000	800000	40000	0	0	0	0	1800000	1160000	0	0	0	140000	0	1800000	0	0	0	0	1800000	0	0	0	0	0	0	0	0	0	0	0	0	0	780000	0	0	0
1030254200	280000	1400000	1400000	2300000	0	0	0	0	1380000	1240000	1440000	0	0	2320000	0	1300000	0	0	0	0	1600000	0	0	0	0	0	0	0	0	0	0	200000	0	0	1320000	0	0	1800000
10907552	260000	1420000	1460000	2280000	1280000	1820000	740000	1260000	1600000	1140000	1460000	1740000	1480000	2480000	1840000	860000	1520000	1000000	1080000	2220000	1540000	2040000	1200000	1740000	1720000	2300000	1840000	2360000	2040000	1300000	1080000	40000	1300000	2020000	2180000	880000	1340000	1760000
1030553554	140000	1380000	1660000	2820000	680000	0	0	0	1860000	880000	1600000	0	0	2980000	0	2220000	100000	0	0	0	2400000	0	0	0	0	0	0	0	0	0	0	800000	0	0	1560000	0	0	1620000
1029036288	60000	1060000	1200000	660000	0	0	0	0	0	0	0	0	0	0	0	0	0	0	0	0	1080000	0	0	0	0	0	0	0	0	0	0	0	0	0	0	0	0	0
1029322208	0	1080000	40000	0	0	0	0	0	0	0	0	0	0	0	0	0	0	0	0	0	1180000	0	0	0	0	0	0	0	0	0	0	0	0	0	0	0	0	0
1025689149	380000	1560000	1080000	0	0	0	0	0	0	0	0	0	0	0	0	0	0	0	0	0	1920000	0	0	0	0	0	0	0	0	0	0	0	0	0	0	0	0	0
1019687131	0	0	40000	20000	0	0	0	0	0	0	0	0	0	0	0	0	0	0	0	0	0	0	0	0	0	0	0	0	0	0	0	0	0	0	0	0	0	0
1026735872	0	1140000	1420000	1500000	1000000	1360000	540000	840000	1020000	960000	1000000	1240000	1280000	1500000	0	1080000	1220000	660000	840000	60000	1300000	1320000	820000	0	0	0	0	0	0	920000	1140000	1420000	1120000	2040000	1760000	1040000	880000	1300000
1018332816	0	1360000	1340000	2220000	0	0	0	0	180000	0	0	0	0	0	0	1520000	0	0	0	0	1300000	0	0	0	0	0	0	0	0	0	0	0	0	0	0	0	0	0
1026920122	260000	1360000	940000	2220000	0	0	0	0	0	0	0	0	0	0	0	620000	0	0	0	0	1480000	0	0	0	0	0	0	0	0	0	0	0	0	0	0	0	0	0
10867553	280000	1380000	1380000	2380000	0	0	0	0	0	0	0	0	0	20000	0	1240000	0	0	0	0	1380000	0	0	0	0	0	0	0	0	0	0	0	0	0	0	0	0	0
5929972	240000	1600000	1700000	1840000	0	0	0	0	0	0	0	0	0	0	0	40000	0	0	0	0	2560000	0	0	0	0	0	0	0	0	0	0	0	0	0	0	0	0	0
1021146471	0	700000	700000	1140000	1240000	0	0	0	780000	1780000	740000	1700000	1880000	1140000	0	760000	1480000	0	0	0	760000	1980000	0	0	0	0	0	0	20000	0	0	1420000	0	0	2860000	0	0	800000
10994570	260000	1220000	1180000	1840000	0	0	0	0	1240000	1080000	1160000	0	0	1800000	0	1200000	0	0	0	0	1620000	0	0	0	0	0	0	0	0	0	0	0	0	0	40000	0	0	1320000
1016957154	0	1160000	1340000	1740000	0	1340000	0	0	1120000	160000	980000	1220000	1280000	1580000	0	1080000	0	0	0	0	0	1340000	0	0	0	0	0	0	0	0	0	0	0	0	0	0	0	1240000
1029920879	200000	1080000	1080000	1840000	0	0	0	0	1060000	920000	860000	0	0	1320000	0	1120000	0	0	0	0	1240000	0	0	0	0	0	0	0	0	0	0	900000	0	0	2180000	0	0	1120000
639180	280000	1420000	1460000	2260000	1240000	1940000	820000	1280000	1600000	1120000	1520000	1720000	1900000	1560000	1900000	1540000	1560000	1080000	1420000	2220000	1520000	2240000	1320000	1160000	1880000	1660000	1840000	2460000	2060000	1360000	1340000	1420000	1420000	2040000	2220000	860000	1320000	1660000
1029880157	260000	1480000	1280000	1820000	2480000	2320000	460000	0	3220000	980000	1340000	1740000	1740000	2640000	0	2060000	2040000	1100000	1980000	0	1720000	2040000	1100000	0	0	0	0	0	0	1400000	1060000	1420000	1280000	1920000	1200000	780000	1800000	1720000
1029639117	40000	1500000	1340000	540000	0	0	0	0	0	0	0	0	0	0	0	0	0	0	0	0	1620000	0	0	0	0	0	0	0	0	0	0	0	0	0	0	0	0	0
1032903928	260000	1360000	1380000	2260000	0	0	0	0	1520000	0	1160000	0	0	2300000	0	1800000	0	0	0	0	1520000	0	0	0	0	0	0	0	0	0	0	0	0	0	0	0	0	0
1030452622	300000	720000	860000	1440000	640000	1180000	740000	1220000	880000	760000	820000	860000	1000000	1220000	940000	800000	1000000	760000	620000	1100000	860000	1100000	820000	840000	920000	840000	900000	1260000	1180000	700000	560000	840000	660000	1080000	1120000	480000	680000	840000
2258547	0	800000	180000	1520000	0	0	0	0	0	0	0	0	0	0	0	600000	0	0	0	0	1100000	0	0	0	0	0	0	0	0	0	0	0	0	0	0	0	0	0
1029687789	100000	20000	580000	1100000	0	0	0	0	0	0	0	0	0	0	0	100000	0	0	0	0	1500000	0	0	0	0	0	0	0	0	0	0	0	0	0	0	0	0	0
7929725	0	1440000	1380000	2240000	0	0	0	0	1260000	0	1420000	0	0	2240000	0	1480000	0	0	0	0	1540000	0	0	0	0	0	0	0	0	0	0	0	0	0	0	0	0	620000
1025063994	160000	700000	700000	1140000	20000	20000	20000	40000	60000	20000	40000	20000	20000	40000	20000	60000	20000	80000	0	40000	720000	20000	0	20000	20000	40000	40000	40000	20000	20000	20000	20000	20000	20000	20000	20000	20000	40000
1029501052	60000	1200000	1120000	1800000	0	0	0	0	20000	0	0	0	0	0	0	1200000	0	0	0	0	1260000	0	0	0	0	0	0	0	0	0	0	0	0	0	0	0	0	0
1029927041	0	940000	880000	1040000	0	0	0	0	0	0	0	0	0	0	0	0	0	0	0	0	180000	0	0	0	0	0	0	0	0	0	0	0	0	0	0	0	0	0
1028016937	0	1540000	1360000	2200000	1340000	0	0	0	1640000	1220000	1420000	0	0	2300000	0	1580000	1520000	0	0	0	1200000	20000	0	0	0	0	0	0	0	0	0	1140000	0	0	520000	0	0	1600000
1017735009	240000	1520000	1760000	2100000	0	0	0	0	1560000	0	1680000	0	0	2400000	0	1540000	0	0	0	0	1540000	0	0	0	0	0	0	0	0	0	0	0	0	0	0	0	0	1440000
1028405618	220000	1240000	1240000	0	0	0	0	0	0	0	0	0	0	0	0	0	0	0	0	0	1560000	0	0	0	0	0	0	0	0	0	0	0	0	0	0	0	0	0
1028055019	200000	660000	1100000	1980000	0	0	0	0	1280000	0	1200000	0	0	1920000	0	1300000	0	0	0	0	500000	0	0	0	0	0	0	0	0	0	0	0	0	0	0	0	0	1400000
1023671588	0	0	1160000	1820000	580000	820000	0	860000	840000	0	60000	1760000	320000	60000	0	1040000	1060000	700000	680000	1860000	0	20000	860000	0	0	0	0	420000	180000	780000	680000	540000	840000	1360000	1440000	560000	860000	20000
12833419	180000	860000	920000	40000	0	0	0	0	0	0	0	0	0	0	0	0	0	0	0	0	1120000	0	0	0	0	0	0	0	0	0	0	0	0	0	0	0	0	0
9552185	0	800000	700000	1240000	0	0	0	0	260000	60000	0	0	0	0	0	1020000	0	0	0	0	780000	0	0	0	0	0	0	0	0	0	0	0	0	0	0	0	0	0
1028833815	260000	2240000	1420000	2420000	0	0	0	0	820000	0	0	0	0	100000	0	1340000	0	0	0	0	1920000	0	0	0	0	0	0	0	0	0	0	0	0	0	0	0	0	0
1030219535	0	1220000	1540000	1480000	1020000	1460000	740000	960000	900000	1060000	1280000	1460000	1720000	2040000	0	760000	1300000	1020000	860000	1800000	1420000	2220000	1200000	40000	1320000	0	2000000	2180000	2280000	1060000	1000000	1340000	1140000	1840000	1400000	740000	1140000	1560000
1026972460	260000	1360000	840000	0	0	0	0	0	1540000	0	1440000	0	0	2260000	0	1360000	0	0	0	0	1520000	0	0	0	0	0	0	0	0	0	0	0	0	0	0	0	0	820000
11197019	0	0	60000	0	0	0	0	0	0	0	0	0	0	0	0	0	0	0	0	0	0	0	0	0	0	0	0	0	0	0	0	0	0	0	0	0	0	0
1029715053	0	1660000	1500000	1140000	0	0	0	0	0	0	0	0	0	0	0	0	0	0	0	0	40000	0	0	0	0	0	0	0	0	0	0	0	0	0	0	0	0	0
1014646751	40000	2760000	2440000	3640000	1060000	2380000	860000	1700000	1460000	1160000	1880000	1300000	1960000	2220000	0	1360000	1260000	520000	1020000	2660000	3580000	1680000	1820000	1720000	1920000	300000	1380000	2360000	2240000	1240000	980000	1400000	1240000	2100000	2140000	680000	1460000	980000
1030177802	0	0	40000	160000	0	0	0	0	0	0	0	0	0	0	0	200000	0	0	0	0	400000	0	0	0	0	0	0	0	0	0	0	0	0	0	0	0	0	0
1024732600	60000	1440000	1380000	2240000	1300000	1940000	0	0	1540000	1180000	1440000	0	80000	2280000	0	1480000	1480000	0	0	0	1440000	660000	0	0	0	0	0	0	0	0	0	1280000	0	0	1220000	0	120000	1600000
2132788	260000	1180000	1380000	2080000	1460000	0	0	0	1540000	1160000	1440000	1680000	540000	2240000	0	1460000	1480000	0	0	0	1440000	1960000	0	0	0	0	0	0	0	0	1060000	1380000	600000	320000	2140000	20000	60000	1600000
1019702656	0	980000	940000	1860000	0	1580000	0	0	1760000	0	0	0	480000	20000	0	1700000	0	0	0	0	1220000	0	0	0	0	0	0	0	0	1060000	820000	0	980000	1480000	0	680000	1100000	0
11304529	240000	1480000	1280000	1800000	1140000	1360000	0	20000	1360000	1080000	1100000	0	1520000	1600000	0	1300000	1740000	0	300000	0	1180000	0	1000000	1700000	0	0	1140000	1400000	1600000	0	0	1220000	0	1300000	780000	0	100000	1140000
1025068911	0	940000	1020000	660000	0	0	0	0	0	0	0	0	0	0	0	0	0	0	0	0	1480000	0	0	0	0	0	0	0	0	0	0	0	0	0	0	0	0	0
554166	260000	1360000	40000	0	0	0	0	0	0	0	0	0	0	0	0	0	0	0	0	0	1500000	0	0	0	0	0	0	0	0	0	0	0	0	0	0	0	0	0
1027664438	0	2200000	560000	980000	1000000	1580000	0	0	1400000	920000	1220000	0	0	2380000	0	1400000	1180000	0	0	0	1200000	1620000	1140000	0	0	0	0	0	0	1260000	1060000	1120000	1280000	2020000	2020000	840000	1280000	1220000
1028731258	0	980000	1020000	1480000	860000	1540000	0	0	1260000	960000	1080000	1160000	1680000	1660000	0	1160000	1180000	0	0	0	1040000	1780000	0	0	0	0	0	0	0	800000	0	880000	580000	0	2880000	540000	980000	1280000
1028130501	20000	20000	1420000	20000	0	0	0	0	0	0	0	0	0	0	0	0	0	0	0	0	0	0	0	0	0	0	0	0	0	0	0	0	0	0	0	0	0	0
1020024280	0	1260000	500000	0	0	0	0	0	0	0	0	0	0	0	0	0	0	0	0	0	1260000	0	0	0	0	0	0	0	0	0	0	0	0	0	0	0	0	0
11037467	260000	1360000	1380000	1100000	0	0	0	0	0	0	0	0	0	0	0	0	0	0	0	0	1500000	0	0	0	0	0	0	0	0	0	0	0	0	0	0	0	0	0
11700242	100000	1080000	100000	0	0	0	0	0	0	0	0	0	0	0	0	0	0	0	0	0	1140000	0	0	0	0	0	0	0	0	0	0	0	0	0	0	0	0	0
1023872491	0	980000	1000000	1540000	0	0	0	0	440000	0	0	0	0	0	0	1000000	0	0	0	0	1040000	0	0	0	0	0	0	0	0	0	0	0	0	0	0	0	0	0
1029234530	220000	920000	1060000	1820000	0	0	0	0	1220000	0	0	0	0	0	0	1180000	0	0	0	0	980000	0	0	0	0	0	0	0	0	0	0	0	0	0	0	0	0	0
1031284240	260000	1440000	1420000	2240000	0	0	0	0	0	0	0	0	0	0	0	0	0	0	0	0	1420000	0	0	0	0	0	0	0	0	0	0	0	0	0	0	0	0	0
1020607331	180000	1100000	1100000	500000	0	0	0	0	0	0	0	0	0	0	40000	0	0	0	0	0	520000	0	0	0	0	0	0	0	0	0	0	0	0	0	0	0	0	0
11300491	0	1380000	1380000	1420000	0	0	0	0	1480000	0	0	0	0	0	0	1480000	0	0	0	0	1520000	0	0	0	0	0	0	0	0	0	0	0	0	0	0	0	0	0
1019826868	120000	460000	1360000	1640000	0	0	0	0	1420000	0	0	0	0	0	0	1540000	0	0	0	0	940000	0	0	0	0	0	0	0	0	0	0	0	0	0	0	0	0	0
1032253890	0	2740000	1400000	2000000	0	0	0	0	0	0	0	0	0	0	0	0	0	0	0	0	3040000	0	0	0	0	0	0	0	0	0	0	0	0	0	0	0	0	0
1029762354	260000	1340000	900000	0	1240000	1720000	820000	1200000	0	0	940000	1320000	1900000	1660000	0	0	1420000	940000	1020000	1200000	1520000	1860000	1160000	1840000	1720000	1820000	1800000	1980000	0	1280000	980000	40000	1280000	1920000	0	840000	1260000	0
1021785498	0	660000	740000	680000	0	0	0	0	700000	0	0	0	0	0	0	560000	0	0	0	0	420000	0	0	0	0	0	0	0	0	0	0	0	0	0	0	0	0	0
5814373	240000	1160000	340000	1240000	1000000	0	0	1040000	640000	940000	1160000	0	0	1380000	1640000	720000	400000	0	500000	820000	1240000	0	1040000	100000	0	660000	0	0	0	980000	720000	1140000	920000	1360000	1820000	580000	700000	1240000
1028338709	0	1500000	700000	0	0	0	0	0	0	0	0	0	0	0	0	0	0	0	0	0	1440000	0	0	0	0	0	0	0	0	0	0	0	0	0	0	0	0	0
1026722324	140000	880000	460000	240000	0	0	0	0	0	0	0	0	0	0	0	0	0	0	0	0	940000	0	0	0	0	0	0	0	0	0	0	0	0	0	0	0	0	0
1899709	40000	1080000	1400000	700000	0	0	0	0	0	0	0	0	0	0	0	80000	0	0	0	0	580000	0	0	0	0	0	0	0	0	0	0	0	0	0	0	0	0	0
1019777959	0	1040000	100000	0	0	0	0	0	0	0	0	0	0	0	0	0	0	0	0	0	980000	0	0	0	0	0	0	0	0	0	0	0	0	0	0	0	0	0
1028559940	260000	1420000	1380000	2460000	0	0	0	0	1360000	1300000	1600000	0	0	2420000	0	1560000	0	0	0	0	1620000	0	0	0	0	0	0	0	0	0	0	0	0	0	1320000	0	0	1620000
459034	0	1760000	1000000	1960000	0	0	0	0	0	1180000	1540000	0	0	1520000	0	400000	0	0	0	0	840000	0	0	0	0	0	0	0	0	0	0	0	0	0	1660000	0	0	1720000
1021173789	160000	800000	800000	220000	0	0	0	0	0	0	0	0	0	0	0	0	0	0	0	0	980000	0	0	0	0	0	0	0	0	0	0	0	0	0	0	0	0	0
1027541960	160000	940000	960000	1520000	840000	1300000	460000	480000	1040000	820000	1040000	720000	1260000	1540000	1320000	1020000	1040000	600000	620000	1540000	920000	1520000	720000	1020000	1100000	1420000	1180000	1340000	1440000	720000	680000	1000000	800000	1260000	1500000	580000	780000	1080000
1030560547	40000	1440000	1840000	2240000	0	0	0	0	0	0	0	0	0	40000	0	80000	0	0	0	0	1380000	0	0	0	0	0	0	0	0	0	0	0	0	0	0	0	0	0
1018502949	20000	420000	340000	620000	40000	0	0	0	480000	100000	0	0	620000	0	1240000	1000000	940000	0	540000	0	600000	1200000	780000	0	0	1420000	0	0	0	1460000	160000	20000	860000	680000	0	340000	320000	0
11829239	140000	1420000	1460000	1640000	1240000	1940000	0	0	1580000	1160000	1440000	1700000	1880000	2340000	0	660000	1560000	0	0	0	1560000	2060000	200000	0	0	0	0	0	0	1320000	1060000	1440000	1280000	2060000	2240000	840000	1300000	1740000
1021771932	100000	20000	1020000	1800000	0	0	0	0	1520000	0	0	0	0	80000	0	40000	0	60000	100000	0	760000	0	40000	0	0	0	0	0	0	0	60000	0	0	20000	0	0	0	0
1025173194	200000	940000	920000	1760000	0	0	0	0	0	0	0	0	0	0	0	20000	0	0	0	0	1240000	0	0	0	0	0	0	0	0	0	0	0	0	0	0	0	0	0
12240060	260000	1400000	1400000	2260000	0	0	0	0	1520000	0	0	0	0	0	0	1540000	0	0	0	0	1680000	0	0	0	0	0	0	0	0	0	0	0	0	0	0	0	0	0
1027554731	140000	860000	940000	0	0	0	0	0	0	0	180000	0	0	80000	0	0	0	0	0	0	960000	0	0	0	0	0	0	0	0	0	0	0	0	0	0	0	0	0
9855778	20000	880000	1620000	200000	0	0	0	0	0	0	0	0	0	0	0	20000	0	0	0	0	420000	0	0	0	0	0	0	0	0	0	0	0	0	0	0	40000	0	0
5108191	260000	1360000	1380000	2300000	0	0	0	0	0	0	0	0	0	0	0	1140000	0	0	0	0	1560000	0	0	0	0	0	0	0	0	0	0	0	0	0	0	0	0	0
1019027359	260000	1440000	1400000	2280000	0	0	0	0	0	0	0	0	0	0	0	220000	0	0	0	0	1380000	0	0	0	0	0	0	0	0	0	0	0	0	0	0	0	0	0
2330517	260000	1360000	1380000	1720000	0	0	0	0	40000	0	1440000	0	0	2240000	0	0	0	0	0	0	2000000	0	0	0	0	0	0	0	0	0	0	0	0	0	0	0	0	540000
1029809099	120000	860000	1020000	1620000	0	0	0	0	1060000	0	0	0	0	380000	0	1060000	0	0	0	0	1080000	0	0	0	0	0	0	0	0	0	0	0	0	0	0	0	0	0
1025591437	360000	1420000	1520000	2280000	0	0	0	0	1520000	0	0	0	0	0	0	1700000	0	0	0	0	1560000	0	0	0	0	0	0	0	0	0	0	0	0	0	0	0	0	0
1019569637	0	1080000	1600000	1200000	100000	0	0	0	1680000	60000	160000	0	0	940000	0	1360000	40000	0	0	0	120000	0	0	0	0	0	0	0	0	0	0	100000	0	0	280000	0	0	100000
1022843045	200000	1040000	1440000	2220000	0	0	0	0	0	0	0	0	0	0	0	20000	0	0	0	0	960000	0	0	0	0	0	0	0	0	0	0	0	0	0	0	0	0	0
1024633549	180000	1500000	720000	1640000	1240000	0	0	0	1080000	1180000	1700000	1680000	340000	2280000	0	1220000	1420000	0	0	0	1540000	40000	0	0	0	0	0	0	0	0	0	1500000	0	0	2320000	0	0	100000
1031749895	0	1020000	1180000	2080000	0	0	0	0	1300000	1140000	1400000	0	0	1920000	0	1240000	0	0	0	0	1120000	0	0	0	0	0	0	0	0	0	0	0	0	0	0	0	0	1380000
1023215869	180000	1060000	940000	1580000	20000	1300000	0	0	500000	0	0	0	0	0	0	960000	0	0	0	0	1140000	0	0	0	0	20000	0	0	0	0	0	0	0	0	0	0	0	0
1029521326	140000	260000	420000	780000	1020000	1540000	640000	960000	700000	680000	860000	1260000	1600000	1340000	1760000	460000	1060000	740000	840000	1640000	660000	1500000	940000	1720000	1400000	2000000	1480000	1860000	1360000	760000	640000	760000	1040000	1620000	1260000	520000	600000	920000
9082288	140000	900000	820000	520000	0	0	0	0	0	0	0	0	0	0	0	0	0	0	0	0	840000	0	0	0	0	0	0	0	0	0	0	0	0	0	0	0	0	0
1028353115	0	1100000	200000	0	1020000	1360000	0	0	0	0	0	0	0	0	0	0	1200000	0	0	0	1040000	0	0	1840000	1500000	2080000	0	0	0	0	0	640000	0	0	0	0	1160000	0
1014679337	200000	920000	980000	1000000	980000	1380000	540000	1180000	1320000	840000	1140000	1280000	1340000	1760000	1580000	1220000	1220000	660000	740000	1960000	1060000	1620000	820000	1720000	1360000	1940000	1740000	2280000	1500000	880000	760000	1660000	900000	1700000	2040000	620000	960000	1360000
4511262	240000	2600000	80000	40000	0	0	0	0	20000	0	0	0	0	0	0	40000	0	0	0	0	1280000	0	0	0	0	0	0	0	0	0	0	0	0	0	0	0	0	0
1030160330	0	0	1420000	2440000	1280000	1920000	0	0	780000	1200000	1540000	1720000	2060000	2320000	0	1520000	1620000	0	0	0	0	2180000	0	0	0	0	0	0	0	0	0	1460000	0	0	2280000	0	40000	1660000
1031609157	300000	1520000	680000	900000	0	0	0	0	1040000	0	0	0	0	100000	0	1780000	0	0	0	0	1800000	0	0	0	0	0	0	0	0	0	0	0	0	0	0	0	0	0
1030937714	320000	1640000	1380000	2440000	0	0	0	0	0	0	0	0	0	0	0	60000	0	0	0	0	1980000	0	0	0	0	0	0	0	0	0	0	0	0	0	0	0	0	0
1023761726	260000	1080000	1560000	2240000	0	0	0	0	0	0	0	0	0	0	0	840000	0	0	0	0	1280000	0	0	0	0	0	0	0	0	0	0	0	0	0	0	0	0	0
1029617964	260000	1360000	1380000	2220000	0	0	0	0	1440000	0	0	0	0	0	0	1480000	0	0	0	0	1520000	0	0	0	0	0	0	0	0	0	0	0	0	0	0	0	0	0
[truncated: 2,767 more rows]
