# Supplementary material for: A MOOC Video Viewing Behavior Analysis Algorithm
Source: Hindawi journal article supplement (doi:10.1155/2018/7560805), 2018-10-16
Supplement: f1 [file 7560805.f1.zip › supplementary description.docx]

A MOOC Video Viewing Behavior Analysis Algorithm

Data description

**Abstract**

*The data was provided by the Chinese University MOOC, which contains a total of three courses. The mathematical modeling analysis course is Advanced Mathematics (https://www.icourse163.org/course/NUDT-9004) which contains 129 videos. The other two courses are Game Theory which contains 38 videos and First Aid Knowledge which contains 19 videos. Our team participated in the construction of MOOC and published 4 courses on it, including Advanced Mathematics. We provide raw data and hope to help find the laws of video design by sharing.*

**Specifications Table** *[please fill in right-hand column of the table below]*

| Subject area | *Massive open online courses* |
| --- | --- |
| More specific subject area | *Online learning behavior* |
| Type of data | *Excel file* |
| How data was acquired | *Collected by Chinese University MOOC* |
| Data format | *Raw* |
| Experimental factors | *The data only retains the data of the learners who have watched the video.* |
| Data source location | *Beijing, China (the Chinese University MOOC )* |
| Data accessibility | *Data does not have direct access to the connection.* |

**Value of the data**

- **Viewing video data includes learners' interest in video duration and in various periods. It helps us to optimize the design of the video.**
- **The data comes from a full semester and the data is complete.**
- **This course is one of the earliest five courses released by the Chinese University MOOC and was evaluated as a national quality course.**
- **Compare with other data, the data comes from Chinese courses and can be used as a video contrast analysis material for various languages.**

**Data**

The video viewing behavior data was provided by the MOOC of China University. Advanced Mathematics (<https://www.icourse163.org/course/NUDT-9004>) contains 129 videos. The other two courses are Game Theory(https://www.icourse163.org/course/ZJU-20001) which contains 38 videos and First Aid Knowledge(https://www.icourse163.org/course/WHU-85001) which contains 19 videos. Videos are released in the order of their numbers. The time range of the data is one semester. The sampling period for the data we obtained is 10 seconds. Thus, the viewing duration we get is an integer multiple of 10, and the unit is seconds.
